# Supplementary material for: The DBL-1/TGF-β signaling pathway tailors behavioral and molecular host responses to a variety of bacteria in Caenorhabditis elegans
Source: eLife. 2023 Sep 26;12:e75831. doi: 10.7554/eLife.75831 (PMC10567113; doi:10.7554/eLife.75831)
Supplement: Figure 1—figure supplement 1—source data 1. [file elife-75831-fig1-figsupp1-data1.xlsx]

## Sheet: E. coli OP50 control
Day 3			worm strain		Total	Chi-Square Tests
			WT	dbl-1(-)			Value	Asymptotic Significance (2-sided)	Exact Sig. (2-sided)
Smurf	1	Count	5	7	12	Pearson Chi-Square	1.32	0.5169
	2	Count	12	23	35
	3	Count	2	1	3
Day 4			worm strain		Total	Chi-Square Tests
			WT	dbl-1(-)			Value	Asymptotic Significance (2-sided)	Exact Sig. (2-sided)
Smurf	1	Count	1	1	2	Pearson Chi-Square	0.002638	0.9987
	2	Count	19	18	37
	3	Count	1	1	2
Day 5			worm strain		Total	Chi-Square Tests
			WT	dbl-1(-)			Value	Asymptotic Significance (2-sided)	Exact Sig. (2-sided)
Smurf						Pearson Chi-Square	0.02484	0.8748
	2	Count	26	29	55
	3	Count	4	5	9	Fisher's Exact Test			>0.9999
Day 6			worm strain		Total	Chi-Square Tests
			WT	dbl-1(-)			Value	Asymptotic Significance (2-sided)	Exact Sig. (2-sided)
Smurf						Pearson Chi-Square	0.9989	0.3176
	2	Count	21	17	38
	3	Count	2	4	6	Fisher's Exact Test			0.4029
Day 7			worm strain		Total	Chi-Square Tests
			WT	dbl-1(-)			Value	Asymptotic Significance (2-sided)	Exact Sig. (2-sided)
Smurf						Pearson Chi-Square	0.8194	0.3654
	2	Count	20	20	40
	3	Count	3	6	9	Fisher's Exact Test			0.4716
Day 8			worm strain		Total	Chi-Square Tests
			WT	dbl-1(-)			Value	Asymptotic Significance (2-sided)	Exact Sig. (2-sided)
Smurf						Pearson Chi-Square	0.08142	0.7754
	2	Count	14	17	31
	3	Count	6	6	12	Fisher's Exact Test			>0.9999
Day 9			worm strain		Total	Chi-Square Tests
			WT	dbl-1(-)			Value	Asymptotic Significance (2-sided)	Exact Sig. (2-sided)
Smurf						Pearson Chi-Square	0.3275	0.5671
	2	Count	14	11	25
	3	Count	7	8	15	Fisher's Exact Test			0.7451
Day 10			worm strain		Total	Chi-Square Tests
			WT	dbl-1(-)			Value	Asymptotic Significance (2-sided)	Exact Sig. (2-sided)
Smurf						Pearson Chi-Square	0.0002476	0.9874
	2	Count	14	11	25
	3	Count	9	7	16	Fisher's Exact Test			>0.9999
Day 11			worm strain		Total	Chi-Square Tests
			WT	dbl-1(-)			Value	Asymptotic Significance (2-sided)	Exact Sig. (2-sided)
Smurf						Pearson Chi-Square	1.257	0.2623
	2	Count	13	10	23
	3	Count	7	11	18	Fisher's Exact Test			0.3499

## Sheet: test bacteria
E. cloacae			wormstrain		Total	Chi-Square Tests
			WT	dbl-1(-)			Value	Asymptotic Significance (2-sided)	Exact Sig. (2-sided)
Smurf	2	Count	15	8	23	Pearson Chi-Square	2.67	0.102284
		Expected Count	12.2667	10.7333	23	Continuity Correction	1.78223	0.181876
	3	Count	9	13	22	Likelihood Ratio	2.69579	0.100613
		Expected Count	11.7333	10.2667	22	Fisher's Exact Test			0.139244
Total		Count	24	21	45	Linear-by-Linear Association	2.61025	0.106175
		Expected Count	24	21	45	N of Valid Cases	45
K. oxytoca			wormstrain		Total	Chi-Square Tests
			WT	dbl-1(-)			Value	Asymptotic Significance (2-sided)	Exact Sig. (2-sided)
Smurf	2	Count	20	22	42	Pearson Chi-Square	1.469	0.225494
		Expected Count	18.2264	23.7736	42	Continuity Correction	0.757517	0.384107
	3	Count	3	8	11	Likelihood Ratio	1.52632	0.216666
		Expected Count	4.77358	6.22642	11	Fisher's Exact Test			0.312649
Total		Count	23	30	53	Linear-by-Linear Association	1.44135	0.229922
		Expected Count	23	30	53	N of Valid Cases	53
S. marcescens			wormstrain		Total	Chi-Square Tests
			WT	dbl-1(-)			Value	Asymptotic Significance (2-sided)	Exact Sig. (2-sided)
Smurf	2	Count	22	23	45	Pearson Chi-Square	2.196	0.138397
		Expected Count	19.7368	25.2632	45	Continuity Correction	1.33267	0.24833
	3	Count	3	9	12	Likelihood Ratio	2.29989	0.129383
		Expected Count	5.26316	6.73684	12	Fisher's Exact Test			0.195272
Total		Count	25	32	57	Linear-by-Linear Association	2.15717	0.141906
		Expected Count	25	32	57	N of Valid Cases	57
B. megaterium			wormstrain		Total	Chi-Square Tests
			WT	dbl-1(-)			Value	Asymptotic Significance (2-sided)	Exact Sig. (2-sided)
Smurf	2	Count	20	27	47	Pearson Chi-Square	0.265	0.606503
		Expected Count	19.3036	27.6964	47	Continuity Correction	0.0211053	0.884492
	3	Count	3	6	9	Likelihood Ratio	0.270508	0.602991
		Expected Count	3.69643	5.30357	9	Fisher's Exact Test			0.722595
Total		Count	23	33	56	Linear-by-Linear Association	0.260561	0.609735
		Expected Count	23	33	56	N of Valid Cases	56
E. faecalis			wormstrain		Total	Chi-Square Tests
			WT	dbl-1(-)			Value	Asymptotic Significance (2-sided)	Exact Sig. (2-sided)
Smurf	2	Count	21	19	40	Pearson Chi-Square	1.03	0.310186
		Expected Count	19.2857	20.7143	40	Continuity Correction	0.516731	0.47224
	3	Count	6	10	16	Likelihood Ratio	1.03928	0.307988
		Expected Count	7.71429	8.28571	16	Fisher's Exact Test			0.382035
Total		Count	27	29	56	Linear-by-Linear Association	1.01149	0.314545
		Expected Count	27	29	56	N of Valid Cases	56
S. epidermidis			wormstrain		Total	Chi-Square Tests
			WT	dbl-1(-)			Value	Asymptotic Significance (2-sided)	Exact Sig. (2-sided)
Smurf	2	Count	13	8	21	Pearson Chi-Square	0.889	0.345647
		Expected Count	11.413	9.58696	21	Continuity Correction	0.417234	0.518321
	3	Count	12	13	25	Likelihood Ratio	0.893732	0.344468
		Expected Count	13.587	11.413	25	Fisher's Exact Test			0.387391
Total		Count	25	21	46	Linear-by-Linear Association	0.870041	0.350944
		Expected Count	25	21	46	N of Valid Cases	46
