# Supplementary material for: The DBL-1/TGF-β signaling pathway tailors behavioral and molecular host responses to a variety of bacteria in Caenorhabditis elegans
Source: eLife. 2023 Sep 26;12:e75831. doi: 10.7554/eLife.75831 (PMC10567113; doi:10.7554/eLife.75831)
Supplement: Figure 1—figure supplement 2—source data 1. [file elife-75831-fig1-figsupp2-data1.xlsx]

## Sheet: Sheet1
Unpaired t test
wormstrain	Mean	N
WT	920602	4
dbl-1(-)	1276994	4
Difference between means ± SEM	356392 ± 790620
95% confidence interval	-1578187 to 2290970
R squared (eta squared)	0.03276
P value	0.668
