# Supplementary material for: The DBL-1/TGF-β signaling pathway tailors behavioral and molecular host responses to a variety of bacteria in Caenorhabditis elegans
Source: eLife. 2023 Sep 26;12:e75831. doi: 10.7554/eLife.75831 (PMC10567113; doi:10.7554/eLife.75831)
Supplement: Figure 1—source data 1. [file elife-75831-fig1-data1.xlsx]

## Sheet: Fig 1 source data
Means and Medians for Survival Time							Pairwise comparisons
Worm strain	Bacteria	Mean					E. coli OP50		WT
		Estimate	Std. Error	n	95% Confidence Interval		Log Rank (Mantel-Cox)		Log Rank (Mantel-Cox)
					Lower Bound	Upper Bound	Chi-Square	Sig.	Chi-Square	Sig.
WT	E. coli OP50	12.3	0.371	110	11.572	13.028
	E. cloacae	16.221	0.387	104	15.462	16.98	46.694	0
dbl-1(-)	E. coli OP50	11.874	0.379	111	11.13	12.618			0.217	0.641
	E. cloacae	11.638	0.33	105	10.99	12.286	1.227	0.268	68.129	0
WT	E. coli OP50	12.3	0.371	110	11.572	13.028
	K. oxytoca	14.342	0.305	120	13.744	14.939	13.469	0
dbl-1(-)	E. coli OP50	11.874	0.379	111	11.13	12.618			0.217	0.641
	K. oxytoca	12.546	0.315	108	11.929	13.164	0.067	0.796	15.659	0
WT	E. coli OP50	15.1892	0.234429	111	14.7297	15.6487
	S. marcescens	15.0935	0.279662	107	14.5453	15.6416	0.0280338	0.867029
dbl-1(-)	E. coli OP50	14.5773	0.215803	97	14.1543	15.0003			6.31035	0.0120035
	S. marcescens	8.55856	0.246078	111	8.07625	9.04087	160.72	7.87691e-37	171.729	3.1006e-39
WT	E. coli OP50	14.0632	0.23889	95	13.5949	14.5314
	B. megaterium	16.5357	0.204963	84	16.134	16.9374	38.335	5.9585e-10
dbl-1(-)	E. coli OP50	13.9881	0.215901	84	13.5649	14.4113			0.360562	0.548195
	B. megaterium	15.25	0.221399	84	14.8161	15.6839	17.7366	2.53703e-05	14.9736	0.000109026
WT	E. coli OP50	13.322	0.237	121	12.858	13.787
	E. faecalis	17.465	0.323	129	16.832	18.098	94.972	0
dbl-1(-)	E. coli OP50	13.582	0.232	122	13.128	14.036			0.229	0.632
	E. faecalis	14.968	0.333	126	14.316	15.62	31.621	0	31.832	0
WT	E. coli OP50	13.2033	0.216585	123	12.7787	13.6278
	S. epidermidis	15.9712	0.341726	104	15.3014	16.6409	58.6989	1.83744e-14
dbl-1(-)	E. coli OP50	13.7209	0.281877	129	13.1685	14.2734			6.07351	0.0137224
	S. epidermidis	11.8768	0.345813	138	11.199	12.5546	9.26446	0.00233643	64.8863	7.93476e-16
