# Supplementary material for: The DBL-1/TGF-β signaling pathway tailors behavioral and molecular host responses to a variety of bacteria in Caenorhabditis elegans
Source: eLife. 2023 Sep 26;12:e75831. doi: 10.7554/eLife.75831 (PMC10567113; doi:10.7554/eLife.75831)
Supplement: Figure 2—source data 1. [file elife-75831-fig2-data1.xlsx]

## Sheet: Fig 2 source data
Tukey's multiple comparisons test	Mean 1	Mean 2	Mean Diff.	SE of diff.	N1	N2	99.00% CI of diff.	Adjusted P Value
E. coli OP50:WT vs. E. coli OP50:dbl-1(-)	80.21	77.67	2.541	1.102	12	12	-1.485 to 6.567	0.3023
E. cloacae:WT vs. E. cloacae:dbl-1(-)	75.54	75.33	0.2084	1.102	12	12	-3.817 to 4.234	>0.9999
K. oxytoca:WT vs. K. oxytoca:dbl-1(-)	77.29	71.17	6.125	1.102	12	12	2.099 to 10.15	<0.0001
S. marcescens:WT vs. S. marcescens:dbl-1(-)	80.33	77.08	3.25	1.102	12	12	-0.1720 to 6.672	0.0751
E. coli OP50:WT vs. E. cloacae:WT	80.21	75.54	4.667	1.102	12	12	0.6408 to 8.692	0.0014
E. coli OP50:WT vs. K. oxytoca:WT	80.21	77.29	2.917	1.102	12	12	-1.109 to 6.942	0.1537
E. coli OP50:WT vs. S. marcescens:WT	80.21	80.33	-0.125	1.102	12	12	-4.151 to 3.901	>0.9999
E. coli OP50:dbl-1(-) vs. E. cloacae:dbl-1(-)	77.67	75.33	2.334	1.102	12	12	-1.692 to 6.360	0.4121
E. coli OP50:dbl-1(-) vs. K. oxytoca:dbl-1(-)	77.67	71.17	6.5	1.102	12	12	2.474 to 10.53	<0.0001
E. coli OP50:dbl-1(-) vs. S. marcescens:dbl-1(-)	77.67	77.08	0.5837	1.102	12	12	-2.838 to 4.006	0.9995
E. coli OP50:WT vs. E. coli OP50:dbl-1(-)	76.63	73.08	3.542	1.656	12	12	-2.514 to 9.598	0.399
B. megaterium:WT vs. B. megaterium:dbl-1(-)	61.83	61.46	0.375	1.656	12	12	-5.681 to 6.431	>0.9999
E. faecalis:WT vs. E. faecalis:dbl-1(-)	59.92	45.15	14.76	1.624	12	13	8.824 to 20.70	<0.0001
S. epidermidis:WT vs. S. epidermidis:dbl-1(-)	58.04	50.81	7.229	1.851	12	8	0.4583 to 14.00	0.0045
E. coli OP50:WT vs. B. megaterium:WT	76.63	61.83	14.79	1.656	12	12	8.736 to 20.85	<0.0001
E. coli OP50:WT vs. E. faecalis:WT	76.63	59.92	16.71	1.656	12	12	10.65 to 22.76	<0.0001
E. coli OP50:WT vs. S. epidermidis:WT	76.63	58.04	18.58	1.656	12	12	12.53 to 24.64	<0.0001
E. coli OP50:dbl-1(-) vs. B. megaterium:dbl-1(-)	73.08	61.46	11.63	1.656	12	12	5.569 to 17.68	<0.0001
E. coli OP50:dbl-1(-) vs. E. faecalis:dbl-1(-)	73.08	45.15	27.93	1.624	12	13	21.99 to 33.87	<0.0001
E. coli OP50:dbl-1(-) vs. S. epidermidis:dbl-1(-)	73.08	50.81	22.27	1.851	12	8	15.50 to 29.04	<0.0001
																			85
																			85
																			85
																			85
																			85
																			85
																			85
																			85
																			85
																			85
																			85
																			85
																			85
																			85
																			85
																			85
																			85
																			85
																			85
																			85
																			85
																			85
																			85
																			85
																			85
																			85
																			85
																			85
