# Supplementary material for: The DBL-1/TGF-β signaling pathway tailors behavioral and molecular host responses to a variety of bacteria in Caenorhabditis elegans
Source: eLife. 2023 Sep 26;12:e75831. doi: 10.7554/eLife.75831 (PMC10567113; doi:10.7554/eLife.75831)
Supplement: Figure 3—source data 1. [file elife-75831-fig3-data1.xlsx]

## Sheet: A. E. coli OP50
E. coli OP50
Descriptive Statistics
Worm Strain		Mean	Std. Deviation	N
A0	WT	0	0	3
	dbl-1(-)	0	0	3
	sma-2(-)	0	0	3
	sma-3(-)	0	0	3
	sma-4(-) LW	0	0	3
	sma-4(-) DR	0	0	3
	Total	0	0	18
A12	WT	0	0	3
	dbl-1(-)	0.0190476	0.0329914	3
	sma-2(-)	0	0	3
	sma-3(-)	0	0	3
	sma-4(-) LW	0	0	3
	sma-4(-) DR	0	0	3
	Total	0.0031746	0.0134687	18
A24	WT	0	0	3
	dbl-1(-)	0	0	3
	sma-2(-)	0.053833	0.0167881	3
	sma-3(-)	0	0	3
	sma-4(-) LW	0.010101	0.0174955	3
	sma-4(-) DR	0.0602911	0.038566	3
	Total	0.0207042	0.0310026	18
A48	WT	0.0796197	0.044753	3
	dbl-1(-)	0.107746	0.035582	3
	sma-2(-)	0.0565754	0.023868	3
	sma-3(-)	0.0502976	0.0472484	3
	sma-4(-) LW	0.229918	0.0523739	3
	sma-4(-) DR	0.219252	0.03777	3
	Total	0.123902	0.0833107	18
Multiple Comparisons
Measure: Tukey HSD	Fraction
Worm Strain		Mean Difference	Std. Error	Sig.	95% Confidence Interval
					Lower Bound	Upper Bound
WT	dbl-1(-)	-0.0117936	0.0102995	0.853467	-0.0463886	0.0228015
	sma-2(-)	-0.00769715	0.0102995	0.971451	-0.0422922	0.0268979
	sma-3(-)	0.00733053	0.0102995	0.976792	-0.0272645	0.0419256
	sma-4(-) LW	-.0401*	0.0102995	0.0203001	-0.0746949	-0.00550481
	sma-4(-) DR	-.0500*	0.0102995	0.00410728	-0.0845759	-0.0153857
*. The mean difference is significant at the .05 level.

## Sheet: B. E. cloacae
E. cloacae
Descriptive Statistics
Worm Strain		Mean	Std. Deviation	N
A0	WT	0	0	3
	dbl-1(-)	0	0	3
	sma-2(-)	0	0	3
	sma-3(-)	0	0	3
	sma-4(-) LW	0	0	3
	sma-4(-) DR	0	0	3
	Total	0	0	18
A12	WT	0	0	3
	dbl-1(-)	0.0487734	0.0440652	3
	sma-2(-)	0	0	3
	sma-3(-)	0	0	3
	sma-4(-) LW	0.276852	0.0633634	3
	sma-4(-) DR	0.296489	0.0398704	3
	Total	0.103686	0.137707	18
A24	WT	0	0	3
	dbl-1(-)	0.475309	0.131381	3
	sma-2(-)	0.34174	0.151841	3
	sma-3(-)	0.0625889	0.0681156	3
	sma-4(-) LW	0.527052	0.0964596	3
	sma-4(-) DR	0.647038	0.193629	3
	Total	0.342288	0.266105	18
A48	WT	0.098757	0.013728	3
	dbl-1(-)	0.710058	0.0371743	3
	sma-2(-)	0.863141	0.0390729	3
	sma-3(-)	0.806494	0.0424309	3
	sma-4(-) LW	0.67807	0.125113	3
	sma-4(-) DR	0.584928	0.19592	3
	Total	0.623575	0.27144	18
Multiple Comparisons
Measure: Tukey HSD	Fraction
Worm Strain		Mean Difference	Std. Error	Sig.	95% Confidence Interval
					Lower Bound	Upper Bound
WT	dbl-1(-)	-.2838*	0.033468	2.38247e-05	-0.396262	-0.17143
	sma-2(-)	-.2765*	0.033468	3.11391e-05	-0.388947	-0.164115
	sma-3(-)	-.1926*	0.033468	0.000988621	-0.304998	-0.0801651
	sma-4(-) LW	-.3458*	0.033468	2.96217e-06	-0.45822	-0.233388
	sma-4(-) DR	-.3574*	0.033468	2.07062e-06	-0.469841	-0.245008
*. The mean difference is significant at the .05 level.

## Sheet: C. K. oxytoca
Descriptive Statistics
Worm Strain		Mean	Std. Deviation	N
A0	WT	0	0	3
	dbl-1(-)	0	0	3
	sma-2(-)	0	0	3
	sma-3(-)	0	0	3
	sma-4(jj278)	0	0	3
	sma-4(e729)	0	0	3
	Total	0	0	18
A12	WT	0	0	3
	dbl-1(-)	0.269349	0.0294022	3
	sma-2(-)	0.0218638	0.0189422	3
	sma-3(-)	0.0111111	0.019245	3
	sma-4(jj278)	0.143443	0.045893	3
	sma-4(e729)	0.054329	0.0164032	3
	Total	0.0833493	0.100856	18
A24	WT	0.0107527	0.0186242	3
	dbl-1(-)	0.405541	0.115256	3
	sma-2(-)	0.444444	0.101835	3
	sma-3(-)	0.291188	0.0988595	3
	sma-4(jj278)	0.274725	0.115776	3
	sma-4(e729)	0.308576	0.038492	3
	Total	0.289205	0.161718	18
A48	WT	0.394253	0.0784393	3
	dbl-1(-)	0.784545	0.076919	3
	sma-2(-)	0.910723	0.0116247	3
	sma-3(-)	0.882405	0.0774397	3
	sma-4(jj278)	0.555128	0.230972	3
	sma-4(e729)	0.591076	0.230448	3
	Total	0.686355	0.227445	18
Multiple Comparisons
Measure: Tukey HSD	Fraction
Worm Strain		Mean Difference	Std. Error	Sig.	95% Confidence Interval
					Lower Bound	Upper Bound
WT	dbl-1(-)	-.2636*	0.0391549	0.000234996	-0.395126	-0.132089
	sma-2(-)	-.2430*	0.0391549	0.000501633	-0.374525	-0.111488
	sma-3(-)	-.1949*	0.0391549	0.00335054	-0.326443	-0.0634062
	sma-4(jj278)	-.1421*	0.0391549	0.0317656	-0.273591	-0.0105545
	sma-4(e729)	-.1372*	0.0391549	0.0391107	-0.268762	-0.00572555
*. The mean difference is significant at the .05 level.

## Sheet: D. S. marcescens
Descriptive Statistics
Worm Strain		Mean	Std. Deviation	N
A0	WT	0	0	3
	dbl-1(-)	0	0	3
	sma-2(-)	0	0	3
	sma-3(-)	0	0	3
	sma-4(-) LW	0	0	3
	sma-4(-) DR	0	0	3
	Total	0	0	18
A12	WT	0	0	3
	dbl-1(-)	0.4115	0.0373897	3
	sma-2(-)	0.137028	0.0265595	3
	sma-3(-)	0.0645161	0.0558726	3
	sma-4(-) LW	0.250623	0.11709	3
	sma-4(-) DR	0.457253	0.140283	3
	Total	0.220153	0.187445	18
A24	WT	0.296791	0.0764257	3
	dbl-1(-)	0.871673	0.0063296	3
	sma-2(-)	0.773277	0.0386946	3
	sma-3(-)	0.775479	0.0683916	3
	sma-4(-) LW	0.488817	0.0828776	3
	sma-4(-) DR	0.711216	0.156473	3
	Total	0.652875	0.21562	18
A48	WT	0.575758	0.16872	3
	dbl-1(-)	0.859123	0.100327	3
	sma-2(-)	0.903333	0.0503322	3
	sma-3(-)	0.897619	0.0335875	3
	sma-4(-) LW	0.916667	0.144338	3
	sma-4(-) DR	0.677609	0.106311	3
	Total	0.805018	0.163768	18
Multiple Comparisons
Measure: Tukey HSD	Fraction
Worm Strain		Mean Difference	Std. Error	Sig.	95% Confidence Interval
					Lower Bound	Upper Bound
WT	dbl-1(-)	-.3174*	0.0432019	0.000100965	-0.462548	-0.172325
	sma-2(-)	-.2353*	0.0432019	0.00159255	-0.380384	-0.0901605
	sma-3(-)	-.2163*	0.0432019	0.00320422	-0.361378	-0.0711546
	sma-4(-) LW	-.1959*	0.0432019	0.00693145	-0.341001	-0.0507776
	sma-4(-) DR	-.2434*	0.0432019	0.0011897	-0.388494	-0.0982706
*. The mean difference is significant at the .05 level.

## Sheet: E. B. megaterium
Descriptive Statistics
Worm Strain		Mean	Std. Deviation	N
A0	WT	0	0	3
	dbl-1(-)	0	0	3
	sma-2(-)	0	0	3
	sma-3(-)	0	0	3
	sma-4(-) LW	0	0	3
	sma-4(-) DR	0	0	3
	Total	0	0	18
A12	WT	0.0246914	0.0427667	3
	dbl-1(-)	0.350085	0.224058	3
	sma-2(-)	0.171014	0.16827	3
	sma-3(-)	0.0888889	0.07698	3
	sma-4(-) LW	0.499181	0.228502	3
	sma-4(-) DR	0.237374	0.0263539	3
	Total	0.228539	0.208037	18
A24	WT	0.713207	0.0790837	3
	dbl-1(-)	0.671379	0.137789	3
	sma-2(-)	0.153156	0.0405744	3
	sma-3(-)	0.632345	0.0722142	3
	sma-4(-) LW	0.426797	0.191479	3
	sma-4(-) DR	0.35648	0.146417	3
	Total	0.492227	0.229465	18
A48	WT	0.653175	0.137691	3
	dbl-1(-)	0.484343	0.205918	3
	sma-2(-)	0.477341	0.0897885	3
	sma-3(-)	0.651991	0.248672	3
	sma-4(-) LW	0.400694	0.067711	3
	sma-4(-) DR	0.662808	0.17606	3
	Total	0.555059	0.1766	18
Multiple Comparisons
Measure: Tukey HSD	Fraction
Worm Strain		Mean Difference	Std. Error	Sig.	95% Confidence Interval
					Lower Bound	Upper Bound
WT	dbl-1(-)	-0.0286835	0.0512892	0.991998	-0.20096	0.143593
	sma-2(-)	0.14739	0.0512892	0.111065	-0.0248859	0.319667
	sma-3(-)	0.00446204	0.0512892	0.999999	-0.167814	0.176738
	sma-4(-) LW	0.0160999	0.0512892	0.999476	-0.156176	0.188376
	sma-4(-) DR	0.0336028	0.0512892	0.983785	-0.138673	0.205879
*. The mean difference is significant at the .05 level.

## Sheet: F. E. faecalis
Descriptive Statistics
Worm Strain		Mean	Std. Deviation	N
A0	WT	0	0	3
	dbl-1(-)	0	0	3
	sma-2(-)	0	0	3
	sma-3(-)	0	0	3
	sma-4(-) LW	0	0	3
	sma-4(-) DR	0	0	3
	Total	0	0	18
A12	WT	0.183333	0.125831	3
	dbl-1(-)	0.32218	0.167159	3
	sma-2(-)	0.0724811	0.0655732	3
	sma-3(-)	0.175265	0.0486954	3
	sma-4(-) LW	0.151256	0.0803819	3
	sma-4(-) DR	0.067225	0.0376508	3
	Total	0.161957	0.120502	18
A24	WT	0.0925926	0.160375	3
	dbl-1(-)	0.0589744	0.0523605	3
	sma-2(-)	0.0333333	0.057735	3
	sma-3(-)	0.177643	0.0645458	3
	sma-4(-) LW	0.233333	0.0400617	3
	sma-4(-) DR	0.0883257	0.0978743	3
	Total	0.114034	0.103219	18
A48	WT	0.0533333	0.092376	3
	dbl-1(-)	0.0867521	0.0119123	3
	sma-2(-)	0.031746	0.0549857	3
	sma-3(-)	0.0920833	0.0817803	3
	sma-4(-) LW	0.261905	0.0858465	3
	sma-4(-) DR	0.277778	0.254588	3
	Total	0.133933	0.144526	18
Multiple Comparisons
Measure: Tukey HSD	Fraction
Worm Strain		Mean Difference	Std. Error	Sig.	95% Confidence Interval
					Lower Bound	Upper Bound
WT	dbl-1(-)	-0.0346619	0.0468377	0.972607	-0.191986	0.122662
	sma-2(-)	0.0479247	0.0468377	0.901299	-0.109399	0.205249
	sma-3(-)	-0.0289329	0.0468377	0.987492	-0.186257	0.128391
	sma-4(-) LW	-0.0793087	0.0468377	0.559983	-0.236633	0.0780153
	sma-4(-) DR	-0.0260173	0.0468377	0.99224	-0.183341	0.131307
*. The mean difference is significant at the .05 level.

## Sheet: G. S. epidermidis
Descriptive Statistics
Worm Strain		Mean	Std. Deviation	N
A0	WT	0	0	3
	dbl-1(-)	0	0	3
	sma-2(-)	0	0	3
	sma-3(-)	0	0	3
	sma-4(-) LW	0	0	3
	sma-4(-) DR	0	0	3
	Total	0	0	18
A12	WT	0.0896552	0.101593	3
	dbl-1(-)	0.273862	0.175846	3
	sma-2(-)	0.137566	0.192177	3
	sma-3(-)	0.033179	0.00334115	3
	sma-4(-) LW	0.16697	0.0797741	3
	sma-4(-) DR	0.151703	0.0268096	3
	Total	0.142156	0.125711	18
A24	WT	0.0289855	0.0502044	3
	dbl-1(-)	0.146617	0.146809	3
	sma-2(-)	0.0196078	0.0339618	3
	sma-3(-)	0.0880087	0.0784771	3
	sma-4(-) LW	0.298864	0.0682183	3
	sma-4(-) DR	0.17138	0.0834806	3
	Total	0.125577	0.121179	18
A48	WT	0.0144928	0.0251022	3
	dbl-1(-)	0.12406	0.111077	3
	sma-2(-)	0.0333333	0.057735	3
	sma-3(-)	0	0	3
	sma-4(-) LW	0.32619	0.0921216	3
	sma-4(-) DR	0.642857	0.132566	3
	Total	0.190156	0.247694	18
Multiple Comparisons
Measure: Tukey HSD	Fraction
Worm Strain		Mean Difference	Std. Error	Sig.	95% Confidence Interval
					Lower Bound	Upper Bound
WT	dbl-1(-)	-0.102851	0.0328037	0.0725261	-0.213036	0.00733392
	sma-2(-)	-0.0143435	0.0328037	0.997439	-0.124529	0.0958417
	sma-3(-)	0.00298644	0.0328037	0.999999	-0.107199	0.113172
	sma-4(-) LW	-.1647*	0.0328037	0.00312507	-0.274908	-0.0545375
	sma-4(-) DR	-.2082*	0.0328037	0.000408262	-0.318387	-0.0980167
*. The mean difference is significant at the .05 level.
