# Supplementary material for: The DBL-1/TGF-β signaling pathway tailors behavioral and molecular host responses to a variety of bacteria in Caenorhabditis elegans
Source: eLife. 2023 Sep 26;12:e75831. doi: 10.7554/eLife.75831 (PMC10567113; doi:10.7554/eLife.75831)
Supplement: Figure 4—figure supplement 1—source data 1. [file elife-75831-fig4-figsupp1-data1.xlsx]

## Sheet: E. coli OP50
sma-2	Worm Strain	Mean ΔCt	SD	N
	WT	10.82	0.18	3
	dbl-1(-)	11.15	0.28	3
	Difference between means (dbl-1(-) - WT) ± SEM	0.3300 ± 0.1954
	95% confidence interval	-0.2126 to 0.8726
	R squared (eta squared)	0.4162
	P value	0.1666
	One- or two-tailed P value?	Two-tailed
	t, df	t=1.689, df=4
sma-3	Worm Strain	Mean ΔCt	SD	N
	WT	10.81	0.08	3
	dbl-1(-)	10.42	0.26	3
	Difference between means (dbl-1(-) - WT) ± SEM	-0.3867 ± 0.1586
	95% confidence interval	-0.8269 to 0.05359
	R squared (eta squared)	0.5978
	P value	0.0713
	One- or two-tailed P value?	Two-tailed
	t, df	t=2.438, df=4
sma-4	Worm Strain	Mean ΔCt	SD	N
	WT	9.417	0.2631	3
	dbl-1(-)	9.39	0.19	3
	Difference between means (dbl-1(-) - WT) ± SEM	-0.02667 ± 0.1874
	95% confidence interval	-0.5469 to 0.4936
	R squared (eta squared)	0.005038
	P value	0.8937
	One- or two-tailed P value?	Two-tailed
	t, df	t=0.1423, df=4

## Sheet: E. cloacae
sma-2	Worm Strain	Mean ΔCt	SD	N
	WT	10.86	0.23	3
	dbl-1(-)	11.67	0.2	3
	Difference between means (dbl-1(-) - WT) ± SEM	0.8067 ± 0.1717
	95% confidence interval	0.3300 to 1.283
	R squared (eta squared)	0.8466
	P value	0.0093
	One- or two-tailed P value?	Two-tailed
	t, df	t=4.698, df=4
sma-3	Worm Strain	Mean ΔCt	SD	N
	WT	10.46	0.22	3
	dbl-1(-)	10.1	0.08	3
	Difference between means (dbl-1(-) - WT) ± SEM	-0.3600 ± 0.1340
	95% confidence interval	-0.7320 to 0.01204
	R squared (eta squared)	0.6434
	P value	0.0549
	One- or two-tailed P value?	Two-tailed
	t, df	t=2.687, df=4
sma-4	Worm Strain	Mean ΔCt	SD	N
	WT	9.583	0.13	3
	dbl-1(-)	9.69	0.14	3
	Difference between means (dbl-1(-) - WT) ± SEM	0.1067 ± 0.1113
	95% confidence interval	-0.2022 to 0.4156
	R squared (eta squared)	0.1869
	P value	0.392
	One- or two-tailed P value?	Two-tailed
	t, df	t=0.9588, df=4

## Sheet: K. oxytoca
sma-2	Worm Strain	Mean ΔCt	SD	N
	WT	10.75	0.04	3
	dbl-1(-)	11.61	0.06	3
	Difference between means (dbl-1(-) - WT) ± SEM	0.8600 ± 0.03944
	95% confidence interval	0.7505 to 0.9695
	R squared (eta squared)	0.9917
	P value	<0.0001
	One- or two-tailed P value?	Two-tailed
	t, df	t=21.80, df=4
sma-3	Worm Strain	Mean ΔCt	SD	N
	WT	10.41	0.13	3
	dbl-1(-)	10.57	0.11	3
	Difference between means (dbl-1(-) - WT) ± SEM	0.1567 ± 0.09752
	95% confidence interval	-0.1141 to 0.4274
	R squared (eta squared)	0.3922
	P value	0.1835
	One- or two-tailed P value?	Two-tailed
	t, df	t=1.606, df=4
sma-4	Worm Strain	Mean ΔCt	SD	N
	WT	9.65	0.07	3
	dbl-1(-)	9.77	0.06	3
	Difference between means (dbl-1(-) - WT) ± SEM	0.1200 ± 0.05033
	95% confidence interval	-0.01974 to 0.2597
	R squared (eta squared)	0.587
	P value	0.0756
	One- or two-tailed P value?	Two-tailed
	t, df	t=2.384, df=4

## Sheet: S. marcescens
sma-2	Worm Strain	Mean ΔCt	SD	N
	WT	10.92	0.28	3
	dbl-1(-)	12.07	0.73	3
	Difference between means (dbl-1(-) - WT) ± SEM	1.153 ± 0.4496
	95% confidence interval	-0.09507 to 2.402
	R squared (eta squared)	0.6219
	P value	0.0623
	One- or two-tailed P value?	Two-tailed
	t, df	t=2.565, df=4
sma-3	Worm Strain	Mean ΔCt	SD	N
	WT	10.52	0.26	3
	dbl-1(-)	10.41	0.25	3
	Difference between means (dbl-1(-) - WT) ± SEM	-0.1067 ± 0.2070
	95% confidence interval	-0.6814 to 0.4680
	R squared (eta squared)	0.06226
	P value	0.6335
	One- or two-tailed P value?	Two-tailed
	t, df	t=0.5153, df=4
sma-4	Worm Strain	Mean ΔCt	SD	N
	WT	9.643	0.1	3
	dbl-1(-)	9.893	0.13	3
	Difference between means (dbl-1(-) - WT) ± SEM	0.2500 ± 0.09250
	95% confidence interval	-0.006811 to 0.5068
	R squared (eta squared)	0.6462
	P value	0.0539
	One- or two-tailed P value?	Two-tailed
	t, df	t=2.703, df=4

## Sheet: B. megaterium
sma-2	Worm Strain	Mean ΔCt	SD	N
	WT	9.353	0.25	3
	dbl-1(-)	10.18	0.14	3
	Difference between means (dbl-1(-) - WT) ± SEM	0.8233 ± 0.2127
	95% confidence interval	0.2329 to 1.414
	R squared (eta squared)	0.7894
	P value	0.018
	One- or two-tailed P value?	Two-tailed
	t, df	t=3.872, df=4
sma-3	Worm Strain	Mean ΔCt	SD	N
	WT	10.71	0.22	3
	dbl-1(-)	10.79	0.19	3
	Difference between means (dbl-1(-) - WT) ± SEM	0.08333 ± 0.1708
	95% confidence interval	-0.3909 to 0.5576
	R squared (eta squared)	0.05616
	P value	0.6512
	One- or two-tailed P value?	Two-tailed
	t, df	t=0.4879, df=4
sma-4	Worm Strain	Mean ΔCt	SD	N
	WT	8.723	0.16	3
	dbl-1(-)	9.083	0.02	3
	Difference between means (dbl-1(-) - WT) ± SEM	0.3600 ± 0.09481
	95% confidence interval	0.09677 to 0.6232
	R squared (eta squared)	0.7828
	P value	0.0192
	One- or two-tailed P value?	Two-tailed
	t, df	t=3.797, df=4

## Sheet: E. faecalis
sma-2	Worm Strain	Mean ΔCt	SD	N
	WT	10.03	0.2	3
	dbl-1(-)	9.97	0.03	3
	Difference between means (dbl-1(-) - WT) ± SEM	-0.05667 ± 0.1607
	95% confidence interval	-0.5027 to 0.3894
	R squared (eta squared)	0.03016
	P value	0.7421
	One- or two-tailed P value?	Two-tailed
	t, df	t=0.3527, df=4
sma-3	Worm Strain	Mean ΔCt	SD	N
	WT	10.49	0.07	3
	dbl-1(-)	10.53	0.09	3
	Difference between means (dbl-1(-) - WT) ± SEM	0.03333 ± 0.06799
	95% confidence interval	-0.1554 to 0.2221
	R squared (eta squared)	0.05669
	P value	0.6496
	One- or two-tailed P value?	Two-tailed
	t, df	t=0.4903, df=4
sma-4	Worm Strain	Mean ΔCt	SD	N
	WT	8.623	0.07	3
	dbl-1(-)	8.82	0.22	3
	Difference between means (dbl-1(-) - WT) ± SEM	0.1967 ± 0.1326
	95% confidence interval	-0.1714 to 0.5648
	R squared (eta squared)	0.3549
	P value	0.2121
	One- or two-tailed P value?	Two-tailed
	t, df	t=1.483, df=4

## Sheet: S. epidermidis
sma-2	Worm Strain	Mean ΔCt	SD	N
	WT	8.62	0.11	3
	dbl-1(-)	9.28	0.1	3
	Difference between means (dbl-1(-) - WT) ± SEM	0.6600 ± 0.1739
	95% confidence interval	0.1772 to 1.143
	R squared (eta squared)	0.7827
	P value	0.0192
	One- or two-tailed P value?	Two-tailed
	t, df	t=3.796, df=4
sma-3	Worm Strain	Mean ΔCt	SD	N
	WT	10.29	0.39	3
	dbl-1(-)	10.44	0.12	3
	Difference between means (dbl-1(-) - WT) ± SEM	0.1500 ± 0.2358
	95% confidence interval	-0.5048 to 0.8048
	R squared (eta squared)	0.09184
	P value	0.5593
	One- or two-tailed P value?	Two-tailed
	t, df	t=0.6360, df=4
sma-4	Worm Strain	Mean ΔCt	SD	N
	WT	8.16	0.11	3
	dbl-1(-)	8.76	0.03	3
	Difference between means (dbl-1(-) - WT) ± SEM	0.6000 ± 0.06807
	95% confidence interval	0.4110 to 0.7890
	R squared (eta squared)	0.951
	P value	0.0009
	One- or two-tailed P value?	Two-tailed
	t, df	t=8.815, df=4
