# Supplementary material for: The DBL-1/TGF-β signaling pathway tailors behavioral and molecular host responses to a variety of bacteria in Caenorhabditis elegans
Source: eLife. 2023 Sep 26;12:e75831. doi: 10.7554/eLife.75831 (PMC10567113; doi:10.7554/eLife.75831)
Supplement: Figure 4—source data 1. [file elife-75831-fig4-data1.xlsx]

## Sheet: sma-2
Dunnett's multiple comparisons test	Mean ΔCt1	Mean ΔCt2	Mean Diff.	SE of diff.	n1	n2	95.00% CI of diff.	Adjusted P Value
WT E. coli OP50 vs. WT E. cloacae	10.82	10.86	-0.03667	0.1643	3	3	-0.5097 to 0.4364	0.9917
WT E. coli OP50 vs. WT K. oxytoca	10.82	10.75	0.07	0.1643	3	3	-0.4030 to 0.5430	0.9492
WT E. coli OP50 vs. WT S. marcescens	10.82	10.92	-0.09333	0.1643	3	3	-0.5664 to 0.3797	0.8936
dbl-1(-) E. coli OP50 vs. dbl-1(-) E. cloacae	11.15	11.67	-0.5133	0.3297	3	3	-1.463 to 0.4362	0.3369
dbl-1(-) E. coli OP50 vs. dbl-1(-) K. oxytoca	11.15	11.61	-0.46	0.3297	3	3	-1.410 to 0.4895	0.4141
dbl-1(-) E. coli OP50 vs. dbl-1(-) S. marcescens	11.15	12.07	-0.9167	0.3297	3	3	-1.866 to 0.03285	0.0579
WT E. coli OP50 vs. WT B. megaterium	9.225	9.353	-0.1283	0.1105	2	3	-0.4521 to 0.1954	0.5251
WT E. coli OP50 vs. WT E. faecalis	9.225	10.03	-0.8017	0.1105	2	3	-1.125 to -0.4779	0.0004
WT E. coli OP50 vs. WT S. epidermidis	9.225	8.62	0.605	0.1105	2	3	0.2812 to 0.9288	0.0023
dbl-1(-) E. coli OP50 vs. dbl-1(-) B. megaterium	10.1	10.18	-0.08	0.2157	3	3	-0.7012 to 0.5412	0.9651
dbl-1(-) E. coli OP50 vs. dbl-1(-) E. faecalis	10.1	9.97	0.1267	0.2157	3	3	-0.4945 to 0.7478	0.8847
dbl-1(-) E. coli OP50 vs. dbl-1(-) S. epidermidis	10.1	9.28	0.8167	0.2157	3	3	0.1955 to 1.438	0.0135

## Sheet: sma-3
Dunnett's multiple comparisons test	Mean ΔCt1	Mean ΔCt2	Mean Diff.	SE of diff.	n1	n2	95.00% CI of diff.	Adjusted P Value
WT E. coli OP50 vs. WT E. cloacae	10.81	10.46	0.35	0.152	3	3	-0.08768 to 0.7877	0.1176
WT E. coli OP50 vs. WT K. oxytoca	10.81	10.41	0.3967	0.152	3	3	-0.04102 to 0.8343	0.0746
WT E. coli OP50 vs. WT S. marcescens	10.81	10.52	0.29	0.152	3	3	-0.1477 to 0.7277	0.2084
dbl-1(-) E. coli OP50 vs. dbl-1(-) E. cloacae	10.42	10.1	0.3233	0.1569	3	3	-0.1286 to 0.7753	0.1677
dbl-1(-) E. coli OP50 vs. dbl-1(-) K. oxytoca	10.42	10.57	-0.1467	0.1569	3	3	-0.5986 to 0.3053	0.6849
dbl-1(-) E. coli OP50 vs.dbl-1(-) S. marcescens	10.42	10.41	0.01	0.1569	3	3	-0.4419 to 0.4619	0.9999
WT E. coli OP50 vs. WT B. megaterium	10.82	10.71	0.1067	0.1949	3	3	-0.4547 to 0.6680	0.9031
WT E. coli OP50 vs. WT E. faecalis	10.82	10.49	0.3233	0.1949	3	3	-0.2380 to 0.8847	0.2944
WT E. coli OP50 vs. WT S. epidermidis	10.82	10.29	0.5233	0.1949	3	3	-0.03803 to 1.085	0.0668
dbl-1(-) E. coli OP50 vs.dbl-1(-) B. megaterium	11.02	10.79	0.2233	0.16	3	3	-0.2373 to 0.6840	0.4136
dbl-1(-) E. coli OP50 vs. dbl-1(-) E. faecalis	11.02	10.53	0.49	0.16	3	3	0.02934 to 0.9507	0.0381
dbl-1(-) E. coli OP50 vs.dbl-1(-) S. epidermidis	11.02	10.44	0.5733	0.16	3	3	0.1127 to 1.034	0.0179

## Sheet: sma-4
Dunnett's multiple comparisons test	Mean ΔCt1	Mean ΔCt2	Mean Diff.	SE of diff.	n1	n2	95.00% CI of diff.	Adjusted P Value
WT E. coli OP50 vs. WT E. cloacae	9.417	9.583	-0.1667	0.1292	3	3	-0.5388 to 0.2055	0.4705
WT E. coli OP50 vs. WT K. oxytoca	9.417	9.65	-0.2333	0.1292	3	3	-0.6055 to 0.1388	0.2408
WT E. coliOP50 vs. WT S. marcescens	9.417	9.643	-0.2267	0.1292	3	3	-0.5988 to 0.1455	0.2586
dbl-1(-) E. coli OP50 vs. dbl-1(-) E. cloacae	9.39	9.69	-0.3	0.1122	3	3	-0.6231 to 0.02311	0.0679
dbl-1(-) E. coli OP50 vs. dbl-1(-) K. oxytoca	9.39	9.77	-0.38	0.1122	3	3	-0.7031 to -0.05689	0.0238
dbl-1(-) E. coli OP50 vs. dbl-1(-) S. marcescens	9.39	9.893	-0.5033	0.1122	3	3	-0.8264 to -0.1802	0.0052
WT E. coliOP50 vs. WT B. megaterium	9.42	8.723	0.6967	0.1136	3	3	0.3697 to 1.024	0.0007
WT E. coliOP50 vs.WT E. faecalis	9.42	8.623	0.7967	0.1136	3	3	0.4697 to 1.124	0.0003
WT E. coliOP50 vs. WT S. epidermidis	9.42	8.16	1.26	0.1136	3	3	0.9330 to 1.587	<0.0001
dbl-1(-) E. coli OP50 vs.dbl-1(-) B. megaterium	9.247	9.083	0.1633	0.09905	3	3	-0.1219 to 0.4486	0.2983
dbl-1(-) E. coli OP50 vs. dbl-1(-) E. faecalis	9.247	8.82	0.4267	0.09905	3	3	0.1414 to 0.7119	0.0066
dbl-1(-) E. coli OP50 vs.dbl-1(-) S. epidermidis	9.247	8.76	0.4867	0.09905	3	3	0.2014 to 0.7719	0.003
