# Supplementary material for: The DBL-1/TGF-β signaling pathway tailors behavioral and molecular host responses to a variety of bacteria in Caenorhabditis elegans
Source: eLife. 2023 Sep 26;12:e75831. doi: 10.7554/eLife.75831 (PMC10567113; doi:10.7554/eLife.75831)
Supplement: Figure 5—source data 1. [file elife-75831-fig5-data1.xlsx]

## Sheet: Figure 5H source data
Dunnett's multiple comparisons test	Mean 1	Mean 2	Mean Diff.	SE of diff.	n1	n2	95.00% CI of diff.	Adjusted P Value
E. coli OP50 vs. E. cloacae	6.797	87.3	-80.51	15.92	15	15	-118.9 to -42.08	<0.0001
E. coli OP50 vs. K. oxytoca	6.797	46.54	-39.75	15.92	15	15	-78.18 to -1.317	0.041
E. coli OP50 vs. S. marcescens	6.797	25.94	-19.15	15.92	15	15	-57.57 to 19.28	0.4895

## Sheet: Figure 5I source data
Bacteria	GFP count	No GFP count	Total count	Chi square, df	P value (2-sided)
E. coli OP50	43	0	43
B. megaterium	0	44	44	87.00, 1	< 0.0001
E. faecalis	27	26	53	28.93, 1	< 0.0001
S. epidermidis	5	61	66	90.25, 1	< 0.0001
Bacteria	WT	Trial 1*	Trial 2	Trial 3	Mean from all trials
E. coli OP50	% animals with GFP	1	1	1	1
	n	14	15	14
B. megaterium	% animals with GFP	0	0	0	0
	n	15	14	15
E. faecalis	% animals with GFP	0.05	0.78	0.79	0.5094
	n	21	18	14
S. epidermidis	% animals with GFP	0.05	0.05	0.09	0.0606
	n	22	21	23
*Representative images from Trial 1 are presented in Figure 5E–G
