# Supplementary material for: The DBL-1/TGF-β signaling pathway tailors behavioral and molecular host responses to a variety of bacteria in Caenorhabditis elegans
Source: eLife. 2023 Sep 26;12:e75831. doi: 10.7554/eLife.75831 (PMC10567113; doi:10.7554/eLife.75831)
Supplement: Figure 6—figure supplement 1—source data 1. [file elife-75831-fig6-figsupp1-data1.xlsx]

## Sheet: A. WT Sm vs WT OP50
Gene_id	Gene name	Functional Category	readcount WT_Sm	readcount WT_OP50	log2FoldChange (WT_Sm/WT_OP50)	pval	padj
WBGene00022261	clec-210	Stress response: C-type Lectin	1.27741	164.948	-7.0126	1.2951e-10	1.9232e-07
WBGene00009526	clec-169	Stress response: C-type Lectin	13.4456	652.463	-5.6007	3.5256e-23	1.6753e-19
WBGene00016502	C37C3.10	Unassigned: regulated by multiple stresses	0.594148	26.6507	-5.4872	1.196e-08	1.1367e-05
WBGene00009255	ugt-34	Stress response: detoxification: ugt	1.55447	53.9716	-5.1177	9.7185e-12	2.3091e-08
WBGene00002260	lbp-8	Metabolism: lipid: binding	17.4222	398.057	-4.514	1.8099e-28	1.4334e-24
WBGene00008043	C40H1.8	Unassigned: regulated by multiple stresses	62.5434	813.384	-3.701	5.196e-23	2.0576e-19
WBGene00007245	C01G12.5	Metabolism: lipid: sterol	1.89919	24.3893	-3.6828	5.6878e-06	0.002758
WBGene00011671	cyp-13A4	Stress response: detoxification: CYP	3.57108	40.6412	-3.5085	1.8204e-06	0.000983
WBGene00003995	pgp-1	Transmembrane transport: ABC	394.047	4382.25	-3.4752	1.0386e-24	6.1693e-21
WBGene00015225	B0507.8	Cytoskeleton: unassigned	3.80458	35.916	-3.2388	1.69e-06	0.00093381
WBGene00016340	gba-2	Metabolism: lipid: sphingolipid	17.2453	128.866	-2.9016	1.1299e-11	2.4405e-08
WBGene00021337	Y34F4.2	Transmembrane protein: unassigned	22.9539	159.373	-2.7956	2.0249e-10	2.83e-07
WBGene00008678	stdh-2	Metabolism: lipid: sterol	4.39253	29.4043	-2.7429	5.8166e-05	0.019465
WBGene00011800	T16G1.6	Unassigned	90.8261	493.392	-2.4416	2.0036e-09	1.9836e-06
WBGene00011009	cyp-14A4	Stress response: detoxification: CYP	7.50833	37.0837	-2.3042	0.00012402	0.03829
WBGene00020587	ugt-9	Stress response: detoxification: ugt	110.577	531.249	-2.2643	6.3825e-11	1.011e-07
WBGene00019886	R05D8.9	Metabolism: lipid: sterol	8.33598	38.5677	-2.21	0.00016656	0.049468
WBGene00011668	clec-47	Stress response: C-type Lectin	184.168	846.997	-2.2013	4.086e-11	7.4421e-08
WBGene00044644	B0205.13	Unassigned	44.8551	198.701	-2.1473	1.5829e-08	1.4465e-05
WBGene00018393	msra-1	Metabolism: 1CC: unassigned	1525.75	6278.42	-2.0409	4.0176e-10	5.3032e-07
WBGene00019234	ugt-8	Stress response: detoxification: ugt	222.851	912.171	-2.0332	8.6343e-10	1.0258e-06
WBGene00011798	T16G1.4	Unassigned: regulated by multiple stresses	74.8524	306.144	-2.0321	2.468e-06	0.0013031
WBGene00020394	T10B5.8	Unassigned	36.725	147.992	-2.0107	3.243e-07	0.00020357
WBGene00017658	F21C10.9	Unassigned	288.451	1156.21	-2.003	1.1474e-05	0.0047829
WBGene00189956	Y34F4.6	Transmembrane protein: unassigned	12.589	49.9782	-1.9891	0.00016197	0.048713
WBGene00000986	dhs-23	Metabolism: short chain dehydrogenase	30.8223	118.415	-1.9418	4.4662e-06	0.0022108
WBGene00015449	ugt-63	Stress response: detoxification: ugt	99.2471	342.352	-1.7864	1.9448e-07	0.00013591
WBGene00011753	T13F3.6	Unassigned: regulated by multiple stresses	229.301	780.355	-1.7669	9.0467e-07	0.00055115
WBGene00016595	C42D4.2	Metabolism: unassigned	36.6337	115.818	-1.6606	4.593e-05	0.016049
WBGene00010705	cyp-14A1	Stress response: detoxification: CYP	28.9562	89.8873	-1.6342	0.00014742	0.044905
WBGene00008594	clec-57	Stress response: C-type Lectin	301.737	861.903	-1.5142	2.5692e-06	0.0013271
WBGene00005444	srh-237	Transmembrane protein: seven transmembrane receptor: srh	106.411	295.865	-1.4753	2.4246e-05	0.0090012
WBGene00020895	T28D9.3	Signaling: lipid: phosphatase	222.045	609.156	-1.456	9.2695e-06	0.0040044
WBGene00015930	C17H12.4	Metabolism: unassigned	276.893	749.097	-1.4358	1.4065e-05	0.0054784
WBGene00020471	pho-14	Lysosome: acid phosphatase	862.762	2303.39	-1.4167	5.9862e-06	0.0028446
WBGene00017962	fbxa-72	Proteolysis proteasome: E3: F box	141.618	366.247	-1.3708	0.0001072	0.033961
WBGene00022642	lipl-5	Metabolism: lipid: lipase	11849.1	5175.45	1.195	0.00010044	0.032248
WBGene00021627	Y47D7A.15	Unassigned: regulated by multiple stresses	217.196	82.7529	1.3921	0.00012409	0.03829
WBGene00010128	F55G11.8	Stress response: pathogen: CUB	1271.77	478.747	1.4095	2.6552e-05	0.0097057
WBGene00019368	K03H6.2	Unassigned: regulated by multiple stresses	529.422	199.147	1.4106	1.617e-05	0.0061968
WBGene00016061	hpo-15	Metabolism: unassigned	1937.1	711.42	1.4451	8.9083e-06	0.0039936
WBGene00019968	R08F11.4	Unassigned: regulated by multiple stresses	324.349	115.06	1.4952	1.7155e-05	0.0064699
WBGene00044206	T26H5.9	Unassigned: regulated by multiple stresses	347.009	121.732	1.5113	9.2051e-06	0.0040044
WBGene00007875	dod-24	Stress response: pathogen: unassigned	5839.61	2016.41	1.5341	1.1111e-06	0.00065998
WBGene00019021	F57H12.6	Unassigned: regulated by multiple stresses	318.986	105.78	1.5924	7.3278e-05	0.024182
WBGene00009488	oac-20	Metabolism: lipid: o-acyl transferase	122.743	39.9966	1.6177	5.3519e-05	0.018166
WBGene00019738	clec-265	Stress response: C-type Lectin	4304.86	1394.01	1.6267	2.7634e-05	0.0099483
WBGene00021731	Y49G5A.1	Proteolysis general: inhibitor: serine	181.64	58.2645	1.6404	9.931e-05	0.032248
WBGene00001786	gst-38	Stress response: detoxification: GST	586.791	186.487	1.6538	1.5411e-06	0.00087184
WBGene00019963	R08E5.3	Protein modification: methyltransferase	4070.29	1286.64	1.6615	1.3748e-07	0.00010208
WBGene00007404	best-5	Transmembrane transport: chloride channel	143.859	44.2871	1.6997	3.3588e-05	0.011911
WBGene00011262	pho-8	Lysosome: acid phosphatase	473.938	144.766	1.711	2.9463e-07	0.00019445
WBGene00009895	scl-2	Extracellular material: secreted protein	1072.17	324.022	1.7264	2.1758e-07	0.00014771
WBGene00021494	Y40B10B.1	Unassigned	123.9	37.1593	1.7374	4.6963e-05	0.016171
WBGene00008494	F01D5.3	Extracellular material: matrix	506.602	149.649	1.7593	3.2558e-07	0.00020357
WBGene00021167	cyp-32B1	Stress response: detoxification: CYP	130.269	38.331	1.7649	8.0355e-06	0.0036716
WBGene00010125	dod-22	Stress response: pathogen: CUB	710.128	206.714	1.7804	1.0985e-05	0.0046606
WBGene00012583	clec-4	Stress response: C-type Lectin	1383.26	390.554	1.8245	4.6201e-08	3.7853e-05
WBGene00044534	H23N18.6	Transmembrane protein: unassigned	104.532	26.9466	1.9558	7.8988e-06	0.0036716
WBGene00011979	T24B8.5	Stress response: pathogen: ShK	4808.99	1232.32	1.9644	1.5763e-09	1.6284e-06
WBGene00018971	clec-67	Stress response: C-type Lectin	3300.76	843.599	1.9682	1.2738e-05	0.0051298
WBGene00004176	pqn-97	Unassigned: prion domain	118.587	28.1677	2.0738	1.3346e-06	0.0007734
WBGene00000213	asm-3	Metabolism: lipid: sphingolipid	234.063	55.2403	2.0831	1.6869e-08	1.4845e-05
WBGene00006695	twk-45	Transmembrane transport: potassium channel	65.4802	15.4274	2.0856	1.2195e-05	0.0049959
WBGene00008584	irg-4	Stress response: pathogen: CUB	14635.3	3335.39	2.1335	4.3851e-11	7.4421e-08
WBGene00009773	lipl-2	Metabolism: lipid: lipase	759.993	171.909	2.1443	4.3845e-10	5.483e-07
WBGene00018731	F53A9.8	Stress response: pathogen: unassigned	7303.21	1589.4	2.2	1.9976e-08	1.6951e-05
WBGene00009226	cyp-37B1	Stress response: detoxification: CYP	283.153	61.2709	2.2083	1.267e-09	1.3683e-06
WBGene00012947	Y47H9C.1	Unassigned: regulated by multiple stresses	932.043	189.076	2.3014	3.9524e-12	1.0434e-08
WBGene00021032	clec-118	Stress response: C-type Lectin	101.809	19.6078	2.3764	8.3312e-08	6.3855e-05
WBGene00010127	F55G11.7	Stress response: pathogen: CUB	91.7792	16.6574	2.462	7.407e-08	5.8664e-05
WBGene00004177	pqn-98	Unassigned: prion domain	83.1005	14.614	2.5075	1.8341e-07	0.00013205
WBGene00015052	clec-52	Stress response: C-type Lectin	1547.58	266.758	2.5364	2.8788e-13	8.5502e-10
WBGene00001767	gst-19	Stress response: detoxification: GST	206.973	35.2606	2.5533	2.3408e-11	4.6348e-08
WBGene00012593	nspe-7	Unassigned: regulated by multiple stresses	224.493	32.9224	2.7695	1.3725e-05	0.0054349
WBGene00013637	Y105C5A.13	Unassigned: regulated by multiple stresses	72.6023	10.0826	2.8482	2.6815e-06	0.0013556
WBGene00001477	fmo-2	Metabolism: FMO	522.321	32.0599	4.0261	1.2628e-15	4.2862e-12
WBGene00003734	nhx-6	Transmembrane transport: sodium channel	2142.16	68.4668	4.9675	1.0602e-09	1.1996e-06
WBGene00015342	C02E7.10	Transmembrane protein: unassigned	2609.32	48.951	5.7362	1.1022e-34	1.3094e-30
WBGene00015338	catp-2	Transmembrane transport: unassigned	3838.95	35.3737	6.7619	6.9208e-61	1.6444e-56

## Sheet: B. dbl-1(-) Sm vs dbl-1(-) OP50
Gene_id	Gene name	Functional Category	readcount dbl-1(-)_Sm	readcount dbl-1(-)_OP50	log2FoldChange [dbl-1(-)_Sm/ dbl-1(-)_OP50]	pval	padj
WBGene00000111	alh-5	Metabolism: short chain dehydrogenase	180.292	472.084	-1.3887	0.00011065	0.033677
WBGene00000133	amt-1	Transmembrane transport: ammonium	5.19034	102.05	-4.2973	6.6479e-07	0.0004866
WBGene00000213	asm-3	Metabolism: lipid: sphingolipid	313.536	33.8805	3.2101	1.5552e-12	3.3116e-09
WBGene00000781	cpr-1	Proteolysis general: cysteine: cathepsin	24917.1	8609.35	1.5332	8.1446e-06	0.0034129
WBGene00000784	cpr-4	Proteolysis general: aspartate: cathepsin	8650.45	2923.03	1.5653	4.5906e-06	0.0021923
WBGene00001158	ech-9	Metabolism: lipid: beta oxidation	698.441	85.0952	3.037	8.7096e-16	2.2667e-12
WBGene00001477	fmo-2	Metabolism: FMO	673.15	21.6696	4.9572	3.0476e-06	0.0016601
WBGene00001767	gst-19	Stress response: detoxification: GST	101.038	5.96468	4.0823	5.8556e-14	1.3715e-10
WBGene00002260	lbp-8	Metabolism: lipid: binding	14.4966	490.652	-5.0809	1.8839e-20	1.4709e-16
WBGene00003734	nhx-6	Transmembrane transport: sodium channel	351.273	27.3659	3.6821	1.5259e-18	5.9567e-15
WBGene00003995	pgp-1	Transmembrane transport: ABC	207.378	2883.42	-3.7974	3.5308e-24	8.2701e-20
WBGene00004987	spp-2	Stress response: pathogen: saposin	2435.14	910.26	1.4197	5.1594e-05	0.017772
WBGene00004997	spp-12	Stress response: pathogen: saposin	142.751	8.61211	4.051	0.0001253	0.037622
WBGene00005003	spp-18	Stress response: pathogen: saposin	1967.08	786.828	1.3219	0.00012689	0.037622
WBGene00007404	best-5	Transmembrane transport: chloride channel	121.158	37.1426	1.7057	8.3888e-05	0.027675
WBGene00007872	C32H11.9	Stress response: pathogen: CUB	46.7415	6.46521	2.8539	1.8239e-06	0.0011242
WBGene00007885	ugt-21	Stress response: detoxification: ugt	111.196	291.786	-1.3918	0.0001463	0.042178
WBGene00008043	C40H1.8	Unassigned: regulated by multiple stresses	38.3185	479.672	-3.6459	1.0511e-19	6.1549e-16
WBGene00008295	nlp-39	Neuronal function: synaptic function: neuropeptide	132.703	41.5813	1.6742	0.00014766	0.042178
WBGene00008357	nspc-16	Unassigned	183.326	57.2644	1.6787	6.6261e-05	0.022493
WBGene00008594	clec-57	Stress response: C-type Lectin	77.7505	276.791	-1.8319	1.4877e-06	0.00094177
WBGene00008625	scl-14	Extracellular material: secreted protein	50.0843	8.55845	2.5489	4.4781e-06	0.0021852
WBGene00009221	acs-2	Metabolism: lipid: fatty acid	1027.41	3684.45	-1.8424	7.0044e-08	6.3102e-05
WBGene00009226	cyp-37B1	Stress response: detoxification: CYP	278.367	77.1604	1.8511	4.6797e-06	0.0021923
WBGene00009255	ugt-34	Stress response: detoxification: ugt	0.609598	30.1985	-5.6305	4.0443e-07	0.00031577
WBGene00009773	lipl-2	Metabolism: lipid: lipase	985.137	197.066	2.3216	5.1162e-10	7.0493e-07
WBGene00009877	F49C12.7	Signaling: unassigned	1891.49	362.402	2.3839	4.8665e-12	9.4989e-09
WBGene00009895	scl-2	Extracellular material: secreted protein	897.258	289.591	1.6315	5.073e-06	0.0022851
WBGene00010058	F54E4.2	Transmembrane protein: seven transmembrane receptor: unassigned	11.8493	89.1996	-2.9122	3.919e-08	3.8248e-05
WBGene00010062	lipl-1	Metabolism: lipid: lipase	1148.2	127.056	3.1758	5.6462e-17	1.6531e-13
WBGene00010411	H25K10.1	Lysosome: acid phosphatase	42.6437	237.778	-2.4792	8.0955e-10	1.0534e-06
WBGene00010705	cyp-14A1	Stress response: detoxification: CYP	22.2745	83.0324	-1.8983	3.7252e-05	0.013023
WBGene00010769	asah-1	Metabolism: lipid: sphingolipid	3729.64	1298.74	1.5219	8.7656e-06	0.003602
WBGene00011262	pho-8	Lysosome: acid phosphatase	383.224	95.7773	2.0004	0.00011071	0.033677
WBGene00011521	T06C12.14	Unassigned	236.467	6.11602	5.2729	8.0365e-06	0.0034129
WBGene00011671	cyp-13A4	Stress response: detoxification: CYP	5.53911	30.2944	-2.4513	0.00010986	0.033677
WBGene00011672	cyp-13A5	Stress response: detoxification: CYP	289.79	1031.75	-1.832	2.5312e-07	0.00020444
WBGene00011800	T16G1.6	Unassigned	82.8997	351.511	-2.0841	1.9524e-08	2.0787e-05
WBGene00012593	nspe-7	Unassigned: regulated by multiple stresses	172.559	13.9392	3.6299	6.4622e-12	1.1643e-08
WBGene00012947	Y47H9C.1	Unassigned: regulated by multiple stresses	697.228	129.666	2.4268	2.1819e-10	3.1941e-07
WBGene00013900	ugt-18	Stress response: detoxification: ugt	488.313	39.3771	3.6324	1.7354e-19	8.1297e-16
WBGene00015052	clec-52	Stress response: C-type Lectin	735.106	97.1727	2.9193	1.4913e-05	0.0058219
WBGene00015087	B0252.1	Signaling: Y kinase	51.9901	173.919	-1.7421	9.8844e-06	0.003965
WBGene00015338	catp-2	Transmembrane transport: unassigned	665.979	7.05646	6.5604	7.8647e-09	9.2107e-06
WBGene00015342	C02E7.10	Transmembrane protein: unassigned	690.936	10.7495	6.0062	1.0024e-06	0.00067081
WBGene00015449	ugt-63	Stress response: detoxification: ugt	27.9053	150.849	-2.4345	8.9232e-09	9.9527e-06
WBGene00015930	C17H12.4	Metabolism: unassigned	209.573	638.44	-1.6071	8.1595e-06	0.0034129
WBGene00016052	dod-3	Transmembrane protein: unassigned	1231.97	336.523	1.8722	9.5092e-05	0.030935
WBGene00016340	gba-2	Metabolism: lipid: sphingolipid	16.065	126.527	-2.9775	5.8076e-11	9.7165e-08
WBGene00016669	ilys-2	Stress response: pathogen: unassigned	39.6855	2.89451	3.7772	9.7117e-07	0.00066905
WBGene00016670	ilys-3	Proteolysis general: lysozyme	46.1429	0.295532	7.2867	5.5393e-06	0.0024481
WBGene00017485	F15E6.4	Unassigned: regulated by multiple stresses	240.765	897.394	-1.8981	3.0216e-05	0.010724
WBGene00017658	F21C10.9	Unassigned	110.035	370.545	-1.7517	2.377e-06	0.0013256
WBGene00018393	msra-1	Metabolism: 1CC: unassigned	705.843	2024.66	-1.5203	9.9873e-06	0.003965
WBGene00018731	F53A9.8	Stress response: pathogen: unassigned	10211.9	2648.97	1.9467	4.1365e-08	3.8756e-05
WBGene00018906	egas-4	Signaling: Notch	135.837	23.1181	2.5548	0.00013961	0.040875
WBGene00019234	ugt-8	Stress response: detoxification: ugt	192.169	611.56	-1.6701	2.0192e-06	0.0011535
WBGene00019368	K03H6.2	Unassigned: regulated by multiple stresses	400.039	115.808	1.7884	1.3935e-06	0.00090667
WBGene00019550	K09C4.5	Transmembrane transport: solute carrier	79.3322	250.712	-1.6601	9.7662e-05	0.031336
WBGene00019563	K09C6.9	Unassigned: regulated by multiple stresses	136.837	33.1959	2.0434	2.993e-05	0.010724
WBGene00019963	R08E5.3	Protein modification: methyltransferase	1664.82	625.843	1.4115	1.9366e-05	0.0074362
WBGene00019968	R08F11.4	Unassigned: regulated by multiple stresses	272.949	87.9802	1.6334	2.3328e-05	0.0086731
WBGene00019970	R08F11.7	Unassigned	147.619	27.2972	2.4351	1.9865e-06	0.0011535
WBGene00020326	math-38	Stress response: pathogen: unassigned	39.9488	3.71741	3.4258	1.4703e-07	0.00012755
WBGene00020394	T10B5.8	Unassigned	25.6204	175.705	-2.7778	6.2955e-11	9.8307e-08
WBGene00020587	ugt-9	Stress response: detoxification: ugt	111.123	372.79	-1.7462	1.8777e-06	0.0011277
WBGene00020674	T22B7.7	Metabolism: lipid: beta oxidation	10.4973	90.7274	-3.1115	4.82e-06	0.0022137
WBGene00021032	clec-118	Stress response: C-type Lectin	40.2882	4.78487	3.0738	3.2957e-06	0.0017154
WBGene00021335	spp-23	Unassigned: regulated by multiple stresses	1372.99	560.701	1.292	0.00010385	0.032873
WBGene00021337	Y34F4.2	Transmembrane protein: unassigned	8.99309	66.9187	-2.8955	8.9488e-07	0.00063518
WBGene00021580	clec-174	Stress response: C-type Lectin	155.196	29.3223	2.404	3.6738e-08	3.7414e-05
WBGene00021627	Y47D7A.15	Unassigned: regulated by multiple stresses	129.898	25.8469	2.3293	4.8901e-07	0.00036949
WBGene00022040	Y65B4BR.1	Signaling: lipid: phospholipase B	993.869	66.3373	3.9052	1.26e-17	4.2161e-14
WBGene00022256	Y73B6BL.37	Signaling: lipid: phospholipase B	30.6022	0.620404	5.6243	6.2598e-09	7.7171e-06
WBGene00022261	clec-210	Stress response: C-type Lectin	3.75878	162.65	-5.4354	1.196e-21	1.4007e-17
WBGene00044107	F58G6.9	Transmembrane transport: solute carrier	187.184	546.704	-1.5463	2.2443e-05	0.0084786
WBGene00044206	T26H5.9	Unassigned: regulated by multiple stresses	617.652	197.416	1.6456	3.7423e-06	0.001865
WBGene00044284	spp-21	Unassigned	37.1256	0.915935	5.341	2.2614e-07	0.00018917
WBGene00044447	ZK688.10	Transmembrane protein: unassigned	14.9938	0.324872	5.5283	2.8459e-05	0.010415
WBGene00044481	ZK185.5	Transmembrane transport: ion channel	109.742	304.739	-1.4735	7.9249e-05	0.026518
WBGene00044644	B0205.13	Unassigned	23.0364	98.1174	-2.0906	3.6099e-06	0.0018382
WBGene00189950	C39B5.14	Unassigned	76.2391	6.29206	3.5989	3.2766e-06	0.0017154

## Sheet: C. WT Sm vs dbl-1(-) Sm
C. Overlapping genes between panels A and B
Gene_id	Gene name	Functional Category	log2FoldChange (WT_Sm/WT_OP50)	log2FoldChange [dbl-1(-)_Sm/ dbl-1(-)_OP50]
WBGene00022261	clec-210	Stress response: C-type Lectin	-7.0126	-5.4354
WBGene00009255	ugt-34	Stress response: detoxification: ugt	-5.1177	-5.6305
WBGene00002260	lbp-8	Metabolism: lipid: binding	-4.514	-5.0809
WBGene00008043	C40H1.8	Unassigned: regulated by multiple stresses	-3.701	-3.6459
WBGene00011671	cyp-13A4	Stress response: detoxification: CYP	-3.5085	-2.4513
WBGene00003995	pgp-1	Transmembrane transport: ABC	-3.4752	-3.7974
WBGene00016340	gba-2	Metabolism: lipid: sphingolipid	-2.9016	-2.9775
WBGene00021337	Y34F4.2	Transmembrane protein: unassigned	-2.7956	-2.8955
WBGene00011800	T16G1.6	Unassigned	-2.4416	-2.0841
WBGene00020587	ugt-9	Stress response: detoxification: ugt	-2.2643	-1.7462
WBGene00044644	B0205.13	Unassigned	-2.1473	-2.0906
WBGene00018393	msra-1	Metabolism: 1CC: unassigned	-2.0409	-1.5203
WBGene00019234	ugt-8	Stress response: detoxification: ugt	-2.0332	-1.6701
WBGene00020394	T10B5.8	Unassigned	-2.0107	-2.7778
WBGene00017658	F21C10.9	Unassigned	-2.003	-1.7517
WBGene00015449	ugt-63	Stress response: detoxification: ugt	-1.7864	-2.4345
WBGene00010705	cyp-14A1	Stress response: detoxification: CYP	-1.6342	-1.8983
WBGene00008594	clec-57	Stress response: C-type Lectin	-1.5142	-1.8319
WBGene00015930	C17H12.4	Metabolism: unassigned	-1.4358	-1.6071
WBGene00021627	Y47D7A.15	Unassigned: regulated by multiple stresses	1.3921	2.3293
WBGene00019368	K03H6.2	Unassigned: regulated by multiple stresses	1.4106	1.7884
WBGene00019968	R08F11.4	Unassigned: regulated by multiple stresses	1.4952	1.6334
WBGene00044206	T26H5.9	Unassigned: regulated by multiple stresses	1.5113	1.6456
WBGene00019963	R08E5.3	Protein modification: methyltransferase	1.6615	1.4115
WBGene00007404	best-5	Transmembrane transport: chloride channel	1.6997	1.7057
WBGene00011262	pho-8	Lysosome: acid phosphatase	1.711	2.0004
WBGene00009895	scl-2	Extracellular material: secreted protein	1.7264	1.6315
WBGene00000213	asm-3	Metabolism: lipid: sphingolipid	2.0831	3.2101
WBGene00009773	lipl-2	Metabolism: lipid: lipase	2.1443	2.3216
WBGene00018731	F53A9.8	Stress response: pathogen: unassigned	2.2	1.9467
WBGene00009226	cyp-37B1	Stress response: detoxification: CYP	2.2083	1.8511
WBGene00012947	Y47H9C.1	Unassigned: regulated by multiple stresses	2.3014	2.4268
WBGene00021032	clec-118	Stress response: C-type Lectin	2.3764	3.0738
WBGene00015052	clec-52	Stress response: C-type Lectin	2.5364	2.9193
WBGene00001767	gst-19	Stress response: detoxification: GST	2.5533	4.0823
WBGene00012593	nspe-7	Unassigned: regulated by multiple stresses	2.7695	3.6299
WBGene00001477	fmo-2	Metabolism: FMO	4.0261	4.9572
WBGene00003734	nhx-6	Transmembrane transport: sodium channel	4.9675	3.6821
WBGene00015342	C02E7.10	Transmembrane protein: unassigned	5.7362	6.0062
WBGene00015338	catp-2	Transmembrane transport: unassigned	6.7619	6.5604

## Sheet: D. WT Ef vs WT OP50
Gene_id	Gene name	Functional Category	readcount WT_Ef	readcount WT_OP50	log2FoldChange (WT_Ef/WT_OP50)	pval	padj
WBGene00009526	clec-169	Stress response: C-type Lectin	21.995	598.827	-4.7669	5.3366e-23	1.25e-18
WBGene00014188	ZK1025.8	Extracellular material: chondroitin sulfotransferase	7.12274	164.854	-4.5326	0.00065167	0.031668
WBGene00021083	W08E12.2	Unassigned: regulated by multiple stresses	10.6731	218.081	-4.3528	0.0001228	0.010591
WBGene00007872	C32H11.9	Stress response: pathogen: CUB	1.55555	29.5325	-4.2468	4.5817e-07	0.0001626
WBGene00235296	C07G1.15	Transmembrane protein: unassigned	0.890185	14.721	-4.0476	0.0010464	0.043242
WBGene00007231	C01G10.4	Unassigned: regulated by multiple stresses	26.1075	428.478	-4.0367	4.0536e-05	0.0048196
WBGene00007232	C01G10.5	Unassigned: regulated by multiple stresses	24.8107	376.041	-3.9219	9.999e-07	0.00030336
WBGene00044163	F49C5.11	Unassigned: regulated by multiple stresses	2.11305	28.6873	-3.763	0.0012228	0.047497
WBGene00002260	lbp-8	Metabolism: lipid: binding	33.3475	366.706	-3.459	1.8273e-18	1.4267e-14
WBGene00022261	clec-210	Stress response: C-type Lectin	14.3787	150.958	-3.3921	3.2611e-05	0.0041514
WBGene00020472	lips-11	Metabolism: lipid: lipase	2.53611	25.8502	-3.3495	0.00011238	0.0099332
WBGene00019021	F57H12.6	Unassigned: regulated by multiple stresses	10.732	97.9672	-3.1904	5.964e-07	0.00019677
WBGene00017424	F13C5.3	Unassigned	1.88823	17.2021	-3.1875	0.0013027	0.049031
WBGene00000030	abu-7	Unassigned	4.48688	38.8085	-3.1126	5.3368e-06	0.0010593
WBGene00045457	F33H12.7	Unassigned: regulated by multiple stresses	17.3125	143.812	-3.0543	0.00019713	0.014799
WBGene00018645	F49F1.5	Development: apoptosis	48.4273	365.091	-2.9144	4.3318e-10	6.0922e-07
WBGene00044074	mltn-5	Transmembrane protein: unassigned	2.90475	21.6509	-2.8979	0.00046185	0.025757
WBGene00016037	dop-6	Neuronal function: synaptic function: neurotransmitter receptor	21.9698	160.838	-2.872	1.5708e-05	0.0024367
WBGene00009710	F44G3.10	Cytoskeleton: claudin	27.027	197.605	-2.8701	2.1709e-07	9.5941e-05
WBGene00000743	col-170	Extracellular material: collagen	72.314	525.822	-2.8622	2.3748e-06	0.0005676
WBGene00012728	Y39G8B.9	Unassigned: regulated by multiple stresses	112.752	787.903	-2.8049	4.0126e-05	0.0048196
WBGene00010411	H25K10.1	Lysosome: acid phosphatase	17.3401	117.115	-2.7557	3.3963e-06	0.00075762
WBGene00003995	pgp-1	Transmembrane transport: ABC	603.572	4031.31	-2.7396	1.1221e-15	6.5707e-12
WBGene00007241	C01G10.16	Unassigned	3.29185	21.7205	-2.7221	0.00066473	0.032058
WBGene00021585	clec-74	Stress response: C-type Lectin	4.56816	29.5047	-2.6913	0.00014916	0.012167
WBGene00011672	cyp-13A5	Stress response: detoxification: CYP	138.809	847.653	-2.6104	5.2755e-05	0.0058661
WBGene00008594	clec-57	Stress response: C-type Lectin	130.211	794.436	-2.6091	1.1932e-13	4.658e-10
WBGene00000722	col-149	Extracellular material: collagen	277.459	1662.3	-2.5828	6.7668e-07	0.00021133
WBGene00000742	col-169	Extracellular material: collagen	319.385	1848.35	-2.5329	1.4548e-06	0.00038724
WBGene00003542	nas-23	Proteolysis general: metallopeptidase	11.8182	68.258	-2.53	1.0727e-06	0.00031804
WBGene00001535	gcy-8	Signaling: heteromeric G protein: guanylyl cyclase	15.2746	87.5151	-2.5184	1.0604e-07	5.2844e-05
WBGene00018910	F56A4.2	Stress response: C-type Lectin	45.1709	258.378	-2.516	5.6347e-07	0.00019128
WBGene00000729	col-156	Extracellular material: collagen	40.3798	222.754	-2.4637	4.4216e-10	6.0922e-07
WBGene00017658	F21C10.9	Unassigned	194.028	1068.73	-2.4616	4.2699e-06	0.00090121
WBGene00001786	gst-38	Stress response: detoxification: GST	32.4369	171.681	-2.404	1.5581e-08	1.0336e-05
WBGene00017751	F23F12.3	Transmembrane transport: solute carrier	10.8286	54.796	-2.3392	0.00011221	0.0099332
WBGene00021583	clec-72	Stress response: C-type Lectin	215.109	1086.03	-2.3359	2.818e-08	1.7148e-05
WBGene00009857	clec-28	Stress response: C-type Lectin	4.59698	23.2021	-2.3355	0.0010468	0.043242
WBGene00008891	clec-42	Stress response: C-type Lectin	56.353	284.047	-2.3336	4.2708e-06	0.00090121
WBGene00045401	eol-1	mRNA functions: processing: decapping	7.53768	37.6341	-2.3198	0.00015817	0.012559
WBGene00009517	clec-167	Stress response: C-type Lectin	6.54677	32.3909	-2.3067	0.00039493	0.023965
WBGene00017312	pitr-5	Transmembrane transport: solute carrier	30.671	148.239	-2.273	9.686e-05	0.0091852
WBGene00011800	T16G1.6	Unassigned	94.925	456.374	-2.2654	1.5081e-07	7.0651e-05
WBGene00011676	cyp-13A2	Stress response: detoxification: CYP	143.695	672.61	-2.2268	5.9666e-05	0.0064404
WBGene00019152	nspb-6	Unassigned: regulated by multiple stresses	15.2144	70.7975	-2.2183	0.00079161	0.035795
WBGene00008519	cyp-13B1	Stress response: detoxification: CYP	108.168	503.093	-2.2176	1.432e-06	0.00038553
WBGene00009255	ugt-34	Stress response: detoxification: ugt	10.746	49.593	-2.2063	0.0011296	0.045222
WBGene00000637	col-61	Extracellular material: collagen	10.9177	49.7681	-2.1886	0.00011379	0.01002
WBGene00000666	col-91	Extracellular material: collagen	127.923	576.446	-2.1719	2.1546e-06	0.0005257
WBGene00011473	T05C12.11	Transmembrane protein: unassigned	6.98829	31.4494	-2.17	0.0007978	0.035868
WBGene00000655	col-79	Extracellular material: collagen	9.31582	41.7077	-2.1626	0.00083446	0.036809
WBGene00016180	C28C12.4	Unassigned	177.143	787.064	-2.1516	2.2411e-07	9.7211e-05
WBGene00000734	col-161	Extracellular material: collagen	173.182	766.684	-2.1463	5.4874e-10	7.1406e-07
WBGene00000740	col-167	Extracellular material: collagen	1303.13	5758.48	-2.1437	3.9415e-11	8.3929e-08
WBGene00000735	col-162	Extracellular material: collagen	76.0366	334.054	-2.1353	1.3109e-06	0.00036124
WBGene00015398	tag-293	Transmembrane protein: seven transmembrane receptor: unassigned	33.2835	145.771	-2.1308	0.00093357	0.039614
WBGene00018176	F38B6.7	Unassigned	8.87653	38.8385	-2.1294	0.00033602	0.021044
WBGene00000594	col-3	Extracellular material: collagen	370.688	1620.72	-2.1284	1.8081e-10	3.0251e-07
WBGene00019886	R05D8.9	Metabolism: lipid: sterol	8.14639	35.5727	-2.1265	0.00088149	0.038165
WBGene00006534	tba-8	Cytoskeleton: microtubule: tubulin	93.0832	404.421	-2.1193	0.00010302	0.009576
WBGene00000753	col-180	Extracellular material: collagen	164.487	709.444	-2.1087	1.4261e-09	1.4956e-06
WBGene00000739	col-166	Extracellular material: collagen	2916.05	12565.3	-2.1074	5.4224e-11	1.0063e-07
WBGene00044394	B0034.7	Unassigned	8.16709	35.1637	-2.1062	0.00056385	0.029219
WBGene00003522	nas-3	Proteolysis general: metallopeptidase	29.4738	126.524	-2.1019	9.0595e-07	0.00027921
WBGene00017092	E02C12.6	Unassigned: regulated by multiple stresses	16.4861	70.192	-2.0901	2.3071e-05	0.0033357
WBGene00001397	fat-5	Metabolism: lipid: fatty acid	229.686	977.663	-2.0897	5.5852e-11	1.0063e-07
WBGene00021580	clec-174	Stress response: C-type Lectin	47.6144	201.764	-2.0832	2.8551e-08	1.7148e-05
WBGene00004008	pgp-14	Transmembrane transport: ABC	525.626	2218.84	-2.0777	3.2924e-10	5.1412e-07
WBGene00000727	col-154	Extracellular material: collagen	267.493	1123.65	-2.0706	0.0001061	0.0097844
WBGene00015225	B0507.8	Cytoskeleton: unassigned	7.88785	32.9166	-2.0611	0.0012129	0.047272
WBGene00022230	Y73B6A.3	Unassigned: regulated by multiple stresses	14.8574	61.5268	-2.05	5.8683e-05	0.0064066
WBGene00007141	pitr-4	Transmembrane transport: solute carrier	11.7301	48.5631	-2.0497	0.00015187	0.012209
WBGene00011798	T16G1.4	Unassigned: regulated by multiple stresses	68.5809	283.355	-2.0467	2.2001e-06	0.00053126
WBGene00206354	F27E5.9	Unassigned: membrane spanning domain	24.696	102.023	-2.0465	4.2597e-06	0.00090121
WBGene00044109	K02E11.10	Unassigned: regulated by multiple stresses	266.251	1079.91	-2.02	2.7382e-09	2.6724e-06
WBGene00003057	lon-3	Extracellular material: collagen	201.859	816.14	-2.0155	4.1494e-09	3.7381e-06
WBGene00003523	nas-4	Proteolysis general: metallopeptidase	69.3372	279.458	-2.0109	0.00020553	0.015186
WBGene00000741	col-168	Extracellular material: collagen	332.446	1339.1	-2.0101	1.0564e-09	1.2373e-06
WBGene00001695	grd-6	Signaling: hedgehog-like	92.7724	372.515	-2.0055	3.0136e-08	1.7476e-05
WBGene00016785	C49G7.7	Unassigned	9.2821	37.0924	-1.9986	0.00076252	0.035003
WBGene00000691	col-117	Extracellular material: collagen	455.38	1815.87	-1.9955	2.9444e-05	0.0038964
WBGene00021587	clec-76	Stress response: C-type Lectin	97.1531	386.554	-1.9923	1.2963e-06	0.00036124
WBGene00016659	C45B2.2	Unassigned: regulated by multiple stresses	104.127	414.013	-1.9913	4.6842e-08	2.4936e-05
WBGene00003547	nas-29	Proteolysis general: metallopeptidase	15.6757	62.1188	-1.9865	0.0003218	0.020317
WBGene00018789	F54C1.1	Protein modification: carbohydrate	12.3388	48.539	-1.9759	0.00031895	0.020191
WBGene00000599	col-10	Extracellular material: collagen	2457.28	9578.4	-1.9627	1.4686e-09	1.4956e-06
WBGene00001759	gst-11	Stress response: unassigned	13.4538	52.2679	-1.9579	0.00097301	0.040876
WBGene00019619	asp-14	Proteolysis general: aspartate: unassigned	680.084	2633.21	-1.953	0.00014757	0.012085
WBGene00014184	ZK1025.4	Unassigned: Glycosyltransferase family A	8.83343	34.1552	-1.9511	0.001081	0.043958
WBGene00000718	col-145	Extracellular material: collagen	30.671	118.164	-1.9458	5.0895e-06	0.0010277
WBGene00020360	math-41	Unassigned: meprin-associated Traf homology domain	197.152	758.603	-1.944	9.3731e-09	7.8409e-06
WBGene00000602	col-13	Extracellular material: collagen	174.412	667.334	-1.9359	2.153e-08	1.363e-05
WBGene00000717	col-144	Extracellular material: collagen	1902.86	7213.81	-1.9226	3.2909e-09	3.0833e-06
WBGene00008292	C54C8.4	Transmembrane protein: unassigned	17.7644	66.634	-1.9073	9.8736e-05	0.0093254
WBGene00003909	pag-3	Neuronal function: unassigned	13.2937	49.8633	-1.9072	0.00030864	0.019591
WBGene00008559	F07H5.8	Unassigned: regulated by multiple stresses	24.3912	90.5636	-1.8926	3.0921e-05	0.0040014
WBGene00050875	bah-1	Unassigned: membrane spanning domain	60.8357	224.872	-1.8861	0.0011784	0.046372
WBGene00018706	F52F10.2	Transmembrane transport: major facilitator	41.589	153.589	-1.8848	0.0012037	0.04699
WBGene00015795	C15F1.2	Unassigned: regulated by multiple stresses	108.702	400.718	-1.8822	9.5608e-08	4.8683e-05
WBGene00000399	cdh-7	Cytoskeleton: cadherin	170.523	627.763	-1.8803	1.4914e-08	1.0336e-05
WBGene00001699	grd-10	Signaling: hedgehog-like	295.565	1087.51	-1.8795	2.3764e-07	9.8167e-05
WBGene00001553	gcy-33	Signaling: heteromeric G protein: guanylyl cyclase	14.3184	52.649	-1.8785	0.0003793	0.023318
WBGene00017798	slc-17.8	Transmembrane transport: solute carrier	18.0485	66.2882	-1.8769	0.0012545	0.047933
WBGene00017212	F07E5.7	Unassigned: regulated by multiple stresses	8.61896	31.5671	-1.8728	0.0012798	0.048822
WBGene00000649	col-73	Extracellular material: collagen	1407.61	5151.54	-1.8718	1.2289e-08	9.9253e-06
WBGene00000631	col-54	Extracellular material: collagen	156.017	570.256	-1.8699	1.2724e-05	0.0021442
WBGene00004000	pgp-6	Transmembrane transport: ABC	82.4598	300.675	-1.8664	3.2583e-07	0.00012511
WBGene00008988	F20G2.5	Stress response: pathogen: unassigned	27.8242	101.08	-1.8611	2.424e-05	0.003441
WBGene00050939	C05G5.7	Development: somatic	77.7362	281.905	-1.8586	0.00024963	0.017005
WBGene00015865	C16E9.1	Unassigned: regulated by multiple stresses	68.7089	247.64	-1.8497	3.0279e-07	0.0001182
WBGene00138711	R07B1.13	Unassigned: regulated by multiple stresses	19.9112	71.2701	-1.8397	0.00022371	0.016074
WBGene00000166	apt-9	Unassigned: regulated by multiple stresses	26.1087	93.3722	-1.8385	0.00042443	0.024916
WBGene00007541	fipr-4	Stress response: pathogen: NLP-like	102.264	361.602	-1.8221	1.1163e-06	0.00032673
WBGene00015087	B0252.1	Signaling: Y kinase	44.9337	158.884	-1.8221	0.0011134	0.044656
WBGene00014183	ZK1025.3	Transmembrane protein: unassigned	291.39	1030.3	-1.822	3.6652e-05	0.004532
WBGene00012168	W01A8.6	Proteolysis general: carboxypeptidase	30.4452	107.504	-1.8201	2.3487e-05	0.0033751
WBGene00000372	cyp-13A7	Stress response: detoxification: CYP	10.9303	38.5917	-1.82	0.0010637	0.043558
WBGene00001548	gcy-23	Signaling: heteromeric G protein: guanylyl cyclase	37.4157	132.071	-1.8196	1.3823e-05	0.0022454
WBGene00001769	gst-21	Stress response: detoxification: GST	15.7835	55.6386	-1.8177	0.00058467	0.029714
WBGene00011321	fil-1	Metabolism: lipid: lipase	38.9288	135.866	-1.8033	6.7445e-05	0.0070525
WBGene00001068	dpy-6	Extracellular material: PGI	423.806	1475.29	-1.7995	1.5096e-08	1.0336e-05
WBGene00002055	ifc-1	Cytoskeleton: intermediate filament protein	584.151	2028.4	-1.7959	3.887e-08	2.1173e-05
WBGene00009515	clec-170	Stress response: C-type Lectin	49.8231	172.328	-1.7903	3.3591e-06	0.00075653
WBGene00000402	cdh-10	Cytoskeleton: cadherin	316.55	1093.58	-1.7886	3.059e-08	1.7476e-05
WBGene00017149	EGAP4.1	Unassigned	100.444	346.79	-1.7877	4.5007e-05	0.0052884
WBGene00004255	epac-1	Signaling: small GTPase: Rap	16.4152	56.2178	-1.776	0.0004041	0.024332
WBGene00000730	col-157	Extracellular material: collagen	63.9722	219.063	-1.7758	0.00019913	0.014854
WBGene00008150	mam-2	Unassigned: regulated by multiple stresses	59.885	205.01	-1.7754	4.8119e-06	0.00098868
WBGene00018074	F35H12.1	Unassigned	14.5772	49.7006	-1.7696	0.00086396	0.037685
WBGene00017335	F10D2.10	Unassigned: regulated by multiple stresses	44.6142	151.869	-1.7673	1.2152e-05	0.0020776
WBGene00017331	ugt-40	Stress response: detoxification: ugt	43.9997	149.761	-1.7671	6.9986e-06	0.0013437
WBGene00004230	ptr-16	Signaling: hedgehog-like	127.235	432.902	-1.7665	1.1354e-06	0.00032673
WBGene00022024	Y64H9A.2	Unassigned: regulated by multiple stresses	47.6334	161.889	-1.765	7.7964e-06	0.0014628
WBGene00022339	Y82E9BR.6	Unassigned	46.4176	157.207	-1.7599	0.0001108	0.0099332
WBGene00007543	fipr-7	Unassigned: regulated by multiple stresses	21.3498	72.2443	-1.7587	0.00027556	0.01822
WBGene00008509	F01G10.6	Unassigned	26.2875	88.9347	-1.7584	8.6074e-05	0.008331
WBGene00017375	pbo-6	Transmembrane transport: ion channel	13.2878	44.7781	-1.7527	0.00052658	0.028032
WBGene00006456	tag-83	NA	29.1839	98.2412	-1.7512	9.9733e-05	0.0093442
WBGene00004144	pqn-60	Development: apoptosis	89.8243	302.302	-1.7508	0.00037556	0.02321
WBGene00020605	lgc-50	Transmembrane transport: extracellular ligand gated channel	72.87	245.082	-1.7499	1.9398e-06	0.00048335
WBGene00001762	gst-14	Stress response: oxidative	20.2811	67.5145	-1.7351	0.0010503	0.043313
WBGene00022680	ZK180.6	Unassigned: regulated by multiple stresses	400.06	1331.11	-1.7343	2.3889e-07	9.8167e-05
WBGene00021389	Y38A10A.2	Unassigned	41.7394	138.827	-1.7338	0.00022845	0.016364
WBGene00018283	sulp-3	Transmembrane transport: sulfate	21.6682	71.8193	-1.7288	0.0003714	0.023014
WBGene00018871	F55C12.4	Transmembrane protein: unassigned	25.9283	85.7791	-1.7261	0.00018303	0.013982
WBGene00008746	F13E6.2	Metabolism: nucleotide	34.5379	113.965	-1.7223	0.00013665	0.011472
WBGene00001067	dpy-5	Extracellular material: collagen	1878.1	6172.23	-1.7165	1.6807e-07	7.7192e-05
WBGene00021002	W03F9.4	Metabolism: lipid: beta oxidation	68.0533	223.403	-1.7149	4.0539e-06	0.00087922
WBGene00008449	E01G6.1	Proteolysis general: inhibitor: serine	174.459	569.968	-1.708	1.4297e-06	0.00038553
WBGene00045416	Y37H2A.14	Transmembrane protein: unassigned	84.4977	275.967	-1.7075	6.5439e-07	0.00020713
WBGene00008500	F01D5.10	Extracellular material: chondroitin sulfotransferase	27.6795	90.3222	-1.7063	0.00034872	0.021666
WBGene00007097	B0024.4	Stress response: pathogen: unassigned	67.5318	219.528	-1.7008	5.2464e-06	0.0010503
WBGene00012648	Y39A1A.9	Unassigned	288.023	933.821	-1.697	0.00064677	0.031495
WBGene00010033	F54B11.10	Unassigned: regulated by multiple stresses	21.6438	69.9506	-1.6924	0.00023116	0.016457
WBGene00012456	Y17D7C.2	Unassigned	15.5856	50.3242	-1.691	0.00094062	0.039841
WBGene00018616	F48G7.5	Unassigned: regulated by multiple stresses	33.279	107.413	-1.6905	0.00010973	0.0099234
WBGene00015519	doxa-1	Transmembrane protein: unassigned	52.987	170.281	-1.6842	1.437e-05	0.0023054
WBGene00007938	C34F6.1	Proteolysis general: inhibitor: serine	191.022	612.917	-1.682	1.3464e-05	0.0022053
WBGene00006950	wrt-4	Signaling: hedgehog-like	111.228	356.686	-1.6811	1.9854e-06	0.00048952
WBGene00019901	R05G6.9	Signaling: Notch	30.4809	97.4415	-1.6766	0.00015263	0.012209
WBGene00000699	col-125	Extracellular material: collagen	2447.18	7804.95	-1.6733	3.7569e-07	0.0001375
WBGene00019550	K09C4.5	Transmembrane transport: solute carrier	113.727	361.386	-1.668	0.00043086	0.025038
WBGene00014077	ZK792.4	Unassigned	45.9796	145.967	-1.6666	1.6447e-05	0.0025345
WBGene00022103	cdh-12	Cytoskeleton: cadherin	818.339	2597.53	-1.6664	1.747e-07	7.8692e-05
WBGene00010760	K10H10.4	Unassigned: regulated by multiple stresses	24.5049	77.6695	-1.6643	0.00049598	0.026916
WBGene00000601	col-12	Extracellular material: collagen	186.181	589.904	-1.6638	1.1781e-05	0.0020441
WBGene00022645	ZK6.11	Stress response: pathogen: unassigned	1902.9	6029.46	-1.6638	2.3321e-07	9.8167e-05
WBGene00044630	bus-17	Extracellular material: PGI	42.519	134.548	-1.6619	0.00060783	0.030356
WBGene00006620	svh-1	Proteolysis general: unassigned	34.5874	109.255	-1.6594	4.7305e-05	0.005405
WBGene00006068	sto-6	Transmembrane transport: unassigned	22.971	72.5147	-1.6585	0.0010952	0.044205
WBGene00001399	fat-7	Metabolism: lipid: fatty acid	202.577	638.142	-1.6554	1.5789e-06	0.00041552
WBGene00000618	col-41	Extracellular material: collagen	1759.55	5536.89	-1.6539	3.5891e-07	0.0001349
WBGene00000665	col-90	Extracellular material: collagen	1049.23	3300.21	-1.6532	0.001197	0.046885
WBGene00001703	grd-14	Signaling: hedgehog-like	157.795	495.534	-1.6509	0.0010775	0.043958
WBGene00005017	sqt-2	Extracellular material: collagen	1062.57	3334.66	-1.65	0.0011496	0.045795
WBGene00007537	fipr-8	Stress response: pathogen: NLP-like	30.7197	96.3913	-1.6497	0.00071713	0.033798
WBGene00006765	unc-29	Transmembrane transport: nicotinic acid receptor	31.7747	99.6945	-1.6496	0.00047386	0.026116
WBGene00020587	ugt-9	Stress response: detoxification: ugt	156.658	490.532	-1.6467	1.6124e-06	0.00041964
WBGene00010032	F54B11.9	Unassigned	37.074	115.915	-1.6446	0.00059646	0.03011
WBGene00000606	col-17	Extracellular material: collagen	3047.09	9476.59	-1.6369	0.00044386	0.025358
WBGene00010745	dod-17	Stress response: pathogen: CUB	189.214	588.331	-1.6366	1.6418e-06	0.00042259
WBGene00044623	bus-8	Extracellular material: PGI	373.076	1156.11	-1.6317	0.00018524	0.014087
WBGene00007875	dod-24	Stress response: pathogen: unassigned	599.093	1856.22	-1.6315	5.3507e-07	0.00018647
WBGene00020281	T06A4.1	Proteolysis general: carboxypeptidase	70.2151	217.553	-1.6315	1.7421e-05	0.0026671
WBGene00008477	clec-17	Stress response: C-type Lectin	157.27	486.501	-1.6292	2.9127e-05	0.0038912
WBGene00009730	myo-6	Muscle function	477.905	1478.3	-1.6291	1.2434e-06	0.0003509
WBGene00015103	B0280.7	Unassigned	48.2906	149.281	-1.6282	0.00029604	0.019102
WBGene00022274	Y73E7A.8	Unassigned	199.693	616.47	-1.6262	7.966e-05	0.0080426
WBGene00000704	col-130	Extracellular material: collagen	230.799	712.179	-1.6256	3.7836e-06	0.00082827
WBGene00004264	qua-1	Signaling: hedgehog-like	1014.64	3130.59	-1.6255	4.6436e-05	0.005358
WBGene00011285	ttr-28	Unassigned: TransThyretin-Related family domain	21.7472	66.687	-1.6166	0.00080096	0.035892
WBGene00004998	spp-13	Stress response: pathogen: saposin	71.3803	217.748	-1.6091	0.00070066	0.033155
WBGene00000616	col-39	Extracellular material: collagen	1092.52	3327.29	-1.6067	2.666e-06	0.00061827
WBGene00001730	grl-21	Signaling: hedgehog-like	85.4487	259.987	-1.6053	0.00041808	0.024812
WBGene00004224	ptr-10	Signaling: hedgehog-like	96.3389	292.585	-1.6027	6.0666e-06	0.0011941
WBGene00044463	W09G12.10	Transmembrane protein: unassigned	28.9798	87.8309	-1.5997	0.00053306	0.028249
WBGene00017998	F33D4.6	Unassigned: regulated by multiple stresses	337.907	1023.12	-1.5983	4.7769e-06	0.00098868
WBGene00020242	phat-5	Unassigned	172.118	520.824	-1.5974	0.00066836	0.032058
WBGene00006584	tni-1	Muscle function	1342.73	4052.92	-1.5938	0.0011648	0.046166
WBGene00017835	F26F12.4	Transmembrane protein: seven transmembrane receptor: unassigned	45.3432	136.722	-1.5923	0.0006041	0.0303
WBGene00219208	B0365.9	Unassigned	63.1862	190.424	-1.5915	2.2057e-05	0.0032494
WBGene00018487	F46C8.8	Unassigned: regulated by multiple stresses	120.823	363.737	-1.59	0.00088515	0.038252
WBGene00017438	F13H8.5	Unassigned	195.397	587.703	-1.5887	0.00013099	0.011157
WBGene00004300	ram-2	Extracellular material: collagen	2510.94	7549.78	-1.5882	1.0102e-06	0.00030336
WBGene00019756	M03E7.4	Extracellular material: PGI	42.4731	127.708	-1.5882	0.0011715	0.04634
WBGene00021326	Y34B4A.10	Unassigned: regulated by multiple stresses	81.6715	245.53	-1.588	2.8254e-05	0.0038034
WBGene00000039	acn-1	Development: somatic	797.497	2384.98	-1.5804	1.1438e-06	0.00032673
WBGene00017013	ensh-1	Cytoskeleton: unassigned	33.1037	98.9976	-1.5804	0.00018084	0.013933
WBGene00004397	rol-6	Extracellular material: collagen	1203.49	3592.88	-1.5779	0.00015889	0.012573
WBGene00018639	tbc-16	Stress response: unassigned	52.6142	157.01	-1.5773	0.00024855	0.017005
WBGene00001071	dpy-9	Extracellular material: collagen	427.206	1273.75	-1.5761	3.748e-05	0.0045964
WBGene00019148	H03E18.1	Unassigned: regulated by multiple stresses	407.91	1211.8	-1.5708	2.5437e-06	0.00059581
WBGene00009094	F23H12.5	Unassigned	246.711	732.731	-1.5705	0.00057429	0.029471
WBGene00001612	glr-1	Transmembrane transport: glutamate channel	32.6927	97.062	-1.5699	0.00029554	0.019102
WBGene00001429	fkb-4	Chaperone: cyclophilin	90.2184	267.443	-1.5677	1.3441e-05	0.0022053
WBGene00007672	fbxa-136	Proteolysis proteasome: E3: F box	30.9803	91.7701	-1.5667	0.00029802	0.019177
WBGene00007344	C05E7.2	Proteolysis general: unassigned	72.0981	213.55	-1.5665	4.0271e-05	0.0048196
WBGene00002067	ifp-1	Cytoskeleton: intermediate filament protein	500.327	1480.63	-1.5653	8.3945e-06	0.0015361
WBGene00006064	sto-2	Transmembrane transport: unassigned	20.9393	61.7998	-1.5614	0.00090363	0.038694
WBGene00016340	gba-2	Metabolism: lipid: sphingolipid	40.2893	118.714	-1.559	0.00010412	0.0096398
WBGene00011545	T06G6.3	Unassigned	28.6794	84.2884	-1.5553	0.0013017	0.049031
WBGene00017060	D2063.1	Metabolism: short chain dehydrogenase	37.2259	109.224	-1.5529	0.00046873	0.026016
WBGene00018418	F44E2.4	Transmembrane protein: unassigned	554.385	1624.37	-1.5509	0.00075536	0.03476
WBGene00017577	F18F11.4	Unassigned: Glycosyltransferase family A	31.9185	93.5007	-1.5506	0.00053902	0.028437
WBGene00008333	C55A6.4	Metabolism: short chain dehydrogenase	67.2516	196.545	-1.5472	2.3815e-05	0.0034013
WBGene00004124	pqn-37	Unassigned: prion domain	77.5451	226.538	-1.5466	0.00043338	0.025064
WBGene00010058	F54E4.2	Transmembrane protein: seven transmembrane receptor: unassigned	29.7057	86.7427	-1.546	0.00074721	0.034682
WBGene00000702	col-128	Extracellular material: collagen	61.3002	178.852	-1.5448	3.4688e-05	0.0043683
WBGene00004219	ptr-4	Signaling: hedgehog-like	662.604	1929.49	-1.542	1.8388e-06	0.00046816
WBGene00019154	glf-1	Metabolism: carbohydrate	392.791	1143.79	-1.542	3.9767e-05	0.0048196
WBGene00012947	Y47H9C.1	Unassigned: regulated by multiple stresses	59.7792	174.061	-1.5419	2.9673e-05	0.0039047
WBGene00006747	unc-7	Cytoskeleton: innexin	124.272	359.174	-1.5312	7.9703e-06	0.00147
WBGene00010128	F55G11.8	Stress response: pathogen: CUB	153.145	442.139	-1.5296	5.2843e-05	0.0058661
WBGene00012939	Y47D3B.1	Transmembrane protein: unassigned	91.8726	265.229	-1.5295	0.00041764	0.024812
WBGene00012437	hum-9	Muscle function	188.286	543.421	-1.5291	6.9558e-06	0.0013437
WBGene00001066	dpy-4	Extracellular material: collagen	2584.28	7438.02	-1.5252	0.00050797	0.027227
WBGene00006749	unc-9	Cytoskeleton: innexin	173.919	500.216	-1.5241	6.2446e-06	0.0012189
WBGene00017991	clec-180	Stress response: C-type Lectin	310.69	893.471	-1.5239	0.00012446	0.010639
WBGene00011107	R07E3.6	Unassigned	337.014	968.551	-1.523	2.2241e-05	0.003256
WBGene00019236	H23N18.5	Signaling: lipid: phospholipase A	68.1136	195.653	-1.5223	0.00011096	0.0099332
WBGene00000934	dat-1	Neuronal function: synaptic function: transporter	34.5851	99.3413	-1.5222	0.00049641	0.026916
WBGene00020887	T28B4.4	Cytoskeleton: claudin	104.087	298.669	-1.5208	1.9971e-05	0.0029986
WBGene00009432	cld-9	Stress response: pathogen: unassigned	178.74	512.567	-1.5199	0.00062313	0.030728
WBGene00003482	mua-3	Extracellular material: matrix	1633.2	4682.98	-1.5197	0.0010549	0.043412
WBGene00020554	T19A5.3	Development: somatic	284.158	814.547	-1.5193	1.464e-05	0.0023121
WBGene00003526	nas-7	Proteolysis general: metallopeptidase	69.4438	198.649	-1.5163	8.2915e-05	0.0082033
WBGene00018969	F56D3.1	Unassigned: regulated by multiple stresses	525.058	1496.68	-1.5112	0.0004804	0.026414
WBGene00021625	Y47D7A.13	Unassigned	2474.99	7050.78	-1.5104	0.00010724	0.0098117
WBGene00001063	dpy-1	Extracellular material: cuticlin	250.554	713.408	-1.5096	1.5475e-05	0.0024164
WBGene00001725	grl-16	Signaling: hedgehog-like	1197.95	3404.26	-1.5068	0.00017331	0.013576
WBGene00022611	ZC449.1	Unassigned	64.964	184.48	-1.5058	0.00056185	0.029219
WBGene00013950	ZK262.3	Unassigned: hydrolase	66.5162	188.386	-1.5019	6.4125e-05	0.0067964
WBGene00007041	tag-180	Transmembrane transport: calcium channel	108.702	307.426	-1.4999	5.908e-05	0.0064066
WBGene00002393	lpr-1	Transmembrane transport: lipid	42.8488	121.17	-1.4997	0.00077304	0.035227
WBGene00004777	ser-2	Signaling: heteromeric G protein: receptor	25.6082	72.126	-1.4939	0.00067209	0.032127
WBGene00000069	acy-2	Signaling: heteromeric G protein: adenylyl cyclase	29.9246	84.0657	-1.4902	0.00059505	0.030103
WBGene00015993	C18H7.1	Unassigned: regulated by multiple stresses	231.564	650.227	-1.4895	9.9517e-06	0.0017659
WBGene00013173	Y53F4B.27	Unassigned: regulated by multiple stresses	143.58	402.814	-1.4883	2.7191e-05	0.0037457
WBGene00000720	col-147	Extracellular material: collagen	2073.03	5814.19	-1.4878	6.0848e-05	0.0065378
WBGene00021304	nphp-2	Cilia: unassigned	41.4137	116.008	-1.486	0.00026426	0.017685
WBGene00001690	grd-1	Signaling: hedgehog-like	118.673	332.309	-1.4855	3.6367e-05	0.004531
WBGene00011880	T21B6.3	Unassigned: prion domain	1467.47	4106.39	-1.4845	3.6619e-06	0.00080918
WBGene00018737	F53B1.4	Metabolism: unassigned	323.678	905.174	-1.4836	1.1912e-05	0.0020516
WBGene00004232	ptr-18	Signaling: hedgehog-like	432.987	1209.07	-1.4815	0.00028148	0.018468
WBGene00022517	ZC123.1	Unassigned	372.059	1038.56	-1.481	8.4935e-06	0.0015422
WBGene00009620	fip-5	Unassigned: regulated by multiple stresses	134.509	375.354	-1.4805	2.1439e-05	0.0031846
WBGene00007999	tag-297	Unassigned	363.344	1012.65	-1.4787	0.00010265	0.009576
WBGene00018468	tag-80	Signaling: unassigned	212.872	592.218	-1.4761	9.8683e-06	0.0017645
WBGene00012634	Y38H6C.23	Unassigned	58.0706	161.486	-1.4755	0.00014647	0.012038
WBGene00015137	B0310.1	Transmembrane protein: unassigned	97.4788	270.807	-1.4741	6.334e-05	0.0067605
WBGene00008482	cut-4	Extracellular material: cuticlin	29.1945	80.9947	-1.4721	0.0012204	0.047482
WBGene00017018	D1014.5	Transmembrane protein: unassigned	150.64	417.877	-1.472	3.331e-05	0.0042175
WBGene00020052	R13A5.10	Metabolism: nucleotide	93.0182	257.94	-1.4715	5.8952e-05	0.0064066
WBGene00011235	suro-1	Proteolysis general: carboxypeptidase	376.097	1040.75	-1.4685	1.2634e-05	0.0021442
WBGene00022591	cuti-1	Transmembrane protein: unassigned	157.02	433.615	-1.4655	0.00046144	0.025757
WBGene00001768	gst-20	Stress response: detoxification: GST	321.961	887.549	-1.4629	1.1617e-05	0.0020307
WBGene00007868	C32H11.5	Unassigned	50.7804	139.681	-1.4598	0.00025383	0.017184
WBGene00006811	unc-79	Transmembrane transport: calcium channel	200.275	550.733	-1.4594	2.8013e-05	0.0037928
WBGene00009983	cut-2	Extracellular material: cuticlin	2291.83	6298.19	-1.4584	0.00066928	0.032058
WBGene00008652	F10D11.6	Development: general	809.246	2222.75	-1.4577	1.4626e-05	0.0023121
WBGene00018732	F53A9.9	Unassigned: regulated by multiple stresses	68.4385	187.321	-1.4526	8.3872e-05	0.0082544
WBGene00004912	sng-1	Neuronal function: synaptic function: vesicle trafficking	66.0402	180.287	-1.4489	0.00016727	0.013147
WBGene00006681	twk-29	Transmembrane transport: potassium channel	41.9391	114.368	-1.4473	0.00034142	0.021325
WBGene00012032	T26C5.2	Unassigned: regulated by multiple stresses	217.341	588.933	-1.4381	0.0005626	0.029219
WBGene00015620	C08G9.2	Proteolysis general: unassigned	80.1249	216.828	-1.4362	0.00015273	0.012209
WBGene00004218	ptr-3	Signaling: hedgehog-like	69.2823	187.445	-1.4359	0.0001096	0.0099234
WBGene00009090	fipr-3	Transmembrane protein: unassigned	56.7975	153.555	-1.4349	0.00032878	0.020646
WBGene00011339	T01G5.1	Signaling: Y kinase	110.379	298.242	-1.434	8.0355e-05	0.0080434
WBGene00000681	col-107	Extracellular material: collagen	2403.77	6477.82	-1.4302	1.1467e-05	0.0020195
WBGene00015645	lips-7	Metabolism: lipid: lipase	46.5826	125.198	-1.4263	0.00083679	0.036842
WBGene00010157	oac-34	Metabolism: lipid: o-acyl transferase	47.5038	127.433	-1.4236	0.00050601	0.027184
WBGene00077521	maf-1	Transcription factor: bZIP	41.5449	111.438	-1.4235	0.00044322	0.025358
WBGene00004127	abu-12	Unassigned: prion domain	162.619	434.476	-1.4178	0.00025194	0.017105
WBGene00000678	col-104	Extracellular material: collagen	453.159	1210.66	-1.4177	3.0142e-05	0.0039419
WBGene00003959	pcp-4	Proteolysis general: serine	317.739	847.596	-1.4155	3.1556e-05	0.0040611
WBGene00004910	snf-11	Transmembrane transport: GABA	256.573	684.197	-1.415	2.7346e-05	0.0037457
WBGene00006777	unc-41	Neuronal function: unassigned	268.811	715.721	-1.4128	1.39e-05	0.0022454
WBGene00003171	mec-7	Cytoskeleton: microtubule: tubulin	363.35	966.67	-1.4117	1.7633e-05	0.002682
WBGene00012429	Y11D7A.5	Unassigned	34.0491	90.5422	-1.411	0.0012885	0.048971
WBGene00020895	T28D9.3	Signaling: lipid: phosphatase	211.607	562.621	-1.4108	2.9238e-05	0.0038912
WBGene00019660	K11H12.4	Unassigned: regulated by multiple stresses	86.5217	229.774	-1.4091	0.00013217	0.011217
WBGene00012433	Y11D7A.9	Stress response: unassigned	138.822	368.319	-1.4077	0.0012448	0.047868
WBGene00006886	vap-1	Extracellular material: secreted protein	223.002	590.167	-1.4041	1.3136e-05	0.0021822
WBGene00007126	dhcr-7	Metabolism: lipid: sterol	54.6517	144.225	-1.4	0.00029284	0.019053
WBGene00011018	R05A10.1	Unassigned	166.649	439.735	-1.3998	0.0013062	0.049031
WBGene00005655	srr-4	Transmembrane protein: seven transmembrane receptor: srr	384.572	1012.95	-1.3972	4.6116e-05	0.0053474
WBGene00013846	ZC84.1	Proteolysis general: inhibitor: serine	68.9028	181.317	-1.3959	0.00039138	0.023873
WBGene00010225	ttr-31	Unassigned: regulated by multiple stresses	230.967	607.63	-1.3955	3.6762e-05	0.004532
WBGene00017937	F30H5.3	Proteolysis general: serine	1203.47	3163.89	-1.3945	0.00022167	0.016026
WBGene00003408	mrp-2	Transmembrane transport: ABC	516.595	1357.85	-1.3942	1.3078e-05	0.0021822
WBGene00004231	ptr-17	Signaling: hedgehog-like	50.9683	133.789	-1.3923	0.00055834	0.029127
WBGene00022679	ZK180.5	Unassigned: regulated by multiple stresses	3199.16	8397.84	-1.3923	4.9069e-05	0.0055257
WBGene00022180	Y71H2AM.15	Signaling: Y kinase	263.076	689.953	-1.391	5.1108e-05	0.0057278
WBGene00007210	agmo-1	Metabolism: lipid: unassigned	149.199	391.239	-1.3908	8.2109e-05	0.008184
WBGene00011763	T14B1.1	Unassigned	834.287	2185.63	-1.3894	9.7705e-06	0.0017604
WBGene00013711	Y106G6G.2	Signaling: small GTPase: ARF	55.7933	145.598	-1.3838	0.00041767	0.024812
WBGene00011831	T19B10.2	Unassigned	1248.86	3251.75	-1.3806	4.8919e-05	0.0055257
WBGene00007687	C18E9.7	Unassigned: regulated by multiple stresses	96.2687	250.22	-1.3781	0.00017878	0.01382
WBGene00006750	unc-10	Neuronal function: synaptic function: unassigned	215.607	560.394	-1.378	4.5382e-05	0.0052884
WBGene00019759	M03F4.6	Unassigned	105.466	273.313	-1.3738	0.00024386	0.0169
WBGene00015841	skpo-2	Unassigned	229.296	592.615	-1.3699	0.0012438	0.047868
WBGene00017193	F07C3.2	Transmembrane protein: unassigned	94.8602	244.435	-1.3656	0.0001496	0.012167
WBGene00020774	T24E12.5	Unassigned: membrane spanning domain	47.9205	123.293	-1.3634	0.00041806	0.024812
WBGene00008997	lgc-31	Transmembrane transport: extracellular ligand gated channel	48.2384	123.913	-1.3611	0.00090834	0.038825
WBGene00000746	col-173	Extracellular material: collagen	122.104	313.643	-1.361	0.00015126	0.012209
WBGene00019346	K02G10.5	Transmembrane transport: solute carrier	52.8656	135.77	-1.3608	0.00075071	0.034682
WBGene00020490	tmc-1	Transmembrane transport: sodium channel	196.664	504.59	-1.3594	7.0765e-05	0.0073019
WBGene00000641	col-65	Extracellular material: collagen	567.595	1454.73	-1.3578	9.5792e-05	0.0091852
WBGene00015646	mlt-10	Development: somatic	480.569	1231.4	-1.3575	0.00026681	0.017754
WBGene00006845	unc-122	Neuronal function: synaptic function: unassigned	50.8811	130.291	-1.3565	0.00074775	0.034682
WBGene00000719	col-146	Extracellular material: collagen	178.91	457.824	-1.3556	0.00012371	0.010614
WBGene00011895	T21C9.9	Unassigned: regulated by multiple stresses	110.756	283.035	-1.3536	0.00021972	0.015967
WBGene00020550	T17H7.1	Unassigned	233.21	595.269	-1.3519	3.5201e-05	0.0044091
WBGene00020735	T23F2.2	Metabolism: mitochondria: cytochrome c oxidase assembly factor	188.588	481.199	-1.3514	9.651e-05	0.0091852
WBGene00022160	Y71G12B.25	Transmembrane transport: major facilitator	304.841	777.355	-1.3505	4.2268e-05	0.0050002
WBGene00020012	R11G1.6	Transmembrane protein: seven transmembrane receptor: unassigned	448.586	1143.61	-1.3501	2.7806e-05	0.0037866
WBGene00006363	syd-1	Neuronal function: synaptic function: GTPase function	101.19	257.529	-1.3477	0.00057168	0.02943
WBGene00013540	Y75B8A.3	Unassigned: hydrolase	95.8235	243.664	-1.3464	0.00021498	0.015687
WBGene00008712	F11E6.9	Unassigned	71.5094	181.727	-1.3456	0.00030666	0.019519
WBGene00077701	poml-3	Stress response: unassigned	132.15	335.822	-1.3455	6.3498e-05	0.0067605
WBGene00004854	slt-1	Extracellular material: matrix	274.745	696.714	-1.3425	6.7217e-05	0.0070525
WBGene00004719	sad-1	Neuronal function: synaptic function: unassigned	185.268	469.513	-1.3416	6.8488e-05	0.0071298
WBGene00012186	mlt-11	Unassigned	3536.01	8958.15	-1.3411	2.1482e-05	0.0031846
WBGene00010673	K08E7.5	Unassigned: regulated by multiple stresses	199.594	505.626	-1.341	8.8898e-05	0.008569
WBGene00016093	srsx-34	Transmembrane transport: major facilitator	133.11	337.015	-1.3402	7.5627e-05	0.0076685
WBGene00001158	ech-9	Metabolism: lipid: beta oxidation	45.8289	115.993	-1.3397	0.00074996	0.034682
WBGene00001753	gst-5	Stress response: detoxification: GST	572.031	1445.52	-1.3374	2.6056e-05	0.0036371
WBGene00010123	F55G11.2	Stress response: pathogen: CUB	237.425	599.224	-1.3356	0.00012299	0.010591
WBGene00003527	nas-8	Proteolysis general: metallopeptidase	49.347	124.483	-1.3349	0.00095231	0.040191
WBGene00020836	lgc-34	Transmembrane transport: extracellular ligand gated channel	285.168	718.286	-1.3327	5.7313e-05	0.0063026
WBGene00003178	mec-17	Cytoskeleton: microtubule: tubulin modification	259.831	652.788	-1.329	6.6066e-05	0.0069706
WBGene00013949	ZK262.2	Unassigned	57.229	143.447	-1.3257	0.0004834	0.026517
WBGene00017297	F09E10.7	Unassigned	81.5734	204.227	-1.324	0.00022994	0.016421
WBGene00020283	T06A4.3	Proteolysis general: carboxypeptidase	152.315	381.044	-1.3229	0.00017597	0.013648
WBGene00013852	hhat-1	Signaling: hedgehog-like	142.883	356.553	-1.3193	0.00066863	0.032058
WBGene00004226	ptr-12	Signaling: hedgehog-like	193.709	482.893	-1.3178	0.00011158	0.0099332
WBGene00044620	bus-4	Protein modification: carbohydrate	70.9582	176.786	-1.317	0.001234	0.047776
WBGene00011590	bus-19	Transmembrane protein: unassigned	182.896	455.157	-1.3153	0.00049523	0.026916
WBGene00020394	T10B5.8	Unassigned	54.9314	136.65	-1.3148	0.0012371	0.047815
WBGene00008583	ugt-65	Stress response: detoxification: ugt	86.4737	214.463	-1.3104	0.00038394	0.02348
WBGene00021213	Y18H1A.9	Proteolysis general: carboxypeptidase	88.2127	218.627	-1.3094	0.00050582	0.027184
WBGene00009865	F49B2.6	Proteolysis general: metallopeptidase	171.135	424.124	-1.3093	0.00017522	0.013635
WBGene00003762	nlp-24	Neuronal function: synaptic function: neuropeptide	1547.75	3834.82	-1.309	8.0268e-05	0.0080434
WBGene00006820	unc-89	Muscle function	5026.55	12438.8	-1.3072	0.00023855	0.016779
WBGene00007177	oac-1	Metabolism: lipid: o-acyl transferase	65.3763	161.701	-1.3065	0.00090262	0.038694
WBGene00000284	cah-6	Metabolism: unassigned	124.871	308.837	-1.3064	0.00019385	0.0146
WBGene00044260	Y87G2A.19	Transmembrane protein: unassigned	169.884	419.227	-1.3032	0.00042718	0.024952
WBGene00010742	K10D6.2	Cytoskeleton: claudin	362.722	893.886	-1.3012	0.00092136	0.039167
WBGene00017463	F14D12.1	Unassigned: regulated by multiple stresses	70.2526	173.095	-1.3009	0.00074444	0.034666
WBGene00020571	lpr-7	Transmembrane transport: lipid	80.5856	198.149	-1.298	0.00078209	0.03557
WBGene00021528	gbb-1	Neuronal function: synaptic function: neurotransmitter receptor	167.997	412.79	-1.297	0.00040351	0.024332
WBGene00020365	T08G2.2	Transmembrane protein: unassigned	44.9025	110.211	-1.2954	0.0010317	0.042845
WBGene00022504	mam-1	Unassigned	57.8901	141.268	-1.287	0.0010718	0.043811
WBGene00022100	Y69A2AR.31	Transmembrane protein: unassigned	202.804	494.712	-1.2865	0.00014086	0.011706
WBGene00001059	dpf-6	Proteolysis general: serine	148.978	363.395	-1.2864	0.00011656	0.010225
WBGene00012289	W05H12.1	Transmembrane protein: unassigned	348.244	847.149	-1.2825	7.3175e-05	0.0074846
WBGene00022675	gbb-2	Neuronal function: synaptic function: neurotransmitter receptor	173.893	422.029	-1.2791	0.00020466	0.01517
WBGene00004267	rab-3	Neuronal function: synaptic function: GTPase function	290.459	704.594	-1.2785	0.0010259	0.042682
WBGene00000942	deb-1	Cytoskeleton: unassigned	2312.23	5603.07	-1.2769	0.00020956	0.015339
WBGene00004123	pqn-36	Unassigned: prion domain	169.684	411.029	-1.2764	0.00024328	0.0169
WBGene00006424	ctbp-1	Transcription: unassigned	143.148	346.043	-1.2734	0.00027415	0.018191
WBGene00004921	snt-1	Neuronal function: synaptic function: vesicle trafficking	252.194	609.423	-1.2729	9.633e-05	0.0091852
WBGene00020846	T27A10.6	Unassigned	380.578	918.797	-1.2716	7.1411e-05	0.0073363
WBGene00004830	slo-1	Transmembrane transport: potassium channel	287.978	693.618	-1.2682	0.00014426	0.011925
WBGene00008512	F01G10.10	Metabolism: lipid: binding	101.011	242.928	-1.266	0.00076719	0.035029
WBGene00001819	haf-9	Transmembrane transport: ABC	1053.36	2530.91	-1.2647	7.3586e-05	0.0074939
WBGene00017376	F11C7.2	Unassigned	104.802	251.73	-1.2642	0.00056846	0.029393
WBGene00010714	mam-3	Unassigned: regulated by multiple stresses	68.5516	164.625	-1.2639	0.0013214	0.049523
WBGene00020049	ttr-8	Unassigned	97.0949	233.008	-1.2629	0.00047215	0.026083
WBGene00015954	C18B2.3	Unassigned	398.976	955.743	-1.2603	0.00042385	0.024916
WBGene00002233	kqt-1	Transmembrane transport: potassium channel	94.7255	226.78	-1.2595	0.00085125	0.037339
WBGene00002243	lad-2	Transmembrane protein: unassigned	126.114	300.342	-1.2519	0.00030128	0.01926
WBGene00006756	unc-17	NA	118.592	282.083	-1.2501	0.00044659	0.025402
WBGene00001116	dyc-1	Metabolism: unassigned	215.096	511.444	-1.2496	0.00027614	0.01822
WBGene00012125	T28D6.5	Transmembrane protein: unassigned	320.25	758.985	-1.2449	0.00010665	0.0097961
WBGene00001099	dsc-4	Metabolism: lipid: binding	1104.25	2616.64	-1.2446	0.00063588	0.03116
WBGene00006633	tsp-7	Extracellular material: PGI	54.9209	130.123	-1.2444	0.0012033	0.04699
WBGene00045387	K09H9.8	Transmembrane protein: unassigned	130.238	308.518	-1.2442	0.00029933	0.019209
WBGene00018031	F35B3.4	Unassigned: regulated by multiple stresses	102.603	243.04	-1.2441	0.0012921	0.048971
WBGene00018393	msra-1	Metabolism: 1CC: unassigned	2437.96	5774.4	-1.244	0.00050134	0.027057
WBGene00015298	C01F1.3	Metabolism: nucleotide	441.456	1045.34	-1.2436	8.4406e-05	0.0082721
WBGene00006666	twk-11	Transmembrane transport: potassium channel	107.86	254.397	-1.2379	0.00086782	0.037782
WBGene00004004	pgp-10	Transmembrane transport: ABC	209.938	494.844	-1.237	0.00015683	0.012494
WBGene00022644	dod-19	Stress response: pathogen: unassigned	3554.53	8377.51	-1.2369	4.7291e-05	0.005405
WBGene00006762	unc-25	Neuronal function: synaptic function: neurotransmitter metabolism	406.395	956.634	-1.2351	0.00013394	0.011326
WBGene00018215	igcm-1	Transmembrane protein: unassigned	235.849	554.534	-1.2334	0.00042587	0.024938
WBGene00011844	T19C9.8	Stress response: pathogen: CUB	75.5967	177.7	-1.233	0.00052602	0.028032
WBGene00000667	col-92	Extracellular material: collagen	317.72	746.62	-1.2326	0.00011825	0.010297
WBGene00017968	skpo-3	Unassigned	370.295	866.7	-1.2269	0.00015029	0.012181
WBGene00000783	cpr-3	Stress response: pathogen: unassigned	198.226	463.467	-1.2253	0.00023979	0.016817
WBGene00002983	lgx-1	Metabolism: unassigned	372.153	869.696	-1.2246	0.00044348	0.025358
WBGene00003166	mec-2	Neuronal function: unassigned	94.9205	221.326	-1.2214	0.0009742	0.040876
WBGene00006657	twk-2	Transmembrane transport: potassium channel	126.698	295.313	-1.2209	0.00058622	0.029721
WBGene00004349	rgs-6	Signaling: heteromeric G protein: unassigned	151.399	351.714	-1.2161	0.00045356	0.0256
WBGene00009958	madd-4	Signaling: extracellular	282.596	656.184	-1.2154	0.00019378	0.0146
WBGene00020702	T22F7.3	Proteolysis general: unassigned	106.809	247.694	-1.2135	0.00062294	0.030728
WBGene00016996	D1005.2	Metabolism: carbohydrate	120.446	279.273	-1.2133	0.00045526	0.025634
WBGene00017657	F21C10.7	Unassigned: regulated by multiple stresses	1213.36	2803.85	-1.2084	0.00014093	0.011706
WBGene00015933	C17H12.8	Unassigned: regulated by multiple stresses	791.981	1828.07	-1.2068	0.00019901	0.014854
WBGene00017900	F28E10.1	Unassigned	337.344	777.322	-1.2043	0.00028006	0.018427
WBGene00011530	T06D8.10	Unassigned	317.338	730.405	-1.2027	0.0010873	0.044139
WBGene00009800	rrc-1	Signaling: small GTPase: Rho/Rac	131.419	302.269	-1.2017	0.0011561	0.045897
WBGene00001171	egl-2	Transmembrane transport: potassium channel	124.467	286.154	-1.201	0.00076364	0.035003
WBGene00022410	Y97E10C.1	Unassigned	930.376	2138.05	-1.2004	0.00060778	0.030356
WBGene00006468	rhgf-1	Signaling: small GTPase: Rho/Rac	179.854	412.857	-1.1988	0.00043096	0.025038
WBGene00022608	madf-9	Unassigned: regulated by multiple stresses	118.905	272.664	-1.1973	0.0007354	0.034382
WBGene00011055	arrd-14	Signaling: heteromeric G protein: arrestin	260.186	595.034	-1.1934	0.00029165	0.019029
WBGene00000689	col-115	Extracellular material: collagen	140.734	321.797	-1.1932	0.0010144	0.042355
WBGene00020703	T22F7.4	Unassigned	143.772	328.477	-1.192	0.0004607	0.025757
WBGene00001072	dpy-10	Extracellular material: collagen	899.869	2054.68	-1.1911	0.00054994	0.028882
WBGene00003567	ncx-2	Transmembrane transport: solute carrier	2411.53	5504.67	-1.1907	0.00010864	0.0099017
WBGene00006538	tbb-4	Cytoskeleton: microtubule: tubulin	100.961	230.13	-1.1886	0.0010792	0.043958
WBGene00006672	twk-18	Transmembrane transport: potassium channel	451.418	1028.84	-1.1885	0.0002495	0.017005
WBGene00000685	col-111	Extracellular material: collagen	199.986	455.456	-1.1874	0.00061019	0.030409
WBGene00001719	grl-10	Signaling: hedgehog-like	117.042	266.049	-1.1847	0.00091131	0.038881
WBGene00003169	mec-5	Neuronal function: unassigned	288.155	654.944	-1.1845	0.00048585	0.026589
WBGene00002128	inx-6	Cytoskeleton: innexin	181.213	411.489	-1.1832	0.00049881	0.026983
WBGene00011026	R05D7.1	Transmembrane protein: unassigned	178.752	405.899	-1.1832	0.00040809	0.024509
WBGene00016805	C50D2.1	Unassigned: regulated by multiple stresses	176.017	399.519	-1.1826	0.00088713	0.038268
WBGene00015930	C17H12.4	Metabolism: unassigned	303.904	689.154	-1.1812	0.00055797	0.029127
WBGene00012124	T28D6.4	Unassigned	197.697	447.412	-1.1783	0.00045043	0.025546
WBGene00000958	dgk-1	Signaling: lipid: kinase DAG	268.785	608.215	-1.1781	0.0011814	0.046372
WBGene00013007	Y48E1B.8	Transmembrane protein: unassigned	159.388	360.366	-1.1769	0.00075534	0.03476
WBGene00009158	F26E4.3	Proteolysis general: unassigned	467.415	1053.25	-1.1721	0.00028307	0.018521
WBGene00013079	ttr-26	Unassigned: regulated by multiple stresses	415.143	934.727	-1.1709	0.00023211	0.016475
WBGene00003089	ltd-1	Unassigned	270.419	608.156	-1.1692	0.00037902	0.023318
WBGene00006366	sym-1	Extracellular material: PGI	1220.96	2744.34	-1.1684	0.00013635	0.011472
WBGene00004119	pqn-31	Unassigned: prion domain	255.88	575.004	-1.1681	0.0003945	0.023965
WBGene00010593	gsnl-1	Cytoskeleton: unassigned	358.667	801.92	-1.1608	0.00024577	0.016981
WBGene00016108	C25G6.3	Unassigned	66.7369	148.965	-1.1584	0.0011543	0.045897
WBGene00004265	qui-1	Neuronal function: unassigned	138.261	308.183	-1.1564	0.00088926	0.038269
WBGene00006772	unc-36	Transmembrane transport: calcium channel	298.223	664.128	-1.1551	0.00034443	0.021456
WBGene00006978	zig-1	Extracellular material: matrix	183.124	406.49	-1.1504	0.0005822	0.029714
WBGene00006789	unc-54	Muscle function	32443.3	71724.4	-1.1445	0.00024789	0.017005
WBGene00017980	F32B5.7	Muscle function	318.004	702.52	-1.1435	0.00049524	0.026916
WBGene00000397	cdh-5	Cytoskeleton: cadherin	214.334	473.078	-1.1422	0.00080448	0.035892
WBGene00011326	T01D3.1	Unassigned	302.634	666.986	-1.1401	0.00068059	0.032468
WBGene00011095	gana-1	Metabolism: carbohydrate	313.723	691.151	-1.1395	0.00039999	0.024209
WBGene00008486	ugt-44	Stress response: detoxification: ugt	301.307	663.487	-1.1388	0.00062925	0.030964
WBGene00006589	tnt-4	Cytoskeleton: unassigned	1239.02	2725.2	-1.1372	0.00066376	0.032058
WBGene00012796	Y43F4A.1	Proteolysis general: metallopeptidase	146.791	322.799	-1.1369	0.00058377	0.029714
WBGene00003515	myo-3	Muscle function	6176.74	13579.1	-1.1365	0.00063815	0.031206
WBGene00000964	dhp-2	Metabolism: nucleotide	255.933	562.637	-1.1364	0.00043185	0.025038
WBGene00001650	gon-1	Proteolysis general: metallopeptidase	919.405	2012.59	-1.1303	0.00038327	0.02348
WBGene00008584	irg-4	Stress response: pathogen: CUB	1411.83	3083.73	-1.1271	0.00026034	0.017472
WBGene00001430	fkb-5	Chaperone: cyclophilin	496.411	1083.92	-1.1266	0.0004468	0.025402
WBGene00019273	H43E16.1	Transmembrane protein: unassigned	394.035	855.626	-1.1187	0.00019239	0.014583
WBGene00012007	T25B9.1	Metabolism: amino acid: breakdown	229.058	496.296	-1.1155	0.00096623	0.040705
WBGene00009133	bed-3	Nucleic acid: binding: unassigned	237.41	513.743	-1.1137	0.00085	0.037339
WBGene00011768	oac-46	Metabolism: lipid: o-acyl transferase	348.609	752.801	-1.1107	0.0010902	0.044179
WBGene00018576	F47G3.1	Unassigned: regulated by multiple stresses	94.4712	203.779	-1.1091	0.0012913	0.048971
WBGene00003558	nca-2	Transmembrane transport: unassigned	136.956	294.188	-1.103	0.0011314	0.045222
WBGene00003495	mup-2	Muscle function	5014.57	10768.1	-1.1026	0.00045205	0.025576
WBGene00006663	twk-8	Transmembrane transport: potassium channel	256.16	549.99	-1.1024	0.001304	0.049031
WBGene00003165	mec-1	Neuronal function: unassigned	230.147	493.401	-1.1002	0.00083235	0.036785
WBGene00017447	F14B8.5	Transmembrane protein: unassigned	326.864	700.711	-1.1001	0.0007853	0.035648
WBGene00010738	K10D3.4	Proteolysis general: inhibitor: serine	1438.61	3082.88	-1.0996	0.00030177	0.01926
WBGene00018656	F49H12.5	Unassigned: regulated by multiple stresses	670.961	1433.91	-1.0957	0.00057501	0.029471
WBGene00002039	hum-6	Muscle function	692.208	1476.72	-1.0931	0.00061418	0.030543
WBGene00008602	oac-14	Metabolism: lipid: o-acyl transferase	427.95	912.256	-1.092	0.00080384	0.035892
WBGene00022538	ZC190.4	Nucleic acid: binding: unassigned	377.163	802.705	-1.0897	0.00057093	0.02943
WBGene00007807	C29F3.7	Stress response: pathogen: CUB	1064.28	2263.85	-1.0889	0.00079113	0.035795
WBGene00006752	unc-13	Transmembrane transport: unassigned	878.23	1866.39	-1.0876	0.0006356	0.03116
WBGene00017065	D2092.4	Transmembrane protein: ER	446.211	947.173	-1.0859	0.00079355	0.035814
WBGene00018579	acs-16	Metabolism: lipid: fatty acid	117.387	248.831	-1.0839	0.00091557	0.038992
WBGene00001187	egl-19	Transmembrane transport: calcium channel	731.696	1547	-1.0802	0.00079626	0.035867
WBGene00009621	fipr-21	Unassigned: regulated by multiple stresses	1597.19	3350.57	-1.0689	0.00043569	0.025136
WBGene00000083	adt-2	Proteolysis general: metallopeptidase	888.743	1862.97	-1.0678	0.00068751	0.032731
WBGene00004228	ptr-14	Signaling: hedgehog-like	242.805	507.801	-1.0645	0.0010373	0.043004
WBGene00002127	inx-5	Cytoskeleton: innexin	548.933	1147.9	-1.0643	0.0010965	0.044205
WBGene00006767	unc-31	Neuronal function: synaptic function: unassigned	228.806	478.461	-1.0643	0.0011765	0.046372
WBGene00011794	nep-21	Proteolysis general: metallopeptidase	191.444	399.687	-1.0619	0.0012864	0.048971
WBGene00003929	pat-2	Cytoskeleton: integrin	1223.41	2550.36	-1.0598	0.00085852	0.037587
WBGene00019188	H11E01.3	Unassigned	555.643	1146.28	-1.0447	0.0010595	0.043462
WBGene00013884	ZC412.3	Unassigned: regulated by multiple stresses	790.626	1622.79	-1.0374	0.00083144	0.036785
WBGene00020808	clik-1	Unassigned	5244.11	10735.7	-1.0336	0.00073413	0.034382
WBGene00020579	T19D12.4	Stress response: pathogen: unassigned	1230.85	2516.83	-1.032	0.00060123	0.030285
WBGene00003369	mlc-1	Muscle function	6441.32	13162.4	-1.031	0.00081533	0.036169
WBGene00007479	C09F9.2	Transmembrane protein: unassigned	969.773	1969.49	-1.0221	0.00089043	0.038269
WBGene00020471	pho-14	Lysosome: acid phosphatase	1045.38	2120.97	-1.0207	0.0010933	0.044205
WBGene00002050	ifa-1	Cytoskeleton: intermediate filament protein	944.92	1911.47	-1.0164	0.0010124	0.042344
WBGene00002258	lbp-6	Metabolism: lipid: binding	3250.16	6541.09	-1.009	0.0012466	0.047868
WBGene00002348	myo-1	Muscle function	5230.6	10450.3	-0.99849	0.0012496	0.047905
WBGene00021128	W10C8.5	Metabolism: creatine kinase	1291.33	2560.87	-0.98778	0.0010564	0.043412
WBGene00007533	cbl-1	Metabolism: 1CC: transsulfuration	1431.92	692.163	1.0488	0.00081214	0.036165
WBGene00016658	C45B2.1	Unassigned: regulated by multiple stresses	583.288	281.567	1.0507	0.00046795	0.026016
WBGene00044773	C08A9.10	Unassigned: regulated by multiple stresses	628.843	301.361	1.0612	0.0012978	0.049031
WBGene00000656	col-80	Extracellular material: collagen	12686.3	5975.87	1.0861	0.0002229	0.016065
WBGene00009453	F36A2.3	Metabolism: glycolysis	2901.21	1363	1.0899	0.00073893	0.034478
WBGene00016061	hpo-15	Metabolism: unassigned	1404.67	659.149	1.0916	0.0010984	0.044205
WBGene00000733	col-160	Extracellular material: collagen	24155.5	11227.4	1.1053	0.00041951	0.024812
WBGene00015780	C14F11.4	Unassigned: regulated by multiple stresses	349.025	160.746	1.1185	0.000691	0.032807
WBGene00189949	Y48G1C.13	Extracellular material: PGI	306.278	140.63	1.1229	0.00076621	0.035029
WBGene00022490	Y119D3B.13	Unassigned: regulated by multiple stresses	912.841	415.167	1.1367	0.0004416	0.025358
WBGene00004986	spp-1	Stress response: pathogen: saposin	2834.08	1287.67	1.1381	0.00025575	0.017264
WBGene00009243	F29C6.1	Unassigned: regulated by multiple stresses	1353.74	611.904	1.1456	0.00055331	0.028994
WBGene00020592	ugt-12	Stress response: detoxification: ugt	3089.95	1387.21	1.1554	0.00052114	0.027869
WBGene00008566	acox-3	Metabolism: lipid: beta oxidation	201.289	88.5803	1.1842	0.00060287	0.0303
WBGene00017294	F09E10.1	Unassigned: regulated by multiple stresses	710.208	310.503	1.1936	0.00022018	0.015967
WBGene00022584	ZC266.1	Transmembrane protein: seven transmembrane receptor: unassigned	177.078	77.1615	1.1984	0.0011732	0.04634
WBGene00011124	sdz-27	Development: apoptosis	765.037	332.621	1.2017	0.00020788	0.015312
WBGene00000670	col-95	Extracellular material: collagen	24164.6	10470.5	1.2066	0.00045717	0.025679
WBGene00000608	col-19	Extracellular material: collagen	12302.2	5319.7	1.2095	0.0002406	0.016823
WBGene00020386	cyp-34A4	Stress response: detoxification: CYP	200.127	85.7208	1.2232	0.00095181	0.040191
WBGene00009192	F27E5.1	Metabolism: lipid: sphingolipid	1338.13	566.16	1.2409	0.00011877	0.010303
WBGene00015613	C08F1.10	Transmembrane protein: unassigned	236.759	99.1015	1.2564	0.00058482	0.029714
WBGene00010196	F57C2.4	Unassigned	2358.17	968.027	1.2846	4.5305e-05	0.0052884
WBGene00022821	ZK813.2	Unassigned: regulated by multiple stresses	1722.99	704.608	1.29	7.0738e-05	0.0073019
WBGene00008127	ddo-1	Metabolism: amino acid: breakdown	284.776	116.355	1.2913	0.00047036	0.026045
WBGene00013073	hmit-1.1	Transmembrane transport: lipid	189.839	77.3483	1.2953	0.00062106	0.030728
WBGene00008393	D1086.6	Unassigned: regulated by multiple stresses	627.197	254.539	1.301	8.3003e-05	0.0082033
WBGene00020128	R193.2	Transmembrane protein: unassigned	5238.24	2106.35	1.3143	0.00066469	0.032058
WBGene00019232	ugt-13	Stress response: detoxification: ugt	2094.46	836.994	1.3233	4.0474e-05	0.0048196
WBGene00008358	nspc-18	Unassigned	415.786	164.099	1.3413	0.00014459	0.011925
WBGene00005552	sri-40	Transmembrane protein: seven transmembrane receptor: sri	603.987	238.185	1.3424	2.6087e-05	0.0036371
WBGene00000784	cpr-4	Proteolysis general: aspartate: cathepsin	19188.3	7515.65	1.3523	0.0005285	0.02807
WBGene00008388	D1086.1	Unassigned: regulated by multiple stresses	256.515	100.084	1.3578	0.00018305	0.013982
WBGene00009466	F36D1.7	Unassigned: regulated by multiple stresses	192.333	73.3652	1.3904	0.00018325	0.013982
WBGene00009347	F32H5.1	Proteolysis general: aspartate: cathepsin	1941.93	736.343	1.399	1.8298e-05	0.0027652
WBGene00016578	sdz-5	Proteolysis proteasome: E3: F box	96.6208	35.8393	1.4308	0.00042054	0.024812
WBGene00021664	Y48G1BL.5	Pseudogene	104.753	38.8053	1.4327	0.00041867	0.024812
WBGene00021772	math-45	Unassigned: meprin-associated Traf homology domain	103.36	38.1351	1.4385	0.00086114	0.037631
WBGene00003828	nuc-1	DNA: nuclease	2831.44	1033.67	1.4538	0.0011819	0.046372
WBGene00000752	col-179	Extracellular material: collagen	6112.92	2220.11	1.4612	6.255e-07	0.0002007
WBGene00018342	F42A10.6	Proteolysis proteasome: E3: F box	1614.13	581.018	1.4741	0.0002661	0.017754
WBGene00012213	W02D9.7	Unassigned: regulated by multiple stresses	2371.96	852.429	1.4764	4.4385e-06	0.00092825
WBGene00020954	W02G9.4	Stress response: pathogen: unassigned	1729.14	621.25	1.4768	0.0002429	0.0169
WBGene00016893	C53B7.2	Proteolysis general: inhibitor: TIL domain	544.93	195.697	1.4775	0.00081479	0.036169
WBGene00012747	Y40H7A.10	Proteolysis general: cysteine: cathepsin	1191.92	425.979	1.4844	3.0589e-06	0.00069561
WBGene00020167	T02G5.11	Pseudogene	93.4306	33.1393	1.4954	0.00061623	0.03058
WBGene00015756	C14C6.2	Unassigned	1258	445.883	1.4964	0.001141	0.045529
WBGene00021321	Y34B4A.5	Unassigned: regulated by multiple stresses	314.777	110.978	1.504	0.00080265	0.035892
WBGene00018760	irg-3	Stress response: pathogen: unassigned	365.542	127.554	1.5189	2.7095e-05	0.0037457
WBGene00013216	Y54G11A.7	Unassigned	1629.14	562.536	1.5341	2.4341e-06	0.00057591
WBGene00001500	ftn-1	Metabolism: mitochondria: unassigned	332.809	114.523	1.5391	0.0010198	0.042503
WBGene00017199	clec-45	Stress response: C-type Lectin	146.428	50.0507	1.5487	0.0001637	0.01291
WBGene00044066	fbxb-66	Proteolysis proteasome: E3: F box	111.733	37.5881	1.5717	0.00011217	0.0099332
WBGene00000657	col-81	Extracellular material: collagen	98.9239	33.2763	1.5718	0.00013923	0.011647
WBGene00018351	F42G2.2	Unassigned: regulated by multiple stresses	329.24	109.335	1.5904	2.5355e-05	0.0035777
WBGene00000716	col-143	Extracellular material: collagen	31808.3	10500.3	1.599	5.9645e-07	0.00019677
WBGene00013100	zip-7	Transcription factor: bZIP	135.237	44.5693	1.6014	3.823e-05	0.0046638
WBGene00013484	Y69H2.9	Transmembrane protein: unassigned	153.627	50.4334	1.607	4.8424e-05	0.005506
WBGene00009640	nspc-10	Unassigned: regulated by multiple stresses	836.117	266.791	1.648	9.9372e-05	0.0093442
WBGene00021503	ctsa-2	Proteolysis general: cysteine: cathepsin	2592.62	820.543	1.6598	0.00064229	0.031342
WBGene00009644	F42G4.7	Transmembrane protein: unassigned	57.4524	16.9735	1.7591	0.00073379	0.034382
WBGene00019189	H11L12.1	Unassigned: regulated by multiple stresses	279.954	81.7586	1.7757	5.4135e-07	0.00018647
WBGene00000512	ckb-2	Metabolism: lipid: phospholipid	1129.69	323.901	1.8023	3.0567e-06	0.00069561
WBGene00044174	fipr-5	Unassigned: regulated by multiple stresses	68.9825	19.4872	1.8237	0.00011714	0.010238
WBGene00016953	C55C3.3	Transmembrane protein: unassigned	46.7083	13.1649	1.827	0.0013048	0.049031
WBGene00012680	Y39B6A.21	Pseudogene	248.481	68.9202	1.8501	5.5133e-05	0.0060914
WBGene00010769	asah-1	Metabolism: lipid: sphingolipid	4628.65	1276.77	1.8581	0.00053904	0.028437
WBGene00015582	C07H6.9	Transmembrane protein: unassigned	46.8858	12.8486	1.8675	0.00087835	0.038099
WBGene00002012	hsp-12.3	Stress response: heat	82.9064	22.1921	1.9014	0.00071642	0.033798
WBGene00010752	K10G4.3	Unassigned: regulated by multiple stresses	154.696	40.8523	1.921	3.0293e-05	0.0039419
WBGene00022112	Y71F9AL.7	Unassigned: regulated by multiple stresses	196.035	51.0966	1.9398	2.4553e-07	9.9157e-05
WBGene00009637	nspc-13	Unassigned: regulated by multiple stresses	850.683	204.026	2.0599	8.5121e-05	0.008273
WBGene00044811	F12E12.11	Metabolism: lipid: sterol	465.895	111.041	2.0689	7.8066e-06	0.0014628
WBGene00045245	ttr-34	Unassigned: TransThyretin-Related family domain	297.319	70.2948	2.0805	7.9082e-06	0.00147
WBGene00009067	F23A7.1	Transmembrane protein: unassigned	94.4506	21.7665	2.1175	0.00020055	0.014913
WBGene00013492	Y70C5C.1	Unassigned	34.2747	7.78579	2.1382	0.00087309	0.037941
WBGene00018055	F35F10.5	Unassigned: regulated by multiple stresses	70.84	15.8831	2.1571	5.0032e-06	0.001019
WBGene00012212	W02D9.6	Unassigned: regulated by multiple stresses	631.844	137.316	2.2021	7.4348e-10	9.1655e-07
WBGene00011462	vap-2	Proteolysis general: unassigned	194.795	41.5353	2.2295	1.4708e-05	0.0023121
WBGene00015370	C03A7.12	NA	62.5492	12.4326	2.3309	7.2519e-06	0.001381
WBGene00022641	ZK6.6	Transmembrane transport: major facilitator	98.2349	18.5082	2.4081	1.4141e-07	6.7596e-05
WBGene00000712	col-139	Extracellular material: collagen	286.151	52.0473	2.4589	0.00066527	0.032058
WBGene00017660	F21C10.11	Unassigned: regulated by multiple stresses	114.29	20.6916	2.4656	1.5447e-08	1.0336e-05
WBGene00007454	C08F11.7	Unassigned: regulated by multiple stresses	25.6188	4.52481	2.5013	0.0011117	0.044656
WBGene00009493	hrg-4	Transmembrane transport: heme	569.221	100.15	2.5068	1.2051e-12	4.0324e-09
WBGene00011486	T05E12.3	Transmembrane transport: potassium channel	824.592	137.32	2.5861	0.00032363	0.020378
WBGene00004904	snf-5	Transmembrane transport: solute carrier	22.1984	3.44994	2.6858	0.00054381	0.028624
WBGene00000703	col-129	Extracellular material: collagen	405.961	59.0773	2.7807	6.2354e-07	0.0002007
WBGene00020992	W03F8.2	Pseudogene	76.7406	10.5415	2.8639	1.5886e-08	1.0336e-05
WBGene00044554	F41E6.15	Unassigned	165.682	22.4608	2.8829	4.5785e-09	3.972e-06
WBGene00020414	T10E9.4	Transmembrane protein: unassigned	18.284	2.4709	2.8875	0.00069192	0.032807
WBGene00010999	R03G8.4	Proteolysis general: metallopeptidase	20.3889	2.4436	3.0607	0.00023763	0.016765
WBGene00008794	F14D7.7	Unassigned: regulated by multiple stresses	154.374	17.3734	3.1515	6.7955e-12	1.7686e-08
WBGene00077673	B0563.10	Unassigned	89.2965	9.95157	3.1656	8.4884e-05	0.008273
WBGene00008797	F14D7.10	Unassigned	208.043	19.2094	3.437	1.7167e-12	5.0264e-09
WBGene00044489	pudl-1	Unassigned	51.9463	4.73304	3.4562	0.00025935	0.017456
WBGene00001766	gst-18	Stress response: detoxification: GST	19.5103	1.74612	3.482	0.0012425	0.047868
WBGene00018225	nep-14	Pseudogene	46.7883	4.0666	3.5243	3.8175e-08	2.1173e-05
WBGene00019830	hrg-1	Transmembrane transport: heme	2984.76	245.554	3.6035	7.3225e-15	3.4303e-11
WBGene00044901	Y41G9A.10	Unassigned: regulated by multiple stresses	940.168	74.8865	3.6501	0.00023583	0.016689
WBGene00015503	C06A5.5	Unassigned	43.9769	3.39642	3.6947	2.8966e-07	0.000115
WBGene00021007	W03F11.4	Signaling: phosphatase: Y	15.5149	1.12839	3.7813	0.00072642	0.034166
WBGene00007605	asp-10	Proteolysis general: aspartate: cathepsin	33901.9	1883.41	4.1699	0.00029421	0.01909
WBGene00020881	T28A11.19	Unassigned: regulated by multiple stresses	76.9221	4.25716	4.1754	4.1114e-07	0.00014815
WBGene00008097	ugt-15	Stress response: detoxification: ugt	40.6449	2.2418	4.1803	0.0012311	0.047741
WBGene00003094	lys-5	Stress response: pathogen: lysozyme	212.691	11.035	4.2686	3.1913e-05	0.0040847
WBGene00044783	T26H5.10	Unassigned	60.9465	2.87451	4.4062	0.0012531	0.047933
WBGene00001477	fmo-2	Metabolism: FMO	749.831	29.7841	4.654	0.00017475	0.013635
WBGene00021720	Y49F6B.8	Unassigned: regulated by multiple stresses	70.5049	2.56565	4.7803	2.2605e-05	0.0032887
WBGene00010473	hrg-2	Transmembrane protein: unassigned	2475.26	87.4926	4.8223	9.1426e-08	4.7588e-05
WBGene00008295	nlp-39	Neuronal function: synaptic function: neuropeptide	110.691	3.82732	4.8541	1.1154e-18	1.3063e-14
WBGene00044491	Y54G2A.48	Unassigned	17.8048	0.564196	4.9799	0.00024974	0.017005
WBGene00016670	ilys-3	Proteolysis general: lysozyme	34.2205	0.873058	5.2926	0.00020855	0.015313
WBGene00016669	ilys-2	Stress response: pathogen: unassigned	79.4151	1.62407	5.6117	2.2458e-11	5.2604e-08
WBGene00008313	C54G4.3	Unassigned: regulated by multiple stresses	34.3784	0.617725	5.7984	1.0983e-07	5.3594e-05
WBGene00010256	hrg-3	Stress response: pathogen: unassigned	340.046	5.7169	5.8944	1.9396e-06	0.00048335
WBGene00044242	C54C8.12	Unassigned	25.4624	0.308862	6.3653	1.4307e-08	1.0336e-05
WBGene00010257	F58E6.8	Transmembrane protein: unassigned	22.7662	0	Inf	1.4184e-08	1.0336e-05
WBGene00019783	M70.1	Transmembrane protein: unassigned	8.20305	0	Inf	0.00097553	0.040876
WBGene00021619	Y47D7A.6	Unassigned: regulated by multiple stresses	40.6555	0	Inf	3.6284e-07	0.0001349
WBGene00044804	ZK938.8	Pseudogene	26.0756	0	Inf	1.3e-09	1.45e-06

## Sheet: E. dbl-1(-) Ef vs dbl-1(-) OP50
Gene_id	Gene name	Functional Category	readcount dbl-1(-)_Ef	readcount dbl-1(-)_OP50	log2FoldChange [dbl-1(-)_Ef/ dbl-1(-)_OP50]	pval	padj
WBGene00008519	cyp-13B1	Stress response: detoxification: CYP	41.7066	493.197	-3.5638	1.0521e-05	0.0031144
WBGene00001397	fat-5	Metabolism: lipid: fatty acid	27.7775	327.462	-3.5593	1.8785e-19	4.3373e-15
WBGene00002260	lbp-8	Metabolism: lipid: binding	59.1019	455.763	-2.947	5.8085e-09	1.8835e-05
WBGene00017490	pud-2.1	Unassigned	5.11785	34.5771	-2.7562	8.1453e-05	0.013371
WBGene00013646	Y105C5B.3	Lysosome: acid phosphatase	3.71489	24.8633	-2.7426	0.00040618	0.040424
WBGene00020472	lips-11	Metabolism: lipid: lipase	7.92174	49.3412	-2.6389	6.5727e-06	0.0023712
WBGene00013101	Y51H4A.5	Unassigned: regulated by multiple stresses	12.429	72.3132	-2.5405	7.1049e-06	0.002499
WBGene00017499	pud-1.1	Unassigned	5.95962	30.7005	-2.365	0.0004555	0.043821
WBGene00001399	fat-7	Metabolism: lipid: fatty acid	14.1821	70.5015	-2.3136	0.00039959	0.040113
WBGene00021002	W03F9.4	Metabolism: lipid: beta oxidation	35.7456	175.754	-2.2977	7.7694e-09	1.9932e-05
WBGene00017312	pitr-5	Transmembrane transport: solute carrier	30.1415	132.683	-2.1382	2.3321e-07	0.0002564
WBGene00022261	clec-210	Stress response: C-type Lectin	39.0311	151.243	-1.9542	0.000394	0.039865
WBGene00000720	col-147	Extracellular material: collagen	974.327	3159.67	-1.6973	3.659e-05	0.0073806
WBGene00003096	lys-7	Stress response: pathogen: lysozyme	2540.32	7732.61	-1.6059	5.5585e-07	0.00040892
WBGene00010411	H25K10.1	Lysosome: acid phosphatase	74.0045	221.379	-1.5808	0.00010298	0.015851
WBGene00018645	F49F1.5	Development: apoptosis	80.9897	238.12	-1.5559	0.0003468	0.037071
WBGene00017335	F10D2.10	Unassigned: regulated by multiple stresses	35.3679	99.9535	-1.4988	0.0003333	0.035961
WBGene00017060	D2063.1	Metabolism: short chain dehydrogenase	41.6407	115.727	-1.4747	0.00041648	0.041094
WBGene00011800	T16G1.6	Unassigned	136.269	328.596	-1.2699	0.00040433	0.040413
WBGene00012538	Y37A1B.5	Unassigned	1506.54	721.879	1.0614	0.00039538	0.039865
WBGene00000733	col-160	Extracellular material: collagen	19659	8651.48	1.1842	0.00015394	0.021031
WBGene00015780	C14F11.4	Unassigned: regulated by multiple stresses	699.835	280.215	1.3205	0.00012684	0.018252
WBGene00021874	Y54G2A.9	Merged into clec-80	278.46	109.311	1.349	7.6307e-05	0.012955
WBGene00010740	K10D3.6	Transmembrane protein: unassigned	206.162	78.863	1.3864	0.00032805	0.035897
WBGene00001483	fog-3	Signaling: unassigned	75.1526	26.5878	1.4991	0.00048747	0.046128
WBGene00007203	best-1	Transmembrane transport: chloride channel	236.413	82.2061	1.524	0.00027955	0.032034
WBGene00008358	nspc-18	Unassigned	201.001	68.4391	1.5543	0.00031173	0.034274
WBGene00235306	W03D2.13	NA	96.7259	30.5479	1.6628	0.00028955	0.032933
WBGene00020981	W03D2.6	Pseudogene	193.119	55.7771	1.7917	5.2112e-06	0.0020393
WBGene00016450	clec-5	Stress response: C-type Lectin	172.973	48.2204	1.8428	2.429e-06	0.0012192
WBGene00044554	F41E6.15	Unassigned	151.547	41.2008	1.879	3.1756e-06	0.00141
WBGene00044212	Y68A4A.13	Unassigned: regulated by multiple stresses	86.627	21.7431	1.9943	3.0551e-05	0.0066544
WBGene00008794	F14D7.7	Unassigned: regulated by multiple stresses	79.8521	19.6989	2.0192	1.4851e-05	0.0040634
WBGene00044489	pudl-1	Unassigned	49.3352	12.0359	2.0353	0.00031155	0.034274
WBGene00011462	vap-2	Proteolysis general: unassigned	218.298	52.1622	2.0652	4.36e-08	8.389e-05
WBGene00000784	cpr-4	Proteolysis general: aspartate: cathepsin	11759.4	2728.58	2.1076	0.00038533	0.039542
WBGene00011460	ttr-14	Unassigned: regulated by multiple stresses	285.661	64.564	2.1455	2.9735e-08	6.2413e-05
WBGene00020661	smz-2	Development: germline	59.7887	13.0229	2.1988	1.5134e-05	0.0040634
WBGene00018315	F41H10.2	Unassigned: regulated by multiple stresses	47.4951	9.91079	2.2607	0.00035196	0.037449
WBGene00013900	ugt-18	Stress response: detoxification: ugt	178.066	36.6707	2.2797	6.1295e-07	0.00042886
WBGene00009778	F46C5.1	Unassigned: membrane spanning domain	161.038	33.104	2.2823	1.1996e-08	2.7698e-05
WBGene00008357	nspc-16	Unassigned	262.013	53.8032	2.2839	1.1822e-05	0.0034121
WBGene00017592	F19C7.2	Proteolysis general: serine	147.874	28.5408	2.3733	0.00024741	0.029349
WBGene00008797	F14D7.10	Unassigned	92.4014	17.611	2.3914	1.8754e-07	0.0002253
WBGene00009884	F49C12.15	Unassigned	163.044	30.3218	2.4268	2.6093e-05	0.0059066
WBGene00010241	F58D2.2	Transmembrane protein: unassigned	40.1604	6.83999	2.5537	8.1654e-05	0.013371
WBGene00005188	srg-31	Transmembrane protein: seven transmembrane receptor: srg	37.0803	6.02762	2.621	4.2153e-05	0.0083186
WBGene00000647	col-71	Extracellular material: collagen	191.181	29.625	2.6901	0.00041136	0.040764
WBGene00015348	C02F5.5	Unassigned: regulated by multiple stresses	32.7535	4.55559	2.8459	5.9915e-05	0.010641
WBGene00019785	M70.3	Transmembrane protein: unassigned	30.3458	3.92034	2.9524	0.00024031	0.028898
WBGene00000712	col-139	Extracellular material: collagen	808.43	97.3744	3.0535	0.00017684	0.023068
WBGene00012926	Y47D3A.13	Unassigned: regulated by multiple stresses	35.1172	4.18656	3.0683	0.00038481	0.039542
WBGene00008448	E01G4.6	Unassigned: regulated by multiple stresses	96.9231	11.3956	3.0884	2.3202e-05	0.0054664
WBGene00006039	ssp-10	Unassigned	50.8155	5.88663	3.1098	0.00010132	0.015701
WBGene00014005	ZK593.9	Pseudogene	21.4008	2.40452	3.1538	0.00044884	0.043543
WBGene00000657	col-81	Extracellular material: collagen	444.395	47.6397	3.2216	0.00027362	0.031588
WBGene00015929	C17H12.3	Signaling: phosphatase: Y	26.0492	2.73539	3.2514	4.864e-05	0.0092314
WBGene00022705	ZK354.2	Cytoskeleton: microtubule: tau tubulin kinase	37.2184	3.74983	3.3111	0.00015715	0.021343
WBGene00003429	msp-31	Major sperm protein	149.033	14.9072	3.3216	9.933e-05	0.015496
WBGene00010651	K08C9.2	Unassigned	38.8233	3.788	3.3574	0.00020501	0.025587
WBGene00013771	Y113G7C.1	Signaling: phosphatase: Y	71.1125	6.88377	3.3688	0.00032973	0.035911
WBGene00012547	Y37D8A.5	Transmembrane protein: unassigned	24.0155	2.18719	3.4568	0.00025932	0.030239
WBGene00004904	snf-5	Transmembrane transport: solute carrier	58.3074	5.16283	3.4974	5.7897e-05	0.010526
WBGene00010246	F58D5.7	Unassigned: regulated by multiple stresses	20.8605	1.69142	3.6245	0.00035963	0.037837
WBGene00000694	col-120	Extracellular material: collagen	41.6326	3.27137	3.6697	8.3358e-05	0.013439
WBGene00022778	ZK616.8	Signaling: phosphatase: Y	19.9304	1.54178	3.6923	0.00014395	0.019902
WBGene00011951	T23F6.3	Unassigned: regulated by multiple stresses	27.4764	2.06706	3.7325	0.00011765	0.017413
WBGene00010091	ssp-35	Unassigned: regulated by multiple stresses	29.7635	2.18719	3.7664	1.0759e-05	0.0031445
WBGene00009682	msd-2	Unassigned	55.9975	4.11021	3.7681	9.276e-06	0.0028557
WBGene00020353	T08B6.4	Transmembrane protein: unassigned	69.2427	5.0427	3.7794	3.6761e-05	0.0073806
WBGene00022090	Y69A2AR.19	Signaling: phosphatase: Y	65.0796	4.61463	3.8179	0.00024894	0.029349
WBGene00018134	F37A4.4	Unassigned: regulated by multiple stresses	23.2944	1.63033	3.8367	2.0051e-05	0.0050739
WBGene00003431	msp-33	Major sperm protein	141.177	9.87671	3.8373	5.0346e-05	0.0093745
WBGene00016440	gipc-1	Signaling: unassigned	160.615	10.9329	3.8769	8.6177e-05	0.013722
WBGene00021381	Y37E11B.10	Unassigned: regulated by multiple stresses	50.4922	3.40371	3.8909	0.00045433	0.043821
WBGene00017058	D2062.6	Unassigned: regulated by multiple stresses	23.29	1.56264	3.8977	0.00053037	0.049378
WBGene00012809	Y43F8A.2	Unassigned: regulated by multiple stresses	36.3988	2.39792	3.924	3.1776e-05	0.0067714
WBGene00021791	Y51H7C.13	Unassigned: regulated by multiple stresses	111.034	7.28892	3.9292	0.00016178	0.021717
WBGene00009470	F36D3.4	Unassigned	26.3281	1.70008	3.9529	0.00035487	0.037586
WBGene00007977	gska-3	Signaling: MAPK	34.6454	2.21671	3.9662	0.00019233	0.024566
WBGene00013474	Y69E1A.2	Unassigned	85.8346	5.47943	3.9695	3.0838e-05	0.0066544
WBGene00011214	R10E9.2	Unassigned: regulated by multiple stresses	60.0172	3.77935	3.9892	4.5055e-05	0.0087418
WBGene00009471	F36D3.5	Transmembrane protein: unassigned	13.6912	0.856144	3.9992	0.00047547	0.045178
WBGene00010612	K07A1.5	Transmembrane protein: unassigned	20.5806	1.26335	4.026	0.00030827	0.034274
WBGene00006050	ssq-1	Unassigned	209.044	12.5749	4.0552	8.0933e-05	0.013371
WBGene00001477	fmo-2	Metabolism: FMO	337.214	20.237	4.0586	3.6221e-11	2.7877e-07
WBGene00020187	gsp-4	Signaling: phosphatase: unassigned	66.833	4.00739	4.0598	5.331e-05	0.009847
WBGene00003467	msp-81	Major sperm protein	119.33	7.06143	4.0789	3.2905e-06	0.0014335
WBGene00015908	C17F3.3	Unassigned: regulated by multiple stresses	15.7013	0.923836	4.0871	0.00036052	0.037837
WBGene00013290	Y57G11A.2	Extracellular material: PGI	94.4593	5.45346	4.1144	0.00016652	0.022224
WBGene00000748	col-175	Extracellular material: collagen	83.8967	4.78158	4.1331	3.0801e-06	0.0013944
WBGene00015024	B0205.10	Unassigned: regulated by multiple stresses	66.1811	3.74117	4.1449	0.0001185	0.017427
WBGene00014179	ZK1010.5	Unassigned: regulated by multiple stresses	50.5094	2.82599	4.1597	2.0437e-05	0.0050739
WBGene00009459	F36A2.12	Unassigned: regulated by multiple stresses	16.5179	0.923836	4.1602	0.00023173	0.028161
WBGene00004394	rol-1	Extracellular material: collagen	127.169	6.84659	4.2152	0.00023446	0.028343
WBGene00016017	C23G10.11	Unassigned	94.4929	5.01318	4.2364	5.3394e-06	0.0020547
WBGene00011954	T23F11.2	Unassigned: regulated by multiple stresses	17.0297	0.894317	4.2511	0.00014191	0.019738
WBGene00003442	msp-49	Major sperm protein	59.7084	3.13394	4.2519	0.00016799	0.022291
WBGene00022888	rnh-1.1	mRNA functions: processing: nuclease	16.3549	0.856144	4.2557	0.0001456	0.02001
WBGene00019430	K06A5.2	Transmembrane protein: unassigned	91.2532	4.73475	4.2685	4.5664e-05	0.0087861
WBGene00018548	clec-79	Stress response: C-type Lectin	32.7071	1.69142	4.2733	4.6853e-06	0.0018651
WBGene00011132	R08A2.1	Unassigned: regulated by multiple stresses	17.9662	0.923836	4.2815	7.7852e-05	0.013121
WBGene00011176	R09E10.6	Development: germline	135.613	6.84559	4.3082	1.9052e-06	0.0010393
WBGene00003466	msp-79	Major sperm protein	46.3271	2.28645	4.3407	8.6723e-07	0.0005721
WBGene00009605	F40G12.10	Signaling: phosphatase: Y	26.2341	1.28422	4.3525	2.4054e-05	0.0056099
WBGene00006057	sss-2	Pseudogene	56.6138	2.7649	4.3559	0.00025099	0.029416
WBGene00009344	F32H2.7	Unassigned: regulated by multiple stresses	46.5606	2.26914	4.3589	8.2784e-06	0.0026727
WBGene00003450	msp-57	Major sperm protein	188.194	8.83936	4.4121	3.0763e-05	0.0066544
WBGene00006053	ssq-4	Unassigned: regulated by multiple stresses	262.555	12.3077	4.415	1.7495e-05	0.0045901
WBGene00015855	C16C8.18	Cytoskeleton: microtubule: RMDN	18.5056	0.864798	4.4195	6.1417e-05	0.010825
WBGene00009143	F26A3.5	Unassigned	18.6198	0.864798	4.4283	5.9792e-05	0.010641
WBGene00014665	C04G2.3	Pseudogene	30.9789	1.413	4.4545	0.0004939	0.046546
WBGene00011491	T05F1.5	Unassigned: regulated by multiple stresses	25.1635	1.14322	4.4601	0.00011634	0.01733
WBGene00008063	C41G7.6	NA	47.5425	2.09863	4.5017	6.5092e-05	0.0113
WBGene00012357	W09D6.4	Unassigned: regulated by multiple stresses	19.7153	0.856144	4.5253	0.00042583	0.041661
WBGene00011748	T13F2.9	Pseudogene	105.678	4.5729	4.5304	0.00016151	0.021717
WBGene00012595	Y38E10A.17	Unassigned: regulated by multiple stresses	113.406	4.90171	4.5321	0.00039044	0.039865
WBGene00009031	F21H7.5	Unassigned: regulated by multiple stresses	77.3261	3.21028	4.5902	4.388e-06	0.0017775
WBGene00013854	cyc-2.2	Metabolism: mitochondria: complex III	38.8485	1.60082	4.601	2.0301e-05	0.0050739
WBGene00016161	C27D6.3	Transmembrane protein: unassigned	24.6947	1.01444	4.6054	0.00044596	0.043446
WBGene00015634	C09D4.3	Cytoskeleton: microtubule: tau tubulin kinase	27.9411	1.14322	4.6112	0.00030407	0.034081
WBGene00021113	gsp-3	Signaling: phosphatase: unassigned	80.4281	3.28358	4.6144	0.00020095	0.025216
WBGene00011911	T22B3.3	Unassigned: regulated by multiple stresses	20.7005	0.835279	4.6313	0.00024839	0.029349
WBGene00043147	nspd-6	Unassigned: regulated by multiple stresses	35.2506	1.42165	4.632	0.00019462	0.02469
WBGene00019949	R08C7.5	Unassigned: regulated by multiple stresses	14.7621	0.586372	4.6539	0.00029525	0.033417
WBGene00017542	F17E9.5	Transmembrane protein: unassigned	92.4642	3.66788	4.6559	8.3346e-06	0.0026727
WBGene00007763	C27B7.6	Signaling: phosphatase: unassigned	21.0954	0.835279	4.6585	1.4217e-05	0.0039901
WBGene00003435	msp-40	Major sperm protein	155.819	6.09737	4.6755	7.6075e-06	0.0025479
WBGene00016447	msd-4	Unassigned	87.1465	3.38945	4.6843	1.1515e-07	0.00017037
WBGene00006449	alg-4	Non-coding RNA: small RNA: argonaute	62.4918	2.42744	4.6862	0.00013403	0.018986
WBGene00003446	msp-53	Major sperm protein	93.261	3.57066	4.707	3.5382e-06	0.0015128
WBGene00013987	ZK512.8	Unassigned: regulated by multiple stresses	15.1391	0.556853	4.7648	0.00018311	0.023752
WBGene00017386	nspd-5	Unassigned: regulated by multiple stresses	57.7281	2.11949	4.7675	8.9232e-08	0.00014716
WBGene00007301	C04F12.7	Transmembrane protein: unassigned	82.6594	2.99295	4.7875	1.4092e-05	0.0039901
WBGene00018083	F36A4.4	Unassigned: regulated by multiple stresses	15.4416	0.556853	4.7934	0.00016936	0.022345
WBGene00008724	F13A7.1	Unassigned: regulated by multiple stresses	56.0597	2.00802	4.8031	0.00038371	0.039542
WBGene00003434	msp-38	Major sperm protein	59.6486	2.12815	4.8088	4.1698e-12	4.8139e-08
WBGene00016388	C34B2.3	Cytoskeleton: microtubule: tau tubulin kinase	12.1037	0.428072	4.8215	0.00041852	0.04112
WBGene00020841	T27A3.5	Signaling: phosphatase: Y	24.7874	0.864798	4.8411	1.5794e-06	0.00091164
WBGene00009681	gipc-2	Signaling: unassigned	179.249	6.22615	4.8475	7.7501e-06	0.0025563
WBGene00013473	Y69E1A.1	Transmembrane protein: unassigned	57.8467	1.99071	4.8609	3.6701e-05	0.0073806
WBGene00000626	col-49	Extracellular material: collagen	69.5929	2.37501	4.8729	8.3817e-05	0.013439
WBGene00022751	ZK484.5	Unassigned: regulated by multiple stresses	135.4	4.57645	4.8869	2.1549e-05	0.0052929
WBGene00013158	Y53F4B.11	Unassigned: regulated by multiple stresses	16.5868	0.556853	4.8966	7.4925e-05	0.012814
WBGene00007320	C05B5.2	Unassigned: membrane spanning domain	42.9163	1.42165	4.9159	0.0005273	0.049291
WBGene00022754	nspd-1	Unassigned: regulated by multiple stresses	112.604	3.72031	4.9197	2.504e-05	0.0057815
WBGene00010366	H05L14.1	Cytoskeleton: microtubule: tau tubulin kinase	17.8251	0.586372	4.9259	0.00039244	0.039865
WBGene00006052	ssq-3	Unassigned: regulated by multiple stresses	61.0418	1.99937	4.9322	3.249e-05	0.0068196
WBGene00003444	msp-51	Major sperm protein	96.701	3.11307	4.9571	2.2114e-05	0.0053123
WBGene00003424	msp-3	Major sperm protein	64.1773	2.03754	4.9772	8.6081e-06	0.0027226
WBGene00019406	acdh-8	Metabolism: lipid: beta oxidation	36.0218	1.14322	4.9777	2.2187e-05	0.0053123
WBGene00006051	ssq-2	Unassigned: regulated by multiple stresses	237.417	7.51902	4.9807	5.6674e-07	0.00040892
WBGene00010254	F58E6.5	Unassigned: regulated by multiple stresses	22.9396	0.706498	5.021	1.6503e-06	0.00092937
WBGene00003469	msp-142	Major sperm protein	61.6033	1.87924	5.0348	0.00033314	0.035961
WBGene00000711	col-138	Extracellular material: collagen	138.25	4.12547	5.0666	6.3756e-06	0.0023366
WBGene00020414	T10E9.4	Transmembrane protein: unassigned	101.976	3.01381	5.0805	0.00013736	0.019339
WBGene00003470	msp-152	Major sperm protein	111.645	3.25406	5.1005	7.3755e-06	0.0025417
WBGene00013999	ZK550.5	Metabolism: lipid: beta oxidation	40.6937	1.17274	5.1168	1.9516e-07	0.0002253
WBGene00017112	E03H12.5	Unassigned: regulated by multiple stresses	62.604	1.78863	5.1293	2.2318e-05	0.0053123
WBGene00007688	C18E9.8	Unassigned	19.6955	0.556853	5.1444	0.00010924	0.016378
WBGene00003458	msp-65	Major sperm protein	41.3755	1.14322	5.1776	3.652e-06	0.0015331
WBGene00003432	msp-36	Major sperm protein	153.847	4.24764	5.1787	2.6812e-06	0.001294
WBGene00003449	msp-56	Major sperm protein	52.5447	1.44252	5.1869	2.8733e-05	0.0063791
WBGene00008590	F08H9.2	Unassigned: regulated by multiple stresses	50.2059	1.29287	5.2792	6.7645e-05	0.011656
WBGene00012087	T27E7.1	Unassigned: regulated by multiple stresses	57.5161	1.47203	5.2881	1.4379e-06	0.00085129
WBGene00017851	F27C1.1	Unassigned: regulated by multiple stresses	72.0238	1.8202	5.3063	8.2605e-07	0.00056096
WBGene00010633	nspd-2	Unassigned: regulated by multiple stresses	114.615	2.89369	5.3077	2.7429e-06	0.001294
WBGene00003452	msp-59	Major sperm protein	111.459	2.81378	5.3079	5.7752e-09	1.8835e-05
WBGene00006044	ssp-16	Unassigned	28.2694	0.706498	5.3224	0.00012421	0.018151
WBGene00003426	msp-19	Major sperm protein	88.0961	2.18719	5.3319	3.7247e-07	0.00033077
WBGene00014158	ZK938.1	Signaling: phosphatase: unassigned	68.3338	1.67056	5.3542	4.0003e-05	0.0079623
WBGene00020860	nspd-10	Unassigned: regulated by multiple stresses	29.1771	0.706498	5.368	0.00036794	0.038267
WBGene00007082	acs-10	Metabolism: lipid: fatty acid	38.2467	0.923836	5.3716	1.4058e-07	0.00019093
WBGene00011466	T05C12.1	Cytoskeleton: microtubule: tau tubulin kinase	23.3415	0.556853	5.3895	0.00046002	0.044072
WBGene00003448	msp-55	Major sperm protein	81.1253	1.87924	5.4319	2.5613e-07	0.00025712
WBGene00000256	bli-6	Extracellular material: collagen	127.547	2.86212	5.4778	4.7242e-07	0.00037402
WBGene00010611	K07A1.4	Unassigned: regulated by multiple stresses	12.4777	0.278426	5.4859	0.00034156	0.03668
WBGene00043743	Y59E9AL.2	Unassigned	26.6316	0.586372	5.5052	1.7614e-07	0.0002253
WBGene00017325	F10C1.3	Unassigned: regulated by multiple stresses	12.6864	0.278426	5.5098	0.00028025	0.032034
WBGene00007081	AH6.3	Transmembrane protein: unassigned	12.803	0.278426	5.523	0.00031061	0.034274
WBGene00020840	spch-3	Development: germline	131.648	2.8433	5.533	1.5981e-05	0.0042413
WBGene00009321	F32B6.4	Unassigned: regulated by multiple stresses	25.814	0.556853	5.5347	8.2409e-05	0.0134
WBGene00020990	W03D8.9	Transmembrane protein: unassigned	79.6155	1.67056	5.5746	2.0931e-06	0.001074
WBGene00016707	C46E10.1	Unassigned: regulated by multiple stresses	13.4794	0.278426	5.5973	0.00036532	0.038166
WBGene00007601	C15C6.2	Unassigned: regulated by multiple stresses	91.9642	1.87924	5.6129	3.3735e-05	0.0070171
WBGene00003464	msp-77	Major sperm protein	124.112	2.43609	5.6709	1.2044e-06	0.00077248
WBGene00018531	F47B3.7	Signaling: phosphatase: Y	14.6243	0.278426	5.7149	0.00046723	0.044578
WBGene00003465	msp-78	Major sperm protein	73.2261	1.39213	5.717	7.6141e-06	0.0025479
WBGene00011919	T22C1.9	Transmembrane protein: unassigned	15.3959	0.278426	5.7891	4.9178e-05	0.0092314
WBGene00044388	C27D6.11	Signaling: S/T kinase	15.4641	0.278426	5.7955	5.5238e-05	0.010122
WBGene00011114	R07E5.6	Unassigned: regulated by multiple stresses	16.0038	0.278426	5.845	3.6088e-05	0.0073806
WBGene00003468	msp-113	Major sperm protein	69.1695	1.20226	5.8463	0.00012647	0.018252
WBGene00001603	gln-2	Metabolism: amino acid: synthesis	52.2383	0.894317	5.8682	0.00017151	0.0225
WBGene00012827	Y43F8C.5	Unassigned: regulated by multiple stresses	16.7064	0.278426	5.907	1.9743e-05	0.0050649
WBGene00007733	smz-1	Development: germline	68.946	1.14322	5.9143	4.4197e-07	0.00036445
WBGene00020713	T23B3.5	Unassigned: regulated by multiple stresses	85.5637	1.413	5.9202	1.4089e-06	0.00085129
WBGene00021007	W03F11.4	Signaling: phosphatase: Y	51.1888	0.835279	5.9374	2.9793e-06	0.0013758
WBGene00021288	clec-123	Stress response: C-type Lectin	34.177	0.556853	5.9396	2.7974e-05	0.0062709
WBGene00014046	clec-60	Stress response: C-type Lectin	60.7894	0.984925	5.9477	1.558e-10	7.1946e-07
WBGene00016351	C33F10.1	Unassigned: regulated by multiple stresses	88.8041	1.42165	5.965	4.2111e-07	0.00036011
WBGene00016752	C48E7.7	Neuronal function: development	19.8554	0.307945	6.0107	4.4691e-05	0.0087418
WBGene00014247	ZK1307.4	Unassigned: regulated by multiple stresses	18.5509	0.278426	6.0581	6.0255e-06	0.0022807
WBGene00003457	msp-64	Major sperm protein	61.5149	0.894317	6.104	9.4585e-05	0.014856
WBGene00014169	ZK945.7	Unassigned: regulated by multiple stresses	40.8328	0.586372	6.1218	6.3192e-06	0.0023366
WBGene00008313	C54G4.3	Unassigned: regulated by multiple stresses	19.9498	0.278426	6.1629	2.7463e-06	0.001294
WBGene00015051	B0218.7	Unassigned: regulated by multiple stresses	20.5103	0.278426	6.2029	1.4004e-06	0.00085129
WBGene00003438	msp-45	Major sperm protein	103.844	1.39213	6.221	1.4925e-10	7.1946e-07
WBGene00010265	F58G1.3	Signaling: phosphatase: unassigned	22.9846	0.307945	6.2218	0.00019258	0.024566
WBGene00007584	C14C10.1	Transmembrane transport: mitochondrial: solute carrier	42.2207	0.556853	6.2445	1.4343e-05	0.0039901
WBGene00020350	T08B2.12	Unassigned	27.6098	0.307945	6.4864	0.00021978	0.026992
WBGene00011120	R07E5.15	Unassigned: regulated by multiple stresses	27.6387	0.307945	6.4879	9.4243e-06	0.0028631
WBGene00044447	ZK688.10	Transmembrane protein: unassigned	28.4348	0.307945	6.5288	6.526e-09	1.8835e-05
WBGene00194703	F26B1.8	Unassigned: regulated by multiple stresses	78.8648	0.835279	6.561	2.4864e-07	0.00025712
WBGene00019026	F58A6.9	Unassigned: regulated by multiple stresses	28.2893	0.278426	6.6668	9.0181e-05	0.014262
WBGene00016680	C45G9.9	Unassigned: regulated by multiple stresses	28.4328	0.278426	6.6741	4.8598e-07	0.00037402
WBGene00011173	acs-18	Metabolism: lipid: fatty acid	31.9558	0.278426	6.8426	1.5135e-05	0.0040634
WBGene00021398	Y38C1AA.7	Transmembrane protein: unassigned	125.175	0.984925	6.9897	1.969e-06	0.0010393
WBGene00007987	C36H8.1	Transmembrane protein: unassigned	37.615	0.278426	7.0779	1.9805e-06	0.0010393
WBGene00004965	spe-11	Development: general	38.0548	0.278426	7.0946	3.6488e-07	0.00033077
WBGene00015688	C10G11.8	Proteolysis proteasome: 19S	97.0232	0.706498	7.1015	3.0736e-07	0.0002957
WBGene00006056	sss-1	Unassigned: regulated by multiple stresses	94.5426	0.586372	7.333	6.1318e-08	0.0001089
WBGene00013956	ZK265.3	Unassigned: regulated by multiple stresses	46.7931	0.278426	7.3929	0.0001075	0.016223
WBGene00006040	ssp-11	Unassigned	19.8554	0	Inf	9.0331e-06	0.0028185
WBGene00007156	B0379.2	Unassigned: membrane spanning domain	12.592	0	Inf	6.2948e-05	0.011011
WBGene00007457	C08F11.10	Unassigned: regulated by multiple stresses	16.1204	0	Inf	0.0002184	0.026966
WBGene00008508	F01G10.5	Unassigned: regulated by multiple stresses	17.6624	0	Inf	1.8077e-05	0.0046898
WBGene00009581	F40F9.3	Unassigned: regulated by multiple stresses	15.7695	0	Inf	7.1434e-06	0.002499
WBGene00009680	msd-1	Unassigned	13.9936	0	Inf	2.5745e-05	0.0058855
WBGene00010486	K01H12.4	Unassigned: regulated by multiple stresses	14.6929	0	Inf	0.00020924	0.025974
WBGene00010728	K09G1.2	Transmembrane protein: unassigned	11.3066	0	Inf	0.00020016	0.025216
WBGene00010900	M28.9	Transmembrane protein: unassigned	27.339	0	Inf	0.00010383	0.015877
WBGene00010933	M162.7	Unassigned: regulated by multiple stresses	11.0983	0	Inf	0.00026635	0.030904
WBGene00011378	T02E1.6	Transmembrane protein: unassigned	16.2383	0	Inf	4.0602e-06	0.001674
WBGene00011379	T02E1.7	Transmembrane protein: unassigned	16.7716	0	Inf	8.14e-05	0.013371
WBGene00014129	ZK892.5	Transmembrane protein: unassigned	12.3356	0	Inf	5.9904e-05	0.010641
WBGene00014240	htas-1	Transcription: chromatin structure: histone	12.1003	0	Inf	0.00024914	0.029349
WBGene00015627	C09B9.2	Transmembrane protein: unassigned	21.9822	0	Inf	3.1967e-05	0.0067714
WBGene00015987	C18G1.9	Unassigned	9.50884	0	Inf	0.00050263	0.047176
WBGene00015992	C18H2.5	Transmembrane protein: unassigned	11.6353	0	Inf	0.00013381	0.018986
WBGene00016054	C24D10.2	Transmembrane protein: unassigned	24.0176	0	Inf	0.00029737	0.033492
WBGene00016954	C55C3.4	Signaling: Y kinase	12.0546	0	Inf	0.00018962	0.024458
WBGene00017059	D2062.7	Transmembrane protein: unassigned	19.4609	0	Inf	0.00012727	0.018252
WBGene00017387	mpst-4	Metabolism: unassigned	13.4337	0	Inf	0.0001401	0.019605
WBGene00017978	F32B5.4	Unassigned: regulated by multiple stresses	21.4939	0	Inf	4.91e-05	0.0092314
WBGene00019410	K05F1.9	Unassigned	31.9104	0	Inf	1.1806e-07	0.00017037
WBGene00019561	K09C6.7	Cytoskeleton: microtubule: tau tubulin kinase	15.2329	0	Inf	9.7724e-06	0.0029303
WBGene00020991	W03D8.10	Pseudogene	14.4388	0	Inf	0.00010744	0.016223
WBGene00021006	dct-9	Unassigned: regulated by multiple stresses	10.4884	0	Inf	0.00023136	0.028161

## Sheet: F. WT Ef vs dbl-1(-) Ef
F. Overlapping genes between panels D and E
Gene_id	Gene name	Functional Category	log2FoldChange (WT_Ef/WT_OP50)	log2FoldChange [dbl-1(-)_Ef/ dbl-1(-)_OP50]
WBGene00002260	lbp-8	Metabolism: lipid: binding	-3.459	-2.947
WBGene00022261	clec-210	Stress response: C-type Lectin	-3.3921	-1.9542
WBGene00020472	lips-11	Metabolism: lipid: lipase	-3.3495	-2.6389
WBGene00018645	F49F1.5	Development: apoptosis	-2.9144	-1.5559
WBGene00010411	H25K10.1	Lysosome: acid phosphatase	-2.7557	-1.5808
WBGene00017312	pitr-5	Transmembrane transport: solute carrier	-2.273	-2.1382
WBGene00011800	T16G1.6	Unassigned	-2.2654	-1.2699
WBGene00008519	cyp-13B1	Stress response: detoxification: CYP	-2.2176	-3.5638
WBGene00001397	fat-5	Metabolism: lipid: fatty acid	-2.0897	-3.5593
WBGene00017335	F10D2.10	Unassigned: regulated by multiple stresses	-1.7673	-1.4988
WBGene00021002	W03F9.4	Metabolism: lipid: beta oxidation	-1.7149	-2.2977
WBGene00001399	fat-7	Metabolism: lipid: fatty acid	-1.6554	-2.3136
WBGene00017060	D2063.1	Metabolism: short chain dehydrogenase	-1.5529	-1.4747
WBGene00000720	col-147	Extracellular material: collagen	-1.4878	-1.6973
WBGene00000733	col-160	Extracellular material: collagen	1.1053	1.1842
WBGene00015780	C14F11.4	Unassigned: regulated by multiple stresses	1.1185	1.3205
WBGene00008358	nspc-18	Unassigned	1.3413	1.5543
WBGene00000784	cpr-4	Proteolysis general: aspartate: cathepsin	1.3523	2.1076
WBGene00000657	col-81	Extracellular material: collagen	1.5718	3.2216
WBGene00011462	vap-2	Proteolysis general: unassigned	2.2295	2.0652
WBGene00000712	col-139	Extracellular material: collagen	2.4589	3.0535
WBGene00004904	snf-5	Transmembrane transport: solute carrier	2.6858	3.4974
WBGene00044554	F41E6.15	Unassigned	2.8829	1.879
WBGene00020414	T10E9.4	Transmembrane protein: unassigned	2.8875	5.0805
WBGene00008794	F14D7.7	Unassigned: regulated by multiple stresses	3.1515	2.0192
WBGene00008797	F14D7.10	Unassigned	3.437	2.3914
WBGene00021007	W03F11.4	Signaling: phosphatase: Y	3.7813	5.9374
WBGene00001477	fmo-2	Metabolism: FMO	4.654	4.0586
WBGene00044489	pudl-1	Unassigned	4.73304	2.0353
WBGene00008313	C54G4.3	Unassigned: regulated by multiple stresses	5.7984	6.1629

## Sheet: G. WT Sm vs WT Ef
G. Overlapping genes between panels A and D
Gene_id	Gene name	Functional Category	log2FoldChange (WT_Sm/WT_OP50)	log2FoldChange (WT_Ef/WT_OP50)
WBGene00022261	clec-210	Stress response: C-type Lectin	-7.0126	-3.3921
WBGene00009526	clec-169	Stress response: C-type Lectin	-5.6007	-4.7669
WBGene00009255	ugt-34	Stress response: detoxification: ugt	-5.1177	-2.2063
WBGene00002260	lbp-8	Metabolism: lipid: binding	-4.514	-3.459
WBGene00003995	pgp-1	Transmembrane transport: ABC	-3.4752	-2.7396
WBGene00015225	B0507.8	Cytoskeleton: unassigned	-3.2388	-2.0611
WBGene00016340	gba-2	Metabolism: lipid: sphingolipid	-2.9016	-1.559
WBGene00011800	T16G1.6	Unassigned	-2.4416	-2.2654
WBGene00020587	ugt-9	Stress response: detoxification: ugt	-2.2643	-1.6467
WBGene00019886	R05D8.9	Metabolism: lipid: sterol	-2.21	-2.1265
WBGene00018393	msra-1	Metabolism: 1CC: unassigned	-2.0409	-1.244
WBGene00011798	T16G1.4	Unassigned: regulated by multiple stresses	-2.0321	-2.0467
WBGene00020394	T10B5.8	Unassigned	-2.0107	-1.3148
WBGene00017658	F21C10.9	Unassigned	-2.003	-2.4616
WBGene00008594	clec-57	Stress response: C-type Lectin	-1.5142	-2.6091
WBGene00020895	T28D9.3	Signaling: lipid: phosphatase	-1.456	-1.4108
WBGene00015930	C17H12.4	Metabolism: unassigned	-1.4358	-1.1812
WBGene00020471	pho-14	Lysosome: acid phosphatase	-1.4167	-1.0207
WBGene00010128	F55G11.8	Stress response: pathogen: CUB	1.4095	-1.5296
WBGene00016061	hpo-15	Metabolism: unassigned	1.4451	1.0916
WBGene00007875	dod-24	Stress response: pathogen: unassigned	1.5341	-1.6315
WBGene00019021	F57H12.6	Unassigned: regulated by multiple stresses	1.5924	-3.1904
WBGene00001786	gst-38	Stress response: detoxification: GST	1.6538	-2.404
WBGene00008584	irg-4	Stress response: pathogen: CUB	2.1335	-1.1271
WBGene00012947	Y47H9C.1	Unassigned: regulated by multiple stresses	2.3014	-1.5419
WBGene00001477	fmo-2	Metabolism: FMO	4.0261	4.654

## Sheet: H. dbl-1(-) Sm vs dbl-1(-) Ef
H. Overlapping genes between panels B and E
Gene_id	Gene name	Functional Category	log2FoldChange [dbl-1(-)_Sm/ dbl-1(-)_OP50]	log2FoldChange [dbl-1(-)_Ef/ dbl-1(-)_OP50]
WBGene00002260	lbp-8	Metabolism: lipid: binding	-5.0809	-2.947
WBGene00022261	clec-210	Stress response: C-type Lectin	-5.4354	-1.9542
WBGene00010411	H25K10.1	Lysosome: acid phosphatase	-2.4792	-1.5808
WBGene00011800	T16G1.6	Unassigned	-2.0841	-1.2699
WBGene00000784	cpr-4	Proteolysis general: aspartate: cathepsin	1.5653	2.1076
WBGene00013900	ugt-18	Stress response: detoxification: ugt	3.6324	2.2797
WBGene00008357	nspc-16	Unassigned	1.6787	2.2839
WBGene00001477	fmo-2	Metabolism: FMO	4.9572	4.0586
WBGene00044447	ZK688.10	Transmembrane protein: unassigned	5.5283	6.5288
