# Supplementary material for: The DBL-1/TGF-β signaling pathway tailors behavioral and molecular host responses to a variety of bacteria in Caenorhabditis elegans
Source: eLife. 2023 Sep 26;12:e75831. doi: 10.7554/eLife.75831 (PMC10567113; doi:10.7554/eLife.75831)
Supplement: Figure 6—source data 1. [file elife-75831-fig6-data1.xlsx]

## Sheet: Figure 6A source data
Gene_id	Gene Name	Functional Category	readcount_dbl-1(-) E. coli OP50	readcount_WT E. coli OP50	log2FoldChange	pval	padj
WBGene00015605	C08E3.13	Signaling: TGF beta	1.86541	149.931	-6.3287	1.3689e-13	3.5527e-10
WBGene00000936	dbl-1	Signaling: TGF beta	5.68063	303.68	-5.7404	1.388e-15	5.4036e-12
WBGene00014760	F46A8.2	Pseudogene	0.478318	15.3974	-5.0086	3.5344e-05	0.01045
WBGene00008905	F17B5.1	Unassigned: regulated by multiple stresses	3.36523	72.7878	-4.4349	4.0715e-12	9.5102e-09
WBGene00008698	F11D11.3	Stress response: pathogen: unassigned	0.90877	17.7172	-4.2851	0.00011087	0.024902
WBGene00015398	tag-293	Transmembrane protein: seven transmembrane receptor: unassigned	8.12705	139.01	-4.0963	1.0785e-06	0.00062978
WBGene00017225	fbxa-52	Proteolysis proteasome: E3: F box	4.1695	69.0912	-4.0506	7.8868e-11	1.4171e-07
WBGene00008584	irg-4	Stress response: pathogen: CUB	208.119	2945.53	-3.823	1.2338e-18	9.178e-15
WBGene00219687	linc-12	Non-coding RNA: linc	4.84148	60.6456	-3.6469	3.3175e-09	4.305e-06
WBGene00016645	C44C1.6	Unassigned: regulated by multiple stresses	10.4377	93.1446	-3.1577	0.00011377	0.02507
WBGene00013007	Y48E1B.8	Transmembrane protein: unassigned	39.6227	345.1	-3.1226	3.0235e-14	8.828e-11
WBGene00000030	abu-7	Unassigned	4.33485	37.1064	-3.0976	6.995e-06	0.0027232
WBGene00015225	B0507.8	Cytoskeleton: unassigned	3.71602	31.515	-3.0842	3.3881e-05	0.010146
WBGene00235158	Y37E3.30	Unassigned	12.6804	105.997	-3.0634	9.7799e-10	1.3438e-06
WBGene00013592	Y81G3A.4	Unassigned: regulated by multiple stresses	3.20938	25.3953	-2.9842	0.0001176	0.025434
WBGene00001399	fat-7	Metabolism: lipid: fatty acid	77.7838	610.946	-2.9735	2.5587e-15	8.5379e-12
WBGene00009750	F46A8.7	Unassigned: regulated by multiple stresses	15.435	120.201	-2.9612	3.1673e-08	2.9592e-05
WBGene00194699	Y43F8B.22	Unassigned	4.7092	36.4906	-2.954	2.4433e-05	0.0077122
WBGene00044137	F28H6.8	Unassigned: regulated by multiple stresses	4.51681	32.635	-2.853	1.4543e-05	0.0049954
WBGene00021580	clec-174	Stress response: C-type Lectin	30.1131	192.764	-2.6784	5.3068e-10	7.7473e-07
WBGene00012456	Y17D7C.2	Unassigned	7.56779	48.0506	-2.6666	1.278e-05	0.0044554
WBGene00022730	ZK402.3	Unassigned	8.69982	54.9402	-2.6588	3.9037e-06	0.0018609
WBGene00016553	mir-8199	Non-coding RNA: miRNA	25.0283	155.845	-2.6385	4.8875e-09	5.5304e-06
WBGene00008447	E01G4.5	Unassigned: regulated by multiple stresses	129.975	796.734	-2.6159	8.1538e-08	7.0539e-05
WBGene00022339	Y82E9BR.6	Unassigned	26.2418	150.212	-2.5171	4.353e-07	0.00030608
WBGene00017104	E02H9.6	Transmembrane protein: unassigned	14.5127	82.4355	-2.5059	4.4553e-07	0.00030608
WBGene00022731	ZK402.5	Unassigned	5.65232	31.5523	-2.4808	0.0001131	0.02507
WBGene00050903	Y17D7C.4	Pseudogene	12.1064	66.9617	-2.4676	5.5957e-06	0.002334
WBGene00219728	linc-16	Non-coding RNA: linc	25.9519	136.184	-2.3916	1.0684e-07	8.4934e-05
WBGene00009710	F44G3.10	Cytoskeleton: claudin	37.1247	188.826	-2.3466	1.0635e-05	0.0038815
WBGene00016037	dop-6	Neuronal function: synaptic function: neurotransmitter receptor	31.5421	153.513	-2.283	0.0002691	0.047618
WBGene00008625	scl-14	Extracellular material: secreted protein	8.76248	42.2516	-2.2696	8.242e-05	0.019645
WBGene00194680	Y17D7C.6	Unassigned	11.9688	57.3694	-2.261	4.9125e-05	0.01275
WBGene00021018	W04B5.1	Pseudogene	27.6837	130.548	-2.2375	1.3658e-06	0.00070894
WBGene00044728	Y53F4B.45	Non-coding RNA: ncRNA	1325.18	6088.14	-2.1998	3.9496e-10	6.1503e-07
WBGene00000718	col-145	Extracellular material: collagen	25.0849	113.039	-2.1719	5.0663e-06	0.0021914
WBGene00010034	F54B11.11	Stress response: pathogen: unassigned	23.966	105.003	-2.1314	6.5886e-06	0.0026084
WBGene00011844	T19C9.8	Stress response: pathogen: CUB	40.7359	169.685	-2.0585	3.9123e-07	0.00028557
WBGene00185076	Y7A9A.79	Non-coding RNA: ncRNA	32.4895	132.277	-2.0255	1.9946e-06	0.00099126
WBGene00016450	clec-5	Stress response: C-type Lectin	52.9208	214.286	-2.0176	5.82e-07	0.00036742
WBGene00009824	gpdh-1	Metabolism: lipid: phospholipid	23.5716	89.7306	-1.9286	4.4445e-05	0.011933
WBGene00016635	C44B11.6	Unassigned	58.5932	222.461	-1.9248	1.0166e-06	0.00060885
WBGene00001695	grd-6	Signaling: hedgehog-like	95.5991	356.145	-1.8974	2.7541e-06	0.0013402
WBGene00003876	pept-2	Transmembrane transport: amino acid	545.377	1994.1	-1.8704	3.4213e-08	3.0737e-05
WBGene00014562	Y17D7B.7	Pseudogene	30.8821	111.275	-1.8493	2.2481e-05	0.0071933
WBGene00003554	nas-38	Proteolysis general: metallopeptidase	43.7725	155.126	-1.8253	2.645e-05	0.0081292
WBGene00009515	clec-170	Stress response: C-type Lectin	46.5126	164.799	-1.825	1.2511e-05	0.0044277
WBGene00015403	clec-10	Stress response: C-type Lectin	130.289	450.723	-1.7905	1.1466e-06	0.00063128
WBGene00001730	grl-21	Signaling: hedgehog-like	72.2405	248.292	-1.7812	8.8421e-06	0.0032783
WBGene00018031	F35B3.4	Unassigned: regulated by multiple stresses	69.2352	232.195	-1.7458	6.2235e-05	0.015465
WBGene00045410	E01G4.7	Pseudogene	105.251	351.753	-1.7407	4.1447e-05	0.011525
WBGene00000402	cdh-10	Cytoskeleton: cadherin	320.097	1045.19	-1.7072	5.2245e-05	0.01341
WBGene00000649	col-73	Extracellular material: collagen	1520.01	4927.19	-1.6967	0.00017232	0.034111
WBGene00003958	pcp-3	Proteolysis general: serine	553.164	1769.88	-1.6779	1.3411e-06	0.00070894
WBGene00016577	clec-3	Stress response: C-type Lectin	44.7756	142.683	-1.672	3.6927e-05	0.010654
WBGene00001548	gcy-23	Signaling: heteromeric G protein: guanylyl cyclase	41.7586	126.242	-1.596	0.00012647	0.026613
WBGene00001068	dpy-6	Extracellular material: PGI	469.902	1410.12	-1.5854	1.5033e-05	0.0050888
WBGene00000753	col-180	Extracellular material: collagen	229.704	678.435	-1.5624	0.00010654	0.024397
WBGene00000699	col-125	Extracellular material: collagen	2559.44	7465.14	-1.5443	3.8855e-05	0.011068
WBGene00007963	cyp-25A1	Stress response: detoxification: CYP	60.6057	170.68	-1.4938	0.00018603	0.03556
WBGene00002055	ifc-1	Cytoskeleton: intermediate filament protein	694.143	1939.42	-1.4823	1.5786e-05	0.0052676
WBGene00004230	ptr-16	Signaling: hedgehog-like	149.28	414.288	-1.4726	0.00021917	0.039995
WBGene00012452	Y17D7B.4	Unassigned: regulated by multiple stresses	180.283	497.449	-1.4643	6.7537e-05	0.016433
WBGene00008652	F10D11.6	Development: general	772.809	2126.86	-1.4605	0.00010888	0.02469
WBGene00011235	suro-1	Proteolysis general: carboxypeptidase	362.75	995.269	-1.4561	0.00016228	0.032676
WBGene00020360	math-41	Unassigned: meprin-associated Traf homology domain	269.431	724.702	-1.4275	7.8361e-05	0.01887
WBGene00008583	ugt-65	Stress response: detoxification: ugt	76.2492	205.058	-1.4272	0.00025527	0.046221
WBGene00017658	F21C10.9	Unassigned	380.013	1020.04	-1.4245	0.00025862	0.046468
WBGene00008594	clec-57	Stress response: C-type Lectin	283.782	759.211	-1.4197	5.3401e-05	0.013558
WBGene00018393	msra-1	Metabolism: 1CC: unassigned	2075.94	5524.23	-1.412	4.6295e-05	0.012288
WBGene00015993	C18H7.1	Unassigned: regulated by multiple stresses	235.69	621.494	-1.3989	0.0001065	0.024397
WBGene00000717	col-144	Extracellular material: collagen	2625.59	6891.79	-1.3922	9.1398e-05	0.021564
WBGene00000594	col-3	Extracellular material: collagen	592.787	1548.96	-1.3857	0.00015079	0.030896
WBGene00004000	pgp-6	Transmembrane transport: ABC	110.308	287.501	-1.382	0.00018878	0.03556
WBGene00001397	fat-5	Metabolism: lipid: fatty acid	360.001	934.87	-1.3768	6.4911e-05	0.01596
WBGene00000740	col-167	Extracellular material: collagen	2166.24	5501.43	-1.3446	0.00017484	0.034318
WBGene00000785	cpr-5	Proteolysis general: cysteine: unassigned	3395.95	8611.28	-1.3424	4.3979e-05	0.011933
WBGene00010661	tyr-2	Neuronal function: synaptic function: neurotransmitter metabolism	453.775	1134.07	-1.3215	0.00026118	0.04657
WBGene00000784	cpr-4	Proteolysis general: aspartate: cathepsin	2996.21	7186.58	-1.2622	0.00018765	0.03556
WBGene00011668	clec-47	Stress response: C-type Lectin	311.451	745.012	-1.2583	0.00012256	0.026263
WBGene00022822	ZK813.3	Unassigned	8850.4	3635.12	1.2837	0.00020082	0.037228
WBGene00010196	F57C2.4	Unassigned	2263.57	925.706	1.29	0.0001247	0.026479
WBGene00020869	T28A11.2	Unassigned: regulated by multiple stresses	1387.66	567.048	1.2911	0.0001949	0.03642
WBGene00011124	sdz-27	Development: apoptosis	779.773	318.257	1.2929	0.00018776	0.03556
WBGene00011979	sysm-1	Stress response: pathogen: ShK	2832.26	1087.6	1.3808	9.5202e-05	0.022237
WBGene00010613	K07A1.6	Proteolysis general: inhibitor: TIL domain	347.092	131.533	1.3999	0.00011679	0.025434
WBGene00001390	far-6	Metabolism: lipid: binding	2677.87	1014.29	1.4006	4.3016e-05	0.011821
WBGene00003091	lys-2	Proteolysis general: lysozyme	5857.69	2175.36	1.4291	4.8545e-05	0.012741
WBGene00000298	cat-4	Neuronal function: synaptic function: neurotransmitter metabolism	2202.87	815.145	1.4343	3.9824e-05	0.011207
WBGene00011540	T06E6.10	Unassigned: regulated by multiple stresses	323.565	118.966	1.4435	0.00016521	0.032982
WBGene00016474	C36C5.5	Unassigned: regulated by multiple stresses	192.658	70.7376	1.4455	0.00021412	0.039382
WBGene00013391	Y62H9A.3	Unassigned	4130.31	1504.64	1.4568	2.5657e-05	0.0079907
WBGene00005552	sri-40	Transmembrane protein: seven transmembrane receptor: sri	647.501	228.133	1.505	1.8411e-05	0.0060571
WBGene00009110	F25D1.5	Metabolism: lipid: sterol	342.134	119.921	1.5125	0.00012835	0.026767
WBGene00007507	C10C5.3	Metabolism: amino acid: unassigned	243.401	84.5752	1.525	0.00014384	0.029733
WBGene00022653	ZK105.1	Unassigned: regulated by multiple stresses	2376.43	820.362	1.5345	4.3208e-06	0.0019789
WBGene00007102	B0024.13	Metabolism: lipid: sterol	1848.18	635.472	1.5402	1.2421e-05	0.0044277
WBGene00235094	K08D9.9	Unassigned	359.288	123.271	1.5433	3.6945e-05	0.010654
WBGene00011892	erh-1	Unassigned	2179.35	724.833	1.5882	5.3323e-06	0.0022646
WBGene00008393	D1086.6	Unassigned: regulated by multiple stresses	742.724	243.586	1.6084	6.4676e-06	0.0026047
WBGene00007649	C17G1.2	Transmembrane protein: unassigned	877.309	285.89	1.6176	4.2989e-06	0.0019789
WBGene00007097	B0024.4	Stress response: pathogen: unassigned	646.341	209.822	1.6231	4.9747e-06	0.0021914
WBGene00003096	lys-7	Stress response: pathogen: lysozyme	8494.14	2593.43	1.7116	1.1621e-06	0.00063128
WBGene00020763	ztf-18	Nucleic acid: binding: zinc finger	1675.8	508.616	1.7202	1.1236e-06	0.00063128
WBGene00019622	K10C2.7	Unassigned: regulated by multiple stresses	119.319	33.0498	1.8521	1.9273e-05	0.0062526
WBGene00013484	Y69H2.9	Transmembrane protein: unassigned	176.064	48.1798	1.8696	4.7632e-06	0.0021396
WBGene00012213	W02D9.7	Unassigned: regulated by multiple stresses	3143.86	815.125	1.9474	2.8564e-08	2.8473e-05
WBGene00022821	ZK813.2	Unassigned: regulated by multiple stresses	2831.95	673.791	2.0714	4.3844e-09	5.39e-06
WBGene00020616	T20D4.10	Unassigned: regulated by multiple stresses	76.7993	16.1604	2.2486	1.6139e-06	0.0008195
WBGene00077673	B0563.10	Unassigned	46.483	9.47866	2.2939	6.1837e-05	0.015465
WBGene00019593	K09F6.10	Unassigned: regulated by multiple stresses	631.873	124.811	2.3399	0.00017851	0.034747
WBGene00017660	F21C10.11	Unassigned: regulated by multiple stresses	103.066	19.83	2.3778	1.3521e-07	0.00010188
WBGene00020617	T20D4.11	Unassigned: regulated by multiple stresses	178.693	33.7093	2.4063	2.4901e-08	2.6438e-05
WBGene00012212	W02D9.6	Unassigned: regulated by multiple stresses	711.108	131.453	2.4355	3.5792e-11	6.9668e-08
WBGene00021118	clec-125	Stress response: C-type Lectin	68.4731	11.1098	2.6237	6.5522e-07	0.00040275
WBGene00000560	cnc-6	Stress response: pathogen: caenacin	54.4986	7.1681	2.9266	8.5688e-08	7.1482e-05
WBGene00015878	C17B7.4	Unassigned	40.4459	4.2876	3.2378	5.1033e-07	0.00034058
WBGene00019576	lido-5	Unassigned: regulated by multiple stresses	123.551	11.8749	3.3791	7.0314e-12	1.4931e-08
WBGene00008295	nlp-39	Neuronal function: synaptic function: neuropeptide	42.7309	3.65739	3.5464	0.00015713	0.031916
WBGene00000133	amt-1	Transmembrane transport: ammonium	104.411	8.29521	3.6539	8.5132e-06	0.0032073
WBGene00018225	nep-14	Pseudogene	49.2384	3.89062	3.6617	4.9721e-09	5.5304e-06
WBGene00007829	oac-5	Metabolism: lipid: o-acyl transferase	31.3257	1.93329	4.0182	5.668e-07	0.00036742
WBGene00009423	F35E8.10	Unassigned: regulated by multiple stresses	33.0587	1.31753	4.6491	2.9256e-08	2.8473e-05
WBGene00005064	sra-38	Transmembrane protein: seven transmembrane receptor: sra	40.2592	1.49705	4.7491	1.0463e-10	1.7457e-07
WBGene00020881	T28A11.19	Unassigned: regulated by multiple stresses	136.97	4.05305	5.0787	4.0662e-20	9.4979e-16
WBGene00045238	rpr-1	Non-coding RNA: ncRNA	1001.07	25.0007	5.3234	6.2712e-06	0.0025699
WBGene00007729	clec-185	Stress response: C-type Lectin	636.888	13.6134	5.5479	1.0909e-07	8.4934e-05
WBGene00219308	W06G6.20	Unassigned	18.5773	0.374263	5.6333	7.8391e-06	0.0030017
WBGene00005065	sra-39	Transmembrane protein: seven transmembrane receptor: sra	100.78	1.80052	5.8066	2.5061e-19	2.9269e-15
WBGene00018911	F56A4.3	Stress response: detoxification: GST	0	159.404	NA	2.7822e-17	1.2997e-13
WBGene00022292	Y75D11A.3	Unassigned: regulated by multiple stresses	0	219.559	NA	1.5717e-18	9.178e-15
WBGene00044896	K12C11.5	Unassigned	0	12.8731	NA	2.8784e-05	0.0087315

## Sheet: Figure 6B source data
Gene_id	Gene Name	Functional Category	readcount_dbl-1(-) S. marcescens	readcount_WT S. marcescens	log2FoldChange	pval	padj
WBGene00015605	C08E3.13	Signaling: TGF beta	0.320786	313.022	-9.9304	5.48e-08	2.97e-05
WBGene00000936	dbl-1	Signaling: TGF beta	5.26626	309.009	-5.8747	7.3e-18	2.17e-14
WBGene00008584	irg-4	Stress response: pathogen: CUB	461.514	14147.3	-4.938	1.34e-51	3.19e-47
WBGene00044137	F28H6.8	Unassigned: regulated by multiple stresses	1.31563	34.3702	-4.7073	6.64e-10	5.65e-07
WBGene00017225	fbxa-52	Proteolysis proteasome: E3: F box	5.5833	81.7433	-3.8719	2.8e-14	4.77e-11
WBGene00009746	F46A8.3	Extracellular material: galectin	1.72081	24.938	-3.8572	0.00032202	0.038585
WBGene00011046	R05H10.7	Unassigned: regulated by multiple stresses	1.04676	14.3868	-3.7807	0.00012651	0.019435
WBGene00194667	Y105C5A.1271	Pseudogene	2.16167	27.7256	-3.681	3.43e-07	0.00014115
WBGene00009748	F46A8.5	Extracellular material: galectin	2.29423	28.4473	-3.6322	9.42e-07	0.00032094
WBGene00009749	F46A8.6	Unassigned: regulated by multiple stresses	2.09351	23.5696	-3.4929	1.13e-05	0.0026382
WBGene00014760	F46A8.2	Pseudogene	3.12084	30.3529	-3.2818	1.03e-06	0.00034684
WBGene00001399	fat-7	Metabolism: lipid: fatty acid	95.1671	766.861	-3.0104	3.31e-16	7.9e-13
WBGene00020674	T22B7.7	Metabolism: lipid: beta oxidation	11.7025	91.6223	-2.9689	8.02e-12	8.69e-09
WBGene00009747	F46A8.4	Extracellular material: galectin	3.90191	28.9736	-2.8925	5.49e-05	0.010392
WBGene00194680	Y17D7C.6	Unassigned	8.50604	61.2197	-2.8474	4.14e-05	0.0082862
WBGene00022339	Y82E9BR.6	Unassigned	27.5644	185.141	-2.7478	3.78e-09	2.82e-06
WBGene00045417	Y37H2A.13	Unassigned: regulated by multiple stresses	4.89994	32.7578	-2.741	5.89e-05	0.010893
WBGene00016645	C44C1.6	Unassigned: regulated by multiple stresses	14.23	84.8766	-2.5764	4e-09	2.89e-06
WBGene00219687	linc-12	Non-coding RNA: linc	6.99638	39.7711	-2.507	0.00015656	0.022088
WBGene00045455	F26G1.11	Unassigned	7.019	38.6983	-2.4629	6.46e-05	0.011544
WBGene00194821	dmsr-16	Transmembrane protein: seven transmembrane receptor: dmsr	4.62788	25.0025	-2.4336	0.00014224	0.020681
WBGene00015398	tag-293	Transmembrane protein: seven transmembrane receptor: unassigned	8.41584	45.1437	-2.4233	4.32e-06	0.0011974
WBGene00003734	nhx-6	Transmembrane transport: sodium channel	391.918	2066.87	-2.3988	6.89e-05	0.0119
WBGene00007963	cyp-25A1	Stress response: detoxification: CYP	81.5042	422.837	-2.3752	3.84e-07	0.00014842
WBGene00019746	M03A1.3	Stress response: unassigned	10.5189	53.4021	-2.3439	1.66e-06	0.00052845
WBGene00015338	catp-2	Transmembrane transport: unassigned	743.127	3708.57	-2.3192	7.66e-15	1.41e-11
WBGene00022495	fbxa-78	Proteolysis proteasome: E3: F box	4.94548	24.4999	-2.3086	0.0003337	0.039586
WBGene00003356	mir-262	Non-coding RNA: miRNA	5.21754	25.5446	-2.2916	0.00044901	0.049392
WBGene00013637	Y105C5A.13	Unassigned: regulated by multiple stresses	14.6578	70.41	-2.2641	1.16e-05	0.0026823
WBGene00009750	F46A8.7	Unassigned: regulated by multiple stresses	42.2969	200.799	-2.2471	2.34e-05	0.0049922
WBGene00235158	Y37E3.30	Unassigned	20.0821	92.4013	-2.202	1.46e-07	6.89e-05
WBGene00219755	linc-17	Non-coding RNA: linc	10.717	49.0917	-2.1956	8.3e-06	0.0020614
WBGene00008447	E01G4.5	Unassigned: regulated by multiple stresses	135.321	615.872	-2.1862	4.21e-06	0.001195
WBGene00020352	T08B6.2	Pseudogene	7.0909	31.5547	-2.1538	0.00019544	0.025889
WBGene00014562	Y17D7B.7	Pseudogene	36.497	162.227	-2.1522	9.48e-08	4.63e-05
WBGene00050903	Y17D7C.4	Pseudogene	17.9199	79.2846	-2.1455	8.53e-06	0.0020972
WBGene00219758	linc-11	Non-coding RNA: linc	30.8241	135.783	-2.1392	1.19e-08	7.45e-06
WBGene00008593	clec-227	Stress response: C-type Lectin	10.6001	46.627	-2.1371	1.86e-05	0.0041493
WBGene00014985	NA	NA	48.6158	200.422	-2.0435	2.17e-05	0.0046706
WBGene00003876	pept-2	Transmembrane transport: amino acid	578.957	2346.31	-2.0189	1.88e-12	2.24e-09
WBGene00020728	T23E1.1	Transmembrane protein: unassigned	8.18582	33.1685	-2.0186	0.00034416	0.040424
WBGene00001786	gst-38	Stress response: detoxification: GST	141.43	566.839	-2.0028	1.33e-09	1.05e-06
WBGene00045410	E01G4.7	Pseudogene	64.738	257.972	-1.9945	4.57e-09	3.11e-06
WBGene00017104	E02H9.6	Transmembrane protein: unassigned	19.949	78.5393	-1.9771	3.09e-06	0.00089802
WBGene00219728	linc-16	Non-coding RNA: linc	23.5757	90.4581	-1.94	8.3e-05	0.013655
WBGene00012141	NA	NA	30.8612	109.585	-1.8282	0.00032746	0.03904
WBGene00012631	vmo-1	Extracellular material: matrix	11.398	39.9342	-1.8088	0.00033705	0.039785
WBGene00021018	W04B5.1	Pseudogene	40.7377	141.319	-1.7945	7.12e-07	0.00025356
WBGene00012456	Y17D7C.2	Unassigned	16.6341	57.4602	-1.7884	0.0004424	0.049063
WBGene00015403	clec-10	Stress response: C-type Lectin	204.547	706.451	-1.7882	2.64e-07	0.00011434
WBGene00008816	F14F8.8	Unassigned: regulated by multiple stresses	20.4029	70.4133	-1.7871	8.7e-05	0.014119
WBGene00009710	F44G3.10	Cytoskeleton: claudin	61.524	211.036	-1.7783	2.02e-07	9.27e-05
WBGene00194928	ZC513.14	Unassigned	13.2412	45.4028	-1.7777	0.00026488	0.033067
WBGene00012123	T28D6.3	Unassigned: regulated by multiple stresses	97.9875	335.615	-1.7761	1.3e-08	7.93e-06
WBGene00185076	Y7A9A.79	Non-coding RNA: ncRNA	40.5007	137.075	-1.7589	2.3e-06	0.00071075
WBGene00008594	clec-57	Stress response: C-type Lectin	86.5793	292.197	-1.7548	7.02e-08	3.72e-05
WBGene00235114	ZK105.13	Unassigned	17.334	58.1288	-1.7456	9.31e-05	0.014997
WBGene00022730	ZK402.3	Unassigned	18.1638	60.5254	-1.7365	6.82e-05	0.0119
WBGene00015342	C02E7.10	Transmembrane protein: unassigned	770.992	2520.35	-1.7088	4.64e-06	0.001257
WBGene00011844	T19C9.8	Stress response: pathogen: CUB	75.2742	245.163	-1.7035	3.55e-07	0.00014352
WBGene00001387	far-3	Metabolism: lipid: binding	114.26	359.249	-1.6527	3.86e-07	0.00014842
WBGene00194681	F40D4.16	Non-coding RNA: ncRNA	38.6279	121.182	-1.6495	0.00028222	0.034509
WBGene00010127	F55G11.7	Stress response: pathogen: CUB	28.3294	88.5777	-1.6446	4.83e-05	0.0095137
WBGene00004176	srlf-36	Unassigned: prion domain	37.1499	114.569	-1.6248	1.97e-05	0.0043012
WBGene00001730	grl-21	Signaling: hedgehog-like	164.744	501.75	-1.6067	2.69e-07	0.00011462
WBGene00007544	fipr-6	Unassigned: regulated by multiple stresses	52.19	155.734	-1.5772	0.00015363	0.021908
WBGene00014505	T05E11.9	Non-coding RNA: ncRNA	3403.05	10149.6	-1.5765	2.25e-08	1.34e-05
WBGene00016635	C44B11.6	Unassigned	75.7592	224.401	-1.5666	2.74e-06	0.0008162
WBGene00045207	F13E9.14	Unassigned	27.2763	80.1641	-1.5553	0.00013529	0.019913
WBGene00020938	clec-218	Stress response: C-type Lectin	33.9939	98.8629	-1.5402	8e-05	0.013239
WBGene00044728	Y53F4B.45	Non-coding RNA: ncRNA	3005.13	8697.59	-1.5332	8.86e-08	4.49e-05
WBGene00003958	pcp-3	Proteolysis general: serine	634.32	1812.46	-1.5147	8.52e-05	0.013911
WBGene00010507	K02E2.6	Proteolysis general: aspartate: unassigned	94.7036	258.843	-1.4506	9.39e-06	0.0022393
WBGene00014955	Y102A5C.6	Pseudogene	285.945	777.244	-1.4426	8.15e-07	0.00028446
WBGene00219707	linc-8	Non-coding RNA: linc	93.1492	247.006	-1.4069	1.37e-05	0.003146
WBGene00001150	ech-1.1	Metabolism: lipid: beta oxidation	47.2264	120.896	-1.3561	0.00021205	0.027479
WBGene00011190	swt-6	Transmembrane transport: sugar	232.524	588.482	-1.3396	1.94e-05	0.0042742
WBGene00012452	Y17D7B.4	Unassigned: regulated by multiple stresses	242.513	607.732	-1.3254	0.00012788	0.019435
WBGene00044213	Y102A5C.36	Unassigned	50.8569	127.165	-1.3222	0.00016045	0.022505
WBGene00000731	col-158	Extracellular material: collagen	68.8966	170.179	-1.3046	0.00010434	0.016586
WBGene00011668	clec-47	Stress response: C-type Lectin	72.2265	178.224	-1.3031	0.00012797	0.019435
WBGene00002055	ifc-1	Cytoskeleton: intermediate filament protein	997.851	2454.15	-1.2983	7.28e-06	0.0018476
WBGene00021070	cpr-8	Proteolysis general: aspartate: cathepsin	89.115	216.387	-1.2799	0.00044188	0.049063
WBGene00019564	K09D9.1	Unassigned	50.5201	118.328	-1.2279	0.00039377	0.044925
WBGene00013638	Y105C5A.14	Pseudogene	120.15	279.496	-1.218	0.00010887	0.017191
WBGene00007957	C35C5.8	Unassigned: regulated by multiple stresses	82.6056	189.836	-1.2004	0.00024801	0.031455
WBGene00017881	asp-13	Proteolysis general: aspartate: cathepsin	1326.22	2968.9	-1.1626	0.00023965	0.030721
WBGene00001397	fat-5	Metabolism: lipid: fatty acid	299.681	664.863	-1.1496	0.00012006	0.018711
WBGene00014666	C05D12.3	Metabolism: amino sugar	1644.14	3644.28	-1.1483	7.13e-05	0.012149
WBGene00019400	K04G7.1	Development: somatic	1488.41	3257.22	-1.1299	7.27e-05	0.012213
WBGene00009008	F21D5.3	Unassigned	610.943	1335.44	-1.1282	0.000132	0.019677
WBGene00020141	lmd-5	Extracellular material: chitinase	243.83	519.134	-1.0902	0.00045628	0.049906
WBGene00019963	rips-1	Protein modification: methyltransferase	1855.45	3944.28	-1.088	6.48e-05	0.011544
WBGene00008296	cdr-2	Stress response: heavy metal	360.422	764.6	-1.085	0.00018951	0.025821
WBGene00012139	T28F4.4	Unassigned	313.478	662.919	-1.0805	0.00025293	0.031742
WBGene00008629	cpt-5	Metabolism: lipid: beta oxidation	201.032	423.655	-1.0755	0.00039378	0.044925
WBGene00018803	fbxa-24	Proteolysis proteasome: E3: F box	865.259	1816.89	-1.0703	0.00020659	0.027066
WBGene00007807	C29F3.7	Stress response: pathogen: CUB	1595.43	3213.43	-1.0102	0.00036566	0.042324
WBGene00005002	spp-17	Unassigned: regulated by multiple stresses	3967.32	7964.29	-1.0054	0.00028615	0.034811
WBGene00020579	T19D12.4	Stress response: pathogen: unassigned	1724.15	3453.56	-1.0022	0.00039792	0.045181
WBGene00017541	F17E9.4	Unassigned: regulated by multiple stresses	1745.84	889.185	0.97336	0.00042769	0.048103
WBGene00017691	ilys-5	Proteolysis general: lysozyme	10147.7	5089.38	0.99559	0.00045839	0.049908
WBGene00007070	ugt-49	Stress response: detoxification: ugt	1026.08	513.323	0.99921	0.00039164	0.044925
WBGene00010196	F57C2.4	Unassigned	2426.32	1208.11	1.006	0.00022469	0.028959
WBGene00004157	pqn-75	Unassigned: prion domain	659.502	326.679	1.0135	0.00043664	0.048879
WBGene00000200	arx-2	Cytoskeleton: actin function: actin	5154.04	2537.64	1.0222	0.0002917	0.035306
WBGene00044206	T26H5.9	Unassigned: regulated by multiple stresses	689.454	335.197	1.0404	0.00019653	0.025889
WBGene00022822	ZK813.3	Unassigned	8466.81	4099.73	1.0463	0.00019531	0.025889
WBGene00016638	perm-4	Development: general	31538.9	14956	1.0764	0.00012689	0.019435
WBGene00009634	nspc-9	Unassigned	864.749	409.554	1.0782	0.00031196	0.037568
WBGene00007099	trx-2	Stress response: thioredoxin	1282.33	605.386	1.0828	0.0001391	0.020347
WBGene00011894	ttr-23	Unassigned: regulated by multiple stresses	799.387	376.761	1.0852	0.00019275	0.025889
WBGene00010007	F53H4.2	Unassigned	2171.64	1012.49	1.1009	3.99e-05	0.0080554
WBGene00013391	Y62H9A.3	Unassigned	2909.74	1354.63	1.103	9.92e-05	0.015873
WBGene00018184	F38E9.1	Signaling: lipid: phospholipase C	687.206	317.183	1.1154	0.00017586	0.024379
WBGene00011892	erh-1	Unassigned	1861.27	857.018	1.1189	5.07e-05	0.0099076
WBGene00000094	agt-2	DNA: repair	469.153	213.533	1.1356	0.00015028	0.021585
WBGene00009291	clec-264	Stress response: C-type Lectin	253.623	114.751	1.1442	0.0002518	0.031742
WBGene00003651	nhr-61	Transcription factor: NHR	916.854	413.803	1.1477	7.07e-05	0.012122
WBGene00045261	H29C22.1	Unassigned: regulated by multiple stresses	952.76	428.345	1.1533	0.0004098	0.04631
WBGene00008394	D1086.7	Transmembrane protein: unassigned	723.091	324.885	1.1542	5.19e-05	0.010052
WBGene00003096	lys-7	Stress response: pathogen: lysozyme	16538.5	7305.86	1.1787	3.54e-05	0.0072136
WBGene00007950	C35A5.6	NA	263.118	115.663	1.1858	0.00018073	0.024909
WBGene00004908	snf-9	Transmembrane transport: solute carrier	274.805	120.364	1.191	6.65e-05	0.011739
WBGene00009637	nspc-13	Unassigned: regulated by multiple stresses	766.762	334.438	1.197	7.25e-05	0.012213
WBGene00007507	C10C5.3	Metabolism: amino acid: unassigned	198.41	86.3106	1.2009	0.00044951	0.049392
WBGene00008139	C47D12.5	Transmembrane protein: unassigned	333.398	143.403	1.2172	5.49e-05	0.010392
WBGene00007102	B0024.13	Metabolism: lipid: sterol	1591.46	680.952	1.2247	2.02e-05	0.0043847
WBGene00020786	T25B2.2	Unassigned: regulated by multiple stresses	240.547	102.639	1.2287	0.00024222	0.030885
WBGene00012211	ssp-37	Stress response: pathogen: unassigned	195.556	81.9759	1.2543	0.00019408	0.025889
WBGene00021368	best-20	Transmembrane transport: chloride channel	239.504	98.7875	1.2777	6.2e-05	0.011278
WBGene00015780	C14F11.4	Unassigned: regulated by multiple stresses	373.239	152.916	1.2874	4.27e-05	0.0084752
WBGene00000298	cat-4	Neuronal function: synaptic function: neurotransmitter metabolism	1722.87	704.424	1.2903	4.28e-06	0.0011974
WBGene00044772	T23E7.6	Transmembrane protein: unassigned	187.315	76.481	1.2923	0.00019351	0.025889
WBGene00022440	Y110A2AL.3	Unassigned: regulated by multiple stresses	200.913	81.1173	1.3085	0.00014489	0.020938
WBGene00012886	Y45F10D.6	Unassigned: regulated by multiple stresses	93.0539	37.5206	1.3104	0.00028105	0.034509
WBGene00005552	sri-40	Transmembrane protein: seven transmembrane receptor: sri	560.567	222.985	1.3299	4.72e-06	0.0012635
WBGene00007919	cup-16	Trafficking: endocytosis: unassigned	442.33	172.891	1.3553	9.34e-06	0.0022393
WBGene00004457	rpm-1	Proteolysis proteasome: E3: unassigned	1552.37	597.131	1.3784	8.23e-07	0.00028446
WBGene00009640	nspc-10	Unassigned: regulated by multiple stresses	995.678	382.948	1.3785	3.16e-06	0.00090908
WBGene00008221	nhr-168	Transcription factor: NHR	252.036	95.6524	1.3978	2.74e-05	0.005782
WBGene00044554	F41E6.15	Unassigned	102.012	38.5707	1.4032	0.00013287	0.019677
WBGene00016102	C25F6.1	Unassigned: regulated by multiple stresses	232.36	87.2364	1.4134	1.67e-05	0.0037933
WBGene00015433	C04E12.2	Unassigned: regulated by multiple stresses	148.088	55.524	1.4153	0.00020913	0.027248
WBGene00010084	F55B11.2	Unassigned: regulated by multiple stresses	1722.36	641.165	1.4256	3.17e-07	0.00013263
WBGene00011252	R11H6.4	Unassigned: regulated by multiple stresses	124.02	46.0986	1.4278	7.79e-05	0.012982
WBGene00014152	ZK930.2	Nucleic acid: binding: zinc finger	359.41	132.655	1.4379	2.7e-06	0.00081442
WBGene00020386	dach-1	Stress response: detoxification: CYP	212.679	77.7634	1.4515	1.04e-05	0.0024549
WBGene00020763	ztf-18	Nucleic acid: binding: zinc finger	1559.64	559.401	1.4793	2.35e-07	0.0001039
WBGene00009130	F25H5.8	Transmembrane protein: unassigned	431.396	154.092	1.4852	6.7e-07	0.00024562
WBGene00013579	Y79H2A.2	Transmembrane protein: unassigned	99.6774	35.4305	1.4923	6.88e-05	0.0119
WBGene00022445	Y110A2AL.9	Unassigned: regulated by multiple stresses	276.147	96.9787	1.5097	2.9e-06	0.00085355
WBGene00044209	Y32F6A.6	Pseudogene	173.513	59.9922	1.5322	5.95e-05	0.010904
WBGene00009110	F25D1.5	Metabolism: lipid: sterol	173.802	58.5191	1.5705	6.1e-06	0.0015803
WBGene00001390	far-6	Metabolism: lipid: binding	3234.58	1087.35	1.5728	5.06e-08	2.81e-05
WBGene00012585	lips-15	Metabolism: lipid: lipase	1048.13	350.995	1.5783	5.23e-07	0.00019781
WBGene00022821	ZK813.2	Unassigned: regulated by multiple stresses	2205.03	737.102	1.5809	3.46e-08	1.96e-05
WBGene00010613	K07A1.6	Proteolysis general: inhibitor: TIL domain	379.347	126.63	1.5829	1.47e-07	6.89e-05
WBGene00017469	F14F9.6	Unassigned	79.8053	26.2696	1.6031	5.82e-05	0.010834
WBGene00016893	C53B7.2	Proteolysis general: inhibitor: TIL domain	653.41	214.706	1.6056	9.51e-08	4.63e-05
WBGene00013484	Y69H2.9	Transmembrane protein: unassigned	184.595	60.0085	1.6211	2.34e-06	0.00071413
WBGene00020869	T28A11.2	Unassigned: regulated by multiple stresses	1630.6	523.109	1.6402	0.00011103	0.017417
WBGene00021805	nspg-7.2	Unassigned: regulated by multiple stresses	67.5154	21.4993	1.6509	0.00035573	0.041578
WBGene00013329	Y57G11C.40	Unassigned: regulated by multiple stresses	70.3415	22.21	1.6632	5.3e-05	0.01019
WBGene00008027	scl-5	Extracellular material: secreted protein	520.443	161.984	1.6839	0.00016849	0.023494
WBGene00045245	ttr-34	Unassigned: TransThyretin-Related family domain	186.843	58.0297	1.687	3.86e-07	0.00014842
WBGene00194794	F45B8.5	Pseudogene	59.7771	18.3967	1.7001	0.00013073	0.019677
WBGene00012213	W02D9.7	Unassigned: regulated by multiple stresses	3172.09	950.093	1.7393	1.14e-09	9.36e-07
WBGene00000560	cnc-6	Stress response: pathogen: caenacin	42.0603	12.5799	1.7413	0.00013277	0.019677
WBGene00016474	C36C5.5	Unassigned: regulated by multiple stresses	169.13	50.0553	1.7565	6.99e-07	0.00025241
WBGene00044811	F12E12.11	Metabolism: lipid: sterol	178.541	52.3099	1.7711	2.35e-07	0.0001039
WBGene00044502	C46G7.5	Unassigned	119.57	33.4378	1.8383	1.48e-06	0.00047718
WBGene00008393	D1086.6	Unassigned: regulated by multiple stresses	892.421	241.664	1.8847	9.28e-09	6.15e-06
WBGene00020878	T28A11.16	Unassigned: regulated by multiple stresses	110.602	27.6188	2.0017	1.42e-06	0.00046408
WBGene00019970	R08F11.7	Unassigned	165.004	40.8476	2.0142	3.5e-05	0.0071952
WBGene00022653	ZK105.1	Unassigned: regulated by multiple stresses	3109.99	730.661	2.0896	3.21e-13	4.25e-10
WBGene00235164	K09F6.13	Unassigned	439.004	101.183	2.1173	2.72e-09	2.09e-06
WBGene00001158	ech-9	Metabolism: lipid: beta oxidation	779.96	160.391	2.2818	1.14e-11	1.13e-08
WBGene00019592	K09F6.9	Unassigned: regulated by multiple stresses	1234.43	253.769	2.2823	9.53e-11	9.09e-08
WBGene00010062	lipl-1	Metabolism: lipid: lipase	1281.6	250.884	2.3529	5.55e-12	6.3e-09
WBGene00012212	W02D9.6	Unassigned: regulated by multiple stresses	799.457	153.458	2.3812	4.92e-15	9.77e-12
WBGene00017475	F14H12.8	Transmembrane protein: unassigned	25.3617	4.67841	2.4386	0.00018827	0.0258
WBGene00020326	math-38	Stress response: pathogen: unassigned	44.6204	8.19925	2.4441	5.2e-06	0.0013714
WBGene00009877	F49C12.7	Signaling: unassigned	2110.33	381.372	2.4682	5.12e-16	1.11e-12
WBGene00020617	T20D4.11	Unassigned: regulated by multiple stresses	174.254	31.3586	2.4743	5.62e-07	0.00020946
WBGene00019593	K09F6.10	Unassigned: regulated by multiple stresses	936.284	159.103	2.557	3.41e-17	9.04e-14
WBGene00022040	Y65B4BR.1	Signaling: lipid: phospholipase B	1109.68	185.05	2.5842	6.32e-10	5.58e-07
WBGene00219267	mir-5548	Non-coding RNA: miRNA	186.403	28.2671	2.7212	6.25e-14	9.94e-11
WBGene00005616	srj-29	Transmembrane protein: seven transmembrane receptor: srj	40.7936	6.1481	2.7301	1.11e-06	0.00036837
WBGene00235093	C54F6.18	Unassigned	35.6042	4.95657	2.8446	0.00027393	0.033843
WBGene00019576	lido-5	Unassigned: regulated by multiple stresses	97.9787	13.5184	2.8575	7.23e-08	3.75e-05
WBGene00020616	T20D4.10	Unassigned: regulated by multiple stresses	84.6649	11.4814	2.8825	3.18e-08	1.85e-05
WBGene00019662	K11H12.6	Unassigned: regulated by multiple stresses	19.3399	2.34636	3.0431	6.49e-05	0.011544
WBGene00189950	C39B5.14	Unassigned	85.1688	10.0512	3.083	7.58e-06	0.0019026
WBGene00022256	Y73B6BL.37	Signaling: lipid: phospholipase B	34.1784	3.84394	3.1524	2.24e-06	0.00070204
WBGene00013900	ugt-18	Stress response: detoxification: ugt	545.153	60.4248	3.1734	7.06e-19	2.4e-15
WBGene00021118	clec-125	Stress response: C-type Lectin	148.215	13.7183	3.4335	1.09e-13	1.62e-10
WBGene00011848	chil-27	Extracellular material: chitinase	13.5553	1.15483	3.5531	0.00015436	0.021908
WBGene00044284	spp-21	Unassigned	41.5153	3.20056	3.6972	6.34e-06	0.0016256
WBGene00018225	nep-14	Pseudogene	88.4956	6.79423	3.7032	4.47e-09	3.11e-06
WBGene00004997	spp-12	Stress response: pathogen: saposin	158.765	11.6725	3.7657	0.00026844	0.033337
WBGene00017678	asp-12	Proteolysis general: aspartate: cathepsin	3674.86	265.46	3.7911	9.32e-06	0.0022393
WBGene00044315	F41G3.20	Unassigned	11.3067	0.769887	3.8764	0.00036373	0.042307
WBGene00015878	C17B7.4	Unassigned	51.4155	3.00671	4.0959	8.83e-12	9.15e-09
WBGene00007829	oac-5	Metabolism: lipid: o-acyl transferase	42.4825	2.45039	4.1158	1.84e-10	1.69e-07
WBGene00021581	clec-70	Stress response: C-type Lectin	76.0629	3.75687	4.3396	1.17e-08	7.45e-06
WBGene00044242	C54C8.12	Unassigned	13.5684	0.595763	4.5094	5.71e-05	0.010729
WBGene00005064	sra-38	Transmembrane protein: seven transmembrane receptor: sra	46.9471	1.92197	4.6104	1.21e-12	1.51e-09
WBGene00020881	T28A11.19	Unassigned: regulated by multiple stresses	141.417	5.50197	4.6839	4.61e-06	0.001257
WBGene00008295	nlp-39	Neuronal function: synaptic function: neuropeptide	148.006	5.48499	4.754	1.19e-24	9.44e-21
WBGene00011521	T06C12.14	Unassigned	264.168	6.90706	5.2572	5.23e-06	0.0013714
WBGene00219308	W06G6.20	Unassigned	12.9306	0.297881	5.4399	3.18e-05	0.0066534
WBGene00007729	clec-185	Stress response: C-type Lectin	1512.34	17.8234	6.4069	1.68e-13	2.36e-10
WBGene00045238	rpr-1	Non-coding RNA: ncRNA	1108.59	10.3852	6.7381	8.99e-21	4.29e-17
WBGene00009423	F35E8.10	Unassigned: regulated by multiple stresses	100.508	0.893644	6.8134	3.41e-05	0.007076
WBGene00005065	sra-39	Transmembrane protein: seven transmembrane receptor: sra	137.389	0.960984	7.1595	2.79e-19	1.11e-15
WBGene00197317	T22F3.14	Non-coding RNA: ncRNA	11.3423	0	Inf	1.86e-05	0.0041493
WBGene00018911	F56A4.3	Stress response: detoxification: GST	0	254.655	#NAME?	1.79e-21	1.07e-17
WBGene00022292	Y75D11A.3	Unassigned: regulated by multiple stresses	0	247.3	#NAME?	6.52e-39	7.77e-35
WBGene00002102	ins-19	Metabolism: insulin	0.320786	60.4337	-7.5576	0.0094252	0.44947
WBGene00044896	K12C11.5	Unassigned	0.674057	21.1789	-4.9736	0.0011524	0.10177
WBGene00195032	Y37E3.24	Non-coding RNA: ncRNA	0.388942	10.2253	-4.7164	0.00048618	0.052218
WBGene00019508	K07H8.8	Extracellular material: chondroitin sulfotransferase	0.388942	6.62278	-4.0898	0.045408	1
WBGene00009866	F49C5.3	Unassigned	0.388942	6.58066	-4.0806	0.0092035	0.44243
WBGene00199251	F46F2.10	Non-coding RNA: ncRNA	0.320786	4.52401	-3.8179	0.047418	1
WBGene00013351	Y59A8B.19	Unassigned	0.337028	4.74575	-3.8157	0.043977	1
WBGene00017399	lgc-51	Transmembrane transport: extracellular ligand gated channel	0.388942	5.29115	-3.766	0.022613	0.75396
WBGene00006223	str-179	Pseudogene	0.320786	4.12484	-3.6847	0.087223	1
WBGene00009362	F33E2.6	Unassigned	0.320786	3.9031	-3.6049	0.092772	1
WBGene00005415	srh-204	Transmembrane protein: seven transmembrane receptor: srh	0.388942	4.71786	-3.6005	0.043652	1
WBGene00014043	clec-58	Stress response: C-type Lectin	0.709727	8.54215	-3.5893	0.13052	1
WBGene00019910	NA	NA	0.388942	4.57438	-3.5559	0.053714	1
WBGene00196914	R07E4.9	Non-coding RNA: ncRNA	0.388942	4.54648	-3.5471	0.054156	1
WBGene00001528	gcy-1	Signaling: heteromeric G protein: guanylyl cyclase	0.388942	4.39483	-3.4982	0.078547	1
WBGene00007163	fbxa-154	Proteolysis proteasome: E3: F box	0.641571	7.13698	-3.4756	0.014421	0.59286
WBGene00045393	F26D11.13	Unassigned: regulated by multiple stresses	0.657814	7.19889	-3.452	0.016437	0.63523
WBGene00012022	clec-39	Stress response: C-type Lectin	0.337028	3.66981	-3.4448	0.098844	1
WBGene00198419	F17E5.4	Non-coding RNA: ncRNA	0.320786	3.35496	-3.3866	0.15085	1
WBGene00197482	C07A12.11	Non-coding RNA: ncRNA	0.388942	3.92008	-3.3333	0.16049	1
WBGene00045006	R05A10.10	Pseudogene	0.320786	3.20056	-3.3186	0.15717	1
WBGene00015637	srxa-5	Transmembrane protein: seven transmembrane receptor: srxa	0.337028	3.28487	-3.2849	0.12994	1
WBGene00000697	col-123	Extracellular material: collagen	0.320786	3.12167	-3.2826	0.1606	1
WBGene00015020	B0205.5	Unassigned	0.320786	3.11624	-3.2801	0.19042	1
WBGene00008698	F11D11.3	Stress response: pathogen: unassigned	1.41945	13.5129	-3.2509	0.00056424	0.058494
WBGene00044587	srz-105	Transmembrane protein: seven transmembrane receptor: srz	0.388942	3.65009	-3.2303	0.0979	1
WBGene00010801	M01B2.8	Unassigned	0.641571	5.89508	-3.1998	0.03164	0.89282
WBGene00206395	C08H9.18	Unassigned	0.320786	2.94754	-3.1998	0.16873	1
WBGene00012394	hsd-1	Metabolism: lipid: sterol	0.709727	6.51332	-3.1981	0.02264	0.75396
WBGene00044027	F27E5.8	Transmembrane protein: seven transmembrane receptor: unassigned	0.388942	3.50386	-3.1713	0.10232	1
WBGene00008905	F17B5.1	Unassigned: regulated by multiple stresses	9.57891	84.9776	-3.1491	0.0035235	0.2283
WBGene00196295	F45H7.9	Non-coding RNA: ncRNA	0.320786	2.81836	-3.1352	0.24364	1
WBGene00011219	srxa-10	Development: general	0.388942	3.39165	-3.1244	0.12408	1
WBGene00044244	F26D10.13	Unassigned	0.388942	3.3801	-3.1194	0.13875	1
WBGene00045283	K08E4.8	Unassigned	0.320786	2.78159	-3.1162	0.45027	1
WBGene00044673	C07D10.6	Unassigned	0.337028	2.86323	-3.0867	0.20208	1
WBGene00219916	F26D10.23	Non-coding RNA: ncRNA	0.337028	2.86048	-3.0853	0.17227	1
WBGene00006077	str-9	Transmembrane protein: seven transmembrane receptor: str	0.337028	2.84076	-3.0753	0.17328	1
WBGene00022674	ZK177.9	Unassigned: regulated by multiple stresses	0.337028	2.81561	-3.0625	0.20461	1
WBGene00020545	adbp-2	Pseudogene	0.337028	2.79864	-3.0538	0.24383	1
WBGene00018166	nspb-5	Unassigned	0.337028	2.79589	-3.0524	0.20568	1
WBGene00044560	C36C9.6	Transmembrane protein: unassigned	0.641571	5.31362	-3.05	0.057477	1
WBGene00013390	Y62H9A.2	Unassigned	0.320786	2.65241	-3.0476	0.25321	1
WBGene00200176	T19A5.11	Non-coding RNA: ncRNA	0.320786	2.65241	-3.0476	0.25321	1
WBGene00016743	srb-15	Transmembrane protein: seven transmembrane receptor: srb	0.320786	2.62451	-3.0324	0.25491	1
WBGene00018917	irld-35	Unassigned: receptor L domain	0.72597	5.91756	-3.027	0.035666	0.93756
WBGene00017200	F07C4.6	Unassigned: regulated by multiple stresses	1.68514	13.6782	-3.0209	0.001474	0.12161
WBGene00197775	F26F12.11	Non-coding RNA: ncRNA	0.337028	2.7313	-3.0186	0.24762	1
WBGene00019376	lipl-4	Metabolism: lipid: lipase	0.72597	5.86994	-3.0154	0.036107	0.94194
WBGene00020305	T07D3.2	Unassigned	0.320786	2.56535	-2.9995	0.2586	1
WBGene00219957	F48F5.7	Non-coding RNA: snoRNA	0.388942	3.07405	-2.9825	0.15969	1
WBGene00021566	Y45G12C.3	Stress response: detoxification: GST	0.388942	3.05975	-2.9758	0.42293	1
WBGene00009622	F41E7.6	Metabolism: lipid: unassigned	0.641571	4.99877	-2.9619	0.084317	1
WBGene00199473	F45E6.7	Non-coding RNA: ncRNA	0.337028	2.60754	-2.9517	0.44864	1
WBGene00011294	R102.7	Pseudogene	0.388942	3.00671	-2.9506	0.16271	1
WBGene00013800	Y116A8C.23	Transmembrane protein: unassigned	0.320786	2.45856	-2.9381	0.26558	1
WBGene00016255	C30E1.6	Pseudogene	0.641571	4.88381	-2.9283	0.086527	1
WBGene00017287	F09E5.9	Pseudogene	2.95204	22.4201	-2.925	0.0056561	0.32342
WBGene00195247	F41D3.15	Pseudogene	0.709727	5.31362	-2.9044	0.056517	1
WBGene00086556	F36D1.12	Unassigned	3.14027	23.4962	-2.9035	0.0053811	0.31525
WBGene00003261	mir-2	Non-coding RNA: miRNA	0.320786	2.39397	-2.8997	0.31953	1
WBGene00197147	C09D8.7	Non-coding RNA: ncRNA	0.962357	7.18192	-2.8997	0.093911	1
WBGene00006102	str-37	Transmembrane protein: seven transmembrane receptor: str	0.337028	2.49801	-2.8898	0.26189	1
WBGene00219600	linc-118	Non-coding RNA: linc	0.320786	2.3715	-2.8861	0.2716	1
WBGene00219771	linc-24	Non-coding RNA: linc	1.03051	7.58384	-2.8796	0.025495	0.80624
WBGene00202011	R13H4.13	Non-coding RNA: ncRNA	0.388942	2.86048	-2.8786	0.16966	1
WBGene00007179	B0457.4	Unassigned	0.337028	2.45039	-2.8621	0.26504	1
WBGene00005666	sru-3	Transmembrane protein: seven transmembrane receptor: sru	0.320786	2.32663	-2.8586	0.32428	1
WBGene00200359	F18E2.13	Non-coding RNA: ncRNA	0.320786	2.32388	-2.8569	0.27503	1
WBGene00020364	T08E11.8	Pseudogene	1.03051	7.43211	-2.8504	0.019766	0.70798
WBGene00014068	nhr-255	Transcription factor: NHR	0.320786	2.30416	-2.8446	0.27648	1
WBGene00005265	srh-42	Transmembrane protein: seven transmembrane receptor: srh	0.320786	2.28719	-2.8339	0.32714	1
WBGene00014707	C47A10.t4	Pseudogene	0.320786	2.28719	-2.8339	0.32714	1
WBGene00019340	K02F6.6	Unassigned	0.320786	2.28719	-2.8339	0.32714	1
WBGene00015272	C01B4.8	Transmembrane transport: major facilitator	3.58112	25.3662	-2.8244	0.26547	1
WBGene00008679	F11A5.13	Transmembrane protein: unassigned	0.337028	2.34636	-2.7995	0.32172	1
WBGene00219657	linc-139	Non-coding RNA: linc	0.320786	2.2226	-2.7926	0.47902	1
WBGene00010058	F54E4.2	Transmembrane protein: seven transmembrane receptor: unassigned	13.2133	91.4808	-2.7915	0.00086326	0.08223
WBGene00013824	Y116F11B.8	Unassigned: regulated by multiple stresses	0.320786	2.21985	-2.7908	0.33219	1
WBGene00197296	C09B7.6	Non-coding RNA: ncRNA	0.320786	2.20013	-2.7779	0.33371	1
WBGene00020459	fbxa-23	Pseudogene	1.31563	9.02288	-2.7778	0.014549	0.59505
WBGene00200931	W07G4.11	Non-coding RNA: ncRNA	0.320786	2.1804	-2.7649	0.33524	1
WBGene00009764	srz-17	Pseudogene	0.337028	2.23957	-2.7323	0.32947	1
WBGene00015986	C18G1.8	Protein modification: carbohydrate	1.36754	9.02013	-2.7216	0.029582	0.86125
WBGene00202303	W07G1.22	Non-coding RNA: ncRNA	0.337028	2.2226	-2.7213	0.47684	1
WBGene00198855	F59G1.12	Non-coding RNA: ncRNA	0.388942	2.5626	-2.72	0.21608	1
WBGene00011053	arrd-12	Signaling: heteromeric G protein: arrestin	0.320786	2.11306	-2.7197	0.34063	1
WBGene00016092	cyp-33B1	Stress response: detoxification: CYP	0.962357	6.33377	-2.7184	0.052527	1
WBGene00007199	B0513.7	Pseudogene	0.337028	2.20013	-2.7066	0.33246	1
WBGene00016256	NA	NA	0.388942	2.53745	-2.7058	0.25607	1
WBGene00017215	F07F6.1	Unassigned: regulated by multiple stresses	0.777883	5.06061	-2.7017	0.059183	1
WBGene00006146	str-87	Transmembrane protein: seven transmembrane receptor: str	0.337028	2.1804	-2.6937	0.33398	1
WBGene00013636	Y105C5A.12	Unassigned: regulated by multiple stresses	0.337028	2.1804	-2.6937	0.33398	1
WBGene00006104	str-39	Transmembrane protein: seven transmembrane receptor: str	0.337028	2.17223	-2.6882	0.3773	1
WBGene00021428	Y38F2AR.10	Unassigned	1.01109	6.51607	-2.6881	0.050074	1
WBGene00021990	Y59E1B.1	Non-coding RNA: ncRNA	0.320786	2.06545	-2.6868	0.41338	1
WBGene00011483	T05E11.7	Pseudogene	0.657814	4.22613	-2.6836	0.11679	1
WBGene00185116	W09C2.8	Unassigned	0.320786	2.0539	-2.6787	0.36431	1
WBGene00007559	C14A4.8	Unassigned: regulated by multiple stresses	1.01109	6.4514	-2.6737	0.05563	1
WBGene00020333	sre-12	Transmembrane protein: seven transmembrane receptor: sre	0.388942	2.47829	-2.6717	0.2598	1
WBGene00021227	mct-1	Transmembrane transport: monocarboxylate	7.166	45.555	-2.6684	0.20451	1
WBGene00012415	Y7A5A.9	Unassigned	0.388942	2.47011	-2.667	0.35496	1
WBGene00012817	Y43F8B.6	Pseudogene	0.337028	2.13554	-2.6637	0.40162	1
WBGene00008911	F17C8.6	Transmembrane transport: calcium channel	0.388942	2.45856	-2.6602	0.26107	1
WBGene00196102	C29H12.7	Non-coding RNA: ncRNA	0.657814	4.14732	-2.6564	0.47168	1
WBGene00235332	K04A8.20	Unassigned	0.337028	2.11581	-2.6503	0.40313	1
WBGene00006162	str-111	Transmembrane protein: seven transmembrane receptor: str	0.337028	2.11306	-2.6484	0.33931	1
WBGene00018441	math-29	Pseudogene	0.337028	2.11306	-2.6484	0.33931	1
WBGene00174757	21ur-10341	NA	0.337028	2.11306	-2.6484	0.33931	1
WBGene00008889	F16D3.6	Transmembrane protein: unassigned	0.709727	4.4397	-2.6451	0.10996	1
WBGene00005860	srw-113	Transmembrane protein: seven transmembrane receptor: srw	0.320786	2.00628	-2.6448	0.34964	1
WBGene00019201	NA	NA	0.337028	2.09334	-2.6349	0.34091	1
WBGene00005302	srh-81	Pseudogene	0.320786	1.98931	-2.6326	0.41453	1
WBGene00044004	C24A8.6	Signaling: heteromeric G protein: receptor	5.83968	35.9859	-2.6235	0.15052	1
WBGene00021289	Y25C1A.2	Unassigned	1.063	6.53304	-2.6196	0.042627	1
WBGene00206390	F14F7.7	Unassigned	0.320786	1.96141	-2.6122	0.41688	1
WBGene00198214	C17E4.17	Non-coding RNA: ncRNA	0.337028	2.04847	-2.6036	0.40838	1
WBGene00010820	M01G12.6	Transmembrane protein: seven transmembrane receptor: unassigned	0.320786	1.94169	-2.5976	0.41856	1
WBGene00020979	fbxb-55	Proteolysis proteasome: E3: F box	0.337028	2.026	-2.5877	0.34653	1
WBGene00010360	fbxa-96	Proteolysis proteasome: E3: F box	0.320786	1.92197	-2.5829	0.42027	1
WBGene00011158	chil-16	Extracellular material: chitinase	0.320786	1.92197	-2.5829	0.42027	1
WBGene00020753	T24A6.16	Extracellular material: chondroitin sulfotransferase	0.388942	2.32388	-2.5789	0.27016	1
WBGene00219822	C17H12.36	Non-coding RNA: snoRNA	0.388942	2.30966	-2.5701	0.57478	1
WBGene00023345	T12B5.9	Pseudogene	2.51494	14.8758	-2.5644	0.0035875	0.23119
WBGene00219837	C28D4.17	Non-coding RNA: snoRNA	0.337028	1.98931	-2.5613	0.41318	1
WBGene00013754	fbxa-116	Proteolysis proteasome: E3: F box	0.9786	5.76315	-2.5581	0.068133	1
WBGene00015837	math-8	Unassigned: membrane spanning domain	0.320786	1.87435	-2.5467	0.42447	1
WBGene00017941	F31A9.2	Non-coding RNA: linc	2.32671	13.5157	-2.5383	0.0062354	0.34455
WBGene00015374	C03B1.3	Unassigned	0.337028	1.94711	-2.5304	0.52048	1
WBGene00020961	sknr-1	Transcription factor: bZIP	0.72597	4.17851	-2.525	0.11624	1
WBGene00006216	str-172	Transmembrane protein: seven transmembrane receptor: str	1.04676	6.02434	-2.5249	0.063655	1
WBGene00219691	linc-106	Non-coding RNA: linc	0.320786	1.83491	-2.516	0.42805	1
WBGene00012024	clec-29	Stress response: C-type Lectin	0.337028	1.92472	-2.5137	0.63358	1
WBGene00044589	C29F5.8	Unassigned	0.337028	1.92472	-2.5137	0.63358	1
WBGene00021630	Y47D9A.3	Unassigned: regulated by multiple stresses	0.320786	1.81518	-2.5004	0.42988	1
WBGene00003539	nas-20	Proteolysis general: metallopeptidase	52.3582	295.404	-2.4962	0.00078347	0.075762
WBGene00000660	col-85	Extracellular material: collagen	1.04676	5.89516	-2.4936	0.12915	1
WBGene00199323	C08D8.5	Non-coding RNA: ncRNA	0.709727	3.99559	-2.4931	0.14136	1
WBGene00017619	F20A1.8	Unassigned	1.04676	5.89241	-2.4929	0.075733	1
WBGene00017723	bgnt-1.2	Protein modification: carbohydrate	1.94471	10.8858	-2.4848	0.077067	1
WBGene00022604	dmsr-10	Transmembrane protein: seven transmembrane receptor: dmsr	0.320786	1.79546	-2.4847	0.43173	1
WBGene00077574	T08G5.16	Pseudogene	0.320786	1.79546	-2.4847	0.43173	1
WBGene00219608	linc-58	Non-coding RNA: linc	0.657814	3.67531	-2.4821	0.41611	1
WBGene00006007	srx-116	Transmembrane protein: seven transmembrane receptor: srx	0.388942	2.17223	-2.4816	0.37092	1
WBGene00047552	21ur-2099	NA	0.320786	1.78729	-2.4781	0.56659	1
WBGene00047835	21ur-199	NA	0.320786	1.78729	-2.4781	0.56659	1
WBGene00202101	Y39A3CR.10	Non-coding RNA: ncRNA	0.320786	1.78729	-2.4781	0.56659	1
WBGene00044040	F54D5.16	Pseudogene	0.337028	1.87435	-2.4754	0.42302	1
WBGene00015911	C17F4.3	Unassigned	2.31047	12.7736	-2.4669	0.0062417	0.34455
WBGene00018254	F40H6.2	Extracellular material: galectin	0.388942	2.13554	-2.457	0.39776	1
WBGene00044807	T19H5.6	Extracellular material: chitinase	3.62928	19.8888	-2.4542	0.0009392	0.0873
WBGene00195405	F59C6.17	Non-coding RNA: ncRNA	1.41945	7.77218	-2.453	0.031998	0.89973
WBGene00196127	K02E11.14	Non-coding RNA: ncRNA	0.709727	3.88338	-2.452	0.16893	1
WBGene00005387	srh-171	Transmembrane protein: seven transmembrane receptor: srh	1.16683	6.36442	-2.4474	0.058165	1
WBGene00017902	F28E10.4	Unassigned: regulated by multiple stresses	0.337028	1.83766	-2.4469	0.51727	1
WBGene00005589	sri-77	Transmembrane protein: seven transmembrane receptor: sri	0.320786	1.74784	-2.4459	0.43629	1
WBGene00196047	C02C6.4	Non-coding RNA: ncRNA	0.320786	1.73087	-2.4318	0.51987	1
WBGene00172271	21ur-7600	NA	0.994842	5.36666	-2.4315	0.13271	1
WBGene00005827	srw-80	Pseudogene	0.320786	1.72812	-2.4295	0.43822	1
WBGene00018583	NA	NA	0.337028	1.81518	-2.4292	0.42837	1
WBGene00013175	Y53F4B.36	Unassigned: regulated by multiple stresses	0.657814	3.52633	-2.4224	0.21405	1
WBGene00023423	F43C1.7	Unassigned	1.31563	7.04174	-2.4202	0.049517	1
WBGene00019556	K09C6.2	Signaling: unassigned	1.03051	5.49049	-2.4136	0.1114	1
WBGene00206536	C14A6.16	Pseudogene	0.657814	3.49844	-2.411	0.21521	1
WBGene00014188	ZK1025.8	Extracellular material: chondroitin sulfotransferase	19.1903	101.58	-2.4042	0.27088	1
WBGene00219718	linc-42	Non-coding RNA: linc	2.0416	10.7674	-2.3989	0.028677	0.84931
WBGene00013007	Y48E1B.8	Transmembrane protein: unassigned	54.0152	284.734	-2.3982	0.05775	1
WBGene00005574	sri-62	Transmembrane protein: seven transmembrane receptor: sri	0.337028	1.77574	-2.3975	0.43205	1
WBGene00014651	B0399.t8	Pseudogene	0.9786	5.10005	-2.3817	0.10356	1
WBGene00173188	21ur-7501	NA	0.320786	1.66895	-2.3793	0.56084	1
WBGene00196282	F46G11.10	Non-coding RNA: ncRNA	0.320786	1.66895	-2.3793	0.56084	1
WBGene00009751	F46A8.8	Extracellular material: galectin	0.337028	1.75059	-2.3769	0.51676	1
WBGene00005204	srg-47	Transmembrane protein: seven transmembrane receptor: srg	0.320786	1.66353	-2.3746	0.5259	1
WBGene00011387	T02G6.4	Transmembrane protein: unassigned	0.337028	1.74784	-2.3746	0.43472	1
WBGene00012400	Y6E2A.7	Unassigned	0.9786	5.05243	-2.3682	0.13161	1
WBGene00008827	F14H3.8	Pseudogene	0.657814	3.39165	-2.3662	0.21977	1
WBGene00020642	T20H9.6	Pseudogene	1.33187	6.8479	-2.3622	0.051235	1
WBGene00010804	M01E5.1	Pseudogene	0.337028	1.72812	-2.3583	0.43663	1
WBGene00195022	F39E9.15	Non-coding RNA: ncRNA	0.337028	1.72812	-2.3583	0.43663	1
WBGene00197989	R07D5.5	Non-coding RNA: ncRNA	0.641571	3.28487	-2.3562	0.22528	1
WBGene00219891	F12F6.20	Non-coding RNA: ncRNA	0.388942	1.98931	-2.3546	0.40896	1
WBGene00219443	Y57G11C.1144	Unassigned	1.063	5.4204	-2.3503	0.095754	1
WBGene00006194	str-147	Pseudogene	0.641571	3.26789	-2.3487	0.26335	1
WBGene00006927	vit-3	Metabolism: lipid: binding	7056.12	35869	-2.3458	0.014847	0.60516
WBGene00015447	srab-2	Transmembrane protein: seven transmembrane receptor: srab	0.337028	1.71115	-2.344	0.52018	1
WBGene00020794	T25D1.2	Unassigned	0.962357	4.88106	-2.3426	0.17028	1
WBGene00010946	M176.10	Unassigned	0.388942	1.96684	-2.3383	0.3836	1
WBGene00009898	dod-23	Unassigned: regulated by multiple stresses	886.167	4473.8	-2.3359	0.093908	1
WBGene00005297	srh-76	Transmembrane protein: seven transmembrane receptor: srh	0.388942	1.96141	-2.3343	0.41122	1
WBGene00015252	B0546.5	Transmembrane protein: unassigned	1.31563	6.62553	-2.3323	0.061369	1
WBGene00018066	F35F11.3	Pseudogene	0.337028	1.68868	-2.325	0.44053	1
WBGene00044264	Y105E8A.32	Unassigned	0.388942	1.94711	-2.3237	0.51145	1
WBGene00012820	Y43F8B.10	Transmembrane protein: unassigned	0.320786	1.60436	-2.3223	0.53143	1
WBGene00017497	irld-32	Unassigned: receptor L domain	0.9786	4.88381	-2.3192	0.1438	1
WBGene00220133	Y14H12A.4	Non-coding RNA: ncRNA	1.55577	7.75513	-2.3175	0.13595	1
WBGene00022013	Y60C6A.1	Transmembrane protein: unassigned	5.295	26.2558	-2.3099	0.0044038	0.26924
WBGene00007204	best-2	Transmembrane transport: chloride channel	0.337028	1.66895	-2.308	0.55785	1
WBGene00010753	K10G4.4	Pseudogene	2.58628	12.7151	-2.2976	0.027858	0.83764
WBGene00008790	F14D7.3	Unassigned	0.674057	3.31276	-2.2971	0.22254	1
WBGene00018623	F48G7.12	Unassigned	0.320786	1.57647	-2.297	0.53411	1
WBGene00044162	F49C5.10	Unassigned	0.320786	1.57647	-2.297	0.53411	1
WBGene00077629	K10G4.13	Pseudogene	0.320786	1.57647	-2.297	0.53411	1
WBGene00006928	vit-4	Metabolism: lipid: binding	11334.5	55642.6	-2.2955	0.0076451	0.39287
WBGene00006154	str-97	Transmembrane protein: seven transmembrane receptor: str	2.07727	10.175	-2.2923	0.018769	0.68757
WBGene00011937	ilc-17.1	Extracellular material: secreted protein	0.9786	4.76273	-2.283	0.12732	1
WBGene00194762	NA	NA	1.45194	7.02477	-2.2745	0.055673	1
WBGene00198037	K03H4.4	Non-coding RNA: ncRNA	0.337028	1.62409	-2.2687	0.52805	1
WBGene00005556	sri-44	Pseudogene	0.320786	1.53977	-2.263	0.70903	1
WBGene00008029	scl-7	Extracellular material: secreted protein	0.320786	1.53977	-2.263	0.70903	1
WBGene00077523	C23H5.12	Transmembrane protein: unassigned	0.320786	1.53702	-2.2605	0.53799	1
WBGene00020526	T15B7.14	Transmembrane protein: unassigned	0.709727	3.39982	-2.2601	0.21718	1
WBGene00019107	irld-10	Pseudogene	0.709727	3.39165	-2.2567	0.21753	1
WBGene00021404	trpl-3	Unassigned	0.657814	3.14139	-2.2557	0.26865	1
WBGene00022671	ZK177.3	Nucleic acid: binding: zinc finger	0.657814	3.14139	-2.2557	0.26865	1
WBGene00021988	rgs-8.2	Signaling: heteromeric G protein: unassigned	6.9421	33.003	-2.2492	0.31876	1
WBGene00002115	ins-32	Metabolism: insulin	0.641571	3.03735	-2.2431	0.32092	1
WBGene00008524	F02D10.3	Unassigned	0.320786	1.5173	-2.2418	0.53997	1
WBGene00015224	B0507.7	Unassigned	0.674057	3.17808	-2.2372	0.22876	1
WBGene00019091	srab-13	Transmembrane protein: seven transmembrane receptor: srab	0.9786	4.61382	-2.2372	0.17442	1
WBGene00235312	F28A12.10	Unassigned	3.00396	14.1399	-2.2348	0.032994	0.91104
WBGene00021181	srz-27	Pseudogene	0.657814	3.09377	-2.2336	0.27102	1
WBGene00009467	F36D1.8	Extracellular material: chondroitin sulfotransferase	0.709727	3.33249	-2.2313	0.22009	1
WBGene00013749	Y113G7A.12	Unassigned	1.01109	4.73483	-2.2274	0.12721	1
WBGene00011565	nhr-272	Transcription factor: NHR	0.72597	3.39708	-2.2263	0.24348	1
WBGene00220047	R74.11	Non-coding RNA: ncRNA	0.337028	1.57647	-2.2258	0.53254	1
WBGene00219688	linc-21	Non-coding RNA: linc	11.8995	55.5767	-2.2236	0.0006567	0.065183
WBGene00008867	NA	NA	0.320786	1.49758	-2.223	0.54198	1
WBGene00020775	T24E12.6	Unassigned	0.641571	2.99516	-2.223	0.33101	1
WBGene00006155	str-99	Transmembrane protein: seven transmembrane receptor: str	0.388942	1.81518	-2.2225	0.42367	1
WBGene00009867	F49C5.4	Signaling: S/T kinase	2.98771	13.8755	-2.2154	0.077119	1
WBGene00005143	srd-66	Transmembrane protein: seven transmembrane receptor: srd	0.320786	1.48941	-2.2151	0.61743	1
WBGene00005304	srh-83	Transmembrane protein: seven transmembrane receptor: srh	0.320786	1.48941	-2.2151	0.61743	1
WBGene00023429	W08G11.6	Non-coding RNA: snoRNA	0.641571	2.97276	-2.2121	0.55552	1
WBGene00007250	nspb-8	Unassigned	1.9572	8.9997	-2.2011	0.31653	1
WBGene00235335	R02D5.24	Unassigned	0.320786	1.46968	-2.1958	0.54487	1
WBGene00220157	Y41E3.464	Non-coding RNA: snoRNA	0.388942	1.77574	-2.1908	0.42723	1
WBGene00200167	F45D3.11	Non-coding RNA: ncRNA	0.641571	2.91965	-2.1861	0.30534	1
WBGene00220203	Y73B6A.14	Non-coding RNA: snoRNA	1.09867	4.97087	-2.1777	0.13884	1
WBGene00007512	C10C6.3	Unassigned: regulated by multiple stresses	0.320786	1.44996	-2.1763	0.54694	1
WBGene00077752	Y105C5A.508	Unassigned	0.641571	2.89992	-2.1763	0.28207	1
WBGene00009756	F46B3.1	Unassigned	0.657814	2.97001	-2.1747	0.32358	1
WBGene00007156	B0379.2	Unassigned: membrane spanning domain	0.337028	1.5173	-2.1706	0.53834	1
WBGene00018709	srsx-8	Transmembrane protein: seven transmembrane receptor: srsx	0.709727	3.18626	-2.1665	0.29368	1
WBGene00017743	F23F1.2	Unassigned	1.68514	7.56404	-2.1663	0.15388	1
WBGene00045367	F17C11.15	Non-coding RNA: snoRNA	0.320786	1.43299	-2.1593	0.65481	1
WBGene00016334	C33C12.1	Unassigned	2.06103	9.20242	-2.1587	0.032535	0.90734
WBGene00198409	Y48A6C.7	Non-coding RNA: ncRNA	0.320786	1.43024	-2.1566	0.54905	1
WBGene00007164	fbxa-139	Proteolysis proteasome: E3: F box	0.709727	3.16111	-2.1551	0.26518	1
WBGene00008249	srsx-28	Transmembrane protein: seven transmembrane receptor: srsx	0.72597	3.22845	-2.1529	0.26126	1
WBGene00010005	cnc-7	Stress response: pathogen: caenacin	1.063	4.72336	-2.1517	0.38741	1
WBGene00011322	irld-14	Transmembrane protein: unassigned	0.388942	1.72812	-2.1516	0.43165	1
WBGene00016280	C31B8.2	Pseudogene	0.388942	1.72812	-2.1516	0.43165	1
WBGene00168519	21ur-13262	NA	0.777883	3.43927	-2.1445	0.2127	1
WBGene00050381	21ur-1921	NA	0.337028	1.48941	-2.1438	0.61466	1
WBGene00077546	C01A2.9	Unassigned: membrane spanning domain	0.337028	1.48941	-2.1438	0.61466	1
WBGene00008327	srz-44	Transmembrane protein: seven transmembrane receptor: srz	0.962357	4.24585	-2.1414	0.18603	1
WBGene00005977	srx-86	Transmembrane protein: seven transmembrane receptor: srx	1.29939	5.72646	-2.1398	0.12427	1
WBGene00169426	21ur-15109	NA	0.388942	1.71115	-2.1373	0.5157	1
WBGene00196015	Y67D8A.6	Non-coding RNA: ncRNA	0.388942	1.71115	-2.1373	0.5157	1
WBGene00008251	srsx-30	Transmembrane protein: seven transmembrane receptor: srsx	0.777883	3.41955	-2.1362	0.21351	1
WBGene00014888	Y43F8B.8	Pseudogene	4.62413	20.2764	-2.1326	0.0021962	0.16416
WBGene00021728	Y49F6C.6	Unassigned	0.72597	3.17808	-2.1302	0.22632	1
WBGene00000029	abu-6	Unassigned	3.60986	15.7939	-2.1294	0.069396	1
WBGene00006953	wrt-7	Signaling: hedgehog-like	0.674057	2.93937	-2.1246	0.38562	1
WBGene00201960	C05E11.17	Non-coding RNA: ncRNA	0.337028	1.46968	-2.1246	0.54318	1
WBGene00005937	srx-46	Transmembrane protein: seven transmembrane receptor: srx	0.709727	3.09377	-2.124	0.26844	1
WBGene00009149	F26D2.10	Transmembrane protein: unassigned	0.388942	1.68868	-2.1183	0.43542	1
WBGene00005076	srb-11	Transmembrane protein: seven transmembrane receptor: srb	0.320786	1.39079	-2.1162	0.61144	1
WBGene00195413	D1022.11	Non-coding RNA: ncRNA	0.320786	1.39079	-2.1162	0.61144	1
WBGene00198593	K08A8.16	Non-coding RNA: ncRNA	0.320786	1.39079	-2.1162	0.61144	1
WBGene00007872	C32H11.9	Stress response: pathogen: CUB	52.0649	224.978	-2.1114	0.10067	1
WBGene00008943	srz-36	Pseudogene	0.777883	3.33249	-2.099	0.21714	1
WBGene00014084	snb-7	Trafficking: vesicle targeting/fusion: SNARE	0.777883	3.32706	-2.0966	0.25453	1
WBGene00009513	sfxn-1.2	Transmembrane transport: ion	0.9786	4.18401	-2.0961	0.28716	1
WBGene00019379	K04A8.10	Pseudogene	1.3513	5.76315	-2.0925	0.10679	1
WBGene00020123	R160.6	Transmembrane protein: unassigned	0.320786	1.36565	-2.0899	0.6607	1
WBGene00010228	clec-161	Stress response: C-type Lectin	0.337028	1.43299	-2.0881	0.65343	1
WBGene00021949	clec-164	Stress response: C-type Lectin	0.337028	1.43299	-2.0881	0.65343	1
WBGene00196872	F40F9.15	Non-coding RNA: ncRNA	0.337028	1.43299	-2.0881	0.65343	1
WBGene00011950	T23F6.2	Unassigned: regulated by multiple stresses	2.32671	9.87433	-2.0854	0.067571	1
WBGene00005218	srg-61	Transmembrane protein: seven transmembrane receptor: srg	0.388942	1.64381	-2.0794	0.52154	1
WBGene00005566	sri-54	Transmembrane protein: seven transmembrane receptor: sri	0.388942	1.64381	-2.0794	0.52154	1
WBGene00220127	W10D5.5	Non-coding RNA: ncRNA	0.388942	1.64381	-2.0794	0.52154	1
WBGene00019812	R01H2.4	Unassigned: regulated by multiple stresses	1.33187	5.62847	-2.0793	0.15386	1
WBGene00194982	Y17D7B.10	Unassigned	6.51692	27.5197	-2.0782	0.00078482	0.075762
WBGene00050890	F17C11.16	Pseudogene	1.09867	4.62805	-2.0746	0.15054	1
WBGene00009752	F46A8.9	Pseudogene	0.320786	1.34593	-2.0689	0.66248	1
WBGene00021385	Y37F4.4	Unassigned	0.320786	1.34593	-2.0689	0.66248	1
WBGene00198556	K01A12.7	Non-coding RNA: ncRNA	0.320786	1.34593	-2.0689	0.66248	1
WBGene00005883	srw-136	Transmembrane protein: seven transmembrane receptor: srw	0.337028	1.41052	-2.0653	0.54942	1
WBGene00015854	C16C8.17	Unassigned	0.337028	1.41052	-2.0653	0.54942	1
WBGene00021300	Y27F2A.9	Unassigned	0.337028	1.41052	-2.0653	0.54942	1
WBGene00184956	F49C5.12	Unassigned	0.674057	2.82103	-2.0653	0.36337	1
WBGene00012502	clec-107	Stress response: C-type Lectin	0.388942	1.62409	-2.062	0.5233	1
WBGene00022670	ZK177.2	Unassigned: membrane spanning domain	0.388942	1.62409	-2.062	0.5233	1
WBGene00022940	C23H5.10	Non-coding RNA: ncRNA	0.388942	1.62409	-2.062	0.5233	1
WBGene00235287	Y55F3C.17	Pseudogene	4.82859	20.1549	-2.0615	0.023382	0.77005
WBGene00010857	M04C9.2	Proteolysis general: unassigned	0.674057	2.79589	-2.0524	0.33217	1
WBGene00009378	F34H10.1	Unassigned	0.709727	2.93937	-2.0502	0.36253	1
WBGene00050913	T12B5.14	Transmembrane protein: unassigned	9.56724	39.5548	-2.0477	0.0055257	0.32016
WBGene00202498	Y60C6A.2	Unassigned	0.320786	1.3262	-2.0476	0.66429	1
WBGene00219845	C32F10.9	Non-coding RNA: snoRNA	0.641571	2.65241	-2.0476	0.39946	1
WBGene00005976	srx-85	Transmembrane protein: seven transmembrane receptor: srx	0.962357	3.97587	-2.0466	0.22428	1
WBGene00021873	clec-82	Stress response: C-type Lectin	2.27799	9.40444	-2.0456	0.047703	1
WBGene00007805	clec-231	Stress response: C-type Lectin	0.337028	1.39079	-2.045	0.60856	1
WBGene00168375	21ur-11860	NA	0.388942	1.60436	-2.0444	0.52508	1
WBGene00015406	C03H5.4	Signaling: lipid: phospholipase A	1.04676	4.31319	-2.0428	0.18127	1
WBGene00018918	F56A4.10	Transmembrane transport: major facilitator	1.63641	6.73569	-2.0413	0.15975	1
WBGene00009597	F40G12.2	Unassigned	1.01109	4.12209	-2.0275	0.21741	1
WBGene00022780	ZK622.1	Signaling: Y kinase	1.09867	4.47914	-2.0275	0.17484	1
WBGene00016818	C50E3.7	Transmembrane protein: unassigned	0.709727	2.88295	-2.0222	0.32544	1
WBGene00013747	spe-19	Transmembrane protein: unassigned	0.641571	2.60479	-2.0215	0.40228	1
WBGene00077561	W05H12.3	Pseudogene	0.641571	2.60479	-2.0215	0.40228	1
WBGene00014773	F56D5.8	Pseudogene	0.388942	1.57647	-2.0191	0.52765	1
WBGene00044171	Y54E2A.13	Pseudogene	0.337028	1.36565	-2.0186	0.65926	1
WBGene00044805	Y53C10A.15	Transcription factor: unassigned	0.337028	1.36565	-2.0186	0.65926	1
WBGene00022344	pals-40	Unassigned: ALS2cr12 domain	1.36754	5.48774	-2.0046	0.14661	1
WBGene00021809	Y53G8AR.1	Unassigned	0.388942	1.55675	-2.0009	0.52949	1
WBGene00202099	C02E7.17	Non-coding RNA: ncRNA	0.337028	1.34593	-1.9977	0.66101	1
WBGene00005317	srh-98	Transmembrane protein: seven transmembrane receptor: srh	1.4357	5.69581	-1.9882	0.10648	1
WBGene00001735	grl-26	Signaling: hedgehog-like	1.03051	4.07173	-1.9823	0.22505	1
WBGene00011876	srz-6	Transmembrane protein: seven transmembrane receptor: srz	0.674057	2.65241	-1.9764	0.39756	1
WBGene00044897	M01D7.9	mRNA functions: binding: RBM	0.337028	1.3262	-1.9764	0.6628	1
WBGene00016153	idpb-2	Unassigned	3.88248	15.2404	-1.9728	0.033123	0.91132
WBGene00005270	srh-47	Transmembrane protein: seven transmembrane receptor: srh	0.320786	1.25887	-1.9724	0.67066	1
WBGene00006285	str-259	Pseudogene	0.320786	1.25887	-1.9724	0.67066	1
WBGene00195728	T28D9.13	Non-coding RNA: ncRNA	0.320786	1.25887	-1.9724	0.67066	1
WBGene00201901	T09B4.19	Non-coding RNA: ncRNA	0.320786	1.25887	-1.9724	0.67066	1
WBGene00021491	comt-4	Protein modification: methyltransferase	6.19295	24.236	-1.9685	0.0028737	0.20213
WBGene00195718	W06B11.5	Non-coding RNA: ncRNA	1.01109	3.95347	-1.9672	0.43259	1
WBGene00017553	nep-8	Proteolysis general: metallopeptidase	1.40003	5.46802	-1.9656	0.14634	1
WBGene00005359	srh-142	Transmembrane protein: seven transmembrane receptor: srh	0.388942	1.5173	-1.9639	0.53324	1
WBGene00009589	F40F11.4	Unassigned	0.9786	3.79632	-1.9558	0.26547	1
WBGene00015855	C16C8.18	Cytoskeleton: microtubule: RMDN	1.16683	4.52401	-1.955	0.14817	1
WBGene00009956	F53B2.5	Unassigned: regulated by multiple stresses	1.04676	4.05475	-1.9537	0.21849	1
WBGene00014889	Y43F8C.t1	Pseudogene	0.320786	1.23914	-1.9497	0.67258	1
WBGene00008631	F10A3.1	Cytoskeleton: claudin	1.40003	5.38638	-1.9439	0.1291	1
WBGene00197167	F48C1.13	Non-coding RNA: ncRNA	0.674057	2.58507	-1.9393	0.40152	1
WBGene00050880	F32H2.12	Unassigned	0.388942	1.48941	-1.9371	0.60633	1
WBGene00197597	M163.17	Non-coding RNA: ncRNA	0.388942	1.48941	-1.9371	0.60633	1
WBGene00019874	R05C11.2	Unassigned	2.48245	9.46361	-1.9306	0.046013	1
WBGene00008359	nspc-17	Unassigned	56.5304	215.365	-1.9297	0.0042988	0.26557
WBGene00044207	Y6G8.5	Unassigned	2.05784	7.82585	-1.9271	0.17146	1
WBGene00007648	folr-1	Transmembrane protein: unassigned	0.320786	1.21942	-1.9265	0.67454	1
WBGene00199051	R03E9.7	Non-coding RNA: ncRNA	0.337028	1.27859	-1.9236	0.66722	1
WBGene00201309	K10D6.22	Non-coding RNA: ncRNA	0.337028	1.27859	-1.9236	0.66722	1
WBGene00219690	linc-10	Non-coding RNA: linc	4.1676	15.8029	-1.9229	0.014528	0.59505
WBGene00011703	srab-19	Pseudogene	0.777883	2.94754	-1.9219	0.27234	1
WBGene00009757	F46B3.2	Pseudogene	0.388942	1.46968	-1.9179	0.53791	1
WBGene00013607	clec-27	Stress response: C-type Lectin	2.02536	7.64843	-1.917	0.089022	1
WBGene00003761	nlp-23	Neuronal function: synaptic function: neuropeptide	0.962357	3.63037	-1.9155	0.27284	1
WBGene00005519	sri-7	Transmembrane protein: seven transmembrane receptor: sri	0.674057	2.53745	-1.9124	0.40438	1
WBGene00044059	T27C5.12	Extracellular material: chondroitin sulfotransferase	2.27799	8.53932	-1.9064	0.068651	1
WBGene00016016	C23G10.10	Transmembrane protein: unassigned	0.337028	1.25887	-1.9012	0.66909	1
WBGene00050971	F11D11.15	Pseudogene	0.388942	1.45271	-1.9011	0.64753	1
WBGene00200476	C48D5.9	Non-coding RNA: ncRNA	0.388942	1.45271	-1.9011	0.64753	1
WBGene00000525	clc-4	Cytoskeleton: claudin	0.641571	2.39397	-1.8997	0.48593	1
WBGene00005631	srj-52	Transmembrane protein: seven transmembrane receptor: srj	1.03051	3.84394	-1.8992	0.26164	1
WBGene00198656	Y37D8A.27	Non-coding RNA: ncRNA	1.28314	4.7852	-1.8989	0.21622	1
WBGene00010823	M01G12.10	Unassigned	0.388942	1.44996	-1.8984	0.53989	1
WBGene00011584	clec-15	Stress response: C-type Lectin	0.709727	2.64424	-1.8975	0.39598	1
WBGene00012627	Y38H6C.15	Transmembrane protein: unassigned	1.74024	6.47112	-1.8947	0.093931	1
WBGene00006198	str-151	Transmembrane protein: seven transmembrane receptor: str	0.9786	3.63579	-1.8935	0.47151	1
WBGene00198103	C56E10.5	Non-coding RNA: ncRNA	0.320786	1.19153	-1.8931	0.69163	1
WBGene00200749	F38A3.5	Non-coding RNA: ncRNA	0.320786	1.19153	-1.8931	0.69163	1
WBGene00009263	F30A10.4	Protein modification: carbohydrate	1.31563	4.87493	-1.8896	0.33842	1
WBGene00044738	folt-3	Transmembrane transport: solute carrier	2.66693	9.87095	-1.888	0.044498	1
WBGene00023270	F17E9.14	Pseudogene	0.641571	2.37425	-1.8878	0.48713	1
WBGene00021109	W09C3.1	Cytoskeleton: microtubule: tau tubulin kinase	2.60252	9.62618	-1.8871	0.16256	1
WBGene00044659	fbxa-142	Proteolysis proteasome: E3: F box	0.9786	3.61064	-1.8835	0.27298	1
WBGene00013090	Y51B9A.8	Stress response: heavy metal	1.11491	4.10512	-1.8805	0.24927	1
WBGene00200154	F37B12.11	Non-coding RNA: ncRNA	0.388942	1.43024	-1.8786	0.5419	1
WBGene00006231	str-190	Transmembrane protein: seven transmembrane receptor: str	0.337028	1.23914	-1.8784	0.671	1
WBGene00006665	twk-10	Transmembrane transport: potassium channel	3.56169	13.0633	-1.8749	0.017678	0.66484
WBGene00199738	C11G10.11	Non-coding RNA: ncRNA	0.674057	2.47011	-1.8736	0.49355	1
WBGene00200754	F45D3.12	Non-coding RNA: ncRNA	0.777883	2.84351	-1.87	0.32391	1
WBGene00044478	K06B9.6	Unassigned	5.26251	19.2278	-1.8694	0.010102	0.47603
WBGene00021578	Y46B2A.3	Transmembrane protein: unassigned	0.320786	1.1718	-1.869	0.67939	1
WBGene00023396	Y94H6A.t1	Pseudogene	0.320786	1.1718	-1.869	0.67939	1
WBGene00048990	21ur-509	NA	0.320786	1.1718	-1.869	0.67939	1
WBGene00170986	21ur-6990	NA	0.320786	1.1718	-1.869	0.67939	1
WBGene00194917	Y45F10B.59	Unassigned	0.320786	1.1718	-1.869	0.67939	1
WBGene00005246	srh-21	Transmembrane protein: seven transmembrane receptor: srh	0.994842	3.63312	-1.8687	0.31368	1
WBGene00019150	H04J21.1	Unassigned: membrane spanning domain	5.16562	18.8265	-1.8657	0.0061047	0.34331
WBGene00006925	vit-1	Metabolism: lipid: binding	9831.48	35680.9	-1.8597	0.048187	1
WBGene00021183	Y9C9A.16	Metabolism: unassigned	3.3085	11.9984	-1.8586	0.060417	1
WBGene00197437	K09E2.6	Non-coding RNA: ncRNA	0.388942	1.41052	-1.8586	0.54393	1
WBGene00172856	21ur-7506	NA	0.337028	1.21942	-1.8553	0.67293	1
WBGene00005303	srh-82	Transmembrane protein: seven transmembrane receptor: srh	0.657814	2.3715	-1.85	0.41593	1
WBGene00023484	Y54G2A.37	Stress response: C-type Lectin	0.9786	3.52633	-1.8494	0.31886	1
WBGene00016730	C46H11.6	Unassigned	1.67208	6.02434	-1.8492	0.1497	1
WBGene00005097	srd-19	Transmembrane protein: seven transmembrane receptor: srd	0.320786	1.15483	-1.848	0.82521	1
WBGene00014805	K08H10.5	Pseudogene	0.320786	1.15483	-1.848	0.82521	1
WBGene00015341	C02E7.8	Unassigned	0.320786	1.15483	-1.848	0.82521	1
WBGene00015491	C05E4.12	Unassigned	0.320786	1.15483	-1.848	0.82521	1
WBGene00016834	sre-50	Transmembrane protein: unassigned	0.320786	1.15483	-1.848	0.82521	1
WBGene00017213	F07E5.8	Transmembrane protein: unassigned	0.320786	1.15483	-1.848	0.82521	1
WBGene00022871	ZK1240.6	Proteolysis proteasome: E3: RING finger	0.320786	1.15483	-1.848	0.82521	1
WBGene00173216	21ur-14408	NA	0.320786	1.15483	-1.848	0.82521	1
WBGene00197429	W03G11.11	Non-coding RNA: ncRNA	0.320786	1.15483	-1.848	0.82521	1
WBGene00011165	R09D1.9	Pseudogene	1.75648	6.31947	-1.8471	0.10916	1
WBGene00010958	ndfl-4	Metabolism: mitochondria: complex I	19.1616	68.8774	-1.8458	0.40759	1
WBGene00007676	srz-57	Pseudogene	0.320786	1.15208	-1.8446	0.68145	1
WBGene00007832	srbc-82	Transmembrane protein: seven transmembrane receptor: srbc	0.320786	1.15208	-1.8446	0.68145	1
WBGene00013823	Y116F11B.7	Unassigned: regulated by multiple stresses	0.641571	2.30416	-1.8446	0.42157	1
WBGene00022102	Y69F12A.1	Cytoskeleton: microtubule: tau tubulin kinase	1.68833	6.06378	-1.8446	0.14861	1
WBGene00219377	F47C12.12	Pseudogene	0.9786	3.50661	-1.8413	0.31971	1
WBGene00016450	clec-5	Stress response: C-type Lectin	55.9968	200.385	-1.8394	0.0010006	0.090713
WBGene00022552	ZC196.9	Transmembrane protein: unassigned	0.388942	1.39079	-1.8383	0.59999	1
WBGene00006219	str-175	Transmembrane protein: seven transmembrane receptor: str	0.657814	2.35178	-1.838	0.41724	1
WBGene00007960	C35D6.3	NA	2.21358	7.87622	-1.8311	0.064996	1
WBGene00008757	F13E9.8	Unassigned	1.62017	5.76315	-1.8307	0.15609	1
WBGene00013368	Y60A9.1	Unassigned	0.674057	2.39397	-1.8285	0.48396	1
WBGene00013909	srbc-44	Transmembrane protein: seven transmembrane receptor: srbc	0.709727	2.52048	-1.8284	0.47456	1
WBGene00005169	srg-11	Transmembrane protein: seven transmembrane receptor: srg	1.063	3.77385	-1.8279	0.22804	1
WBGene00014182	ZK1025.2	Extracellular material: chondroitin sulfotransferase	3.67801	13.0458	-1.8266	0.26731	1
WBGene00009873	F49C12.3	Unassigned	0.337028	1.19153	-1.8219	0.68923	1
WBGene00050958	F28B1.10	Pseudogene	0.337028	1.19153	-1.8219	0.68923	1
WBGene00173053	21ur-12272	NA	0.337028	1.19153	-1.8219	0.68923	1
WBGene00196985	F35G2.12	Non-coding RNA: ncRNA	0.337028	1.19153	-1.8219	0.68923	1
WBGene00017551	F18A12.2	Unassigned: membrane spanning domain	0.320786	1.13236	-1.8196	0.68354	1
WBGene00201521	K02A4.12	Non-coding RNA: ncRNA	0.320786	1.13236	-1.8196	0.68354	1
WBGene00219882	F08B6.7	Non-coding RNA: ncRNA	0.9786	3.45082	-1.8181	0.41346	1
WBGene00012283	W05H5.1	Transmembrane protein: seven transmembrane receptor: unassigned	0.388942	1.36565	-1.812	0.65474	1
WBGene00016736	NA	NA	0.657814	2.30691	-1.8102	0.49031	1
WBGene00219708	linc-13	Non-coding RNA: linc	1.98968	6.97715	-1.8101	0.12595	1
WBGene00006180	str-131	Transmembrane protein: seven transmembrane receptor: str	0.72597	2.54288	-1.8085	0.34513	1
WBGene00044228	T03F6.7	Pseudogene	0.72597	2.54288	-1.8085	0.34513	1
WBGene00168823	21ur-8307	NA	0.641571	2.24499	-1.807	0.50643	1
WBGene00018039	F35D2.1	Unassigned: regulated by multiple stresses	7.87753	27.5392	-1.8057	0.04443	1
WBGene00001896	his-22	Transcription: chromatin structure: histone	0.337028	1.1718	-1.7978	0.67771	1
WBGene00009464	F36D1.5	Unassigned	0.337028	1.1718	-1.7978	0.67771	1
WBGene00021091	W08F4.1	Unassigned	0.337028	1.1718	-1.7978	0.67771	1
WBGene00196854	CD4.13	Non-coding RNA: ncRNA	0.657814	2.28719	-1.7978	0.49156	1
WBGene00009345	F32H2.8	Transmembrane protein: unassigned	1.98968	6.91249	-1.7967	0.18259	1
WBGene00012818	Y43F8B.7	Unassigned	3.00077	10.4246	-1.7966	0.057367	1
WBGene00194691	ZK1098.12	Transmembrane protein: unassigned	0.72597	2.52048	-1.7957	0.47365	1
WBGene00007369	C06B8.3	Metabolism: lipid: sterol	0.320786	1.11264	-1.7943	0.68591	1
WBGene00007895	C33D3.4	Unassigned	0.320786	1.11264	-1.7943	0.68591	1
WBGene00023518	srz-76	Pseudogene	0.709727	2.45856	-1.7925	0.40704	1
WBGene00021382	Y37F4.1	Unassigned	9.92549	34.3791	-1.7923	0.0013412	0.11377
WBGene00197715	B0024.17	Non-coding RNA: ncRNA	0.388942	1.34593	-1.791	0.65644	1
WBGene00011416	T04A11.1	Metabolism: unassigned	8.10779	28.0213	-1.7891	0.43643	1
WBGene00001734	grl-25	Signaling: hedgehog-like	1.50385	5.18711	-1.7863	0.15023	1
WBGene00021266	Y22D7AR.14	Unassigned: membrane spanning domain	1.38378	4.76273	-1.7832	0.18667	1
WBGene00011426	T04C10.3	Unassigned	0.657814	2.25929	-1.7801	0.49334	1
WBGene00173836	21ur-11773	NA	0.337028	1.15483	-1.7767	0.82379	1
WBGene00174315	21ur-10686	NA	0.337028	1.15483	-1.7767	0.82379	1
WBGene00196942	C15C8.10	Non-coding RNA: ncRNA	0.674057	2.30966	-1.7767	0.71205	1
WBGene00197952	C18D1.14	Non-coding RNA: ncRNA	0.337028	1.15483	-1.7767	0.82379	1
WBGene00018873	F55C12.6	Unassigned: Glycosyltransferase family A	4.13511	14.159	-1.7757	0.02186	0.7446
WBGene00014653	B0399.t10	Pseudogene	1.34811	4.61107	-1.7742	0.21943	1
WBGene00014794	K02E2.5	Pseudogene	0.337028	1.15208	-1.7733	0.67975	1
WBGene00019702	fbxb-39	Proteolysis proteasome: E3: F box	0.337028	1.15208	-1.7733	0.67975	1
WBGene00048900	21ur-5295	NA	0.337028	1.15208	-1.7733	0.67975	1
WBGene00009683	F44D12.6	Transmembrane protein: unassigned	1.48761	5.08033	-1.7719	0.15305	1
WBGene00020900	T28F2.1	Protein modification: carbohydrate	0.657814	2.24499	-1.771	0.4816	1
WBGene00020845	T27A10.5	Unassigned	0.388942	1.3262	-1.7697	0.65816	1
WBGene00018545	nhr-189	Transcription factor: NHR	0.9786	3.33249	-1.7678	0.32748	1
WBGene00015030	B0207.7	Cytoskeleton: microtubule: tau tubulin kinase	0.709727	2.41095	-1.7643	0.41002	1
WBGene00015465	C05C8.8	Unassigned: Glycosyltransferase family A	2.83891	9.62956	-1.7621	0.063931	1
WBGene00003332	mir-239.1	Non-coding RNA: miRNA	1.01109	3.41412	-1.7556	0.37344	1
WBGene00011013	srxa-8	Transmembrane protein: seven transmembrane receptor: srxa	0.72597	2.45039	-1.755	0.40654	1
WBGene00016553	mir-8199	Non-coding RNA: miRNA	32.9602	111.085	-1.7529	0.0014085	0.11784
WBGene00005070	srb-5	Transmembrane protein: seven transmembrane receptor: srb	0.709727	2.39122	-1.7524	0.41128	1
WBGene00199937	T04C9.10	Non-coding RNA: ncRNA	0.337028	1.13236	-1.7484	0.68181	1
WBGene00013811	Y116A8C.38	Signaling: Y kinase	2.34614	7.84777	-1.742	0.41474	1
WBGene00022213	Y73B3A.11	Unassigned	1.29939	4.33834	-1.7393	0.28419	1
WBGene00044663	F26G1.10	Unassigned	5.14938	17.1575	-1.7364	0.013646	0.57872
WBGene00005722	srv-11	Transmembrane protein: seven transmembrane receptor: srv	0.320786	1.06777	-1.7349	0.82676	1
WBGene00201587	ZK867.20	Non-coding RNA: ncRNA	0.320786	1.06777	-1.7349	0.82676	1
WBGene00202313	BE10.7	Non-coding RNA: ncRNA	0.320786	1.06777	-1.7349	0.82676	1
WBGene00018412	nhr-37	Transcription factor: NHR	1.28314	4.26557	-1.7331	0.26521	1
WBGene00007873	dod-21	Stress response: unassigned	98.4475	327.156	-1.7326	0.11968	1
WBGene00007734	C25G4.7	Unassigned: regulated by multiple stresses	0.9786	3.24817	-1.7308	0.38232	1
WBGene00198081	C09D8.8	Non-coding RNA: ncRNA	0.9786	3.24817	-1.7308	0.38232	1
WBGene00023314	H31G24.2	Pseudogene	1.48761	4.92868	-1.7282	0.17954	1
WBGene00013939	ZK218.5	Unassigned	0.337028	1.11264	-1.723	0.68391	1
WBGene00015439	C04E12.10	Pseudogene	0.337028	1.11264	-1.723	0.68391	1
WBGene00171568	21ur-9650	NA	0.337028	1.11264	-1.723	0.68391	1
WBGene00201966	C37H5.16	Non-coding RNA: ncRNA	0.337028	1.11264	-1.723	0.68391	1
WBGene00050940	C25D7.16	Unassigned: regulated by multiple stresses	0.72597	2.39397	-1.7214	0.48088	1
WBGene00219756	linc-68	Non-coding RNA: linc	2.4987	8.22996	-1.7197	0.20956	1
WBGene00174467	21ur-10359	NA	0.674057	2.21985	-1.7195	0.49484	1
WBGene00044163	F49C5.11	Unassigned: regulated by multiple stresses	5.95281	19.5956	-1.7189	0.2921	1
WBGene00199225	ZK1321.5	Non-coding RNA: ncRNA	0.388942	1.27859	-1.7169	0.66241	1
WBGene00012597	nhr-235	Unassigned	0.709727	2.33206	-1.7163	0.45207	1
WBGene00011114	R07E5.6	Unassigned: regulated by multiple stresses	0.72597	2.37425	-1.7095	0.48204	1
WBGene00017496	srbc-15	Pseudogene	0.320786	1.04805	-1.708	0.82813	1
WBGene00219709	linc-37	Non-coding RNA: linc	3.49354	11.4087	-1.7074	0.088991	1
WBGene00014047	clec-61	Stress response: C-type Lectin	3.37347	11.0149	-1.7071	0.046028	1
WBGene00008083	cyp-29A1	Pseudogene	0.674057	2.20013	-1.7066	0.49613	1
WBGene00021972	glb-31	Globin	2.53437	8.26658	-1.7057	0.070228	1
WBGene00016647	fbxc-4	Proteolysis proteasome: E3: F box	1.68833	5.50472	-1.7051	0.18214	1
WBGene00020888	T28C12.1	Transmembrane transport: major facilitator	3.00396	9.78396	-1.7036	0.087492	1
WBGene00014225	ZK1098.9	Transmembrane protein: unassigned	0.709727	2.30966	-1.7023	0.69805	1
WBGene00014161	arrd-5	Signaling: heteromeric G protein: arrestin	3.14027	10.211	-1.7012	0.057851	1
WBGene00020927	W02B3.7	Transmembrane protein: unassigned	1.40003	4.54923	-1.7002	0.33423	1
WBGene00011163	chil-20	Pseudogene	1.34811	4.37778	-1.6993	0.22666	1
WBGene00008474	nhr-174	Transcription factor: NHR	0.657814	2.13554	-1.6988	0.58878	1
WBGene00006256	str-225	Transmembrane protein: seven transmembrane receptor: str	0.388942	1.25887	-1.6945	0.66421	1
WBGene00008899	F16H6.9	Unassigned	0.388942	1.25887	-1.6945	0.66421	1
WBGene00013721	Y106G6H.9	Proteolysis proteasome: E3: F box	1.41945	4.5886	-1.6927	0.19281	1
WBGene00000654	col-78	Extracellular material: collagen	0.641571	2.07362	-1.6925	0.50696	1
WBGene00195255	H16D19.7	Pseudogene	5.33067	17.2079	-1.6907	0.020311	0.71641
WBGene00219849	C36C9.10	Non-coding RNA: ncRNA	7.97261	25.7014	-1.6887	0.5321	1
WBGene00021490	Y40B10A.5	Transmembrane protein: unassigned	2.34296	7.55044	-1.6882	0.12156	1
WBGene00006014	srx-123	Pseudogene	1.31563	4.2343	-1.6864	0.26517	1
WBGene00017906	F28F9.2	Transmembrane protein: unassigned	1.62017	5.20959	-1.685	0.24699	1
WBGene00006598	tor-2	Chaperone: unassigned	2.51812	8.06732	-1.6797	0.079957	1
WBGene00219661	linc-45	Non-coding RNA: linc	5.90465	18.9164	-1.6797	0.016562	0.63899
WBGene00009069	F23A7.4	Unassigned: regulated by multiple stresses	268.9	860.88	-1.6787	0.43385	1
WBGene00077703	K08E5.5	Unassigned	0.674057	2.15251	-1.6751	0.49929	1
WBGene00005095	srd-17	Transmembrane protein: seven transmembrane receptor: srd	0.709727	2.26472	-1.674	0.41961	1
WBGene00021838	Y54E10BL.3	Transmembrane protein: unassigned	2.2455	7.15945	-1.6728	0.16896	1
WBGene00011818	srt-57	Pseudogene	2.39805	7.62603	-1.6691	0.24818	1
WBGene00020357	T08E11.1	Proteolysis proteasome: E3: F box	1.4357	4.56346	-1.6684	0.21824	1
WBGene00000756	col-183	Extracellular material: collagen	0.337028	1.06777	-1.6637	0.82565	1
WBGene00008565	acox-1.2	Metabolism: lipid: beta oxidation	242.102	767.068	-1.6637	0.072869	1
WBGene00200243	Y106G6E.7	Non-coding RNA: ncRNA	0.709727	2.24499	-1.6614	0.4746	1
WBGene00017371	sre-39	Transmembrane protein: seven transmembrane receptor: sre	1.03051	3.25697	-1.6602	0.51654	1
WBGene00000620	col-43	Extracellular material: collagen	13.9518	43.9802	-1.6564	0.0012097	0.10566
WBGene00010119	F55G7.1	Unassigned	3.78184	11.8576	-1.6487	0.056192	1
WBGene00017693	flp-23	Neuronal function: synaptic function: neuropeptide	0.388942	1.21942	-1.6486	0.6679	1
WBGene00017740	NA	NA	0.388942	1.21942	-1.6486	0.6679	1
WBGene00165122	21ur-7774	NA	0.388942	1.21942	-1.6486	0.6679	1
WBGene00167431	21ur-10303	NA	0.388942	1.21942	-1.6486	0.6679	1
WBGene00195631	F46F2.9	Non-coding RNA: ncRNA	0.388942	1.21942	-1.6486	0.6679	1
WBGene00196592	T24D8.11	Non-coding RNA: ncRNA	0.388942	1.21942	-1.6486	0.6679	1
WBGene00014771	F55G11.3	Pseudogene	2.16167	6.76901	-1.6468	0.11153	1
WBGene00007456	srz-29	Transmembrane protein: seven transmembrane receptor: srz	0.777883	2.43342	-1.6454	0.47562	1
WBGene00021447	NA	NA	2.14542	6.70991	-1.645	0.16528	1
WBGene00196202	W04D2.8	Non-coding RNA: ncRNA	1.063	3.32431	-1.6449	0.32402	1
WBGene00201980	K08A8.28	Non-coding RNA: ncRNA	1.04676	3.27064	-1.6436	0.51853	1
WBGene00195629	C05G5.8	Non-coding RNA: ncRNA	0.9786	3.05433	-1.6421	0.3916	1
WBGene00011934	T22H2.4	Unassigned	1.31563	4.10512	-1.6417	0.35421	1
WBGene00219298	F55H2.8	Unassigned	0.657814	2.04847	-1.6388	0.59403	1
WBGene00005522	sri-10	Transmembrane protein: seven transmembrane receptor: sri	0.674057	2.09609	-1.6368	0.59016	1
WBGene00006484	tag-138	Trafficking: endocytosis: clathrin	0.994842	3.09377	-1.6368	0.38887	1
WBGene00049470	21ur-1041	NA	0.337028	1.04805	-1.6368	0.827	1
WBGene00199290	ZK377.9	Non-coding RNA: ncRNA	0.337028	1.04805	-1.6368	0.827	1
WBGene00015449	ugt-63	Stress response: detoxification: ugt	31.0755	96.2704	-1.6313	0.0015003	0.12251
WBGene00021023	W04B5.6	Transmembrane protein: unassigned	2.71566	8.40464	-1.6299	0.094966	1
WBGene00010391	oac-37	Metabolism: lipid: o-acyl transferase	1.6689	5.16464	-1.6298	0.24245	1
WBGene00009760	F46B3.7	Unassigned	1.68514	5.20409	-1.6268	0.28848	1
WBGene00012596	nhr-234	Transcription factor: NHR	0.641571	1.96684	-1.6162	0.54522	1
WBGene00019392	irld-44	Unassigned: receptor L domain	1.63641	5.01574	-1.6159	0.25187	1
WBGene00023334	R148.t4	Pseudogene	0.388942	1.19153	-1.6152	0.68223	1
WBGene00045098	VY10G11R.3	Pseudogene	0.388942	1.19153	-1.6152	0.68223	1
WBGene00023455	mir-358	Non-coding RNA: miRNA	0.72597	2.2226	-1.6143	0.61635	1
WBGene00005268	srh-45	Transmembrane protein: seven transmembrane receptor: srh	0.320786	0.980706	-1.6122	0.83297	1
WBGene00015772	C14E2.3	Unassigned	0.320786	0.980706	-1.6122	0.83297	1
WBGene00021433	Y39A3A.2	Unassigned	0.320786	0.980706	-1.6122	0.83297	1
WBGene00007208	B0564.9	Unassigned	0.657814	2.00903	-1.6107	0.59649	1
WBGene00007407	C07B5.2	Unassigned	0.657814	2.00903	-1.6107	0.59649	1
WBGene00044093	srbc-72	Pseudogene	1.31563	4.01806	-1.6107	0.35734	1
WBGene00008597	clec-55	Stress response: C-type Lectin	11.1509	34.0171	-1.6091	0.027631	0.83592
WBGene00007874	C32H11.11	Unassigned	0.657814	2.00628	-1.6088	0.51062	1
WBGene00008468	E03G2.1	Pseudogene	0.657814	2.00628	-1.6088	0.51062	1
WBGene00010112	nhr-191	Pseudogene	0.777883	2.3715	-1.6082	0.40821	1
WBGene00007246	nspb-10	Unassigned	6.08912	18.5558	-1.6076	0.21387	1
WBGene00005071	srb-6	Transmembrane protein: seven transmembrane receptor: srb	0.709727	2.16068	-1.6061	0.49638	1
WBGene00201141	Y76B12C.10	Non-coding RNA: ncRNA	1.01109	3.07405	-1.6042	0.38904	1
WBGene00019374	K04A8.2	Pseudogene	4.01504	12.2036	-1.6038	0.14635	1
WBGene00012169	ttbk-4	Cytoskeleton: microtubule: tau tubulin kinase	1.4357	4.36081	-1.6028	0.25699	1
WBGene00219905	F19F10.13	Non-coding RNA: ncRNA	1.72081	5.21508	-1.5996	0.57	1
WBGene00194697	F59A3.13	Transmembrane protein: unassigned	1.36754	4.12209	-1.5918	0.30593	1
WBGene00220217	Y95B8A.18	Non-coding RNA: snoRNA	0.388942	1.1718	-1.5911	0.6725	1
WBGene00016227	nhr-280	Unassigned	1.9572	5.89508	-1.5907	0.18487	1
WBGene00167867	21ur-14218	NA	0.674057	2.02875	-1.5897	0.59425	1
WBGene00022497	Y119D3B.21	Unassigned: regulated by multiple stresses	3820.71	11478.8	-1.5871	0.10776	1
WBGene00018410	F44B9.9	Unassigned: hydrolase	2.02536	6.08076	-1.5861	0.17948	1
WBGene00018141	oac-21	Metabolism: lipid: o-acyl transferase	0.641571	1.92197	-1.5829	0.60314	1
WBGene00198101	F52B5.9	Non-coding RNA: ncRNA	0.320786	0.960984	-1.5829	0.83444	1
WBGene00206516	F53E4.2	Unassigned	0.320786	0.960984	-1.5829	0.83444	1
WBGene00012455	Y17D7C.1	Unassigned	2.32671	6.94038	-1.5767	0.20927	1
WBGene00020637	fbxa-7	Proteolysis proteasome: E3: F box	0.709727	2.11581	-1.5759	0.58688	1
WBGene00008826	fbxa-100	Proteolysis proteasome: E3: F box	3.71368	11.0543	-1.5737	0.061303	1
WBGene00023248	C33E10.9	Pseudogene	0.674057	2.00628	-1.5736	0.50945	1
WBGene00006228	str-185	Transmembrane protein: seven transmembrane receptor: str	0.388942	1.15483	-1.5701	0.81963	1
WBGene00008243	C50H2.7	Unassigned	0.388942	1.15483	-1.5701	0.81963	1
WBGene00020129	R193.3	Pseudogene	0.388942	1.15483	-1.5701	0.81963	1
WBGene00021126	NA	NA	0.388942	1.15483	-1.5701	0.81963	1
WBGene00195591	R53.9	Non-coding RNA: ncRNA	0.388942	1.15483	-1.5701	0.81963	1
WBGene00220240	ZK270.4	Non-coding RNA: ncRNA	0.388942	1.15483	-1.5701	0.81963	1
WBGene00006172	str-121	Transmembrane protein: seven transmembrane receptor: str	0.9786	2.89992	-1.5672	0.39947	1
WBGene00044937	ZK546.18	Non-coding RNA: snoRNA	0.388942	1.15208	-1.5666	0.67446	1
WBGene00194675	Y60A9A.3	Pseudogene	2.22982	6.60313	-1.5662	0.16567	1
WBGene00017550	nep-6	Proteolysis general: metallopeptidase	1.01109	2.97001	-1.5546	0.45537	1
WBGene00044449	fipr-20	Stress response: pathogen: NLP-like	1.01109	2.97001	-1.5546	0.45537	1
WBGene00013825	Y116F11B.9	Unassigned: Glycosyltransferase family A	2.37863	6.98257	-1.5536	0.15033	1
WBGene00005675	sru-12	Transmembrane protein: seven transmembrane receptor: sru	0.320786	0.941261	-1.553	0.83594	1
WBGene00003841	ocr-4	Transmembrane transport: TRP channel	8.13709	23.811	-1.549	0.0099079	0.46781
WBGene00021137	W10G11.4	Unassigned	1.78897	5.23473	-1.549	0.21186	1
WBGene00021794	Y52E8A.1	Unassigned	1.65266	4.83014	-1.5473	0.60152	1
WBGene00022551	ZC196.8	Transmembrane protein: unassigned	0.674057	1.96684	-1.5449	0.54335	1
WBGene00014652	B0399.t9	Pseudogene	1.72081	5.01849	-1.5442	0.28475	1
WBGene00016008	C23F12.3	Unassigned	3.00077	8.74197	-1.5426	0.20404	1
WBGene00011472	T05C12.9	Transmembrane protein: unassigned	0.777883	2.26472	-1.5417	0.41506	1
WBGene00012799	Y43F4A.4	Metabolism: glycolysis	0.388942	1.13236	-1.5417	0.67644	1
WBGene00166377	21ur-10793	NA	0.388942	1.13236	-1.5417	0.67644	1
WBGene00195338	T02E9.9	Non-coding RNA: ncRNA	0.388942	1.13236	-1.5417	0.67644	1
WBGene00005999	srx-108	Transmembrane protein: seven transmembrane receptor: srx	1.04676	3.04615	-1.5411	0.40782	1
WBGene00012176	W01C9.2	Unassigned: regulated by multiple stresses	78.8691	229.465	-1.5407	0.023835	0.77616
WBGene00009571	F40D4.12	Unassigned	4.76044	13.8332	-1.539	0.044771	1
WBGene00002015	hsp-16.1	Stress response: heat	190.261	549.269	-1.5295	0.29467	1
WBGene00173920	21ur-8696	NA	0.709727	2.04847	-1.5292	0.59087	1
WBGene00016221	C29F9.6	Transcription: chromatin modification: acetyltransferase	6.87019	19.8126	-1.528	0.015372	0.61784
WBGene00009933	F52E10.2	Unassigned	1.09867	3.16386	-1.5259	0.44252	1
WBGene00018404	nhr-39	Transcription factor: NHR	5.78777	16.6318	-1.5229	0.032981	0.91104
WBGene00018997	F57B9.3	Ribosome: EIF	12.5123	35.9501	-1.5226	0.0026494	0.19085
WBGene00010698	K08H10.6	Transmembrane transport: solute carrier	13.2807	38.144	-1.5221	0.015809	0.62061
WBGene00009525	F38A1.13	Unassigned	0.641571	1.83766	-1.5182	0.72095	1
WBGene00020288	srt-73	Transmembrane protein: seven transmembrane receptor: srt	0.657814	1.88252	-1.5169	0.60468	1
WBGene00009502	F37A8.2	Unassigned: regulated by multiple stresses	0.388942	1.11264	-1.5164	0.67846	1
WBGene00015944	C18A3.7	Unassigned: regulated by multiple stresses	0.388942	1.11264	-1.5164	0.67846	1
WBGene00173215	21ur-6126	NA	0.388942	1.11264	-1.5164	0.67846	1
WBGene00219325	F17C11.22	Unassigned	1.31563	3.7623	-1.5159	0.36188	1
WBGene00050967	C25F9.15	Unassigned	2.0416	5.83049	-1.5139	0.20859	1
WBGene00194699	Y43F8B.22	Unassigned	10.2112	29.1558	-1.5136	0.0061448	0.34403
WBGene00010466	K01D12.7	Unassigned: regulated by multiple stresses	0.777883	2.21985	-1.5128	0.48825	1
WBGene00008662	F10G8.2	Cytoskeleton: microtubule: tau tubulin kinase	4.05071	11.5576	-1.5126	0.11347	1
WBGene00016252	NA	NA	0.674057	1.92197	-1.5116	0.60101	1
WBGene00008037	C40C9.4	Unassigned	1.65266	4.70631	-1.5098	0.32154	1
WBGene00020992	W03F8.2	Pseudogene	8.94746	25.4697	-1.5092	0.02348	0.7714
WBGene00018567	prdm-14	Nucleic acid: binding: zinc finger	5.37009	15.2832	-1.5089	0.029772	0.86534
WBGene00194916	F35D2.6	Unassigned	9.71522	27.6467	-1.5088	0.0083675	0.4148
WBGene00013655	lgc-19	Transmembrane transport: extracellular ligand gated channel	2.02536	5.75773	-1.5073	0.23857	1
WBGene00014954	Y102A5C.5	Pseudogene	157.116	446.46	-1.5067	0.00062905	0.062949
WBGene00008487	F01D4.3	Pseudogene	0.9786	2.77892	-1.5057	0.54008	1
WBGene00011113	R07E5.5	Unassigned	11.8287	33.5902	-1.5057	0.0067825	0.36589
WBGene00044754	Y119C1B.12	Transmembrane protein: unassigned	4.49157	12.737	-1.5037	0.11535	1
WBGene00219304	F56D6.16	Pseudogene	79.2218	224.481	-1.5026	0.0020748	0.15656
WBGene00016349	C33E10.8	Proteolysis proteasome: E3: F box	3.58112	10.1016	-1.4961	0.097979	1
WBGene00010100	F55C9.3	Unassigned	10.7396	30.2822	-1.4955	0.0076353	0.39287
WBGene00012760	Y41C4A.17	Unassigned	5.36634	15.1256	-1.495	0.23325	1
WBGene00011133	R08A2.2	Signaling: phosphatase: unassigned	1.16683	3.28487	-1.4932	0.32117	1
WBGene00202441	F35C12.6	Non-coding RNA: ncRNA	1.98968	5.59178	-1.4908	0.24341	1
WBGene00044638	F23A7.8	Unassigned: regulated by multiple stresses	345.301	969.892	-1.49	0.47822	1
WBGene00006113	str-48	Transmembrane protein: seven transmembrane receptor: str	1.31563	3.69496	-1.4898	0.33997	1
WBGene00000628	col-51	Extracellular material: collagen	0.709727	1.98931	-1.4869	0.59448	1
WBGene00015386	C03B8.3	Transmembrane protein: unassigned	4.55972	12.7655	-1.4852	0.051318	1
WBGene00005913	srx-22	Transmembrane protein: seven transmembrane receptor: srx	0.709727	1.98656	-1.4849	0.50831	1
WBGene00012175	W01C9.1	Unassigned: regulated by multiple stresses	22.3827	62.548	-1.4826	0.00046871	0.05057
WBGene00003333	mir-239.2	Non-coding RNA: miRNA	0.337028	0.941261	-1.4817	0.83471	1
WBGene00005029	sra-3	Transmembrane protein: seven transmembrane receptor: sra	0.337028	0.941261	-1.4817	0.83471	1
WBGene00007871	C32H11.8	NA	0.337028	0.941261	-1.4817	0.83471	1
WBGene00008217	C50B6.1	Unassigned	0.337028	0.941261	-1.4817	0.83471	1
WBGene00045129	Y75B12B.12	Non-coding RNA: snoRNA	0.337028	0.941261	-1.4817	0.83471	1
WBGene00166372	21ur-14887	NA	0.337028	0.941261	-1.4817	0.83471	1
WBGene00019099	F59B1.6	Transmembrane protein: seven transmembrane receptor: unassigned	0.657814	1.83491	-1.48	0.6079	1
WBGene00014073	ZK757.1	Transmembrane protein: unassigned	5.30512	14.78	-1.4782	0.047279	1
WBGene00005283	srh-61	Transmembrane protein: seven transmembrane receptor: srh	0.320786	0.893644	-1.4781	0.83967	1
WBGene00010394	srz-59	Transmembrane protein: seven transmembrane receptor: srz	0.320786	0.893644	-1.4781	0.83967	1
WBGene00016476	srab-10	Transmembrane protein: seven transmembrane receptor: srab	0.320786	0.893644	-1.4781	0.83967	1
WBGene00017097	E02C12.12	Unassigned	0.320786	0.893644	-1.4781	0.83967	1
WBGene00018086	NA	NA	0.320786	0.893644	-1.4781	0.83967	1
WBGene00044951	2RSSE.3	Pseudogene	0.320786	0.893644	-1.4781	0.83967	1
WBGene00047901	21ur-5284	NA	0.320786	0.893644	-1.4781	0.83967	1
WBGene00196691	M02D8.10	Non-coding RNA: ncRNA	0.320786	0.893644	-1.4781	0.83967	1
WBGene00044092	srbc-71	Transmembrane protein: seven transmembrane receptor: srbc	1.36754	3.80174	-1.4751	0.31774	1
WBGene00019527	K08D9.6	Unassigned: Glycosyltransferase family A	1.70457	4.73758	-1.4747	0.29333	1
WBGene00010046	F54D1.1	mRNA functions: binding: KH	5.02931	13.9767	-1.4746	0.05165	1
WBGene00012656	Y39A1A.18	Unassigned: regulated by multiple stresses	2.43054	6.74111	-1.4717	0.15351	1
WBGene00013527	Y73F8A.22	Unassigned	2.3299	6.45415	-1.47	0.20289	1
WBGene00019391	irld-11	Unassigned: receptor L domain	5.01307	13.8836	-1.4696	0.063755	1
WBGene00005609	srj-21	Transmembrane protein: seven transmembrane receptor: srj	0.641571	1.77574	-1.4687	0.61315	1
WBGene00005691	sru-28	Transmembrane protein: seven transmembrane receptor: sru	0.641571	1.77574	-1.4687	0.61315	1
WBGene00195060	linc-14	Non-coding RNA: linc	14.2294	39.3752	-1.4684	0.0046856	0.28071
WBGene00018155	F37C12.14	Unassigned	1.45194	4.01531	-1.4675	0.30672	1
WBGene00023465	srz-81	Pseudogene	1.11491	3.07947	-1.4658	0.49623	1
WBGene00007240	C01G10.15	Unassigned	19.1453	52.7692	-1.4627	0.047117	1
WBGene00019208	lips-14	Pseudogene	10.17	27.9555	-1.4588	0.0062242	0.34455
WBGene00018600	F48C1.8	Unassigned	3.69425	10.1519	-1.4584	0.21577	1
WBGene00168931	21ur-6267	NA	0.962357	2.64424	-1.4582	0.54741	1
WBGene00019788	M116.1	Unassigned: regulated by multiple stresses	0.388942	1.06777	-1.457	0.8222	1
WBGene00077556	Y18D10A.27	Pseudogene	0.388942	1.06777	-1.457	0.8222	1
WBGene00199053	T24B8.16	Non-coding RNA: ncRNA	0.388942	1.06777	-1.457	0.8222	1
WBGene00000021	abt-3	Pseudogene	0.72597	1.98656	-1.4523	0.50715	1
WBGene00206507	Y51A2A.16	Unassigned	2.29423	6.27735	-1.4521	0.26315	1
WBGene00016487	C36C9.4	Unassigned	1.063	2.9081	-1.4519	0.40143	1
WBGene00220032	M7.15	Non-coding RNA: snoRNA	1.8928	5.17014	-1.4497	0.24089	1
WBGene00017615	srsx-32	Transmembrane protein: seven transmembrane receptor: srsx	2.126	5.8026	-1.4486	0.20733	1
WBGene00046433	21ur-3008	NA	0.657814	1.79546	-1.4486	0.61062	1
WBGene00012609	Y38F1A.7	Transmembrane protein: unassigned	0.320786	0.873922	-1.4459	0.84125	1
WBGene00016597	clec-179	Stress response: C-type Lectin	0.320786	0.873922	-1.4459	0.84125	1
WBGene00018322	F41H10.12	Unassigned	0.320786	0.873922	-1.4459	0.84125	1
WBGene00019891	R05F9.7	Transmembrane protein: seven transmembrane receptor: unassigned	0.320786	0.873922	-1.4459	0.84125	1
WBGene00021993	nsph-4.2	Unassigned: regulated by multiple stresses	0.320786	0.873922	-1.4459	0.84125	1
WBGene00199858	C40H5.15	Non-coding RNA: ncRNA	1.74024	4.73758	-1.4449	0.29227	1
WBGene00005144	srd-67	Transmembrane protein: seven transmembrane receptor: srd	1.40003	3.80174	-1.4412	0.31649	1
WBGene00206527	T27A8.7	Unassigned	1.063	2.8857	-1.4408	0.56533	1
WBGene00012414	Y7A5A.8	Unassigned	0.962357	2.61022	-1.4395	0.57664	1
WBGene00020741	dlhd-1	Unassigned: hydrolase	16.6373	45.1183	-1.4393	0.066	1
WBGene00220017	K10D2.10	Non-coding RNA: snoRNA	1.36754	3.69228	-1.4329	0.42184	1
WBGene00016480	srab-7	Transmembrane protein: seven transmembrane receptor: srab	0.9786	2.64149	-1.4326	0.49809	1
WBGene00010102	F55C9.5	Unassigned	9.68649	26.1328	-1.4318	0.023545	0.77142
WBGene00015084	B0244.9	Transmembrane protein: unassigned	0.674057	1.81793	-1.4314	0.72326	1
WBGene00014235	ZK1225.1	Unassigned	1.31563	3.54605	-1.4305	0.42961	1
WBGene00013953	ZK262.8	Unassigned	0.388942	1.04805	-1.4301	0.82349	1
WBGene00016681	C45G9.10	Unassigned	0.388942	1.04805	-1.4301	0.82349	1
WBGene00168316	21ur-8460	NA	0.388942	1.04805	-1.4301	0.82349	1
WBGene00220125	W07G1.23	Non-coding RNA: snoRNA	0.388942	1.04805	-1.4301	0.82349	1
WBGene00235372	F15E6.12	Non-coding RNA: ncRNA	0.674057	1.81518	-1.4292	0.60814	1
WBGene00077622	T25E12.14	Unassigned	0.777883	2.09334	-1.4282	0.49632	1
WBGene00206512	Y39A3B.7	Unassigned	1.78897	4.80767	-1.4262	0.33016	1
WBGene00045494	ZK662.6	Unassigned	8.7598	23.5191	-1.4249	0.034566	0.92295
WBGene00013028	efhc-1	Signaling: calcium: EF hand	9.80599	26.3117	-1.424	0.013743	0.581
WBGene00005060	sra-34	Transmembrane protein: seven transmembrane receptor: sra	0.72597	1.94169	-1.4193	0.59644	1
WBGene00018397	F43E2.11	Unassigned	2.37863	6.35617	-1.418	0.24409	1
WBGene00004275	rab-11.2	Signaling: small GTPase: Rab	9.64095	25.7553	-1.4176	0.019907	0.70798
WBGene00019887	R05D8.11	Unassigned	2.77075	7.40154	-1.4175	0.18857	1
WBGene00010966	nduo-3	Metabolism: mitochondria: complex I	211.429	564.715	-1.4174	0.32716	1
WBGene00022691	math-50	Pseudogene	1.16683	3.11349	-1.4159	0.37986	1
WBGene00199603	F13G11.144	Non-coding RNA: ncRNA	0.641571	1.71115	-1.4153	0.72327	1
WBGene00013770	Y113G7B.26	Pseudogene	0.674057	1.79546	-1.4134	0.60949	1
WBGene00005039	sra-13	Transmembrane protein: seven transmembrane receptor: sra	0.320786	0.854199	-1.413	0.84287	1
WBGene00010662	K08E3.2	Unassigned	2.2455	5.97947	-1.413	0.30534	1
WBGene00016484	C36C5.15	Unassigned	0.320786	0.854199	-1.413	0.84287	1
WBGene00017043	NA	NA	0.320786	0.854199	-1.413	0.84287	1
WBGene00195010	Y37E11AL.12	Transmembrane protein: unassigned	0.320786	0.854199	-1.413	0.84287	1
WBGene00195535	B0432.17	Non-coding RNA: ncRNA	0.320786	0.854199	-1.413	0.84287	1
WBGene00198193	C17H12.31	Non-coding RNA: ncRNA	0.320786	0.854199	-1.413	0.84287	1
WBGene00199447	F08B12.10	Non-coding RNA: ncRNA	0.320786	0.854199	-1.413	0.84287	1
WBGene00014454	MTCE.7	mRNA functions: processing: snRNP	794.737	2112.6	-1.4105	0.0077003	0.394
WBGene00012655	Y39A1A.17	Unassigned	0.657814	1.74784	-1.4098	0.61398	1
WBGene00077535	F15H9.7	Pseudogene	0.994842	2.64149	-1.4088	0.4981	1
WBGene00044222	T16G12.10	Unassigned	1.75648	4.66144	-1.4081	0.33542	1
WBGene00000030	abu-7	Unassigned	23.8956	63.381	-1.4073	0.19726	1
WBGene00005388	srh-172	Transmembrane protein: seven transmembrane receptor: srh	0.337028	0.893644	-1.4068	0.83838	1
WBGene00015241	B0524.2	Signaling: lipid: phospholipase patatin	0.337028	0.893644	-1.4068	0.83838	1
WBGene00197363	W02F12.11	Non-coding RNA: ncRNA	0.337028	0.893644	-1.4068	0.83838	1
WBGene00021713	Y49F6A.5	Unassigned	24.5325	65.0063	-1.4059	0.020873	0.72496
WBGene00020372	T09A12.1	Unassigned: regulated by multiple stresses	1.33187	3.51541	-1.4002	0.45955	1
WBGene00001535	gcy-8	Signaling: heteromeric G protein: guanylyl cyclase	26.628	70.2273	-1.3991	0.00099816	0.090713
WBGene00013883	npr-13	Neuronal function: synaptic function: neuropeptide	6.35188	16.7413	-1.3982	0.034121	0.92176
WBGene00007948	C35A5.4	NA	0.674057	1.77574	-1.3975	0.61087	1
WBGene00000613	col-36	Extracellular material: collagen	1.31563	3.46441	-1.3969	0.46429	1
WBGene00220145	Y39A3CR.11	Non-coding RNA: snoRNA	0.777883	2.04847	-1.3969	0.58684	1
WBGene00005524	sri-12	Transmembrane protein: seven transmembrane receptor: sri	1.65266	4.34989	-1.3962	0.32603	1
WBGene00009707	srxa-16	Transmembrane protein: seven transmembrane receptor: srxa	0.657814	1.72812	-1.3935	0.6154	1
WBGene00044810	Y37E3.19	Transmembrane protein: unassigned	0.657814	1.72812	-1.3935	0.6154	1
WBGene00008583	ugt-65	Stress response: detoxification: ugt	126.21	331.508	-1.3932	0.0045447	0.27644
WBGene00015226	B0507.9	Unassigned	5.23378	13.7434	-1.3928	0.051776	1
WBGene00017645	F20D12.7	Transmembrane protein: unassigned	1.01109	2.64966	-1.3899	0.47163	1
WBGene00006176	str-125	Transmembrane protein: seven transmembrane receptor: str	0.72597	1.90225	-1.3897	0.59894	1
WBGene00013837	fbxa-30	Proteolysis proteasome: E3: F box	5.85911	15.3281	-1.3874	0.060192	1
WBGene00023325	K10F12.1	Pseudogene	1.75648	4.5941	-1.3871	0.33746	1
WBGene00009830	cutl-18	Extracellular material: cuticlin	27.6621	72.3316	-1.3867	0.0010257	0.092222
WBGene00012294	nspa-8	Unassigned: regulated by multiple stresses	0.709727	1.85463	-1.3858	0.60309	1
WBGene00077784	F35C8.9	Pseudogene	1.063	2.77617	-1.385	0.46234	1
WBGene00199101	C44E12.5	Non-coding RNA: ncRNA	1.063	2.77617	-1.385	0.46234	1
WBGene00013817	Y116F11A.3	Unassigned	1.03051	2.68911	-1.3838	0.4685	1
WBGene00018920	F56A4.12	Transmembrane transport: major facilitator	6.53373	17.044	-1.3833	0.22173	1
WBGene00018087	F36D4.1	Unassigned: regulated by multiple stresses	1.3513	3.52358	-1.3827	0.3752	1
WBGene00201202	T24D1.6	Non-coding RNA: ncRNA	1.09867	2.86048	-1.3805	0.3953	1
WBGene00008507	F01G10.4	Unassigned	0.320786	0.834477	-1.3793	0.84452	1
WBGene00017963	F31F4.17	Protein modification: carbohydrate	0.320786	0.834477	-1.3793	0.84452	1
WBGene00022143	Y71G12B.3	Transmembrane protein: unassigned	0.320786	0.834477	-1.3793	0.84452	1
WBGene00045234	Y26D4A.17	Unassigned: membrane spanning domain	0.641571	1.66895	-1.3793	0.69742	1
WBGene00174191	21ur-11781	NA	0.320786	0.834477	-1.3793	0.84452	1
WBGene00174270	21ur-6354	NA	0.320786	0.834477	-1.3793	0.84452	1
WBGene00194645	Y105C5A.1269	Transmembrane protein: unassigned	0.320786	0.834477	-1.3793	0.84452	1
WBGene00202480	ZK829.13	Non-coding RNA: ncRNA	0.320786	0.834477	-1.3793	0.84452	1
WBGene00219938	F38B7.16	Non-coding RNA: ncRNA	0.320786	0.834477	-1.3793	0.84452	1
WBGene00219958	F49E7.5	Non-coding RNA: ncRNA	0.641571	1.66895	-1.3793	0.69742	1
WBGene00009603	srt-33	Transmembrane protein: seven transmembrane receptor: srt	0.657814	1.71115	-1.3792	0.72234	1
WBGene00010707	cyp-14A3	Stress response: detoxification: CYP	3.36041	8.73592	-1.3783	0.17605	1
WBGene00195372	C05E11.9	Non-coding RNA: ncRNA	1.31563	3.41955	-1.3781	0.43481	1
WBGene00005094	srd-16	Transmembrane protein: seven transmembrane receptor: srd	0.337028	0.873922	-1.3746	0.83994	1
WBGene00012091	pals-29	Unassigned: ALS2cr12 domain	0.337028	0.873922	-1.3746	0.83994	1
WBGene00015394	C03G6.6	Transmembrane protein: unassigned	0.641571	1.66353	-1.3746	0.72601	1
WBGene00017679	F21F8.5	Unassigned: regulated by multiple stresses	0.337028	0.873922	-1.3746	0.83994	1
WBGene00197347	F11E6.20	Non-coding RNA: ncRNA	0.337028	0.873922	-1.3746	0.83994	1
WBGene00198000	K08B5.6	Non-coding RNA: ncRNA	0.337028	0.873922	-1.3746	0.83994	1
WBGene00200528	R09G11.3	Non-coding RNA: ncRNA	0.337028	0.873922	-1.3746	0.83994	1
WBGene00201729	C16E9.27	Non-coding RNA: ncRNA	0.674057	1.74784	-1.3746	0.61283	1
WBGene00001693	grd-4	Signaling: hedgehog-like	3.29601	8.54482	-1.3743	0.15309	1
WBGene00044382	Y14H12A.2	Unassigned	11.6301	30.1508	-1.3743	0.055448	1
WBGene00201279	C44C10.14	Non-coding RNA: ncRNA	3.56113	9.22757	-1.3736	0.18466	1
WBGene00022978	F02E11.t1	Non-coding RNA: tRNA	0.709727	1.83766	-1.3725	0.7127	1
WBGene00016199	C28H8.8	Unassigned	7.05467	18.2504	-1.3713	0.038368	0.9685
WBGene00011698	cyp-34A1	Stress response: detoxification: CYP	1.65266	4.27375	-1.3707	0.35114	1
WBGene00007358	lact-6	Transmembrane protein: unassigned	2.80324	7.24376	-1.3696	0.19066	1
WBGene00235318	K11D5.2	Non-coding RNA: ncRNA	1.4357	3.70926	-1.3694	0.3644	1
WBGene00022356	eak-3	Unassigned	5.78777	14.8949	-1.3637	0.075794	1
WBGene00008098	C44H9.2	Pseudogene	3.00396	7.72999	-1.3636	0.16862	1
WBGene00013931	clec-97	Stress response: C-type Lectin	102.767	264.39	-1.3633	0.22801	1
WBGene00019174	H09G03.1	Unassigned	19.1299	49.1706	-1.362	0.0029013	0.20287
WBGene00196568	M79.9	Non-coding RNA: ncRNA	0.994842	2.55718	-1.362	0.55015	1
WBGene00045067	F07C6.6	Transmembrane protein: unassigned	30.085	77.2889	-1.3612	0.0022657	0.16777
WBGene00194708	Y36E3A.2	Transmembrane protein: unassigned	13.821	35.4753	-1.36	0.0073681	0.38359
WBGene00007243	nspb-7	Unassigned: regulated by multiple stresses	5.80719	14.8975	-1.3592	0.24854	1
WBGene00018601	F48C1.9	Unassigned: regulated by multiple stresses	7.39169	18.9273	-1.3565	0.079115	1
WBGene00016847	C50F7.9	Transmembrane protein: unassigned	0.709727	1.81518	-1.3548	0.60572	1
WBGene00017216	F07F6.2	Transmembrane protein: unassigned	5.08122	12.9932	-1.3545	0.11251	1
WBGene00005242	srh-17	Transmembrane protein: seven transmembrane receptor: srh	0.72597	1.85463	-1.3531	0.60202	1
WBGene00005182	srg-25	Transmembrane protein: seven transmembrane receptor: srg	1.04676	2.66938	-1.3506	0.46868	1
WBGene00021740	Y50D4B.1	Unassigned	2.71884	6.92348	-1.3485	0.35789	1
WBGene00011255	R12H7.4	Transmembrane protein: unassigned	5.06873	12.8975	-1.3474	0.079421	1
WBGene00019165	mpz-4	Development: apoptosis	1.29939	3.30459	-1.3466	0.44041	1
WBGene00018688	F52D2.6	Unassigned	8.61418	21.8754	-1.3445	0.020531	0.71859
WBGene00014646	B0399.t3	Pseudogene	0.337028	0.854199	-1.3417	0.84154	1
WBGene00018296	F41F3.1	Transmembrane protein: unassigned	0.337028	0.854199	-1.3417	0.84154	1
WBGene00021067	W06H8.4	Pseudogene	0.337028	0.854199	-1.3417	0.84154	1
WBGene00018573	oac-30	Metabolism: lipid: o-acyl transferase	26.9579	68.2771	-1.3407	0.051817	1
WBGene00005914	srx-23	Transmembrane protein: seven transmembrane receptor: srx	1.063	2.69185	-1.3405	0.5402	1
WBGene00011136	R08A2.5	Unassigned	10.425	26.3994	-1.3405	0.018732	0.68757
WBGene00019495	sdz-24	Unassigned	326.626	826.263	-1.339	0.0026742	0.19128
WBGene00044125	srsx-16	Transmembrane protein: seven transmembrane receptor: srsx	0.657814	1.66353	-1.3385	0.72507	1
WBGene00023187	Y67D8C.12	Non-coding RNA: ncRNA	1.74024	4.40025	-1.3383	0.34406	1
WBGene00197405	K02F6.10	Non-coding RNA: ncRNA	0.777883	1.96684	-1.3383	0.53865	1
WBGene00189979	W04A8.8	Non-coding RNA: ncRNA	0.72597	1.83491	-1.3377	0.60332	1
WBGene00219414	F14H3.15	Unassigned	1.74024	4.3975	-1.3374	0.30281	1
WBGene00016785	C49G7.7	Unassigned	8.88624	22.4311	-1.3359	0.022552	0.75396
WBGene00007876	dct-19	Unassigned	20.5192	51.7874	-1.3356	0.01736	0.65809
WBGene00022249	Y73B6BL.28	Pseudogene	2.67998	6.76358	-1.3356	0.22574	1
WBGene00013644	Y105C5A.25	Pseudogene	13.0144	32.8366	-1.3352	0.010165	0.4771
WBGene00047727	21ur-3861	NA	0.388942	0.980706	-1.3343	0.82807	1
WBGene00199106	F54D7.8	Non-coding RNA: ncRNA	0.388942	0.980706	-1.3343	0.82807	1
WBGene00019646	K11D12.6	Proteolysis general: inhibitor: serine	4.57915	11.5346	-1.3328	0.11885	1
WBGene00019089	clec-206	Stress response: C-type Lectin	4.3164	10.8543	-1.3304	0.36092	1
WBGene00219660	linc-19	Non-coding RNA: linc	5.05249	12.6981	-1.3295	0.065625	1
WBGene00010904	ugt-62	Stress response: detoxification: ugt	958.902	2407.86	-1.3283	0.00061718	0.062356
WBGene00200645	R03E9.9	Non-coding RNA: ncRNA	5.26945	13.2287	-1.3279	0.080434	1
WBGene00044571	C46F4.3	Unassigned	2.76757	6.94588	-1.3275	0.22062	1
WBGene00017454	irld-5	Pseudogene	1.9572	4.90895	-1.3266	0.3328	1
WBGene00013487	egas-2	Transmembrane transport: sodium channel	0.72597	1.81793	-1.3243	0.71288	1
WBGene00019845	irld-13	Pseudogene	3.14027	7.8565	-1.323	0.16466	1
WBGene00022469	Y119C1B.3	Transmembrane protein: unassigned	37.1592	92.9315	-1.3224	0.0006263	0.062949
WBGene00007656	pals-2	Unassigned: ALS2cr12 domain	2.0416	5.10547	-1.3223	0.35175	1
WBGene00008269	C53A5.11	Unassigned	2.39805	5.99644	-1.3222	0.2671	1
WBGene00005474	srh-268	Transmembrane protein: seven transmembrane receptor: srh	0.72597	1.81518	-1.3221	0.60463	1
WBGene00220121	W06A7.12	Non-coding RNA: snoRNA	0.72597	1.81518	-1.3221	0.60463	1
WBGene00189957	M03F8.7	Transmembrane protein: seven transmembrane receptor: unassigned	1.28314	3.20056	-1.3186	0.5087	1
WBGene00006212	str-168	Transmembrane protein: seven transmembrane receptor: str	3.72674	9.28949	-1.3177	0.15309	1
WBGene00015271	C01B4.7	Transmembrane transport: major facilitator	12.1985	30.4055	-1.3176	0.27919	1
WBGene00202006	C13C4.12	Non-coding RNA: ncRNA	0.709727	1.76757	-1.3164	0.60896	1
WBGene00005683	sru-20	Transmembrane protein: seven transmembrane receptor: sru	3.10778	7.73274	-1.3151	0.1868	1
WBGene00050914	T12B5.15	Unassigned: regulated by multiple stresses	113.884	283.366	-1.3151	0.032228	0.90224
WBGene00001698	grd-9	Signaling: hedgehog-like	4.30016	10.6945	-1.3144	0.2447	1
WBGene00019849	oac-40	Metabolism: lipid: o-acyl transferase	5.34691	13.2966	-1.3143	0.091981	1
WBGene00021207	ptp-5.3	Signaling: phosphatase: Y	1.87655	4.65052	-1.3093	0.29081	1
WBGene00018541	nhr-186	Transcription factor: NHR	4.13511	10.245	-1.3089	0.11793	1
WBGene00020802	btb-2	Unassigned: regulated by multiple stresses	1.77273	4.39208	-1.3089	0.34328	1
WBGene00016778	nep-3	Proteolysis general: metallopeptidase	2.83572	7.02477	-1.3087	0.21793	1
WBGene00005311	srh-90	Pseudogene	0.337028	0.834477	-1.308	0.84316	1
WBGene00005331	srh-112	Transmembrane protein: seven transmembrane receptor: srh	0.337028	0.834477	-1.308	0.84316	1
WBGene00005621	srj-37	Transmembrane protein: seven transmembrane receptor: srj	0.337028	0.834477	-1.308	0.84316	1
WBGene00005953	srx-62	Transmembrane protein: seven transmembrane receptor: srx	0.337028	0.834477	-1.308	0.84316	1
WBGene00009425	scl-16	Pseudogene	0.337028	0.834477	-1.308	0.84316	1
WBGene00009990	F53F4.7	Unassigned	0.337028	0.834477	-1.308	0.84316	1
WBGene00015068	srt-68	Transmembrane protein: seven transmembrane receptor: srt	0.337028	0.834477	-1.308	0.84316	1
WBGene00166963	21ur-14729	NA	0.337028	0.834477	-1.308	0.84316	1
WBGene00167105	21ur-14515	NA	0.337028	0.834477	-1.308	0.84316	1
WBGene00167207	21ur-9103	NA	0.337028	0.834477	-1.308	0.84316	1
WBGene00199052	F32A6.10	Non-coding RNA: ncRNA	0.674057	1.66895	-1.308	0.69479	1
WBGene00007526	NA	NA	7.76758	19.2312	-1.3079	0.053994	1
WBGene00018432	irld-33	Unassigned: receptor L domain	2.39805	5.93728	-1.3079	0.26845	1
WBGene00011992	T24D5.4	Signaling: unassigned	1.11491	2.75919	-1.3073	0.53468	1
WBGene00045164	F59C6.15	Non-coding RNA: snoRNA	0.777883	1.92472	-1.307	0.77783	1
WBGene00206393	W04G5.16	Unassigned	1.97344	4.88106	-1.3065	0.3469	1
WBGene00219266	mir-4938	Non-coding RNA: miRNA	0.388942	0.960984	-1.305	0.82946	1
WBGene00219689	linc-41	Non-coding RNA: linc	4.39092	10.849	-1.305	0.14024	1
WBGene00220154	Y41D4B.35	Non-coding RNA: ncRNA	0.388942	0.960984	-1.305	0.82946	1
WBGene00005582	sri-70	Transmembrane protein: seven transmembrane receptor: sri	1.33187	3.28487	-1.3024	0.43985	1
WBGene00021189	NA	NA	14.2401	35.1212	-1.3024	0.010919	0.49973
WBGene00003114	mab-23	Transcription factor: ZF	1.63641	4.03503	-1.302	0.40806	1
WBGene00012190	W02A2.5	Transmembrane protein: unassigned	6.13116	15.1091	-1.3012	0.063064	1
WBGene00015618	C08G5.6	Transmembrane protein: unassigned	7.37864	18.1716	-1.3003	0.061902	1
WBGene00015375	C03B1.4	Unassigned	1.41945	3.49569	-1.3002	0.3757	1
WBGene00202500	K09H11.15	Unassigned	0.709727	1.74784	-1.3002	0.61032	1
WBGene00195410	C39B5.15	Non-coding RNA: ncRNA	0.72597	1.78729	-1.2998	0.67414	1
WBGene00044791	bnc-1	Nucleic acid: binding: unassigned	1.82464	4.48457	-1.2974	0.29738	1
WBGene00077698	lurp-4	NA	12.0709	29.6475	-1.2964	0.055785	1
WBGene00020650	T21D12.11	Unassigned	1.16683	2.86323	-1.2951	0.45305	1
WBGene00020220	clec-140	Stress response: C-type Lectin	3.03644	7.44641	-1.2942	0.21519	1
WBGene00045366	Y17D7C.3	Pseudogene	189.532	464.524	-1.2933	0.0030361	0.2074
WBGene00010253	F58E6.4	Unassigned: membrane spanning domain	2.6475	6.48267	-1.292	0.28471	1
WBGene00044239	C33D9.10	NA	2.46621	6.03856	-1.2919	0.24124	1
WBGene00005282	srh-60	Transmembrane protein: seven transmembrane receptor: srh	0.72597	1.77574	-1.2904	0.60729	1
WBGene00014645	B0399.t2	Pseudogene	0.777883	1.90225	-1.2901	0.59566	1
WBGene00022731	ZK402.5	Unassigned	9.39762	22.9799	-1.29	0.046591	1
WBGene00012227	W03H9.1	Unassigned	2.36238	5.76865	-1.288	0.34688	1
WBGene00020578	T19D12.3	Pseudogene	3.90191	9.52553	-1.2876	0.16545	1
WBGene00018844	F54H12.4	Unassigned	3.71368	9.06169	-1.2869	0.1931	1
WBGene00017511	srbc-41	Transmembrane protein: seven transmembrane receptor: srbc	0.674057	1.64381	-1.2861	0.72527	1
WBGene00018198	F39E9.6	Proteolysis general: metallopeptidase	1.34811	3.28487	-1.2849	0.43915	1
WBGene00019991	R09H3.3	Unassigned: regulated by multiple stresses	1.45194	3.53788	-1.2849	0.42453	1
WBGene00022796	ZK688.1	Unassigned	3.81432	9.29011	-1.2843	0.34875	1
WBGene00219418	F44D12.19	Unassigned	1.75648	4.2765	-1.2837	0.3958	1
WBGene00015950	C18A11.4	Unassigned	6.93198	16.8671	-1.2829	0.29244	1
WBGene00010212	fbxa-192	Proteolysis proteasome: E3: F box	266.226	647.585	-1.2824	0.02624	0.82001
WBGene00050911	Y43F8B.18	Unassigned	5.59954	13.6087	-1.2812	0.20538	1
WBGene00044952	Y24D9A.9	Non-coding RNA: snoRNA	6.103	14.8189	-1.2799	0.63818	1
WBGene00001695	grd-6	Signaling: hedgehog-like	208.418	505.886	-1.2793	0.085855	1
WBGene00005120	srd-42	Transmembrane protein: seven transmembrane receptor: srd	0.641571	1.55675	-1.2789	0.73243	1
WBGene00008643	tmem-138	Transmembrane protein: unassigned	3.96631	9.62414	-1.2789	0.24558	1
WBGene00005223	srg-66	Transmembrane protein: seven transmembrane receptor: srg	2.00911	4.87501	-1.2788	0.4915	1
WBGene00007894	C33D3.3	Unassigned: regulated by multiple stresses	8.08199	19.5848	-1.277	0.045327	1
WBGene00023481	srz-22	Pseudogene	1.50385	3.64192	-1.276	0.48731	1
WBGene00008949	F19B6.3	Unassigned: regulated by multiple stresses	1.82464	4.41723	-1.2755	0.29948	1
WBGene00013834	clec-261	Stress response: C-type Lectin	0.388942	0.941261	-1.275	0.83087	1
WBGene00196560	C35C5.14	Non-coding RNA: ncRNA	0.388942	0.941261	-1.275	0.83087	1
WBGene00198671	F02G3.4	Non-coding RNA: ncRNA	0.388942	0.941261	-1.275	0.83087	1
WBGene00219583	anr-43	Non-coding RNA: ncRNA	0.388942	0.941261	-1.275	0.83087	1
WBGene00018839	F54H5.2	Cytoskeleton: microtubule: tau tubulin kinase	15.3675	37.0376	-1.2691	0.011181	0.50781
WBGene00197041	F56B3.13	Non-coding RNA: ncRNA	0.777883	1.87435	-1.2688	0.59741	1
WBGene00219424	Y54G2A.72	Unassigned	1.38378	3.33249	-1.268	0.4356	1
WBGene00206371	F28B12.6	Unassigned	4.67604	11.2509	-1.2667	0.13828	1
WBGene00005130	srd-52	Pseudogene	2.61877	6.29975	-1.2664	0.20023	1
WBGene00015436	C04E12.6	Pseudogene	1.82464	4.38933	-1.2664	0.40382	1
WBGene00018092	F36F12.1	Unassigned: Glycosyltransferase family A	9.54781	22.9399	-1.2646	0.1854	1
WBGene00013621	clec-239	Stress response: C-type Lectin	0.320786	0.769887	-1.263	1	1
WBGene00047642	21ur-439	NA	0.320786	0.769887	-1.263	1	1
WBGene00050881	ZK39.10	Transmembrane protein: unassigned	0.320786	0.769887	-1.263	1	1
WBGene00168666	21ur-5896	NA	0.320786	0.769887	-1.263	1	1
WBGene00171224	21ur-7155	NA	0.320786	0.769887	-1.263	1	1
WBGene00172619	21ur-6599	NA	0.320786	0.769887	-1.263	1	1
WBGene00197179	Y47D3B.15	Non-coding RNA: ncRNA	0.320786	0.769887	-1.263	1	1
WBGene00200119	ZC506.8	Non-coding RNA: ncRNA	0.320786	0.769887	-1.263	1	1
WBGene00219584	linc-162	Non-coding RNA: linc	0.320786	0.769887	-1.263	1	1
WBGene00015576	C07G3.8	Unassigned	5.04874	12.1105	-1.2623	0.10803	1
WBGene00015784	C15B12.2	Transmembrane protein: unassigned	6.47807	15.5362	-1.262	0.075337	1
WBGene00010511	sre-7	Transmembrane protein: seven transmembrane receptor: sre	0.641571	1.53702	-1.2605	0.73365	1
WBGene00219322	C33C12.12	Unassigned	9.57654	22.9426	-1.2605	0.03876	0.97488
WBGene00005949	srx-58	Transmembrane protein: seven transmembrane receptor: srx	11.7731	28.2023	-1.2603	0.11789	1
WBGene00015993	C18H7.1	Unassigned: regulated by multiple stresses	252.9	604.359	-1.2568	0.029009	0.85287
WBGene00006071	str-3	Transmembrane protein: seven transmembrane receptor: str	1.09867	2.62177	-1.2548	0.46845	1
WBGene00001737	grl-28	Signaling: hedgehog-like	0.72597	1.73087	-1.2535	0.71749	1
WBGene00018671	F52C6.14	Pseudogene	7.07091	16.8537	-1.2531	0.18204	1
WBGene00022333	fbxa-27	Proteolysis proteasome: E3: F box	10.3057	24.5639	-1.2531	0.024315	0.78226
WBGene00200020	F46F2.12	Non-coding RNA: ncRNA	2.00911	4.7852	-1.252	0.37823	1
WBGene00077557	F15D3.9	Unassigned	1.68833	4.01806	-1.2509	0.4628	1
WBGene00015562	C07D8.2	Pseudogene	2.85515	6.79423	-1.2507	0.24934	1
WBGene00009357	F33C8.2	Unassigned	4.96491	11.7963	-1.2485	0.09637	1
WBGene00164974	F46C3.7	Unassigned	4.7735	11.3264	-1.2466	0.13667	1
WBGene00045050	ZC15.10	Unassigned	9.56904	22.7011	-1.2463	0.045493	1
WBGene00005263	srh-40	Transmembrane protein: seven transmembrane receptor: srh	1.63641	3.88063	-1.2458	0.41365	1
WBGene00023252	C39H7.2	Pseudogene	25.2327	59.8188	-1.2453	0.30988	1
WBGene00011179	R09H10.1	Unassigned: regulated by multiple stresses	11.8444	28.0651	-1.2446	0.027639	0.83592
WBGene00011167	chil-23	Extracellular material: chitinase	7.51176	17.7975	-1.2445	0.057466	1
WBGene00009390	F35C5.1	Unassigned: regulated by multiple stresses	8.08518	19.1435	-1.2435	0.071424	1
WBGene00044299	C42D8.9	Unassigned	1.31563	3.11349	-1.2428	0.51103	1
WBGene00199878	B0491.10	Non-coding RNA: ncRNA	1.03051	2.43884	-1.2428	0.55443	1
WBGene00001548	gcy-23	Signaling: heteromeric G protein: guanylyl cyclase	51.5077	121.884	-1.2427	0.00063097	0.062949
WBGene00008906	oac-17	Metabolism: lipid: o-acyl transferase	3.84999	9.10656	-1.242	0.17119	1
WBGene00005677	sru-14	Pseudogene	1.65266	3.90853	-1.2418	0.41203	1
WBGene00013954	ZK262.9	Unassigned	0.641571	1.5173	-1.2418	0.73489	1
WBGene00018775	NA	NA	1.68833	3.99284	-1.2418	0.35975	1
WBGene00018884	F55E10.5	Pseudogene	2.02536	4.78795	-1.2412	0.42764	1
WBGene00020503	T14B4.9	Extracellular material: PGI	8.54921	20.2058	-1.2409	0.042519	1
WBGene00015281	C01B10.7	Unassigned	9.59891	22.6758	-1.2402	0.031754	0.89391
WBGene00016094	C25E10.4	Transmembrane transport: major facilitator	45.2945	106.956	-1.2396	0.0010327	0.092222
WBGene00011790	T15H9.5	Unassigned: regulated by multiple stresses	1.63641	3.86366	-1.2394	0.46993	1
WBGene00009153	F26D2.15	Metabolism: lipid: sterol	2.09351	4.94023	-1.2387	0.51759	1
WBGene00050910	Y43F8B.17	Unassigned	1.36754	3.2257	-1.238	0.44088	1
WBGene00011552	NA	NA	2.05784	4.85254	-1.2376	0.37485	1
WBGene00023246	C33E10.4	Pseudogene	1.01109	2.38305	-1.2369	0.70464	1
WBGene00077437	Y59H11AR.6	Pseudogene	53.4026	125.843	-1.2366	0.005738	0.32653
WBGene00017498	pud-4	Stress response: heavy metal	27.2334	64.0951	-1.2348	0.21472	1
WBGene00000563	cng-3	Transmembrane transport: nucleotide gated channel	5.89159	13.8639	-1.2346	0.097679	1
WBGene00010854	M04C7.3	Unassigned	4.18702	9.82608	-1.2307	0.14771	1
WBGene00016835	C50F2.1	Pseudogene	1.97344	4.6308	-1.2305	0.38396	1
WBGene00195233	F31E9.11	Non-coding RNA: ncRNA	62.0391	145.527	-1.23	0.00049323	0.052503
WBGene00194929	Y105C5B.1413	Unassigned	1.01109	2.3715	-1.2299	0.55905	1
WBGene00020118	R155.4	Pseudogene	0.709727	1.66353	-1.2289	0.7221	1
WBGene00015788	C15B12.8	Unassigned	14.9786	35.1042	-1.2287	0.022319	0.75396
WBGene00017501	pud-3	Stress response: heavy metal	169.56	396.654	-1.2261	0.081007	1
WBGene00021096	W08F4.7	Unassigned	1.78897	4.17851	-1.2239	0.34975	1
WBGene00018380	decr-1.1	Unassigned: regulated by multiple stresses	14.9879	34.9911	-1.2232	0.014271	0.59004
WBGene00014650	B0399.t7	Pseudogene	0.641571	1.49758	-1.223	0.73614	1
WBGene00007997	sre-13	Transmembrane protein: seven transmembrane receptor: sre	4.43965	10.3627	-1.2229	0.14464	1
WBGene00194644	ZK795.6	Pseudogene	2.7026	6.29158	-1.2191	0.26267	1
WBGene00022884	ZK1248.17	Unassigned: regulated by multiple stresses	0.72597	1.68868	-1.2179	0.61334	1
WBGene00009117	F25H2.3	Unassigned	1.36754	3.18083	-1.2178	0.50599	1
WBGene00219761	linc-143	Non-coding RNA: linc	1.16683	2.71158	-1.2165	0.53449	1
WBGene00009999	srsx-35	Neuronal function: unassigned	2.19734	5.10555	-1.2163	0.36403	1
WBGene00010461	K01D12.1	Transmembrane protein: unassigned	21.9508	50.8909	-1.2131	0.28305	1
WBGene00008812	F14F7.5	Transmembrane protein: unassigned	4.57596	10.6075	-1.2129	0.1408	1
WBGene00005537	sri-25	Transmembrane protein: seven transmembrane receptor: sri	0.994842	2.30416	-1.2117	0.56366	1
WBGene00219590	linc-72	Non-coding RNA: linc	8.97938	20.7939	-1.2115	0.21473	1
WBGene00019764	M03F8.5	Transmembrane protein: unassigned	18.2839	42.3062	-1.2103	0.0084321	0.4154
WBGene00012191	W02A2.8	Unassigned: regulated by multiple stresses	4.49157	10.3825	-1.2089	0.19566	1
WBGene00015973	NA	NA	2.00911	4.63629	-1.2064	0.56925	1
WBGene00006153	str-96	Transmembrane protein: seven transmembrane receptor: str	2.95204	6.80845	-1.2056	0.25431	1
WBGene00017930	F29G9.1	Unassigned: regulated by multiple stresses	28.5307	65.7372	-1.2042	0.003716	0.23691
WBGene00019350	K02H11.9	Unassigned: regulated by multiple stresses	2.05784	4.74033	-1.2039	0.42807	1
WBGene00015453	C04G6.2	Unassigned: regulated by multiple stresses	17.2882	39.8021	-1.2031	0.037538	0.95884
WBGene00000655	col-79	Extracellular material: collagen	18.7659	43.1987	-1.2029	0.014504	0.59505
WBGene00018326	cyp-25A5	Pseudogene	3.95382	9.10114	-1.2028	0.18942	1
WBGene00044534	H23N18.6	Transmembrane protein: unassigned	43.9455	101.123	-1.2023	0.0014895	0.12247
WBGene00000730	col-157	Extracellular material: collagen	124.356	285.864	-1.2009	0.24002	1
WBGene00015361	C02H6.1	Protein modification: carbohydrate	0.388942	0.893644	-1.2001	0.83438	1
WBGene00077759	irld-51	Unassigned: receptor L domain	0.388942	0.893644	-1.2001	0.83438	1
WBGene00006897	ver-4	Development: somatic	27.4257	62.9928	-1.1997	0.0030854	0.20864
WBGene00015863	C16D9.8	Unassigned	1.73706	3.98742	-1.1988	0.40619	1
WBGene00010528	K03D3.2	Unassigned	3.91815	8.99223	-1.1985	0.35133	1
WBGene00019541	K08F11.1	Unassigned	5.41507	12.4112	-1.1966	0.12956	1
WBGene00014319	F09B9.t2	Non-coding RNA: tRNA	0.641571	1.46968	-1.1958	0.73794	1
WBGene00166786	21ur-8039	NA	0.641571	1.46968	-1.1958	0.73794	1
WBGene00005716	srv-5	Transmembrane protein: seven transmembrane receptor: srv	4.60845	10.5538	-1.1954	0.17338	1
WBGene00017658	F21C10.9	Unassigned	122.499	280.333	-1.1944	0.10336	1
WBGene00009148	F26D2.3	Protein modification: carbohydrate	4.47214	10.2307	-1.1939	0.16118	1
WBGene00007213	C01A2.1	Transmembrane protein: unassigned	14.8553	33.9641	-1.193	0.060202	1
WBGene00220010	K07G5.7	Non-coding RNA: ncRNA	2.31047	5.28242	-1.193	0.73497	1
WBGene00010862	M04D8.4	Transmembrane protein: unassigned	0.337028	0.769887	-1.1918	1	1
WBGene00023200	Y97E10C.t1	Non-coding RNA: tRNA	0.337028	0.769887	-1.1918	1	1
WBGene00048880	21ur-2366	NA	0.337028	0.769887	-1.1918	1	1
WBGene00077704	F12A10.9	Unassigned	0.337028	0.769887	-1.1918	1	1
WBGene00196113	F13H6.6	Non-coding RNA: ncRNA	0.337028	0.769887	-1.1918	1	1
WBGene00198416	F49E10.14	Non-coding RNA: ncRNA	0.337028	0.769887	-1.1918	1	1
WBGene00198951	F26F12.17	Non-coding RNA: ncRNA	0.337028	0.769887	-1.1918	1	1
WBGene00199655	C30D11.2	Non-coding RNA: ncRNA	0.674057	1.53977	-1.1918	0.88622	1
WBGene00200491	T06F4.16	Non-coding RNA: ncRNA	0.337028	0.769887	-1.1918	1	1
WBGene00220045	R31.6	Non-coding RNA: ncRNA	0.337028	0.769887	-1.1918	1	1
WBGene00202513	ZK938.10	Unassigned: membrane spanning domain	1.98968	4.54373	-1.1913	0.38616	1
WBGene00020686	T22D1.8	Transmembrane protein: unassigned	2.26549	5.17289	-1.1911	0.44163	1
WBGene00044669	NA	NA	0.777883	1.77574	-1.1908	0.6038	1
WBGene00012425	dlc-4	Cytoskeleton: motor protein: dynein	3.06893	7.00505	-1.1907	0.27727	1
WBGene00005926	srx-35	Pseudogene	5.90784	13.4762	-1.1897	0.10003	1
WBGene00014956	Y102A5C.11	Pseudogene	1.11491	2.54288	-1.1895	0.47179	1
WBGene00016921	C54F6.3	Extracellular material: chondroitin sulfotransferase	3.7656	8.58419	-1.1888	0.1792	1
WBGene00017736	F23C8.7	Signaling: Y kinase	13.6922	31.189	-1.1877	0.31065	1
WBGene00045193	F53B2.10	Pseudogene	0.657814	1.49758	-1.1869	0.73511	1
WBGene00005141	srd-64	Transmembrane protein: seven transmembrane receptor: srd	8.46163	19.2618	-1.1867	0.053682	1
WBGene00011164	chil-21	Extracellular material: chitinase	2.51494	5.72371	-1.1864	0.2707	1
WBGene00013032	wht-9	Pseudogene	1.68833	3.84119	-1.186	0.41319	1
WBGene00016577	clec-3	Stress response: C-type Lectin	35.494	80.7007	-1.185	0.0030493	0.2074
WBGene00019421	K05F6.10	Unassigned: regulated by multiple stresses	2.3299	5.29665	-1.1848	0.40449	1
WBGene00022572	ZC239.14	Transmembrane transport: potassium channel	10.9041	24.7664	-1.1835	0.12584	1
WBGene00015968	C18C4.7	Unassigned	14.3013	32.4171	-1.1806	0.052907	1
WBGene00020532	math-42	Unassigned: meprin-associated Traf homology domain	23.6853	53.6858	-1.1805	0.0077793	0.39466
WBGene00017181	F02E11.3	Unassigned	2.28174	5.17014	-1.1801	0.31668	1
WBGene00016612	C43G2.3	Unassigned: regulated by multiple stresses	1.75648	3.97861	-1.1796	0.46184	1
WBGene00001113	dur-1	Unassigned	929.645	2105.7	-1.1795	0.0046071	0.27775
WBGene00013903	ugt-3	Stress response: detoxification: ugt	6.38061	14.4515	-1.1794	0.11662	1
WBGene00010004	F53H2.1	Unassigned	10.7138	24.2591	-1.1791	0.26196	1
WBGene00173505	21ur-15575	NA	0.641571	1.45271	-1.1791	0.86981	1
WBGene00195214	F11C1.10	Metabolism: unassigned	6.46501	14.6371	-1.1789	0.087463	1
WBGene00045415	Y43F8B.15	Unassigned	5.75847	13.0354	-1.1787	0.11412	1
WBGene00021492	comt-5	Protein modification: methyltransferase	17.4445	39.4847	-1.1785	0.017404	0.65871
WBGene00017994	NA	NA	6.90586	15.6227	-1.1778	0.26388	1
WBGene00011127	fbxb-79	Proteolysis proteasome: E3: F box	0.709727	1.60436	-1.1767	0.72549	1
WBGene00011951	T23F6.3	Unassigned: regulated by multiple stresses	5.01682	11.3407	-1.1767	0.1487	1
WBGene00195492	F36G3.6	Non-coding RNA: ncRNA	0.641571	1.44996	-1.1763	0.73922	1
WBGene00014745	F26D2.8	Pseudogene	1.33187	3.00946	-1.176	0.589	1
WBGene00006183	str-135	Transmembrane protein: seven transmembrane receptor: str	1.41945	3.20598	-1.1754	0.43948	1
WBGene00011492	T05F1.7	Unassigned	9.55018	21.5693	-1.1754	0.050767	1
WBGene00001614	glr-3	Transmembrane transport: glutamate channel	11.9027	26.8687	-1.1746	0.03143	0.88965
WBGene00011191	R10D12.10	Cytoskeleton: microtubule: tau tubulin kinase	2.75133	6.21001	-1.1745	0.33076	1
WBGene00007672	fbxa-136	Proteolysis proteasome: E3: F box	75.2676	169.567	-1.1718	0.00072307	0.07095
WBGene00015259	dod-20	Stress response: unassigned	19.5638	44.0739	-1.1717	0.011663	0.51801
WBGene00005612	srj-24	Transmembrane protein: seven transmembrane receptor: srj	0.674057	1.5173	-1.1706	0.73286	1
WBGene00017092	E02C12.6	Unassigned: regulated by multiple stresses	10.1593	22.85	-1.1694	0.045137	1
WBGene00009283	F31B12.4	Unassigned	7.89752	17.7615	-1.1693	0.06936	1
WBGene00019028	srb-13	Transmembrane protein: seven transmembrane receptor: srb	0.388942	0.873922	-1.168	0.83588	1
WBGene00044279	grl-32	Pseudogene	3.80127	8.53932	-1.1676	0.19912	1
WBGene00012727	Y39G8B.7	Unassigned	4.18702	9.40169	-1.167	0.16903	1
WBGene00009039	F22B3.8	Signaling: Y kinase	1.41945	3.18626	-1.1665	0.48003	1
WBGene00200249	F12F3.8	Non-coding RNA: ncRNA	3.76241	8.44409	-1.1663	0.21967	1
WBGene00014149	fbxb-70	Proteolysis proteasome: E3: F box	3.25658	7.30293	-1.1651	0.30278	1
WBGene00020531	T15B12.2	Cytoskeleton: microtubule: tau tubulin kinase	3.79808	8.50812	-1.1636	0.3317	1
WBGene00016933	C54G7.1	Unassigned	3.54864	7.94898	-1.1635	0.25918	1
WBGene00000255	bli-5	Extracellular material: PGI	11.251	25.1739	-1.1619	0.050679	1
WBGene00013901	ugt-16	Stress response: detoxification: ugt	214	478.778	-1.1617	0.011074	0.50486
WBGene00015257	B0554.4	Unassigned: regulated by multiple stresses	0.72597	1.62409	-1.1616	0.72342	1
WBGene00044917	F40F8.12	Transmembrane protein: unassigned	1.03051	2.30416	-1.1609	0.56167	1
WBGene00017543	lgc-5	Transmembrane transport: extracellular ligand gated channel	0.657814	1.46968	-1.1598	0.73689	1
WBGene00007484	C09G1.2	Unassigned	7.44679	16.6291	-1.159	0.087563	1
WBGene00014873	Y38E10A.t3	Pseudogene	1.97344	4.403	-1.1578	0.49782	1
WBGene00014734	F11A3.3	Pseudogene	1.16683	2.60204	-1.1571	0.46593	1
WBGene00000612	col-35	Extracellular material: collagen	2.126	4.73758	-1.156	0.37621	1
WBGene00007367	nhr-150	Transcription factor: NHR	12.6185	28.1159	-1.1558	0.13642	1
WBGene00001726	grl-17	Signaling: hedgehog-like	2.37863	5.29932	-1.1557	0.31903	1
WBGene00002108	ins-25	Metabolism: insulin	6.78261	15.1084	-1.1554	0.10277	1
WBGene00000428	ceh-1	Transcription factor: homeodomain	3.4773	7.74429	-1.1552	0.23388	1
WBGene00009075	F23B2.7	Transmembrane protein: unassigned	1.3513	3.00946	-1.1552	0.58823	1
WBGene00017026	ipla-4	Signaling: lipid: phospholipase A	4.89675	10.9055	-1.1552	0.32953	1
WBGene00013778	clec-194	Stress response: C-type Lectin	11.4099	25.4012	-1.1546	0.060941	1
WBGene00002118	ins-35	Metabolism: insulin	46.3921	103.144	-1.1527	0.18007	1
WBGene00001575	gei-18	Transmembrane protein: unassigned	13.0144	28.9221	-1.1521	0.04587	1
WBGene00021337	Y34F4.2	Transmembrane protein: unassigned	10.0267	22.2821	-1.152	0.045403	1
WBGene00044183	F09C6.13	Unassigned	8.64292	19.2028	-1.1517	0.28433	1
WBGene00022267	Y73C8C.10	Unassigned	5.77528	12.83	-1.1516	0.092226	1
WBGene00010027	F54B11.4	Unassigned	4.45271	9.88525	-1.1506	0.18267	1
WBGene00014196	ZK1053.1	Transmembrane protein: unassigned	5.94032	13.1783	-1.1496	0.11181	1
WBGene00013166	Y53F4B.20	Proteolysis general: metallopeptidase	18.6177	41.2774	-1.1487	0.015806	0.62061
WBGene00043702	Y54G2A.7	NA	10.8014	23.9453	-1.1485	0.60506	1
WBGene00044154	Y7A5A.10	Unassigned	2.65068	5.87269	-1.1477	0.38143	1
WBGene00015414	C04C3.4	Unassigned	2.53437	5.61425	-1.1475	0.34646	1
WBGene00012754	Y41C4A.7	Unassigned: regulated by multiple stresses	1.36754	3.02918	-1.1473	0.58681	1
WBGene00016211	sdz-3	Pseudogene	4.10262	9.08416	-1.1468	0.27705	1
WBGene00012838	Y43F8C.17	Unassigned	2.63126	5.82232	-1.1458	0.34251	1
WBGene00005840	srw-93	Pseudogene	1.73706	3.84119	-1.1449	0.41141	1
WBGene00009997	F53F4.15	Unassigned	2.71566	6.00187	-1.1441	0.30042	1
WBGene00009458	F36A2.11	Unassigned: regulated by multiple stresses	0.72597	1.60436	-1.144	0.72455	1
WBGene00044043	Y46G5A.38	Unassigned: regulated by multiple stresses	30.1689	66.6699	-1.144	0.18616	1
WBGene00009255	ugt-34	Stress response: detoxification: ugt	0.674057	1.48941	-1.1438	0.7744	1
WBGene00010723	cpg-7	Extracellular material: secreted protein	0.674057	1.48941	-1.1438	0.7744	1
WBGene00045602	21ur-4930	NA	0.674057	1.48941	-1.1438	0.7744	1
WBGene00019019	frpr-10	Signaling: heteromeric G protein: receptor	3.12402	6.89551	-1.1423	0.24926	1
WBGene00014008	ZK596.3	Transmembrane protein: unassigned	23.6819	52.2609	-1.1419	0.035703	0.93756
WBGene00077768	K04G2.12	Transmembrane protein: unassigned	6.44877	14.2148	-1.1403	0.13243	1
WBGene00200436	C34B4.15	Non-coding RNA: ncRNA	0.657814	1.44996	-1.1403	0.73816	1
WBGene00169123	21ur-10037	NA	0.777883	1.71115	-1.1373	0.71576	1
WBGene00013190	Y54E2A.5	Transmembrane protein: unassigned	3.03963	6.68469	-1.137	0.2842	1
WBGene00021032	clec-118	Stress response: C-type Lectin	44.9035	98.6579	-1.1356	0.0014407	0.12011
WBGene00014094	ZK829.3	Unassigned: Glycosyltransferase family A	28.9481	63.5947	-1.1354	0.11249	1
WBGene00009782	F46C5.7	Transmembrane protein: unassigned	2.69941	5.92911	-1.1352	0.33834	1
WBGene00001782	gst-34	Stress response: detoxification: GST	0.388942	0.854199	-1.135	0.8374	1
WBGene00005878	srw-131	Pseudogene	0.388942	0.854199	-1.135	0.8374	1
WBGene00010866	M04D8.8	Transmembrane protein: unassigned	0.388942	0.854199	-1.135	0.8374	1
WBGene00046854	21ur-1164	NA	0.388942	0.854199	-1.135	0.8374	1
WBGene00005264	srh-41	Transmembrane protein: seven transmembrane receptor: srh	0.962357	2.11306	-1.1347	0.66144	1
WBGene00010216	F57G8.7	Unassigned	1.40003	3.07405	-1.1347	0.50911	1
WBGene00005486	srh-281	Transmembrane protein: seven transmembrane receptor: srh	3.67801	8.07006	-1.1337	0.25544	1
WBGene00000960	dgk-3	Signaling: lipid: kinase DAG	24.8072	54.4251	-1.1335	0.0096296	0.45739
WBGene00021587	clec-76	Stress response: C-type Lectin	88.3064	193.491	-1.1317	0.00065883	0.065183
WBGene00005004	spp-19	Signaling: S/T kinase	5.18505	11.3488	-1.1301	0.21831	1
WBGene00008235	C50F4.10	Cytoskeleton: microtubule: tau tubulin kinase	2.75133	6.02159	-1.13	0.29916	1
WBGene00009395	clec-64	Stress response: C-type Lectin	78.9332	172.683	-1.1294	0.00088914	0.083467
WBGene00006109	str-44	Transmembrane protein: seven transmembrane receptor: str	1.4357	3.13864	-1.1284	0.44171	1
WBGene00020067	clec-158	Stress response: C-type Lectin	1.4357	3.13864	-1.1284	0.44171	1
WBGene00005174	srg-17	Transmembrane protein: seven transmembrane receptor: srg	2.51812	5.50472	-1.1283	0.31022	1
WBGene00012138	T28F4.3	Signaling: phosphatase: Y	6.72457	14.6792	-1.1263	0.09403	1
WBGene00015199	B0454.8	Unassigned: regulated by multiple stresses	3.24034	7.06964	-1.1255	0.30761	1
WBGene00077538	T04F3.5	Unassigned	2.3299	5.08308	-1.1254	0.4102	1
WBGene00077522	T10D4.15	Unassigned	3.12084	6.7969	-1.1229	0.31891	1
WBGene00009857	clec-28	Stress response: C-type Lectin	16.9094	36.8064	-1.1221	0.026342	0.82032
WBGene00016877	C52D10.3	Unassigned: regulated by multiple stresses	69.0462	150.267	-1.1219	0.00086248	0.08223
WBGene00020327	clec-21	Stress response: C-type Lectin	4.74101	10.3151	-1.1215	0.17827	1
WBGene00011594	T07G12.3	Transmembrane protein: unassigned	39.9204	86.8397	-1.1212	0.038238	0.9685
WBGene00011362	cest-1.1	Stress response: detoxification: unassigned	85.2429	185.397	-1.121	0.00057153	0.058739
WBGene00009169	F26F2.4	Unassigned	2.27799	4.9484	-1.1192	0.41538	1
WBGene00021524	Y41D4B.24	Transmembrane protein: seven transmembrane receptor: unassigned	11.4656	24.9067	-1.1192	0.052421	1
WBGene00199391	C32C4.15	Non-coding RNA: ncRNA	0.72597	1.57647	-1.1187	0.72617	1
WBGene00018246	clec-148	Stress response: C-type Lectin	0.709727	1.53977	-1.1174	0.87562	1
WBGene00007896	C33D3.5	Unassigned	2.92331	6.34194	-1.1173	0.28843	1
WBGene00003764	nlp-26	Neuronal function: synaptic function: neuropeptide	63.9644	138.659	-1.1162	0.0086791	0.42406
WBGene00013661	Y105C5B.23	Pseudogene	3.71368	8.05034	-1.1162	0.25517	1
WBGene00235129	ZC518.8	Unassigned	0.709727	1.53702	-1.1148	0.72947	1
WBGene00010273	srm-3	Transmembrane protein: seven transmembrane receptor: srm	3.15651	6.83367	-1.1143	0.31171	1
WBGene00015323	frpr-1	Neuronal function: synaptic function: neurotransmitter receptor	10.3669	22.4365	-1.1139	0.05335	1
WBGene00044780	F18E9.8	Transmembrane protein: seven transmembrane receptor: unassigned	1.74024	3.76505	-1.1134	0.46975	1
WBGene00199437	C08G9.6	Non-coding RNA: ncRNA	1.31563	2.84076	-1.1105	0.52327	1
WBGene00017444	F13H8.12	Unassigned: regulated by multiple stresses	2.02536	4.37236	-1.1102	0.44007	1
WBGene00012214	W02D9.8	Transmembrane protein: unassigned	1.4357	3.09919	-1.1101	0.49355	1
WBGene00014542	W04G5.11	Non-coding RNA: snRNA	2.2455	4.84436	-1.1093	0.47	1
WBGene00020041	R13A1.1	Unassigned	2.0416	4.40025	-1.1079	0.4387	1
WBGene00008758	F13E9.9	Unassigned	0.674057	1.45271	-1.1078	0.86854	1
WBGene00196334	F40F12.11	Non-coding RNA: ncRNA	0.674057	1.45271	-1.1078	0.86854	1
WBGene00020262	ferl-1	Pseudogene	0.962357	2.07362	-1.1075	0.66351	1
WBGene00021621	Y47D7A.9	Unassigned: regulated by multiple stresses	0.962357	2.07362	-1.1075	0.66351	1
WBGene00000989	dhs-26	Metabolism: short chain dehydrogenase	7.78382	16.7584	-1.1063	0.11269	1
WBGene00195209	C07B5.8	Unassigned	1.41945	3.05433	-1.1055	0.50912	1
WBGene00006597	tor-1	Chaperone: unassigned	10.1624	21.8469	-1.1042	0.069948	1
WBGene00016855	C50H11.8	Unassigned	6.05345	13.0068	-1.1034	0.33665	1
WBGene00017960	F31F4.11	Protein modification: carbohydrate	11.7406	25.2248	-1.1033	0.062122	1
WBGene00003520	nas-1	Proteolysis general: metallopeptidase	20.4673	43.9323	-1.102	0.094855	1
WBGene00005068	srb-3	Transmembrane protein: seven transmembrane receptor: srb	0.388942	0.834477	-1.1013	0.83895	1
WBGene00005306	srh-85	Transmembrane protein: seven transmembrane receptor: srh	0.388942	0.834477	-1.1013	0.83895	1
WBGene00005699	sru-36	Transmembrane protein: seven transmembrane receptor: sru	0.388942	0.834477	-1.1013	0.83895	1
WBGene00009890	scl-9	Extracellular material: secreted protein	0.388942	0.834477	-1.1013	0.83895	1
WBGene00011724	scl-18	Extracellular material: secreted protein	0.388942	0.834477	-1.1013	0.83895	1
WBGene00022094	Y69A2AR.23	Transmembrane protein: unassigned	0.388942	0.834477	-1.1013	0.83895	1
WBGene00045487	C08E8.7	Pseudogene	0.388942	0.834477	-1.1013	0.83895	1
WBGene00194799	Y70C5A.4	Transmembrane protein: seven transmembrane receptor: unassigned	0.388942	0.834477	-1.1013	0.83895	1
WBGene00200566	F10E9.18	Non-coding RNA: ncRNA	0.388942	0.834477	-1.1013	0.83895	1
WBGene00219809	C09H10.20	Non-coding RNA: ncRNA	0.388942	0.834477	-1.1013	0.83895	1
WBGene00004000	pgp-6	Transmembrane transport: ABC	87.6474	187.928	-1.1004	0.00086981	0.082301
WBGene00003531	nas-12	Proteolysis general: metallopeptidase	15.8438	33.9513	-1.0995	0.058891	1
WBGene00009824	gpdh-1	Metabolism: lipid: phospholipid	36.6928	78.5759	-1.0986	0.018117	0.67287
WBGene00012689	Y39B6A.30	Signaling: phosphatase: Y	6.38436	13.6673	-1.0981	0.10865	1
WBGene00010957	nduo-6	Metabolism: mitochondria: complex I	426.014	911.67	-1.0976	0.22729	1
WBGene00007853	C31G12.4	Unassigned	1.74024	3.72018	-1.0961	0.53619	1
WBGene00018515	F46G11.2	Unassigned	51.8684	110.884	-1.0961	0.11787	1
WBGene00007364	stdh-3	Metabolism: lipid: sterol	1.36754	2.9224	-1.0956	0.59106	1
WBGene00016755	C49A9.1	Unassigned	7.21041	15.3981	-1.0946	0.11029	1
WBGene00008105	C45B11.2	Unassigned	5.65839	12.0772	-1.0938	0.14333	1
WBGene00000755	col-182	Pseudogene	36.3923	77.6432	-1.0932	0.18618	1
WBGene00015086	NA	NA	1.01109	2.15251	-1.0901	0.65692	1
WBGene00006631	tsp-5	Extracellular material: PGI	0.641571	1.36565	-1.0899	0.87335	1
WBGene00007079	AC8.7	Pseudogene	0.320786	0.682825	-1.0899	1	1
WBGene00022429	Y108F1.1	Proteolysis general: metallopeptidase	0.320786	0.682825	-1.0899	1	1
WBGene00022528	srt-13	Transmembrane protein: seven transmembrane receptor: srt	0.641571	1.36565	-1.0899	0.87335	1
WBGene00008616	fbxa-44	Proteolysis proteasome: E3: F box	35.4616	75.4239	-1.0888	0.007962	0.40307
WBGene00010603	nhr-198	Transcription factor: NHR	4.39092	9.33718	-1.0885	0.45714	1
WBGene00005710	sru-47	Transmembrane protein: seven transmembrane receptor: sru	2.3299	4.9539	-1.0883	0.60209	1
WBGene00046724	21ur-486	NA	0.674057	1.43299	-1.0881	0.86931	1
WBGene00199296	F45D3.9	Non-coding RNA: ncRNA	1.8084	3.84119	-1.0868	0.40884	1
WBGene00010833	M03B6.1	Unassigned: regulated by multiple stresses	35.3278	75.0239	-1.0865	0.0043022	0.26557
WBGene00010182	F57A8.7	Transmembrane transport: major facilitator	2.92331	6.20726	-1.0864	0.29127	1
WBGene00009257	F29G6.1	Proteolysis general: inhibitor: serine	84.9423	180.321	-1.086	0.073315	1
WBGene00015985	C18G1.7	Unassigned: Glycosyltransferase family A	3.71368	7.87622	-1.0847	0.25806	1
WBGene00007633	C16D2.1	Unassigned	1.04676	2.21985	-1.0845	0.65184	1
WBGene00044034	Y38E10A.28	Transmembrane protein: unassigned	33.243	70.4804	-1.0842	0.011481	0.51357
WBGene00012046	T26E4.4	Protein modification: carbohydrate	21.8085	46.2343	-1.0841	0.2053	1
WBGene00003647	nhr-57	Stress response: pathogen: transcriptional regulator	108.768	230.561	-1.0839	0.034389	0.92176
WBGene00050974	Y6G8.9	Pseudogene	1.67208	3.5433	-1.0834	0.48041	1
WBGene00194650	C36A4.14	Pseudogene	96.3939	204.194	-1.0829	0.0012906	0.11109
WBGene00012728	Y39G8B.9	Unassigned: regulated by multiple stresses	647.26	1370.56	-1.0823	0.0026874	0.19128
WBGene00010763	K10H10.7	Signaling: phosphatase: unassigned	1.75648	3.71743	-1.0816	0.47087	1
WBGene00021273	Y23H5B.2	Pseudogene	1.4357	3.03735	-1.0811	0.58386	1
WBGene00008640	F10B5.3	Nucleic acid: binding: zinc finger	5.61897	11.8861	-1.0809	0.19481	1
WBGene00235300	T06A10.107	Unassigned: membrane spanning domain	0.777883	1.64381	-1.0794	0.7194	1
WBGene00012371	W09G3.8	Transmembrane protein: ER	29.1444	61.5492	-1.0785	0.60301	1
WBGene00008708	F11E6.4	Unassigned	21.1808	44.7194	-1.0781	0.021904	0.74504
WBGene00009488	oac-20	Metabolism: lipid: o-acyl transferase	56.2261	118.68	-1.0778	0.0020623	0.15611
WBGene00012270	W04G5.10	Signaling: FGF	20.7043	43.6971	-1.0776	0.021263	0.73165
WBGene00015395	nhr-147	Transcription factor: NHR	21.5985	45.5769	-1.0774	0.019406	0.69885
WBGene00014121	ZK858.8	Unassigned: regulated by multiple stresses	2.46621	5.18986	-1.0734	0.40372	1
WBGene00011646	T09B9.5	Transmembrane protein: unassigned	2.67998	5.6394	-1.0733	0.38636	1
WBGene00018360	irld-8	Transmembrane protein: unassigned	4.59221	9.65746	-1.0725	0.22466	1
WBGene00019886	R05D8.9	Metabolism: lipid: sterol	3.84999	8.09521	-1.0722	0.22728	1
WBGene00020377	T09B4.3	Unassigned: regulated by multiple stresses	10.0235	21.0545	-1.0707	0.066236	1
WBGene00172649	21ur-8645	NA	1.29939	2.72855	-1.0703	0.60208	1
WBGene00198445	F43G6.14	Non-coding RNA: ncRNA	0.709727	1.48941	-1.0694	0.75135	1
WBGene00199903	W07E11.6	Non-coding RNA: ncRNA	0.709727	1.48941	-1.0694	0.75135	1
WBGene00009620	fip-5	Unassigned: regulated by multiple stresses	219.744	460.291	-1.0667	0.00051665	0.054509
WBGene00013938	ZK218.4	Transmembrane protein: unassigned	6.50068	13.6082	-1.0658	0.17354	1
WBGene00011210	R10E8.4	Pseudogene	2.32671	4.86676	-1.0647	0.41716	1
WBGene00003542	nas-23	Proteolysis general: metallopeptidase	31.1348	65.0956	-1.064	0.24581	1
WBGene00005213	srg-56	Transmembrane protein: seven transmembrane receptor: srg	0.9786	2.04573	-1.0638	0.66413	1
WBGene00011467	decr-1.3	Metabolism: lipid: beta oxidation	0.72597	1.5173	-1.0635	0.72968	1
WBGene00008044	C40H1.9	Unassigned: regulated by multiple stresses	3.07211	6.41808	-1.0629	0.32197	1
WBGene00010467	K01D12.8	Unassigned: regulated by multiple stresses	6.60451	13.7933	-1.0624	0.62124	1
WBGene00044585	C40H5.8	Pseudogene	9.99422	20.8662	-1.062	0.099046	1
WBGene00235310	R02D1.2	Unassigned	51.9457	108.447	-1.0619	0.0031725	0.21248
WBGene00012137	asic-2	Transmembrane transport: sodium channel	32.2969	67.37	-1.0607	0.0069865	0.37263
WBGene00022601	ZC404.1	Unassigned	14.12	29.4503	-1.0605	0.033574	0.91909
WBGene00015118	B0294.3	Proteolysis proteasome: E3: F box	5.37009	11.1944	-1.0598	0.19764	1
WBGene00017788	F25E5.7	Unassigned	8.16027	17.008	-1.0595	0.10937	1
WBGene00017271	F08F8.6	Transmembrane protein: unassigned	2.61501	5.4483	-1.059	0.43855	1
WBGene00010953	clec-190	Stress response: C-type Lectin	14.4307	30.0342	-1.0575	0.5004	1
WBGene00017204	F07C4.11	Unassigned: regulated by multiple stresses	1.98968	4.13907	-1.0568	0.44875	1
WBGene00005690	sru-27	Transmembrane protein: seven transmembrane receptor: sru	1.65266	3.43652	-1.0562	0.48531	1
WBGene00008663	eak-6	Signaling: phosphatase: Y	12.4279	25.8425	-1.0562	0.055084	1
WBGene00168589	21ur-13782	NA	1.36754	2.84076	-1.0547	0.52086	1
WBGene00206374	K10G6.9	Unassigned: membrane spanning domain	5.0618	10.509	-1.0539	0.31218	1
WBGene00008559	appg-2	Unassigned: regulated by multiple stresses	49.7496	103.194	-1.0526	0.13683	1
WBGene00016491	acdh-5	Metabolism: unassigned	2.75133	5.70131	-1.0512	0.42908	1
WBGene00007141	pitr-4	Transmembrane transport: solute carrier	38.362	79.4859	-1.051	0.047219	1
WBGene00005931	fbxa-199	Proteolysis proteasome: E3: F box	8.30589	17.1997	-1.0502	0.10914	1
WBGene00008122	C47A4.1	Chaperone: DnaJ domain	1.063	2.20013	-1.0494	0.652	1
WBGene00005726	srv-15	Transmembrane protein: seven transmembrane receptor: srv	4.67979	9.67718	-1.0481	0.2233	1
WBGene00005770	srw-23	Transmembrane protein: seven transmembrane receptor: srw	0.320786	0.663102	-1.0476	1	1
WBGene00021705	NA	NA	0.320786	0.663102	-1.0476	1	1
WBGene00044923	T27E4.10	Non-coding RNA: snRNA	0.641571	1.3262	-1.0476	0.87501	1
WBGene00166564	21ur-10979	NA	0.320786	0.663102	-1.0476	1	1
WBGene00196944	T01C3.12	Non-coding RNA: ncRNA	0.320786	0.663102	-1.0476	1	1
WBGene00198086	F55A8.5	Non-coding RNA: ncRNA	0.320786	0.663102	-1.0476	1	1
WBGene00201920	C33D12.15	Non-coding RNA: ncRNA	0.320786	0.663102	-1.0476	1	1
WBGene00202483	F26G1.14	Non-coding RNA: ncRNA	0.320786	0.663102	-1.0476	1	1
WBGene00219715	anr-18	Non-coding RNA: ncRNA	0.962357	1.98931	-1.0476	0.77019	1
WBGene00235132	ZK792.12	Transmembrane protein: unassigned	0.320786	0.663102	-1.0476	1	1
WBGene00015364	npr-19	Neuronal function: synaptic function: neuropeptide	16.0828	33.2269	-1.0468	0.09154	1
WBGene00007716	fbxa-82	Proteolysis proteasome: E3: F box	9.43704	19.4781	-1.0454	0.097203	1
WBGene00021086	W08E12.5	Unassigned	0.674057	1.39079	-1.045	0.77175	1
WBGene00013098	Y51H4A.1	Unassigned	3.72993	7.69329	-1.0445	0.28895	1
WBGene00005032	sra-6	Transmembrane protein: seven transmembrane receptor: sra	3.84999	7.94088	-1.0444	0.31389	1
WBGene00014735	cyp-35D2	Pseudogene	1.75648	3.62219	-1.0442	0.47431	1
WBGene00010800	srsx-37	Transmembrane protein: seven transmembrane receptor: srsx	1.09867	2.26472	-1.0436	0.5601	1
WBGene00004856	sma-2	Signaling: TGF beta	85.9949	176.945	-1.041	0.0014689	0.12161
WBGene00020791	T25B6.5	Unassigned	2.0416	4.20098	-1.041	0.50188	1
WBGene00010187	F57B1.1	Transmembrane protein: unassigned	7.69999	15.828	-1.0396	0.13859	1
WBGene00197093	C08F8.11	Non-coding RNA: ncRNA	1.29939	2.66938	-1.0387	0.6047	1
WBGene00019473	cyp-35A5	Stress response: detoxification: CYP	83.6299	171.612	-1.0371	0.015059	0.61169
WBGene00021746	Y50D4B.7	Pseudogene	12.4248	25.4834	-1.0363	0.064593	1
WBGene00014189	nhr-245	Transcription factor: NHR	15.9926	32.7691	-1.0349	0.20961	1
WBGene00003554	nas-38	Proteolysis general: metallopeptidase	88.0011	180.234	-1.0343	0.087207	1
WBGene00009910	srz-92	Pseudogene	2.48245	5.08308	-1.0339	0.4061	1
WBGene00022385	Y95B8A.4	Transmembrane protein: unassigned	3.59736	7.36477	-1.0337	0.23827	1
WBGene00020809	T25G12.1	Pseudogene	8.85057	18.1178	-1.0336	0.17155	1
WBGene00003538	nas-19	Proteolysis general: metallopeptidase	0.709727	1.45271	-1.0334	0.86717	1
WBGene00219651	linc-130	Non-coding RNA: linc	2.16167	4.42273	-1.0328	0.49173	1
WBGene00043998	T21C12.8	Transmembrane protein: unassigned	11.9357	24.4183	-1.0327	0.053489	1
WBGene00017540	F17E9.3	Unassigned	2.55061	5.21776	-1.0326	0.40083	1
WBGene00007638	C17D12.3	Unassigned	5.52151	11.2923	-1.0322	0.61458	1
WBGene00010401	H16D19.3	Nucleic acid: binding: zinc finger	2.09351	4.27917	-1.0314	0.58301	1
WBGene00021745	Y50D4B.6	Signaling: Y kinase	36.9836	75.5667	-1.0309	0.0067421	0.36453
WBGene00016558	pks-1	Unassigned: hydrolase	202.848	414.46	-1.0308	0.13946	1
WBGene00010238	F58B4.5	Unassigned: regulated by multiple stresses	277.933	567.769	-1.0306	0.00048844	0.052225
WBGene00020344	NA	NA	2.14542	4.38053	-1.0298	0.43612	1
WBGene00009601	F40G12.6	Unassigned	12.7937	26.1179	-1.0296	0.07856	1
WBGene00018173	F38B6.3	Transmembrane protein: unassigned	9.52088	19.4358	-1.0296	0.096374	1
WBGene00044446	C06G4.6	Transmembrane protein: unassigned	2.4143	4.92868	-1.0296	0.41212	1
WBGene00017467	F14F9.4	Unassigned: regulated by multiple stresses	81.9171	167.179	-1.0292	0.0026101	0.18859
WBGene00044432	W03G9.9	Unassigned	1.3513	2.75644	-1.0285	0.59863	1
WBGene00015720	C13A2.3	Transmembrane protein: unassigned	7.019	14.3106	-1.0278	0.15238	1
WBGene00010928	clec-258	Stress response: C-type Lectin	1.38378	2.82103	-1.0276	0.52419	1
WBGene00000642	col-66	Pseudogene	1.09867	2.23957	-1.0275	0.64841	1
WBGene00005183	srg-26	Transmembrane protein: seven transmembrane receptor: srg	2.02217	4.12209	-1.0275	0.50494	1
WBGene00189980	F02C12.7	Non-coding RNA: ncRNA	2.9358	5.98215	-1.0269	0.37183	1
WBGene00019053	F58F6.5	Transmembrane protein: unassigned	1.74024	3.5433	-1.0258	0.47783	1
WBGene00001429	fkb-4	Chaperone: cyclophilin	158.924	323.472	-1.0253	0.022574	0.75396
WBGene00012729	Y39G8B.10	Unassigned	29.2977	59.6162	-1.0249	0.13892	1
WBGene00014206	nit-1	Metabolism: unassigned	128.269	260.913	-1.0244	0.0012283	0.1065
WBGene00015706	C12D5.3	Unassigned	52.9197	107.632	-1.0242	0.069499	1
WBGene00201385	F10E9.20	Non-coding RNA: ncRNA	0.9786	1.98931	-1.0235	0.76951	1
WBGene00007864	irg-6	Stress response: pathogen: CUB	79.0582	160.683	-1.0232	0.0036683	0.23483
WBGene00004567	rrn-2.1	Ribosome: subunit	608.037	1235.22	-1.0225	0.47645	1
WBGene00016875	NA	NA	80.5455	163.473	-1.0212	0.0024295	0.1777
WBGene00020971	W03B1.1	Pseudogene	30.0627	60.9975	-1.0208	0.015603	0.61887
WBGene00013375	srsx-25	Transmembrane protein: seven transmembrane receptor: srsx	16.0346	32.5328	-1.0207	0.19636	1
WBGene00013450	oac-56	Metabolism: lipid: o-acyl transferase	1.65266	3.35221	-1.0203	0.5523	1
WBGene00045497	K03A11.6	Transmembrane protein: unassigned	11.9251	24.1822	-1.02	0.17085	1
WBGene00014761	F46A8.11	Unassigned	33.3662	67.65	-1.0197	0.061265	1
WBGene00019550	K09C4.5	Transmembrane transport: solute carrier	88.3631	179.157	-1.0197	0.012365	0.53998
WBGene00012323	oac-54	Metabolism: lipid: o-acyl transferase	14.2845	28.9477	-1.019	0.057742	1
WBGene00013777	Y116A8A.7	Unassigned	0.337028	0.682825	-1.0186	1	1
WBGene00017875	F28A10.7	Transmembrane protein: unassigned	0.337028	0.682825	-1.0186	1	1
WBGene00018650	F49F1.10	Extracellular material: galectin	0.337028	0.682825	-1.0186	1	1
WBGene00020875	T28A11.13	Metabolism: unassigned	0.674057	1.36565	-1.0186	0.87201	1
WBGene00021010	W03G1.2	Unassigned: regulated by multiple stresses	0.337028	0.682825	-1.0186	1	1
WBGene00044142	H13N06.7	Unassigned	0.337028	0.682825	-1.0186	1	1
WBGene00196527	F55A8.4	Non-coding RNA: ncRNA	0.337028	0.682825	-1.0186	1	1
WBGene00198907	M79.12	Non-coding RNA: ncRNA	0.337028	0.682825	-1.0186	1	1
WBGene00199319	F47D12.10	Non-coding RNA: ncRNA	0.337028	0.682825	-1.0186	1	1
WBGene00011484	T05E11.8	Unassigned: regulated by multiple stresses	39.0615	79.1032	-1.018	0.014088	0.58871
WBGene00008490	F01D4.8	Metabolism: amino acid: synthesis	28.6363	57.9464	-1.0169	0.087777	1
WBGene00004996	spp-11	Unassigned	1.31563	2.66121	-1.0163	0.67593	1
WBGene00020516	T15B7.1	Unassigned: regulated by multiple stresses	713.973	1443.15	-1.0153	0.017192	0.65378
WBGene00006782	unc-46	Neuronal function: synaptic function: neurotransmitter receptor	21.8549	44.1711	-1.0151	0.022477	0.75396
WBGene00044112	srm-5	Transmembrane protein: seven transmembrane receptor: srm	5.40201	10.9163	-1.0149	0.24733	1
WBGene00077757	E02H4.7	Unassigned	75.254	151.994	-1.0142	0.0038766	0.24453
WBGene00018079	NA	NA	6.11549	12.3493	-1.0139	0.18558	1
WBGene00020580	T19D12.5	Cytoskeleton: microtubule: tau tubulin kinase	11.1967	22.6032	-1.0134	0.083926	1
WBGene00005399	srh-184	Transmembrane protein: seven transmembrane receptor: srh	1.36754	2.75919	-1.0127	0.6847	1
WBGene00077553	C26C6.10	Unassigned	0.962357	1.94169	-1.0127	0.77221	1
WBGene00019515	ugt-19	Stress response: detoxification: ugt	139.289	280.869	-1.0118	0.0013456	0.11377
WBGene00017312	pitr-5	Transmembrane transport: solute carrier	146.958	296.241	-1.0114	0.015309	0.61784
WBGene00005696	sru-33	Pseudogene	0.709727	1.43024	-1.0109	0.73609	1
WBGene00012683	asp-17	Proteolysis general: aspartate: cathepsin	128.811	259.558	-1.0108	0.024594	0.78504
WBGene00005053	sra-27	Transmembrane protein: seven transmembrane receptor: sra	2.09351	4.21796	-1.0106	0.5024	1
WBGene00007442	C08E8.6	Unassigned	1.97344	3.97587	-1.0106	0.51122	1
WBGene00005747	srv-36	Pseudogene	1.41945	2.85506	-1.0082	0.59169	1
WBGene00019021	F57H12.6	Unassigned: regulated by multiple stresses	153.785	309.264	-1.0079	0.084358	1
WBGene00000624	col-47	Extracellular material: collagen	25.1918	50.6177	-1.0067	0.1569	1
WBGene00014103	best-26	Transmembrane transport: chloride channel	11.7307	23.5636	-1.0063	0.29083	1
WBGene00195213	F11C1.9	Unassigned	1.9572	3.931	-1.0061	0.57782	1
WBGene00045247	F54H12.8	Transmembrane protein: unassigned	4.43965	8.91004	-1.005	0.31758	1
WBGene00194700	B0025.5	Transmembrane protein: unassigned	1.063	2.13279	-1.0046	0.65531	1
WBGene00007374	C06C3.3	Unassigned	12.2009	24.4768	-1.0044	0.07811	1
WBGene00008961	F19H6.6	Unassigned	5.18187	10.3912	-1.0038	0.19341	1
WBGene00022325	fbxa-5	Proteolysis proteasome: E3: F box	8.69802	17.4411	-1.0037	0.098989	1
WBGene00220054	T01A4.8	Non-coding RNA: ncRNA	1.09867	2.20288	-1.0036	0.77657	1
WBGene00020859	bath-25	Unassigned: regulated by multiple stresses	9.18066	18.4048	-1.0034	0.11152	1
WBGene00006558	tbx-39	Transcription factor: T box	3.63304	7.28046	-1.0029	0.26603	1
WBGene00018235	F40E12.2	Pseudogene	4.93242	9.88257	-1.0026	0.26693	1
WBGene00020431	irld-50	Unassigned: receptor L domain	2.126	4.2574	-1.0018	0.63572	1
WBGene00006687	twk-35	Transmembrane transport: potassium channel	13.0495	26.1267	-1.0015	0.085113	1
WBGene00007506	fbxc-58	Stress response: pathogen: unassigned	26.5996	53.2248	-1.0007	0.022752	0.75437
WBGene00009355	F33A8.7	Unassigned: regulated by multiple stresses	79.8826	159.702	-0.99943	0.11125	1
WBGene00005150	sre-2	Transmembrane protein: seven transmembrane receptor: sre	3.36041	6.71597	-0.99896	0.37553	1
WBGene00006950	wrt-4	Signaling: hedgehog-like	197.465	394.602	-0.9988	0.12739	1
WBGene00195034	F40G9.20	Non-coding RNA: ncRNA	26.5315	53.007	-0.99848	0.021753	0.74309
WBGene00196820	F46C8.11	Non-coding RNA: ncRNA	2.71566	5.42315	-0.99783	0.48841	1
WBGene00044633	F54H12.7	Transmembrane protein: unassigned	1.6689	3.33249	-0.9977	0.55243	1
WBGene00009489	F36G9.13	Transmembrane protein: unassigned	0.674057	1.34593	-0.99766	0.87282	1
WBGene00006027	srx-136	Transmembrane protein: seven transmembrane receptor: srx	3.64553	7.27503	-0.99683	0.3643	1
WBGene00007416	ceh-57	Transcription factor: homeodomain	20.2022	40.2863	-0.99578	0.050226	1
WBGene00016951	C55C3.1	Unassigned: membrane spanning domain	24.0064	47.8553	-0.99526	0.028944	0.85287
WBGene00019980	chil-14	Extracellular material: chitinase	1.65266	3.29304	-0.99463	0.55453	1
WBGene00044135	F08G12.11	Unassigned	1.65266	3.29304	-0.99463	0.55453	1
WBGene00077788	W07G4.8	Unassigned	1.3513	2.69185	-0.99425	0.68775	1
WBGene00219236	K03B4.9	Unassigned	14.1293	28.1439	-0.99413	0.066823	1
WBGene00010963	nduo-4	Metabolism: mitochondria: complex I	4722.69	9403.69	-0.99362	0.11948	1
WBGene00195190	NA	NA	1.063	2.11581	-0.99307	0.76105	1
WBGene00019251	H28G03.3	Unassigned	2.00911	3.99834	-0.99284	0.57419	1
WBGene00023036	F39E9.10	Pseudogene	101.594	202.129	-0.99246	0.001958	0.1506
WBGene00018565	F47E1.1	Unassigned	27.1794	53.9674	-0.98957	0.023656	0.77161
WBGene00015236	B0511.11	Unassigned: regulated by multiple stresses	28.4298	56.4498	-0.98956	0.038853	0.97518
WBGene00219805	C07A12.19	Non-coding RNA: ncRNA	1.68833	3.35221	-0.98952	0.55097	1
WBGene00013074	hmit-1.2	Transmembrane transport: lipid	63.5345	126.109	-0.98906	0.017901	0.66972
WBGene00023424	C53D6.10	Transmembrane protein: unassigned	1.09867	2.1804	-0.98884	0.65123	1
WBGene00005735	srv-24	Transmembrane protein: seven transmembrane receptor: srv	2.98771	5.92636	-0.9881	0.43238	1
WBGene00219243	T23G4.127	Unassigned	1.97344	3.91402	-0.98794	0.71596	1
WBGene00001984	hog-1	Signaling: hedgehog-like	64.7763	128.442	-0.98758	0.064686	1
WBGene00012634	Y38H6C.23	Unassigned	61.1188	121.087	-0.98635	0.0043104	0.26557
WBGene00022071	Y67D8C.7	Unassigned	1.04676	2.07362	-0.98623	0.65912	1
WBGene00198411	C49A1.14	Non-coding RNA: ncRNA	1.4357	2.84351	-0.98592	0.59149	1
WBGene00219455	Y43F8B.29	Unassigned	4.40398	8.72225	-0.98589	0.2644	1
WBGene00022627	ZC513.2	Unassigned	10.0618	19.9276	-0.98588	0.12961	1
WBGene00013615	fbxa-110	Pseudogene	2.34296	4.63897	-0.98547	0.47307	1
WBGene00007078	AC8.6	Pseudogene	0.388942	0.769887	-0.98509	1	1
WBGene00012711	Y39E4A.1	Transmembrane protein: unassigned	0.388942	0.769887	-0.98509	1	1
WBGene00013827	Y116F11B.11	Pseudogene	0.388942	0.769887	-0.98509	1	1
WBGene00017633	F20D6.1	Unassigned	0.777883	1.53977	-0.98509	0.88283	1
WBGene00077495	Y20C6A.4	Unassigned	0.388942	0.769887	-0.98509	1	1
WBGene00196111	C33B4.8	Non-coding RNA: ncRNA	0.388942	0.769887	-0.98509	1	1
WBGene00200602	C24A1.6	Non-coding RNA: ncRNA	0.388942	0.769887	-0.98509	1	1
WBGene00235108	Y69H2.28	Non-coding RNA: ncRNA	0.388942	0.769887	-0.98509	1	1
WBGene00015965	ugt-48	Stress response: detoxification: ugt	206.575	408.451	-0.9835	0.000978	0.08969
WBGene00014030	glb-1	Globin	93.1888	184.128	-0.98248	0.53346	1
WBGene00015964	glb-5	Globin	2.73508	5.40336	-0.98227	0.40829	1
WBGene00019577	lido-6	Unassigned	25.2984	49.9542	-0.98156	0.029339	0.8573
WBGene00008462	E02H4.4	Unassigned	57.9165	114.294	-0.9807	0.0062426	0.34455
WBGene00019386	irld-42	Unassigned: receptor L domain	1.11491	2.20013	-0.98066	0.64951	1
WBGene00010964	ctc-1	Metabolism: mitochondria: complex IV	53246.2	105024	-0.97998	0.12108	1
WBGene00014255	ZK1320.5	Transmembrane protein: unassigned	6.73707	13.2885	-0.97998	0.22252	1
WBGene00011786	T15D6.12	Unassigned: Glycosyltransferase family A	1.41945	2.79864	-0.97939	0.68146	1
WBGene00013066	Y51A2B.2	Transmembrane protein: unassigned	2.3299	4.59135	-0.97865	0.47482	1
WBGene00015077	B0238.13	Pseudogene	3.05268	6.01342	-0.97811	0.36839	1
WBGene00016590	C42C1.12	NA	88.3344	173.909	-0.97728	0.59588	1
WBGene00020973	W03B1.3	Unassigned	62.657	123.297	-0.97659	0.0064577	0.35479
WBGene00005236	srh-10	Transmembrane protein: seven transmembrane receptor: srh	0.337028	0.663102	-0.97636	1	1
WBGene00005565	sri-53	Transmembrane protein: seven transmembrane receptor: sri	0.337028	0.663102	-0.97636	1	1
WBGene00018382	F43C11.5	Pseudogene	0.337028	0.663102	-0.97636	1	1
WBGene00019530	scrm-8	Metabolism: lipid: phospholipid	0.337028	0.663102	-0.97636	1	1
WBGene00168397	21ur-14348	NA	0.337028	0.663102	-0.97636	1	1
WBGene00196631	F26D11.15	Non-coding RNA: ncRNA	0.337028	0.663102	-0.97636	1	1
WBGene00201113	T06F4.17	Non-coding RNA: ncRNA	0.337028	0.663102	-0.97636	1	1
WBGene00235263	Y66H1A.8	Unassigned	1.4357	2.82378	-0.97588	0.5923	1
WBGene00017942	fbxc-37	Pseudogene	8.37086	16.4605	-0.97556	0.1442	1
WBGene00001670	gpa-8	Signaling: heteromeric G protein: G alpha subunit	6.65323	13.0804	-0.97528	0.19303	1
WBGene00023463	srz-82	Transmembrane protein: seven transmembrane receptor: srz	1.67208	3.28487	-0.97419	0.55411	1
WBGene00020584	T19D12.10	Transmembrane transport: major facilitator	10.4151	20.4534	-0.97367	0.14569	1
WBGene00008156	C47E12.13	Unassigned	0.641571	1.25887	-0.97244	0.87793	1
WBGene00011075	R07A4.4	Unassigned	29.5346	57.9029	-0.97123	0.18529	1
WBGene00012649	Y39A1A.10	Unassigned	2.02536	3.97044	-0.97112	0.57454	1
WBGene00022062	Y67D8B.2	Unassigned	6.95402	13.6312	-0.97099	0.24546	1
WBGene00008538	sqrd-1	Stress response: unassigned	204.411	400.641	-0.97084	0.00077187	0.075121
WBGene00189956	Y34F4.6	Transmembrane protein: unassigned	6.19614	12.1364	-0.9699	0.20557	1
WBGene00019674	K12C11.3	Transmembrane transport: solute carrier	53.172	104.142	-0.96982	0.01211	0.53078
WBGene00000749	col-176	Extracellular material: collagen	397.586	778.692	-0.96979	0.069517	1
WBGene00015444	C04F5.2	Transmembrane protein: unassigned	1.75648	3.43927	-0.96941	0.54532	1
WBGene00012616	dct-14	Cilia: IFT: BBSome	3.09154	6.05286	-0.96929	0.45959	1
WBGene00012985	Y48C3A.1	Unassigned	1.97344	3.86366	-0.96925	0.5794	1
WBGene00044261	Y87G2A.20	Unassigned	0.962357	1.88252	-0.96802	0.77478	1
WBGene00171576	21ur-10392	NA	2.99146	5.85022	-0.96764	0.33343	1
WBGene00017842	nep-12	Proteolysis general: metallopeptidase	90.2837	176.54	-0.96746	0.084098	1
WBGene00007823	C30H6.5	Unassigned: regulated by multiple stresses	49.6974	97.1677	-0.96731	0.1672	1
WBGene00001478	fmo-3	Metabolism: FMO	161.803	316.299	-0.96705	0.0015808	0.12803
WBGene00201648	C18F3.12	Non-coding RNA: ncRNA	1.04676	2.04573	-0.96669	0.66055	1
WBGene00005958	srx-67	Transmembrane protein: seven transmembrane receptor: srx	1.36754	2.67213	-0.96641	0.68788	1
WBGene00020670	idpp-9	Unassigned	21.452	41.8892	-0.96546	0.30264	1
WBGene00019773	M04G7.2	Signaling: phosphatase: Y	2.44678	4.77428	-0.9644	0.43126	1
WBGene00010745	dod-17	Stress response: pathogen: CUB	323.96	631.423	-0.96279	0.0014968	0.12251
WBGene00009778	F46C5.1	Unassigned: membrane spanning domain	43.931	85.6006	-0.96238	0.033137	0.91132
WBGene00020983	W03D2.9	Unassigned: regulated by multiple stresses	13.1113	25.5446	-0.96221	0.091432	1
WBGene00011161	chil-18	Extracellular material: chitinase	8.24467	16.0591	-0.96186	0.25293	1
WBGene00017839	F26G1.3	Unassigned	1.31563	2.5626	-0.96186	0.6088	1
WBGene00012847	srxa-15	Transmembrane protein: seven transmembrane receptor: srxa	4.04753	7.88172	-0.96147	0.37878	1
WBGene00235257	T05C7.4	Transmembrane protein: unassigned	2.16167	4.20916	-0.96139	0.49799	1
WBGene00002199	kin-15	Signaling: Y kinase	162.66	316.564	-0.96063	0.0022655	0.16777
WBGene00014991	ZK829.12	Pseudogene	1.01109	1.96684	-0.95997	0.69972	1
WBGene00020483	T13C5.2	Unassigned	1.01109	1.96684	-0.95997	0.69972	1
WBGene00045403	K10H10.12	Transmembrane protein: unassigned	13.3358	25.9411	-0.95994	0.072316	1
WBGene00077439	F55B12.10	Unassigned	3.12084	6.06921	-0.95957	0.36558	1
WBGene00009785	F46C5.10	Unassigned: regulated by multiple stresses	128.251	249.354	-0.95923	0.0029514	0.20476
WBGene00050939	C05G5.7	Development: somatic	147.257	286.187	-0.95863	0.22349	1
WBGene00019791	sdz-25	Unassigned	0.72597	1.41052	-0.95824	0.73631	1
WBGene00007149	B0334.13	Unassigned: regulated by multiple stresses	30.0337	58.3525	-0.95821	0.077028	1
WBGene00013620	fbxa-111	Proteolysis proteasome: E3: F box	1.82464	3.5433	-0.95748	0.4747	1
WBGene00011468	T05C12.4	Transmembrane protein: unassigned	11.7438	22.7969	-0.95694	0.17346	1
WBGene00018199	F39E9.7	Pseudogene	14.991	29.0825	-0.95605	0.089171	1
WBGene00013986	ZK512.7	Unassigned	125.888	244.15	-0.95562	0.052735	1
WBGene00007265	C02F4.5	Unassigned	1.45194	2.81561	-0.95547	0.59197	1
WBGene00008072	C43F9.4	Unassigned: membrane spanning domain	2.83891	5.50472	-0.95533	0.38576	1
WBGene00016831	sre-56	Transmembrane protein: seven transmembrane receptor: sre	1.04676	2.02875	-0.95467	0.7651	1
WBGene00206505	B0250.18	Unassigned	6.6463	12.8777	-0.95425	0.1955	1
WBGene00017150	EGAP5.1	Unassigned	16.1866	31.3553	-0.95391	0.067295	1
WBGene00013564	Y75B8A.34	Transmembrane protein: unassigned	2.16167	4.18668	-0.95366	0.44163	1
WBGene00005481	srh-276	Transmembrane protein: seven transmembrane receptor: srh	1.94096	3.75687	-0.95276	0.58381	1
WBGene00012322	W07A12.4	Unassigned	55.5701	107.485	-0.95175	0.0073139	0.3816
WBGene00012733	NA	NA	21.5773	41.7151	-0.95106	0.54122	1
WBGene00019262	dmsr-12	Transmembrane protein: seven transmembrane receptor: dmsr	15.6399	30.2236	-0.95045	0.058958	1
WBGene00020529	NA	NA	6.94153	13.4143	-0.95044	0.16354	1
WBGene00015708	C12D5.5	Unassigned	8.91179	17.2214	-0.95042	0.30056	1
WBGene00015953	C18B2.2	Extracellular material: chondroitin sulfotransferase	8.62349	16.6624	-0.95025	0.13122	1
WBGene00235313	C25E10.17	Unassigned	1.3513	2.61022	-0.94982	0.6571	1
WBGene00012815	phy-4	Extracellular material: PGI	6.27735	12.1248	-0.94974	0.20489	1
WBGene00006486	zipt-16	Transmembrane transport: solute carrier	51.5681	99.6019	-0.9497	0.0083447	0.4148
WBGene00195238	mir-4805	Non-coding RNA: miRNA	0.641571	1.23914	-0.94966	0.87881	1
WBGene00020360	math-41	Unassigned: meprin-associated Traf homology domain	287.696	555.457	-0.94913	0.0015952	0.1285
WBGene00011851	clec-23	Pseudogene	1.92471	3.71468	-0.94859	0.59299	1
WBGene00195166	W05B10.6	Transmembrane protein: unassigned	5.63896	10.8803	-0.94821	0.245	1
WBGene00015300	C01F1.5	Proteolysis general: metallopeptidase	87.6574	169.13	-0.94818	0.080793	1
WBGene00198001	Y54E10A.24	Non-coding RNA: ncRNA	1.38378	2.66938	-0.94789	0.60098	1
WBGene00001068	dpy-6	Extracellular material: PGI	797.876	1538.68	-0.94745	0.016267	0.63172
WBGene00077504	AC3.13	Pseudogene	1.65266	3.18626	-0.94708	0.59255	1
WBGene00008433	marc-2	Proteolysis proteasome: E3: RING finger	5.19811	10.0199	-0.94681	0.26121	1
WBGene00019909	R06A10.1	Transmembrane transport: major facilitator	32.2258	62.0829	-0.94598	0.01605	0.62636
WBGene00009962	F53B6.7	Signaling: phosphatase: unassigned	3.97006	7.643	-0.94498	0.35177	1
WBGene00021254	Y22D7AL.16	Nucleic acid: binding: zinc finger	41.0918	79.0912	-0.94467	0.1218	1
WBGene00021154	Y4C6A.4	Unassigned: regulated by multiple stresses	0.709727	1.36565	-0.94425	0.87057	1
WBGene00022639	nhr-253	Transcription factor: NHR	1.8084	3.47871	-0.94384	0.5421	1
WBGene00010863	M04D8.5	Transmembrane protein: unassigned	1.36754	2.62994	-0.94344	0.60343	1
WBGene00006929	vit-5	Metabolism: lipid: binding	121172	232847	-0.94233	0.0905	1
WBGene00013904	ugt-6	Stress response: detoxification: ugt	54.9219	105.535	-0.94227	0.060213	1
WBGene00019571	K09E2.2	Unassigned	5.55456	10.6667	-0.94137	0.24848	1
WBGene00009630	F42E8.1	Unassigned	1.16683	2.23957	-0.94063	0.64524	1
WBGene00021701	Y48G9A.7	Unassigned: regulated by multiple stresses	3.05268	5.85846	-0.94044	0.73281	1
WBGene00011023	R05A10.6	Unassigned: Glycosyltransferase family A	11.316	21.7006	-0.93937	0.26774	1
WBGene00005962	srx-71	Pseudogene	0.72597	1.39079	-0.93793	0.74346	1
WBGene00044631	bus-18	Stress response: pathogen: lipid	40.255	77.0843	-0.93727	0.097595	1
WBGene00006139	str-79	Transmembrane protein: seven transmembrane receptor: str	2.51812	4.82189	-0.93725	0.4122	1
WBGene00015215	B0496.6	Transmembrane protein: unassigned	0.777883	1.48941	-0.93711	0.76899	1
WBGene00200366	K08A8.22	Non-coding RNA: ncRNA	0.657814	1.25887	-0.93637	0.87721	1
WBGene00201429	F45H7.14	Non-coding RNA: ncRNA	0.657814	1.25887	-0.93637	0.87721	1
WBGene00219372	NA	NA	14.0774	26.9387	-0.9363	0.079763	1
WBGene00007218	C01A2.6	Unassigned	1.65266	3.16111	-0.93564	0.63291	1
WBGene00020707	wago-10	Non-coding RNA: small RNA: argonaute	4.47214	8.55362	-0.93557	0.32255	1
WBGene00196071	F56F3.8	Non-coding RNA: ncRNA	0.994842	1.90225	-0.93516	0.77251	1
WBGene00019623	K10C9.1	Unassigned	29.279	55.9819	-0.93509	0.036838	0.9496
WBGene00016125	C26B2.2	Unassigned: regulated by multiple stresses	4.90924	9.3826	-0.93449	0.42843	1
WBGene00220226	Y105E8B.15	Non-coding RNA: ncRNA	3.64553	6.9656	-0.93412	0.40902	1
WBGene00016017	C23G10.11	Unassigned	9.46953	18.0845	-0.93339	0.11167	1
WBGene00012290	W05H12.2	DNA: nuclease	15.7626	30.0999	-0.93326	0.07012	1
WBGene00018771	duox-2	Extracellular material: unassigned	2.14542	4.0942	-0.93232	0.50197	1
WBGene00011495	T05F1.11	Stress response: thioredoxin	141.645	270.246	-0.93199	0.0026785	0.19128
WBGene00008596	clec-54	Stress response: C-type Lectin	136.006	259.483	-0.93197	0.003109	0.20941
WBGene00197691	K08F8.9	Non-coding RNA: ncRNA	2.75133	5.24628	-0.93117	0.44021	1
WBGene00007233	C01G10.6	Unassigned	278.624	531.252	-0.93107	0.055878	1
WBGene00021605	Y46H3C.5	Unassigned: regulated by multiple stresses	247.803	472.457	-0.93099	0.00094095	0.0873
WBGene00007326	C05C9.2	Unassigned	2.02536	3.86091	-0.93077	0.51331	1
WBGene00007970	C36A4.10	Unassigned	2.0416	3.89155	-0.93065	0.57644	1
WBGene00020657	lgc-53	Transmembrane transport: extracellular ligand gated channel	18.676	35.576	-0.92972	0.04494	1
WBGene00015359	C02G6.1	Pseudogene	36.6844	69.8507	-0.92911	0.18355	1
WBGene00044455	F23F12.13	Transmembrane transport: solute carrier	67.6076	128.713	-0.9289	0.0080856	0.40503
WBGene00017052	D2024.4	Unassigned: regulated by multiple stresses	51.3855	97.813	-0.92867	0.32815	1
WBGene00016361	drd-10	Unassigned: regulated by multiple stresses	4.42716	8.42648	-0.92855	0.39993	1
WBGene00022245	acp-6	Lysosome: acid phosphatase	1968.03	3745.52	-0.92841	0.0091712	0.44177
WBGene00013293	Y57G11A.5	mRNA functions: processing: splicing	3.42538	6.51874	-0.92833	0.34903	1
WBGene00009849	F48F7.3	Protein modification: carbohydrate	7.22028	13.7292	-0.92712	0.19966	1
WBGene00004020	pho-1	Lysosome: acid phosphatase	800.082	1520.88	-0.92669	0.0011181	0.099482
WBGene00006225	str-181	Transmembrane protein: seven transmembrane receptor: str	0.641571	1.21942	-0.92651	0.8797	1
WBGene00045132	ZK643.9	Non-coding RNA: snoRNA	0.641571	1.21942	-0.92651	0.8797	1
WBGene00000013	abf-2	Stress response: pathogen: ASABF	57.9669	110.128	-0.92588	0.0085294	0.41933
WBGene00044139	F42D1.4	Unassigned	2.59877	4.93685	-0.92576	0.50362	1
WBGene00017091	ttr-40	Unassigned: TransThyretin-Related family domain	25.9456	49.2685	-0.92518	0.030385	0.87395
WBGene00022641	ZK6.6	Transmembrane transport: major facilitator	5.62272	10.6749	-0.92488	0.24757	1
WBGene00001750	gst-2	Stress response: detoxification: GST	11.0961	21.06	-0.92446	0.12024	1
WBGene00014063	clec-143	Stress response: C-type Lectin	15.228	28.8974	-0.92421	0.068659	1
WBGene00045500	T05E12.9	Unassigned	1.28314	2.43342	-0.9233	0.80024	1
WBGene00019383	K04E7.1	Transmembrane protein: unassigned	1.11491	2.11306	-0.92241	0.65372	1
WBGene00003629	nhr-38	Transcription factor: NHR	0.9786	1.85463	-0.92234	0.7753	1
WBGene00010275	acc-1	Transmembrane transport: extracellular ligand gated channel	32.1443	60.8737	-0.92126	0.023622	0.77155
WBGene00185118	K02E2.11	Unassigned	1.77273	3.35496	-0.92032	0.6223	1
WBGene00018031	F35B3.4	Unassigned: regulated by multiple stresses	153.76	290.892	-0.9198	0.22383	1
WBGene00009416	F35E2.9	Unassigned: regulated by multiple stresses	7.90446	14.9432	-0.91875	0.16936	1
WBGene00138725	NA	NA	6.14422	11.6101	-0.91808	0.67298	1
WBGene00011926	sptf-2	Transcription factor: ZF	13.7949	26.0642	-0.91793	0.11434	1
WBGene00014392	F54C8.8	Non-coding RNA: snRNA	0.777883	1.46968	-0.91788	0.72942	1
WBGene00018823	F54E2.1	Unassigned	1338.88	2528.16	-0.91706	0.0010289	0.092222
WBGene00194784	T11F9.22	Unassigned	1.16683	2.20288	-0.9168	0.79667	1
WBGene00010278	degl-2	Transmembrane transport: sodium channel	5.24945	9.90835	-0.91648	0.55648	1
WBGene00003778	nnt-1	Stress response: unassigned	312.947	590.587	-0.91623	0.002953	0.20476
WBGene00169029	21ur-14269	NA	22.1663	41.8191	-0.91579	0.42742	1
WBGene00044395	R12C12.10	Unassigned: regulated by multiple stresses	68.5179	129.234	-0.91543	0.19848	1
WBGene00011799	T16G1.5	Unassigned: regulated by multiple stresses	16.0227	30.2094	-0.91488	0.064621	1
WBGene00021436	Y39A3B.1	Unassigned	10.7164	20.1976	-0.91436	0.12585	1
WBGene00006748	unc-8	Transmembrane transport: ion channel	37.5237	70.6944	-0.91379	0.020528	0.71859
WBGene00005222	srg-65	Transmembrane protein: seven transmembrane receptor: srg	3.24409	6.1114	-0.91369	0.40358	1
WBGene00005752	srw-5	Pseudogene	0.657814	1.23914	-0.91359	0.87808	1
WBGene00195374	R10E8.10	Non-coding RNA: ncRNA	0.657814	1.23914	-0.91359	0.87808	1
WBGene00019961	R08E5.1	Unassigned: regulated by multiple stresses	62.9193	118.507	-0.9134	0.023249	0.76673
WBGene00206417	W04H10.6	Unassigned: membrane spanning domain	31.7679	59.8277	-0.91325	0.026608	0.82298
WBGene00018393	msra-1	Metabolism: 1CC: unassigned	786.173	1479.86	-0.91254	0.049177	1
WBGene00021487	comt-3	Protein modification: methyltransferase	172.147	323.968	-0.91221	0.0024837	0.18055
WBGene00014472	MTCE.33	Metabolism: mitochondria: ribosome	1286.39	2420.7	-0.9121	0.0785	1
WBGene00008545	F07A11.1	Unassigned	10.9084	20.5261	-0.91202	0.10609	1
WBGene00200884	F25D1.10	Non-coding RNA: ncRNA	2.93955	5.52994	-0.91167	0.51365	1
WBGene00013452	Y67A10A.3	Development: somatic	0.72597	1.36565	-0.91161	0.86992	1
WBGene00018630	F49D11.6	Extracellular material: chondroitin sulfotransferase	14.7978	27.8352	-0.91153	0.096707	1
WBGene00000047	acr-8	Neuronal function: synaptic function: neurotransmitter receptor	62.4757	117.419	-0.9103	0.010251	0.47928
WBGene00001715	grl-6	Signaling: hedgehog-like	17.6809	33.2133	-0.90957	0.088227	1
WBGene00005468	srh-262	Pseudogene	1.3513	2.53745	-0.90903	0.6936	1
WBGene00022465	ift-20	Cilia: IFT-B	7.46304	14.0128	-0.90891	0.19512	1
WBGene00016637	C44B12.3	Unassigned	5.43825	10.2083	-0.90853	0.21164	1
WBGene00004098	pqn-2	Unassigned: prion domain	11.3223	21.2449	-0.90794	0.37521	1
WBGene00004677	rrn-3.56	Pseudogene	530.006	994.273	-0.90763	0.46551	1
WBGene00016926	nhr-171	Transcription factor: NHR	4.92924	9.24462	-0.90725	0.30313	1
WBGene00004099	abu-15	Unassigned: prion domain	98.9372	185.545	-0.90719	0.37073	1
WBGene00010832	idpp-8	Unassigned	8.90804	16.7025	-0.90688	0.30581	1
WBGene00077491	K08H10.10	Unassigned	8.71107	16.3285	-0.90647	0.14365	1
WBGene00010510	ent-3	Transmembrane transport: solute carrier	1.36754	2.5626	-0.90602	0.60644	1
WBGene00044359	C16C4.17	Unassigned	1.36754	2.5626	-0.90602	0.60644	1
WBGene00015577	ugt-64	Stress response: detoxification: ugt	450.346	843.764	-0.90581	0.0045712	0.27703
WBGene00021105	NA	NA	3.3085	6.19846	-0.90573	0.48569	1
WBGene00006429	arrd-3	Signaling: heteromeric G protein: arrestin	4.72477	8.84812	-0.90513	0.34241	1
WBGene00003786	npa-1	Metabolism: lipid: binding	12804.8	23977.7	-0.905	0.0020036	0.15263
WBGene00018170	nspb-1	Unassigned	13.04	24.4121	-0.90466	0.15615	1
WBGene00010402	H16D19.4	Pseudogene	11.3655	21.2763	-0.90459	0.12724	1
WBGene00219343	Y17D7C.9	Non-coding RNA: ncRNA	29.9305	56.0053	-0.90395	0.17501	1
WBGene00014992	ZK1025.1	Pseudogene	3.3085	6.19029	-0.90383	0.48586	1
WBGene00000402	cdh-10	Cytoskeleton: cadherin	643.219	1203.37	-0.90369	0.15508	1
WBGene00022645	ZK6.11	Stress response: pathogen: unassigned	3312.64	6197.06	-0.9036	0.0012216	0.1063
WBGene00021043	pck-1	Metabolism: glycolysis	6624.27	12389.4	-0.90327	0.0013572	0.11435
WBGene00007173	B0393.8	Unassigned	148.063	276.884	-0.90307	0.48092	1
WBGene00017998	F33D4.6	Unassigned: regulated by multiple stresses	603.541	1128.53	-0.90292	0.16395	1
WBGene00018921	sago-2	Non-coding RNA: small RNA: argonaute	259.313	484.802	-0.9027	0.016775	0.64203
WBGene00001732	grl-23	Signaling: hedgehog-like	0.709727	1.3262	-0.90197	0.87216	1
WBGene00219695	linc-126	Non-coding RNA: linc	0.709727	1.3262	-0.90197	0.87216	1
WBGene00010965	ctc-2	Metabolism: mitochondria: complex IV	18892	35301.4	-0.90195	0.23088	1
WBGene00219729	anr-44	Non-coding RNA: asRNA	1.63641	3.05708	-0.90161	0.72178	1
WBGene00014173	ZK970.7	Unassigned	101.562	189.68	-0.90121	0.44677	1
WBGene00010246	F58D5.7	Unassigned: regulated by multiple stresses	0.777883	1.45271	-0.90112	0.86462	1
WBGene00200158	Y106G6G.9	Non-coding RNA: ncRNA	0.777883	1.45271	-0.90112	0.86462	1
WBGene00009231	ceh-89	Transcription factor: homeodomain	27.9597	52.1761	-0.90004	0.066323	1
WBGene00019689	K12H6.9	Unassigned	1.55577	2.90267	-0.89976	0.58442	1
WBGene00017436	F13H8.3	Unassigned: regulated by multiple stresses	310.938	579.904	-0.89919	0.35507	1
WBGene00013840	fbxa-151	Proteolysis proteasome: E3: F box	9.06378	16.8956	-0.89847	0.32954	1
WBGene00015736	srsx-11	Transmembrane protein: seven transmembrane receptor: srsx	0.777883	1.44996	-0.89839	0.73062	1
WBGene00220034	M57.3	Non-coding RNA: ncRNA	0.777883	1.44996	-0.89839	0.73062	1
WBGene00008102	C44H9.7	Unassigned: membrane spanning domain	19.7552	36.8209	-0.89829	0.40555	1
WBGene00011530	T06D8.10	Unassigned	359.684	670.137	-0.89772	0.04792	1
WBGene00017020	D1014.7	Unassigned: Glycosyltransferase family A	4.93242	9.18545	-0.89705	0.30393	1
WBGene00007961	C35D6.4	mRNA functions: processing: unassigned	7.07785	13.1783	-0.89678	0.18895	1
WBGene00009810	srm-6	Transmembrane protein: seven transmembrane receptor: srm	5.08122	9.45811	-0.89638	0.27027	1
WBGene00008869	F15G9.6	Unassigned	6.16365	11.4726	-0.89634	0.27605	1
WBGene00005326	srh-107	Pseudogene	1.4357	2.67213	-0.89624	0.68539	1
WBGene00219932	F33E11.7	Non-coding RNA: snoRNA	3.40914	6.34194	-0.89552	0.43342	1
WBGene00199405	T06H11.16	Non-coding RNA: ncRNA	1.04676	1.94711	-0.89541	0.71642	1
WBGene00000729	col-156	Extracellular material: collagen	214.991	399.737	-0.89477	0.24042	1
WBGene00019914	clec-150	Stress response: C-type Lectin	5362.01	9969.31	-0.89472	0.19121	1
WBGene00001690	grd-1	Signaling: hedgehog-like	203.752	378.812	-0.89467	0.1925	1
WBGene00000049	acr-10	Transmembrane transport: nicotinic acid receptor	5.4345	10.1015	-0.89435	0.25692	1
WBGene00018478	otpl-5	Transmembrane protein: unassigned	8.57795	15.9409	-0.89403	0.18599	1
WBGene00011617	T08G3.4	Pseudogene	0.320786	0.595763	-0.89313	1	1
WBGene00011624	T08G5.3	Unassigned: regulated by multiple stresses	46.8228	86.9595	-0.89313	0.14597	1
WBGene00013044	Y49E10.25	Unassigned	0.320786	0.595763	-0.89313	1	1
WBGene00013318	Y57G11C.23	Transmembrane transport: solute carrier	0.320786	0.595763	-0.89313	1	1
WBGene00015003	B0034.2	Unassigned	0.320786	0.595763	-0.89313	1	1
WBGene00015998	srt-59	Transmembrane protein: seven transmembrane receptor: srt	0.320786	0.595763	-0.89313	1	1
WBGene00016398	C34D4.2	Signaling: phosphatase: unassigned	0.320786	0.595763	-0.89313	1	1
WBGene00018081	F36A4.2	Unassigned: regulated by multiple stresses	0.320786	0.595763	-0.89313	1	1
WBGene00020400	T10B11.4	Unassigned	0.320786	0.595763	-0.89313	1	1
WBGene00022640	nhr-254	Transcription factor: NHR	0.320786	0.595763	-0.89313	1	1
WBGene00044523	F37B4.14	Pseudogene	0.320786	0.595763	-0.89313	1	1
WBGene00044664	F59A6.11	Unassigned	0.320786	0.595763	-0.89313	1	1
WBGene00049352	21ur-4157	NA	0.320786	0.595763	-0.89313	1	1
WBGene00050349	21ur-3024	NA	0.320786	0.595763	-0.89313	1	1
WBGene00050477	21ur-1662	NA	0.320786	0.595763	-0.89313	1	1
WBGene00196172	Y50D4B.8	Non-coding RNA: ncRNA	0.641571	1.19153	-0.89313	0.88554	1
WBGene00197674	F58H1.16	Non-coding RNA: ncRNA	0.320786	0.595763	-0.89313	1	1
WBGene00197690	C08G9.5	Non-coding RNA: ncRNA	0.320786	0.595763	-0.89313	1	1
WBGene00199696	H21P03.8	Non-coding RNA: ncRNA	0.320786	0.595763	-0.89313	1	1
WBGene00200250	ZK867.18	Non-coding RNA: ncRNA	0.320786	0.595763	-0.89313	1	1
WBGene00201456	Y65B4BR.10	Non-coding RNA: ncRNA	0.320786	0.595763	-0.89313	1	1
WBGene00219383	Y61B8A.6	Unassigned	0.320786	0.595763	-0.89313	1	1
WBGene00019563	K09C6.9	Unassigned: regulated by multiple stresses	152.588	283.349	-0.89294	0.0043372	0.26585
WBGene00017212	F07E5.7	Unassigned: regulated by multiple stresses	21.9222	40.6985	-0.89258	0.1753	1
WBGene00023277	F29C4.3	Pseudogene	2.02536	3.75962	-0.89241	0.65481	1
WBGene00009600	F40G12.5	Unassigned	1.98968	3.68953	-0.8909	0.58441	1
WBGene00219300	W10G6.6	Transmembrane protein: unassigned	5.45074	10.107	-0.89083	0.30704	1
WBGene00020976	oac-51	Metabolism: lipid: o-acyl transferase	169.581	314.41	-0.89067	0.0055458	0.32016
WBGene00011556	vglu-3	Transmembrane transport: solute carrier	32.8538	60.8818	-0.88995	0.02713	0.8335
WBGene00000185	arg-1	Signaling: Notch	1.77273	3.28487	-0.88987	0.55034	1
WBGene00185005	T03F6.10	Unassigned	28.1298	52.0754	-0.8885	0.040033	0.9907
WBGene00014807	M04D5.1	Stress response: ER	6.85452	12.6642	-0.88563	0.21286	1
WBGene00007938	C34F6.1	Proteolysis general: inhibitor: serine	425.422	785.817	-0.8853	0.18819	1
WBGene00235296	C07G1.15	Transmembrane protein: unassigned	9.29755	17.174	-0.8853	0.20026	1
WBGene00020789	T25B6.3	Unassigned	1.09867	2.02875	-0.88484	0.76304	1
WBGene00018268	F41C3.2	Transmembrane transport: solute carrier	567.879	1048.41	-0.88455	0.0022847	0.16866
WBGene00008150	mam-2	Unassigned: regulated by multiple stresses	107.499	198.411	-0.88417	0.22747	1
WBGene00017991	clec-180	Stress response: C-type Lectin	546.512	1008.62	-0.88406	0.18969	1
WBGene00012501	Y26D4A.3	Unassigned: membrane spanning domain	10.9153	20.1412	-0.88379	0.12462	1
WBGene00014714	C54C8.8	Pseudogene	0.994842	1.83491	-0.88317	0.77545	1
WBGene00016798	ets-8	Transcription factor: ETS	0.994842	1.83491	-0.88317	0.77545	1
WBGene00044380	T24E12.12	Unassigned	2.58253	4.76273	-0.883	0.50877	1
WBGene00015399	cyp-35A1	Stress response: detoxification: CYP	17.8297	32.8671	-0.88236	0.24702	1
WBGene00077772	T02G6.10	Pseudogene	32.5469	59.9807	-0.88198	0.026131	0.81842
WBGene00019290	K02A2.5	Unassigned: regulated by multiple stresses	12.4828	22.9968	-0.88149	0.22373	1
WBGene00011545	T06G6.3	Unassigned	49.5978	91.3438	-0.88103	0.024381	0.78226
WBGene00044630	bus-17	Extracellular material: PGI	60.2094	110.881	-0.88095	0.1988	1
WBGene00194705	NA	NA	5.69088	10.4783	-0.88068	0.22731	1
WBGene00008477	clec-17	Stress response: C-type Lectin	468.137	861.948	-0.88067	0.0029668	0.20504
WBGene00005408	srh-195	Transmembrane protein: seven transmembrane receptor: srh	1.36754	2.51773	-0.88054	0.69373	1
WBGene00220142	Y37F4.15	Non-coding RNA: ncRNA	4.42341	8.14283	-0.88037	0.32997	1
WBGene00016527	fbxa-47	Proteolysis proteasome: E3: F box	6.87019	12.6451	-0.88015	0.2579	1
WBGene00010066	F54F7.6	Transmembrane protein: unassigned	96.8511	178.189	-0.87957	0.0061995	0.34455
WBGene00005925	srx-34	Transmembrane protein: seven transmembrane receptor: srx	3.83057	7.04716	-0.87948	0.33024	1
WBGene00194922	F13E9.19	Unassigned	0.777883	1.43024	-0.87863	0.73182	1
WBGene00016830	sre-55	Transmembrane protein: seven transmembrane receptor: sre	2.43054	4.46759	-0.87822	0.5329	1
WBGene00044387	C27A2.8	Unassigned	14.3463	26.3314	-0.87611	0.10516	1
WBGene00019738	clec-265	Stress response: C-type Lectin	2267.67	4161.93	-0.87604	0.0071297	0.37611
WBGene00015795	C15F1.2	Unassigned: regulated by multiple stresses	263.491	483.57	-0.87597	0.18141	1
WBGene00017018	D1014.5	Transmembrane protein: unassigned	222.834	408.927	-0.87588	0.19818	1
WBGene00008891	clec-42	Stress response: C-type Lectin	326.68	599.266	-0.87532	0.010639	0.49069
WBGene00014759	F46A8.1	Pseudogene	30.8507	56.5888	-0.87521	0.17147	1
WBGene00045316	C49F5.9	Pseudogene	21.0193	38.5509	-0.87505	0.17608	1
WBGene00008834	F14H8.4	Unassigned	12.5767	23.0581	-0.87452	0.13199	1
WBGene00017424	F13C5.3	Unassigned	7.77745	14.2488	-0.87347	0.24193	1
WBGene00006276	str-249	Transmembrane protein: seven transmembrane receptor: str	1.4357	2.62994	-0.87328	0.60044	1
WBGene00013385	Y62E10A.19	Unassigned	108.815	199.291	-0.873	0.075992	1
WBGene00015707	C12D5.4	Unassigned	19.0711	34.9019	-0.87192	0.065104	1
WBGene00015052	clec-52	Stress response: C-type Lectin	820.027	1499.46	-0.8707	0.014116	0.58871
WBGene00022756	nhr-251	Transcription factor: NHR	9.80599	17.9273	-0.87043	0.23601	1
WBGene00000743	col-170	Extracellular material: collagen	322.163	588.818	-0.87003	0.19692	1
WBGene00044132	C23H4.8	Unassigned	29.2016	53.3661	-0.86988	0.042543	1
WBGene00004264	qua-1	Signaling: hedgehog-like	1640.32	2996.63	-0.86936	0.12208	1
WBGene00009096	fipr-1	Stress response: pathogen: unassigned	593.358	1083.95	-0.86932	0.0035354	0.22845
WBGene00021706	srbc-39	Transmembrane protein: seven transmembrane receptor: srbc	0.641571	1.1718	-0.86905	0.88189	1
WBGene00016600	ets-5	Transcription factor: ETS	6.42934	11.7399	-0.86868	0.2678	1
WBGene00000136	amt-4	Transmembrane transport: ammonium	1366.58	2494.9	-0.86841	0.0028529	0.20125
WBGene00007563	C14A4.13	Cytoskeleton: microtubule: tau tubulin kinase	2.85515	5.21226	-0.86834	0.39269	1
WBGene00008709	F11E6.6	Transmembrane protein: unassigned	32.1568	58.6988	-0.86821	0.035484	0.93752
WBGene00008049	NA	NA	4.30709	7.86199	-0.86818	0.3747	1
WBGene00219208	B0365.9	Unassigned	107.224	195.716	-0.86813	0.19604	1
WBGene00194800	linc-83	Non-coding RNA: linc	7.73566	14.1141	-0.86754	0.20855	1
WBGene00011307	mpst-7	Metabolism: unassigned	82.8972	151.231	-0.86736	0.10026	1
WBGene00022024	Y64H9A.2	Unassigned: regulated by multiple stresses	104.7	191.005	-0.86735	0.13979	1
WBGene00010138	anoh-1	Transmembrane transport: chloride channel	15.7202	28.675	-0.86718	0.094263	1
WBGene00006456	NA	NA	49.4589	90.2086	-0.86704	0.023079	0.76323
WBGene00005972	srx-81	Pseudogene	2.4143	4.40025	-0.86598	0.53523	1
WBGene00006533	tba-7	Cytoskeleton: microtubule: tubulin	221.757	404.111	-0.86577	0.0061464	0.34403
WBGene00001992	hot-7	Transmembrane protein: unassigned	15.445	28.1439	-0.86568	0.090579	1
WBGene00200555	R153.5	Non-coding RNA: ncRNA	3.10778	5.66187	-0.86539	0.51542	1
WBGene00012168	W01A8.6	Proteolysis general: carboxypeptidase	57.5064	104.723	-0.86478	0.1383	1
WBGene00000785	cpr-5	Proteolysis general: cysteine: unassigned	3702.81	6741.06	-0.86435	0.0018881	0.14664
WBGene00007891	C33B4.2	Unassigned: regulated by multiple stresses	20.5648	37.4272	-0.86391	0.13875	1
WBGene00050904	Y70C5A.3	Unassigned: regulated by multiple stresses	59.7571	108.745	-0.86377	0.0182	0.67489
WBGene00005947	srx-56	Transmembrane protein: seven transmembrane receptor: srx	4.52405	8.22989	-0.86326	0.32689	1
WBGene00021019	W04B5.2	Pseudogene	64.271	116.911	-0.86317	0.019007	0.68981
WBGene00004230	ptr-16	Signaling: hedgehog-like	206.673	375.883	-0.86293	0.058064	1
WBGene00201301	C10F3.15	Non-coding RNA: ncRNA	2.77075	5.03821	-0.86263	0.55449	1
WBGene00020793	T25D1.1	Unassigned	3.3929	6.16782	-0.86224	0.43749	1
WBGene00195159	T04C12.14	Non-coding RNA: ncRNA	4.55972	8.28631	-0.86178	0.29564	1
WBGene00023330	R13D7.5	Pseudogene	1.11491	2.026	-0.86171	0.65807	1
WBGene00044167	C36A4.11	Unassigned	27.3245	49.6514	-0.86164	0.059858	1
WBGene00008360	nspc-19	Unassigned	90.2373	163.894	-0.86097	0.0070185	0.37263
WBGene00008902	phf-32	Unassigned	4.11568	7.4743	-0.86081	0.38476	1
WBGene00008633	fbxa-18	Proteolysis proteasome: E3: F box	12.5904	22.8643	-0.86077	0.11586	1
WBGene00021283	NA	NA	6.27123	11.3883	-0.86074	0.30757	1
WBGene00019253	H31G24.1	Unassigned	1.16683	2.11581	-0.85862	0.75713	1
WBGene00013539	Y73F8A.35	Unassigned: membrane spanning domain	41.0492	74.3526	-0.85703	0.025362	0.80416
WBGene00016909	frpr-4	Neuronal function: synaptic function: neuropeptide	19.9264	36.084	-0.85668	0.11073	1
WBGene00044227	C07A9.13	Unassigned	4.11887	7.45458	-0.85588	0.38506	1
WBGene00005513	sri-1	Transmembrane protein: seven transmembrane receptor: sri	4.93617	8.93251	-0.85567	0.53504	1
WBGene00008551	lgc-36	Transmembrane transport: extracellular ligand gated channel	4.90924	8.88207	-0.8554	0.34522	1
WBGene00011873	T20G5.12	Unassigned	3.77865	6.83642	-0.85537	0.51249	1
WBGene00005659	srr-8	Transmembrane protein: seven transmembrane receptor: srr	0.674057	1.21942	-0.85525	0.87824	1
WBGene00010764	K10H10.9	Unassigned	0.674057	1.21942	-0.85525	0.87824	1
WBGene00000190	warf-1	Trafficking: ER/Golgi: ARF	18.2865	33.0692	-0.85471	0.13355	1
WBGene00005383	srh-167	Transmembrane protein: seven transmembrane receptor: srh	1.60393	2.89992	-0.85441	0.67112	1
WBGene00006612	trf-1	Signaling: Y kinase	2.0416	3.68953	-0.85374	0.58275	1
WBGene00013974	npr-9	Neuronal function: synaptic function: neuropeptide	3.3929	6.12837	-0.85299	0.43834	1
WBGene00008282	C53D6.5	Pseudogene	0.9786	1.76757	-0.85297	0.77922	1
WBGene00020420	npr-38	Transmembrane protein: seven transmembrane receptor: unassigned	10.4345	18.8462	-0.85291	0.16544	1
WBGene00010468	K01D12.9	Unassigned: regulated by multiple stresses	227.94	411.518	-0.8523	0.24074	1
WBGene00015731	C13B7.6	Unassigned: regulated by multiple stresses	1.38378	2.49801	-0.85216	0.69387	1
WBGene00018133	F37A4.3	Protein modification: carbohydrate	26.1188	47.1133	-0.85105	0.064563	1
WBGene00004397	rol-6	Extracellular material: collagen	2117.54	3818.86	-0.85075	0.30312	1
WBGene00020750	nhr-222	Transcription factor: NHR	1.94471	3.50661	-0.85052	0.54497	1
WBGene00018473	cima-1	Transmembrane transport: solute carrier	81.9422	147.684	-0.84984	0.011247	0.50984
WBGene00020703	T22F7.4	Unassigned	213.154	384.038	-0.84935	0.081674	1
WBGene00021383	Y37F4.2	Unassigned	1.75648	3.16386	-0.849	0.71503	1
WBGene00015196	B0454.5	Transmembrane protein: unassigned	68.6312	123.611	-0.84887	0.018362	0.67881
WBGene00005670	sru-7	Transmembrane protein: seven transmembrane receptor: sru	2.51494	4.52676	-0.84796	0.529	1
WBGene00019758	M03F4.4	Unassigned	1.03051	1.85463	-0.84777	0.77303	1
WBGene00008144	gasr-8	Unassigned	6.09925	10.9755	-0.84758	0.28522	1
WBGene00194910	ZC404.15	Transmembrane protein: unassigned	5.08441	9.14868	-0.84748	0.47928	1
WBGene00044205	T13F3.8	Transmembrane protein: unassigned	7.14282	12.847	-0.84687	0.26097	1
WBGene00010413	H25K10.4	Unassigned	1.04676	1.88252	-0.84674	0.77113	1
WBGene00014132	ZK896.1	Stress response: pathogen: CUB	13.3134	23.9375	-0.84639	0.095119	1
WBGene00020640	fbxa-73	Proteolysis proteasome: E3: F box	3.24409	5.83049	-0.8458	0.40978	1
WBGene00020014	R11G11.6	Unassigned: regulated by multiple stresses	31.4431	56.4978	-0.84545	0.2664	1
WBGene00008057	irld-25	Unassigned: receptor L domain	0.320786	0.57604	-0.84456	1	1
WBGene00008699	F11D11.4	Unassigned	0.320786	0.57604	-0.84456	1	1
WBGene00015616	C08G5.3	Pseudogene	0.320786	0.57604	-0.84456	1	1
WBGene00018179	F38E1.6	Transmembrane protein: seven transmembrane receptor: unassigned	0.320786	0.57604	-0.84456	1	1
WBGene00021916	NA	Unassigned	0.320786	0.57604	-0.84456	1	1
WBGene00044141	H03G16.6	Transmembrane protein: unassigned	0.320786	0.57604	-0.84456	1	1
WBGene00044377	Y49F6B.13	Unassigned	0.320786	0.57604	-0.84456	1	1
WBGene00169263	21ur-8429	NA	0.320786	0.57604	-0.84456	1	1
WBGene00194735	Y82E9BL.19	Unassigned	0.320786	0.57604	-0.84456	1	1
WBGene00196453	F27D9.10	Non-coding RNA: ncRNA	0.320786	0.57604	-0.84456	1	1
WBGene00198975	C17H12.33	Non-coding RNA: ncRNA	0.641571	1.15208	-0.84456	0.88282	1
WBGene00200098	Y71F9AL.20	Non-coding RNA: ncRNA	0.320786	0.57604	-0.84456	1	1
WBGene00219567	linc-164	Non-coding RNA: ncRNA	0.320786	0.57604	-0.84456	1	1
WBGene00022733	tmem-17	Transmembrane protein: unassigned	4.76044	8.54757	-0.84442	0.48323	1
WBGene00044216	C47E8.10	Pseudogene	1.65266	2.96726	-0.84435	0.63991	1
WBGene00021307	NA	NA	5.36634	9.63498	-0.84434	0.34348	1
WBGene00018418	F44E2.4	Transmembrane protein: unassigned	1080.6	1940.08	-0.84429	0.13945	1
WBGene00013786	nep-24	Proteolysis general: metallopeptidase	2.53437	4.54916	-0.84397	0.46054	1
WBGene00020609	T20D4.3	Unassigned	1.62017	2.9081	-0.84393	0.66434	1
WBGene00006026	srx-135	Transmembrane protein: seven transmembrane receptor: srx	1.8084	3.24542	-0.8437	0.55048	1
WBGene00008015	fbxa-174	Proteolysis proteasome: E3: F box	1.41945	2.54563	-0.84268	0.69067	1
[truncated: 44,727 more rows]

## Sheet: Figure 6C source data
Gene_id	Gene Name	Functional Category	readcount_dbl-1(-) E. faecalis	readcount_WT E. faecalis	log2FoldChange	pval	padj
WBGene00015605	C08E3.13	Signaling: TGF beta	1.20985	53.4608	-5.4656	0.00023934	0.045277
WBGene00002102	ins-19	Metabolism: insulin	0.410215	16.5685	-5.3359	1.48e-05	0.0063439
WBGene00000936	dbl-1	Signaling: TGF beta	5.69404	198.14	-5.1209	7.1e-10	1.26e-06
WBGene00016669	ilys-2	Stress response: pathogen: unassigned	2.99438	71.8554	-4.5848	3.67e-10	7.06e-07
WBGene00009746	F46A8.3	Extracellular material: galectin	1.21176	16.1421	-3.7356	0.00025266	0.047026
WBGene00001399	fat-7	Metabolism: lipid: fatty acid	14.7568	184.597	-3.6449	3.05e-20	1.41e-16
WBGene00008905	F17B5.1	Unassigned: regulated by multiple stresses	8.23662	91.1007	-3.4673	1.34e-09	2.06e-06
WBGene00219728	linc-16	Non-coding RNA: linc	21.6303	222.741	-3.3642	1.2e-19	4.6e-16
WBGene00016553	mir-8199	Non-coding RNA: miRNA	20.9536	191.55	-3.1925	7.61e-16	2.2e-12
WBGene00219661	linc-45	Non-coding RNA: linc	4.37828	37.7088	-3.1065	1.56e-06	0.00092485
WBGene00017225	fbxa-52	Proteolysis proteasome: E3: F box	2.79598	24.0322	-3.1035	4e-05	0.013198
WBGene00010100	F55C9.3	Unassigned	8.43694	69.7672	-3.0478	4.55e-05	0.014805
WBGene00001767	gst-19	Stress response: detoxification: GST	5.05504	40.3956	-2.9984	1.51e-06	0.00091731
WBGene00008447	E01G4.5	Unassigned: regulated by multiple stresses	124.804	925.625	-2.8908	3.36e-21	2.58e-17
WBGene00019746	M03A1.3	Stress response: unassigned	3.88104	27.9422	-2.8479	6.93e-05	0.019506
WBGene00007963	cyp-25A1	Stress response: detoxification: CYP	19.4526	138.357	-2.8304	2.94e-12	6.16e-09
WBGene00015398	tag-293	Transmembrane protein: seven transmembrane receptor: unassigned	4.49925	30.1558	-2.7447	0.00011041	0.027108
WBGene00008584	irg-4	Stress response: pathogen: CUB	192.213	1286.24	-2.7424	6.83e-21	3.94e-17
WBGene00019029	F58B6.1	Unassigned	10.1063	65.9788	-2.7068	1.35e-07	0.00011989
WBGene00015503	C06A5.5	NA	6.28187	39.924	-2.668	3.19e-05	0.010874
WBGene00009750	F46A8.7	Unassigned: regulated by multiple stresses	26.9692	167.815	-2.6375	8.53e-10	1.41e-06
WBGene00013007	Y48E1B.8	Transmembrane protein: unassigned	25.4224	144.563	-2.5075	1.62e-08	1.87e-05
WBGene00013101	Y51H4A.5	Unassigned: regulated by multiple stresses	12.8793	73.089	-2.5046	1.79e-05	0.0072977
WBGene00219688	linc-21	Non-coding RNA: linc	17.0991	84.5354	-2.3056	1.95e-07	0.00015517
WBGene00013816	Y116F11A.1	DNA: helicase	12.3842	58.6137	-2.2427	9.81e-05	0.025435
WBGene00020992	W03F8.2	Pseudogene	17.3919	69.8672	-2.0062	1.01e-05	0.0046662
WBGene00008593	clec-227	Stress response: C-type Lectin	15.1213	56.8708	-1.9111	7.31e-05	0.020324
WBGene00077757	E02H4.7	Unassigned	56.0849	204.073	-1.8634	0.00013526	0.030091
WBGene00219304	F56D6.16	Pseudogene	89.1059	314.985	-1.8217	1.99e-08	2.19e-05
WBGene00077772	T02G6.10	Pseudogene	33.2376	116.688	-1.8118	1.04e-05	0.0047032
WBGene00022665	ZK154.1	Unassigned	88.2934	295.685	-1.7437	3.54e-07	0.00024788
WBGene00185076	Y7A9A.79	Non-coding RNA: ncRNA	23.4527	76.0144	-1.6965	9.27e-05	0.024346
WBGene00001500	ftn-1	Metabolism: mitochondria: unassigned	94.322	303.762	-1.6873	0.00021972	0.04233
WBGene00003876	pept-2	Transmembrane transport: amino acid	755.722	2341.92	-1.6318	2.36e-09	3.4e-06
WBGene00008462	E02H4.4	Unassigned	25.099	77.7293	-1.6308	0.00024929	0.046775
WBGene00014505	T05E11.9	Non-coding RNA: ncRNA	1726.59	5247.63	-1.6037	0.0001369	0.030091
WBGene00001077	dpy-18	Extracellular material: PGI	881.448	2643.86	-1.5847	0.00011837	0.028237
WBGene00013073	hmit-1.1	Transmembrane transport: lipid	58.2835	172.434	-1.5649	8.77e-05	0.023997
WBGene00044213	Y102A5C.36	Unassigned	71.4657	210.087	-1.5557	1.65e-06	0.00092626
WBGene00014089	ZK822.1	Unassigned: regulated by multiple stresses	41.801	119.204	-1.5118	2.94e-05	0.010448
WBGene00020537	fbxb-37	Proteolysis proteasome: E3: F box	46.6785	128.951	-1.466	5.5e-05	0.016778
WBGene00014472	MTCE.33	Metabolism: mitochondria: ribosome	845.315	2309.47	-1.45	0.00011367	0.027614
WBGene00017881	asp-13	Proteolysis general: aspartate: cathepsin	1909.22	5163.9	-1.4355	5.82e-08	5.6e-05
WBGene00006927	vit-3	Metabolism: lipid: binding	6961.62	18364.5	-1.3994	2.23e-07	0.00017133
WBGene00018566	F47E1.2	Transmembrane transport: solute carrier	51.2869	133.947	-1.385	0.00017495	0.036375
WBGene00044728	Y53F4B.45	Non-coding RNA: ncRNA	2063.09	5273.28	-1.3539	5.93e-07	0.00038024
WBGene00015613	C08F1.10	Transmembrane protein: unassigned	86.137	214.639	-1.3172	0.00011868	0.028237
WBGene00012139	T28F4.4	Unassigned	273.235	679.58	-1.3145	3.83e-06	0.0019206
WBGene00016635	C44B11.6	Unassigned	69.6284	172.759	-1.311	0.00010111	0.025643
WBGene00010507	K02E2.6	Proteolysis general: aspartate: unassigned	65.3163	161.455	-1.3056	0.00019664	0.039463
WBGene00008341	ttr-44	Unassigned: regulated by multiple stresses	258.376	626.85	-1.2787	3.77e-06	0.0019206
WBGene00008538	sqrd-1	Stress response: unassigned	78.8044	191.07	-1.2778	6.03e-05	0.017603
WBGene00219707	linc-8	Non-coding RNA: linc	92.3665	218.582	-1.2427	0.00013091	0.030008
WBGene00010212	fbxa-192	Proteolysis proteasome: E3: F box	309.934	713.192	-1.2023	3.27e-05	0.010928
WBGene00014954	Y102A5C.5	Pseudogene	221.198	502.614	-1.1841	3.17e-05	0.010874
WBGene00006929	vit-5	Metabolism: lipid: binding	164300	364476	-1.1495	2.29e-05	0.0086495
WBGene00003958	pcp-3	Proteolysis general: serine	577.724	1268.94	-1.1352	2.78e-05	0.010033
WBGene00006561	tcl-2	Development: somatic	164.528	354.705	-1.1083	0.00026142	0.047883
WBGene00021576	fbxc-51	Proteolysis proteasome: E3: F box	292.188	629.426	-1.1071	0.00020948	0.041677
WBGene00019400	K04G7.1	Development: somatic	1649.38	3534	-1.0994	5.67e-05	0.016778
WBGene00004987	spp-2	Stress response: pathogen: saposin	596.692	1262.48	-1.0812	0.00021709	0.04233
WBGene00007071	AC3.5	Proteolysis general: unassigned	3549.41	1834.24	0.95239	0.00017762	0.036602
WBGene00045261	H29C22.1	Unassigned: regulated by multiple stresses	1781.21	903.09	0.97991	0.00018274	0.037323
WBGene00001390	far-6	Metabolism: lipid: binding	2659.85	1337.66	0.99163	0.00017202	0.036091
WBGene00009340	best-14	Transmembrane transport: chloride channel	1523.38	748.702	1.0248	0.0001474	0.031793
WBGene00011892	erh-1	Unassigned	1998.79	973.899	1.0373	0.00013262	0.030008
WBGene00011891	del-6	Transmembrane transport: acid sensing	2195.36	1056.35	1.0554	5.53e-05	0.016778
WBGene00010007	F53H4.2	Unassigned	3435.6	1624.03	1.081	0.00025755	0.047551
WBGene00013391	Y62H9A.3	Unassigned	3602.03	1675.83	1.1039	5.62e-05	0.016778
WBGene00012783	Y43C5A.3	Stress response: pathogen: unassigned	659.524	305.113	1.1121	0.00010376	0.02603
WBGene00007070	ugt-49	Stress response: detoxification: ugt	974.171	443.28	1.136	3.2e-05	0.010874
WBGene00018971	clec-67	Stress response: C-type Lectin	902.447	409.594	1.1396	2.12e-05	0.0084422
WBGene00021518	hpo-6	Stress response: pathogen: unassigned	1231.68	558.2	1.1418	1.4e-05	0.0060903
WBGene00077701	poml-3	Stress response: unassigned	274.378	120.185	1.1909	0.00013672	0.030091
WBGene00015780	C14F11.4	Unassigned: regulated by multiple stresses	726.86	318.24	1.1916	9.98e-05	0.025604
WBGene00022821	ZK813.2	Unassigned: regulated by multiple stresses	3643.11	1564.03	1.2199	4.36e-06	0.0021411
WBGene00003065	lpd-9	Transmembrane protein: unassigned	3805.23	1623.38	1.229	5.78e-06	0.0027777
WBGene00235164	K09F6.13	Unassigned	249.254	105.49	1.2405	5.65e-05	0.016778
WBGene00013579	Y79H2A.2	Transmembrane protein: unassigned	166.765	68.5327	1.283	0.0002201	0.04233
WBGene00009058	F22E12.1	Proteolysis general: serine	1451.27	595.845	1.2843	1.61e-06	0.00092626
WBGene00010628	ceeh-2	Metabolism: lipid: epoxide hydrolase	328.007	133.784	1.2938	0.00021818	0.04233
WBGene00000298	cat-4	Neuronal function: synaptic function: neurotransmitter metabolism	1992.13	798.676	1.3186	1.69e-06	0.00092718
WBGene00019592	K09F6.9	Unassigned: regulated by multiple stresses	772.007	308.686	1.3225	2.87e-06	0.0015051
WBGene00009778	F46C5.1	Unassigned: membrane spanning domain	167.208	66.1199	1.3385	6.52e-05	0.018817
WBGene00003090	lys-1	Stress response: pathogen: lysozyme	12041	4723.18	1.3501	4.62e-07	0.00031334
WBGene00010613	K07A1.6	Proteolysis general: inhibitor: TIL domain	630.168	244.105	1.3682	2.09e-06	0.0011217
WBGene00008393	D1086.6	Unassigned: regulated by multiple stresses	1488.98	568.508	1.3891	5.86e-07	0.00038024
WBGene00010085	F55B11.3	Unassigned	1842.85	702.116	1.3922	2.69e-07	0.00019376
WBGene00010630	ttll-15	Cytoskeleton: microtubule: tubulin modification	146.729	55.6442	1.3989	0.00010883	0.027007
WBGene00020763	ztf-18	Nucleic acid: binding: zinc finger	1537.01	570.43	1.43	1.92e-07	0.00015517
WBGene00012530	Y32F6A.5	Proteolysis general: carboxypeptidase	7286	2697.53	1.4335	3.72e-08	3.73e-05
WBGene00018052	F35F10.1	Unassigned	110.785	40.317	1.4583	0.00019168	0.038804
WBGene00011262	pho-8	Lysosome: acid phosphatase	175.143	60.4708	1.5342	4.75e-05	0.015006
WBGene00007947	C35A5.3	Transmembrane transport: solute carrier	1062.8	366.346	1.5366	3.64e-08	3.73e-05
WBGene00003091	lys-2	Proteolysis general: lysozyme	6670.26	2222.62	1.5855	2.83e-09	3.84e-06
WBGene00017485	F15E6.4	Unassigned: regulated by multiple stresses	380.5	125.122	1.6046	6.88e-05	0.019506
WBGene00013900	ugt-18	Stress response: detoxification: ugt	185.208	57.3525	1.6912	0.00013062	0.030008
WBGene00015433	C04E12.2	Unassigned: regulated by multiple stresses	165.771	50.3063	1.7204	0.0001642	0.034767
WBGene00023417	swm-1	Proteolysis general: inhibitor: TIL domain	245.655	73.6336	1.7382	2.58e-07	0.00019196
WBGene00219267	mir-5548	Non-coding RNA: miRNA	102.363	28.7887	1.8301	2.44e-05	0.0090964
WBGene00019593	K09F6.10	Unassigned: regulated by multiple stresses	544.312	150.689	1.8529	1.8e-05	0.0072977
WBGene00020616	T20D4.10	Unassigned: regulated by multiple stresses	73.5606	19.8648	1.8887	0.00012088	0.028467
WBGene00010659	K08D8.5	Stress response: pathogen: CUB	394.554	100.367	1.9749	1.5e-07	0.00012818
WBGene00003434	msp-38	Major sperm protein	62.0291	14.6415	2.0829	9.28e-05	0.024346
WBGene00015933	C17H12.8	Unassigned: regulated by multiple stresses	3256.21	720.338	2.1764	4.68e-05	0.015006
WBGene00007829	oac-5	Metabolism: lipid: o-acyl transferase	41.4742	9.1649	2.178	0.00013224	0.030008
WBGene00020661	smz-2	Development: germline	62.1708	10.2992	2.5937	6.16e-07	0.00038449
WBGene00019576	lido-5	Unassigned: regulated by multiple stresses	94.5328	15.5488	2.604	5.19e-09	6.65e-06
WBGene00003438	msp-45	Major sperm protein	107.944	16.7705	2.6863	8.84e-05	0.023997
WBGene00015348	C02F5.5	Unassigned: regulated by multiple stresses	34.0392	4.5694	2.8971	2.27e-05	0.0086495
WBGene00003452	msp-59	Major sperm protein	115.852	14.9096	2.958	8.98e-05	0.024096
WBGene00018548	clec-79	Stress response: C-type Lectin	34.0052	4.22931	3.0073	0.00026946	0.048967
WBGene00021585	clec-74	Stress response: C-type Lectin	34.6741	4.19585	3.0468	2.26e-05	0.0086495
WBGene00000256	bli-6	Extracellular material: collagen	132.521	12.7274	3.3802	0.00022483	0.042883
WBGene00009429	irg-5	Stress response: pathogen: unassigned	3716.4	325.268	3.5142	5.03e-18	1.66e-14
WBGene00000748	col-175	Extracellular material: collagen	87.2495	7.57088	3.5266	1.72e-05	0.0072251
WBGene00016839	C50F2.5	Signaling: phosphatase: Y	16.6831	0.887218	4.233	0.00015294	0.032682
WBGene00007763	C27B7.6	Signaling: phosphatase: unassigned	21.9158	1.1272	4.2812	1.22e-05	0.0054046
WBGene00014247	ZK1307.4	Unassigned: regulated by multiple stresses	19.2957	0.887218	4.4428	2.6e-05	0.0095201
WBGene00045238	rpr-1	Non-coding RNA: ncRNA	1559.88	49.9789	4.964	1.59e-08	1.87e-05
WBGene00009605	F40G12.10	Signaling: phosphatase: Y	27.262	0.613783	5.473	6e-06	0.0028275
WBGene00017325	F10C1.3	Unassigned: regulated by multiple stresses	13.1896	0.273435	5.5921	0.00014207	0.030932
WBGene00007729	clec-185	Stress response: C-type Lectin	577.128	6.85699	6.3952	2.26e-55	5.21e-51
WBGene00005065	sra-39	Transmembrane protein: seven transmembrane receptor: sra	124.281	1.05398	6.8816	5.9e-25	6.81e-21
WBGene00005064	sra-38	Transmembrane protein: seven transmembrane receptor: sra	35.3925	0	Inf	8.8e-13	2.03e-09
WBGene00018911	F56A4.3	Stress response: detoxification: GST	0	125.886	NA	1.01e-07	9.37e-05
WBGene00022292	Y75D11A.3	Unassigned: regulated by multiple stresses	0	285.698	NA	9.57e-16	2.45e-12
