# Supplementary material for: The DBL-1/TGF-β signaling pathway tailors behavioral and molecular host responses to a variety of bacteria in Caenorhabditis elegans
Source: eLife. 2023 Sep 26;12:e75831. doi: 10.7554/eLife.75831 (PMC10567113; doi:10.7554/eLife.75831)
Supplement: Figure 7—source data 1. [file elife-75831-fig7-data1.xlsx]

## Sheet: dod-22
Tukey's multiple comparisons test	Mean 1	Mean 2	Mean diff.	SE of diff.	N1	N2	95.00% CI of diff.	Adjusted P Value
E. coli OP50:WT vs. E. coli OP50:dbl-1(-)	11.52	11.67	-0.1495	2.332	30	32	-7.280 to 6.981	>0.9999
E. coli OP50:WT vs. E. cloacae:WT	11.52	25.84	-14.32	2.332	30	32	-21.45 to -7.189	<0.0001
E. coli OP50:WT vs. K. oxytoca:WT	11.52	29.88	-18.36	2.315	30	33	-25.44 to -11.28	<0.0001
E. coli OP50:WT vs. S. marcescens:WT	11.52	24.01	-12.49	2.412	30	28	-19.86 to -5.117	<0.0001
E. coli OP50:dbl-1(-) vs. E. cloacae:dbl-1(-)	11.67	16.28	-4.607	2.26	32	34	-11.52 to 2.304	0.4585
E. coli OP50:dbl-1(-) vs. K. oxytoca:dbl-1(-)	11.67	16.36	-4.692	2.294	32	32	-11.71 to 2.323	0.454
E. coli OP50:dbl-1(-) vs. S. marcescens:dbl-1(-)	11.67	17.19	-5.515	2.277	32	33	-12.48 to 1.446	0.2354
E. cloacae:WT vs. E. cloacae:dbl-1(-)	25.84	16.28	9.563	2.26	32	34	2.653 to 16.47	0.0009
K. oxytoca:WT vs. K. oxytoca:dbl-1(-)	29.88	16.36	13.52	2.277	33	32	6.560 to 20.48	<0.0001
S. marcescens:WT vs. S. marcescens:dbl-1(-)	24.01	17.19	6.826	2.358	28	33	-0.3836 to 14.03	0.0781
E. coli OP50:WT vs. E. coli OP50:dbl-1(-)	19.12	23.02	-3.9	1.573	32	33	-8.709 to 0.9084	0.2091
E. coli OP50:WT vs. B. megaterium:WT	19.12	14.86	4.258	1.625	32	29	-0.7112 to 9.227	0.1538
E. coli OP50:WT vs. E. faecalis:WT	19.12	19.54	-0.4134	1.611	32	30	-5.339 to 4.512	>0.9999
E. coli OP50:WT vs. S. epidermidis:WT	19.12	16.43	2.69	1.585	32	32	-2.156 to 7.535	0.6891
E. coli OP50:dbl-1(-) vs. B. megaterium:dbl-1(-)	23.02	11.82	11.2	1.573	33	32	6.393 to 16.01	<0.0001
E. coli OP50:dbl-1(-) vs. E. faecalis:dbl-1(-)	23.02	18.72	4.299	1.573	33	32	-0.5100 to 9.107	0.1177
E. coli OP50:dbl-1(-) vs. S. epidermidis:dbl-1(-)	23.02	17.93	5.096	1.586	33	31	0.2478 to 9.944	0.0316
B. megaterium:WT vs. B. megaterium:dbl-1(-)	14.86	11.82	3.043	1.625	29	32	-1.926 to 8.012	0.5713
E. faecalis:WT vs. E. faecalis:dbl-1(-)	19.54	18.72	0.8119	1.611	30	32	-4.114 to 5.738	0.9996
S. epidermidis:WT vs. S. epidermidis:dbl-1(-)	16.43	17.93	-1.494	1.598	32	31	-6.379 to 3.390	0.9823

## Sheet: F55G11.7
Tukey's multiple comparisons test	Mean 1	Mean 2	Mean diff.	SE of diff.	N1	N2	95.00% CI of diff.	Adjusted P Value
E. coli OP50:WT vs. E. coli OP50:dbl-1(-)	22.67	16.5	6.17	1.497	31	31	1.588 to 10.75	0.0014
E. cloacae:WT vs. E. cloacae:dbl-1(-)	26.08	11.54	14.54	1.701	30	20	9.329 to 19.75	<0.0001
K. oxytoca:WT vs. K. oxytoca:dbl-1(-)	23.43	15.05	8.38	1.645	23	29	3.342 to 13.42	<0.0001
S. marcescens:WT vs. S. marcescens:dbl-1(-)	24.1	8.113	15.99	1.626	29	24	11.01 to 20.97	<0.0001
E. coli OP50:WT vs. E. cloacae:WT	22.67	26.08	-3.415	1.509	31	30	-8.035 to 1.206	0.3194
E. coli OP50:WT vs. K. oxytoca:WT	22.67	23.43	-0.7623	1.622	31	23	-5.728 to 4.203	0.9998
E. coli OP50:WT vs. S. marcescens:WT	22.67	24.1	-1.435	1.522	31	29	-6.096 to 3.226	0.9814
E. coli OP50:dbl-1(-) vs. E. cloacae:dbl-1(-)	16.5	11.54	4.952	1.69	31	20	-0.2225 to 10.13	0.0718
E. coli OP50:dbl-1(-) vs. K. oxytoca:dbl-1(-)	16.5	15.05	1.447	1.522	31	29	-3.214 to 6.108	0.9805
E. coli OP50:dbl-1(-) vs. S. marcescens:dbl-1(-)	16.5	8.113	8.383	1.602	31	24	3.477 to 13.29	<0.0001
E. coli OP50:WT vs. E. coli OP50:dbl-1(-)	22.67	16.5	6.17	1.164	31	31	2.604 to 9.737	<0.0001
B. megaterium:WT vs. B. megaterium:dbl-1(-)	10.75	7.075	3.675	1.395	25	19	-0.5981 to 7.948	0.1499
E. faecalis:WT vs. E. faecalis:dbl-1(-)	15.07	15.17	-0.1063	1.178	28	33	-3.714 to 3.501	>0.9999
S. epidermidis:WT vs. S. epidermidis:dbl-1(-)	16.79	9.599	7.195	1.492	29	14	2.626 to 11.76	<0.0001
E. coli OP50:WT vs. B. megaterium:WT	22.67	10.75	11.92	1.232	31	25	8.141 to 15.69	<0.0001
E. coli OP50:WT vs. E. faecalis:WT	22.67	15.07	7.599	1.195	31	28	3.939 to 11.26	<0.0001
E. coli OP50:WT vs. S. epidermidis:WT	22.67	16.79	5.871	1.184	31	29	2.244 to 9.498	<0.0001
E. coli OP50:dbl-1(-) vs. B. megaterium:dbl-1(-)	16.5	7.075	9.42	1.336	31	19	5.329 to 13.51	<0.0001
E. coli OP50:dbl-1(-) vs. E. faecalis:dbl-1(-)	16.5	15.17	1.322	1.147	31	33	-2.189 to 4.834	0.9438
E. coli OP50:dbl-1(-) vs. S. epidermidis:dbl-1(-)	16.5	9.599	6.896	1.476	31	14	2.375 to 11.42	0.0001

## Sheet: irg-4
Tukey's multiple comparisons test	Mean 1	Mean 2	Mean diff.	SE of diff.	N1	N2	95.00% CI of diff.	Adjusted P Value
E. coli OP50:WT vs. E. coli OP50:dbl-1(-)	16.14	13.96	2.184	0.7523	31	32	-0.1161 to 4.484	0.0764
E. coli OP50:WT vs. E. cloacae:WT	16.14	14.55	1.594	0.7582	31	31	-0.7245 to 3.912	0.4167
E. coli OP50:WT vs. K. oxytoca:WT	16.14	16.68	-0.5368	0.7582	31	31	-2.855 to 1.781	0.9967
E. coli OP50:WT vs. S. marcescens:WT	16.14	18.46	-2.324	0.7523	31	32	-4.624 to -0.02419	0.0456
E. coli OP50:dbl-1(-) vs. E. cloacae:dbl-1(-)	13.96	14.93	-0.9699	0.7523	32	31	-3.270 to 1.330	0.9022
E. coli OP50:dbl-1(-) vs. K. oxytoca:dbl-1(-)	13.96	12.94	1.016	0.7463	32	32	-1.266 to 3.297	0.8739
E. coli OP50:dbl-1(-) vs. S. marcescens:dbl-1(-)	13.96	10.77	3.187	0.7352	32	34	0.9397 to 5.435	0.0006
E. cloacae:WT vs. E. cloacae:dbl-1(-)	14.55	14.93	-0.3797	0.7582	31	31	-2.698 to 1.938	0.9997
K. oxytoca:WT vs. K. oxytoca:dbl-1(-)	16.68	12.94	3.736	0.7523	31	32	1.436 to 6.036	<0.0001
S. marcescens:WT vs. S. marcescens:dbl-1(-)	18.46	10.77	7.695	0.7352	32	34	5.448 to 9.943	<0.0001
E. coli OP50:WT vs. E. coli OP50:dbl-1(-)	16.14	13.96	2.184	0.7712	31	32	-0.1741 to 4.542	0.092
E. coli OP50:WT vs. B. megaterium:WT	16.14	13.01	3.133	0.7773	31	31	0.7564 to 5.509	0.0019
E. coli OP50:WT vs. E. faecalis:WT	16.14	14	2.142	0.7773	31	31	-0.2349 to 4.518	0.1115
E. coli OP50:WT vs. S. epidermidis:WT	16.14	18.33	-2.186	0.7838	31	30	-4.583 to 0.2099	0.1024
E. coli OP50:dbl-1(-) vs. B. megaterium:dbl-1(-)	13.96	9.425	4.532	0.7593	32	33	2.210 to 6.853	<0.0001
E. coli OP50:dbl-1(-) vs. E. faecalis:dbl-1(-)	13.96	14.25	-0.2906	0.7651	32	32	-2.630 to 2.048	>0.9999
E. coli OP50:dbl-1(-) vs. S. epidermidis:dbl-1(-)	13.96	12.57	1.382	0.7593	32	33	-0.9393 to 3.703	0.6069
B. megaterium:WT vs. B. megaterium:dbl-1(-)	13.01	9.425	3.583	0.7655	31	33	1.242 to 5.923	0.0001
E. faecalis:WT vs. E. faecalis:dbl-1(-)	14	14.25	-0.2485	0.7712	31	32	-2.606 to 2.109	>0.9999
S. epidermidis:WT vs. S. epidermidis:dbl-1(-)	18.33	12.57	5.752	0.772	30	33	3.392 to 8.112	<0.0001

## Sheet: dod-24
Tukey's multiple comparisons test	Mean 1	Mean 2	Mean diff.	SE of diff.	N1	N2	95.00% CI of diff.	Adjusted P Value
E. coli OP50:WT vs. E. coli OP50:dbl-1(-)	61.87	3.155	58.72	1.708	31	27	53.49 to 63.95	<0.0001
E. cloacae:WT vs. E. cloacae:dbl-1(-)	67.58	3.03	64.55	1.719	28	29	59.29 to 69.81	<0.0001
K. oxytoca:WT vs. K. oxytoca:dbl-1(-)	57.74	3.096	54.64	1.752	24	32	49.28 to 60.01	<0.0001
S. marcescens:WT vs. S. marcescens:dbl-1(-)	77.19	3.849	73.34	1.705	28	30	68.12 to 78.55	<0.0001
E. coli OP50:WT vs. E. cloacae:WT	61.87	67.58	-5.703	1.692	31	28	-10.88 to -0.5259	0.0196
E. coli OP50:WT vs. K. oxytoca:WT	61.87	57.74	4.134	1.764	31	24	-1.264 to 9.533	0.2751
E. coli OP50:WT vs. S. marcescens:WT	61.87	77.19	-15.31	1.692	31	28	-20.49 to -10.13	<0.0001
E. coli OP50:dbl-1(-) vs. E. cloacae:dbl-1(-)	3.155	3.03	0.1255	1.735	27	29	-5.185 to 5.436	>0.9999
E. coli OP50:dbl-1(-) vs. K. oxytoca:dbl-1(-)	3.155	3.096	0.05894	1.696	27	32	-5.130 to 5.248	>0.9999
E. coli OP50:dbl-1(-) vs. S. marcescens:dbl-1(-)	3.155	3.849	-0.6941	1.721	27	30	-5.961 to 4.573	>0.9999
E. coli OP50:WT vs. E. coli OP50:dbl-1(-)	49.17	7.667	41.5	0.8891	32	32	38.78 to 44.22	<0.0001
B. megaterium:WT vs. B. megaterium:dbl-1(-)	9.622	3.456	6.166	0.939	26	32	3.295 to 9.037	<0.0001
E. faecalis:WT vs. E. faecalis:dbl-1(-)	28.14	6.337	21.8	0.8832	31	34	19.10 to 24.50	<0.0001
S. epidermidis:WT vs. S. epidermidis:dbl-1(-)	24.06	5.999	18.06	0.8962	31	32	15.32 to 20.80	<0.0001
E. coli OP50:WT vs. B. megaterium:WT	49.17	9.622	39.54	0.939	32	26	36.67 to 42.41	<0.0001
E. coli OP50:WT vs. E. faecalis:WT	49.17	28.14	21.03	0.8962	32	31	18.29 to 23.77	<0.0001
E. coli OP50:WT vs. S. epidermidis:WT	49.17	24.06	25.1	0.8962	32	31	22.36 to 27.84	<0.0001
E. coli OP50:dbl-1(-) vs. B. megaterium:dbl-1(-)	7.667	3.456	4.211	0.8891	32	32	1.492 to 6.929	0.0001
E. coli OP50:dbl-1(-) vs. E. faecalis:dbl-1(-)	7.667	6.337	1.33	0.8759	32	34	-1.349 to 4.008	0.7973
E. coli OP50:dbl-1(-) vs. S. epidermidis:dbl-1(-)	7.667	5.999	1.668	0.8891	32	32	-1.051 to 4.386	0.5691

## Sheet: ilys-3
Tukey's multiple comparisons test	Mean 1	Mean 2	Mean diff.	SE of diff.	N1	N2	95.00% CI of diff.	Adjusted P Value
E. coli OP50:WT vs. E. coli OP50:dbl-1(-)	13.35	12.34	1.011	1.485	27	29	-3.537 to 5.559	0.9974
E. cloacae:WT vs. E. cloacae:dbl-1(-)	9.749	11.35	-1.6	1.644	21	25	-6.634 to 3.433	0.9777
K. oxytoca:WT vs. K. oxytoca:dbl-1(-)	8.003	8.707	-0.704	1.563	28	23	-5.489 to 4.081	0.9998
S. marcescens:WT vs. S. marcescens:dbl-1(-)	6.37	12.73	-6.356	1.401	30	33	-10.65 to -2.066	0.0003
E. coli OP50:WT vs. E. cloacae:WT	13.35	9.749	3.603	1.616	27	21	-1.345 to 8.550	0.3385
E. coli OP50:WT vs. K. oxytoca:WT	13.35	8.003	5.349	1.498	27	28	0.7620 to 9.935	0.0103
E. coli OP50:WT vs. S. marcescens:WT	13.35	6.37	6.981	1.473	27	30	2.470 to 11.49	0.0001
E. coli OP50:dbl-1(-) vs. E. cloacae:dbl-1(-)	12.34	11.35	0.9912	1.516	29	25	-3.650 to 5.632	0.998
E. coli OP50:dbl-1(-) vs. K. oxytoca:dbl-1(-)	12.34	8.707	3.633	1.551	29	23	-1.115 to 8.382	0.2755
E. coli OP50:dbl-1(-) vs. S. marcescens:dbl-1(-)	12.34	12.73	-0.3864	1.414	29	33	-4.715 to 3.942	>0.9999
E. coli OP50:WT vs. E. coli OP50:dbl-1(-)	9.457	11.43	-1.977	3.353	27	32	-12.24 to 8.283	0.999
B. megaterium:WT vs. B. megaterium:dbl-1(-)	29.12	12.55	16.58	3.556	23	30	5.697 to 27.46	0.0001
E. faecalis:WT vs. E. faecalis:dbl-1(-)	22.02	23.85	-1.835	3.286	31	30	-11.89 to 8.220	0.9993
S. epidermidis:WT vs. S. epidermidis:dbl-1(-)	32	13.45	18.55	3.388	32	26	8.187 to 28.92	<0.0001
E. coli OP50:WT vs. B. megaterium:WT	9.457	29.12	-19.67	3.641	27	23	-30.81 to -8.527	<0.0001
E. coli OP50:WT vs. E. faecalis:WT	9.457	22.02	-12.56	3.377	27	31	-22.89 to -2.225	0.0061
E. coli OP50:WT vs. S. epidermidis:WT	9.457	32	-22.54	3.353	27	32	-32.80 to -12.28	<0.0001
E. coli OP50:dbl-1(-) vs. B. megaterium:dbl-1(-)	11.43	12.55	-1.112	3.261	32	30	-11.09 to 8.865	>0.9999
E. coli OP50:dbl-1(-) vs. E. faecalis:dbl-1(-)	11.43	23.85	-12.42	3.261	32	30	-22.39 to -2.440	0.0044
E. coli OP50:dbl-1(-) vs. S. epidermidis:dbl-1(-)	11.43	13.45	-2.014	3.388	32	26	-12.38 to 8.352	0.9989
