# Supplementary material for: The DBL-1/TGF-β signaling pathway tailors behavioral and molecular host responses to a variety of bacteria in Caenorhabditis elegans
Source: eLife journal article supplement (doi:10.7554/elife.75831), 2023-09-26

A. WT, *S. marcescens* vs. control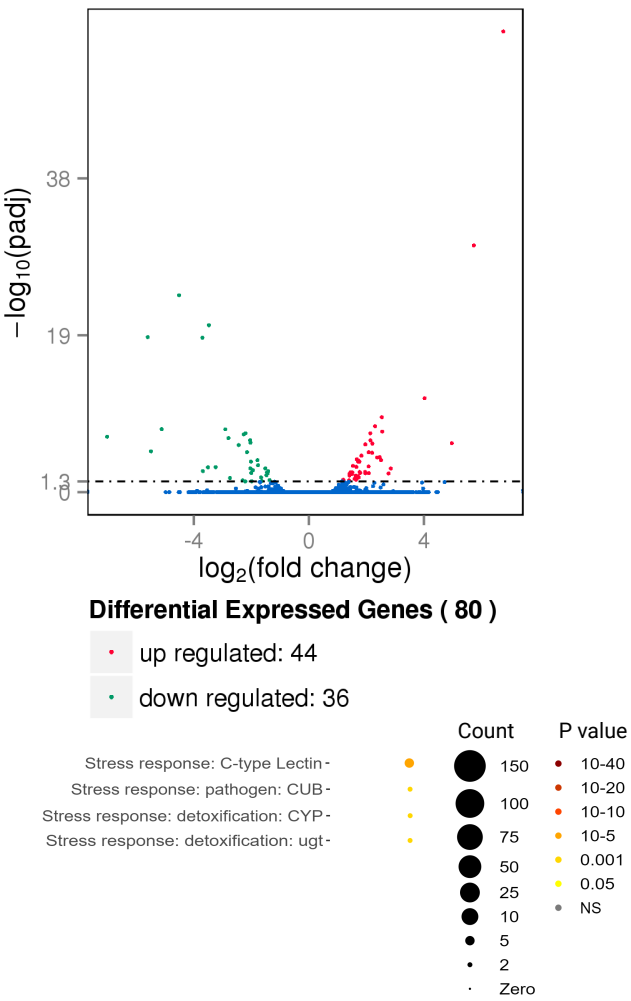B. *dbl-1(-)*, *Sm* vs. control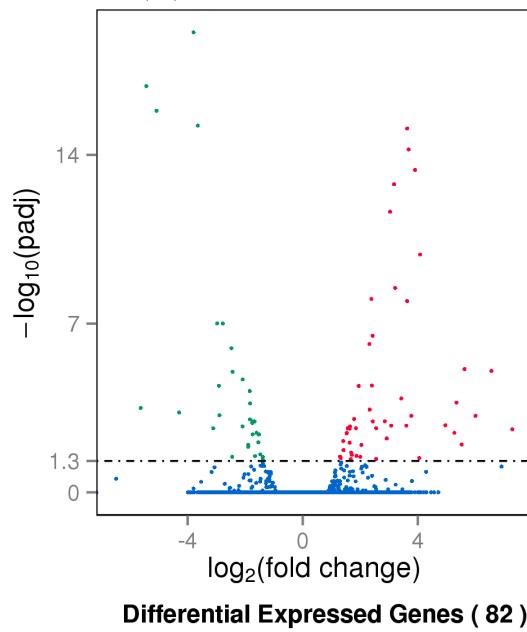C. WT vs. *dbl-1(-)*, *Sm*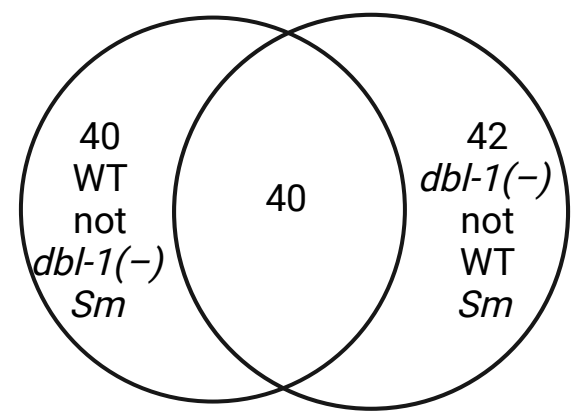D. WT, *E. faecalis* vs. control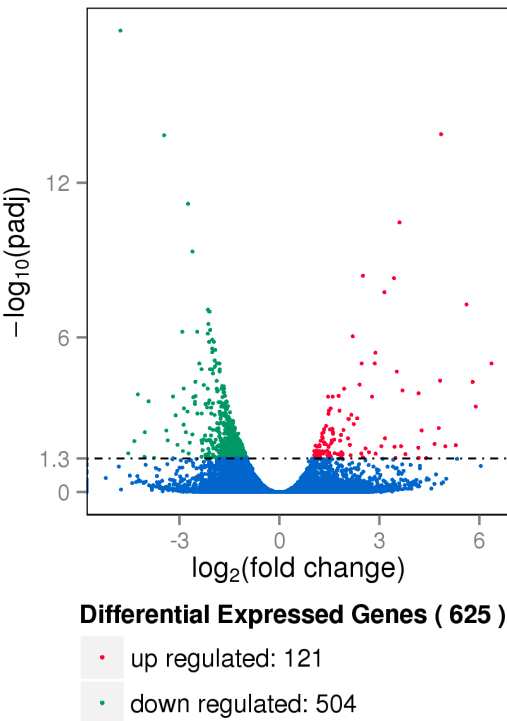E. *dbl-1(-)*, *Ef* vs. control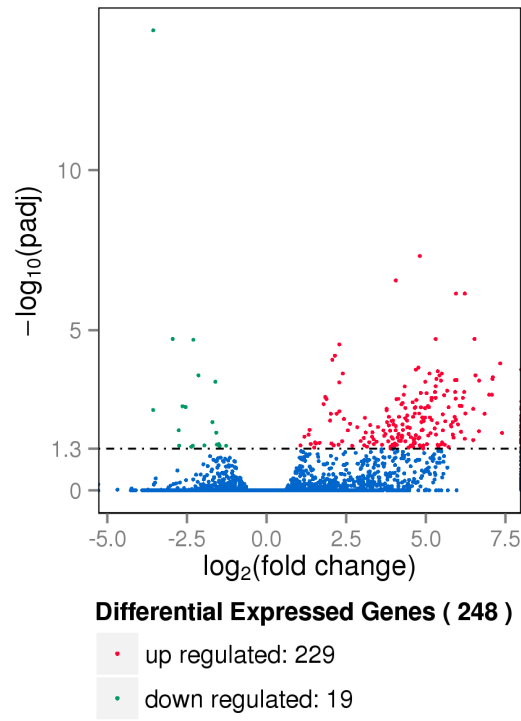F. WT vs. *dbl-1(-)*, *Ef*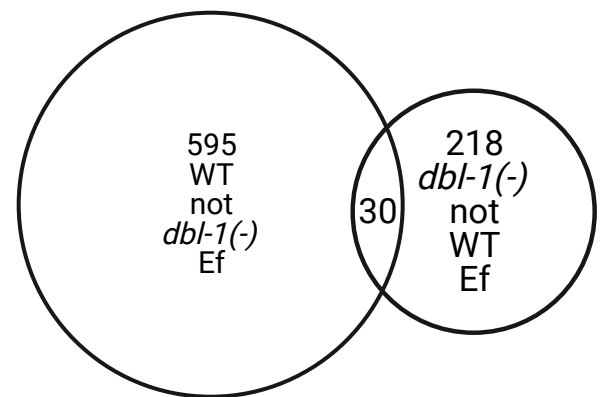G. WT, *Sm* vs. *Ef*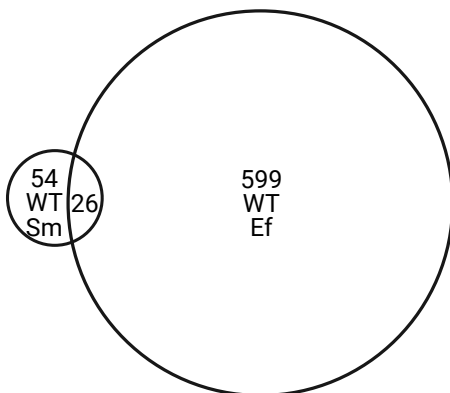H. *dbl-1(-)*, *Sm* vs. *Ef*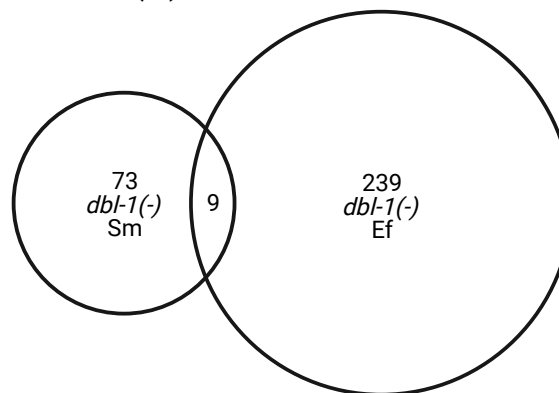

Supplement: supp [file elife_poa_e75831_Figure_6_figure_supplement_1.pdf › elife_poa_e75831_Figure_6_figure_supplement_1.pdf]
