# Supplementary material for: The DBL-1/TGF-β signaling pathway tailors behavioral and molecular host responses to a variety of bacteria in Caenorhabditis elegans
Source: eLife. 2023 Sep 26;12:e75831. doi: 10.7554/eLife.75831 (PMC10567113; doi:10.7554/eLife.75831)
Supplement: Supplementary file 2. [file elife-75831-supp2.xlsx]

## Sheet: Supplementary file 2
A. Fraction of animals with detectable RAD-SMAD fluorescence in dbl-1(-) background in response to control and Gram-negative test bacteria
Bacteria	Strain background	% animals with detectable fluorescence
		Trial 1	Trial 2	Trial 3
E. coli OP50	dbl-1(-)	0	0.05	0.21
	n	20	20	14
E. cloacae	dbl-1(-)	0.2	0.93	0.5
	n	20	15	16
K. oxytoca	dbl-1(-)	0.1	0.8	0.56
	n	20	15	16
S. marcescens	dbl-1(-)	0.1	0.15	0.15
	n	20	20	13
B. Fraction of animals with detectable RAD-SMAD fluorescence in the dbl-1(-) background in response to control and Gram-positive test bacteria
Bacteria	Strain background	% animals with detectable fluorescence
		Trial 1	Trial 2	Trial 3
E. coli OP50	dbl-1(-)	0	0.05	0.21
	n	20	20	14
B. megaterium	dbl-1(-)	0	0	0
	n	15	14	17
E. faecalis	dbl-1(-)	0.38	0.6	0.35
	n	16	20	20
S. epidermidis	dbl-1(-)	0	0.05	0.22
	n	24	22	23
