# Supplementary figures and images for: The DBL-1/TGF-β signaling pathway tailors behavioral and molecular host responses to a variety of bacteria in Caenorhabditis elegans
Source: eLife journal article supplement (doi:10.7554/elife.75831), 2023-09-26

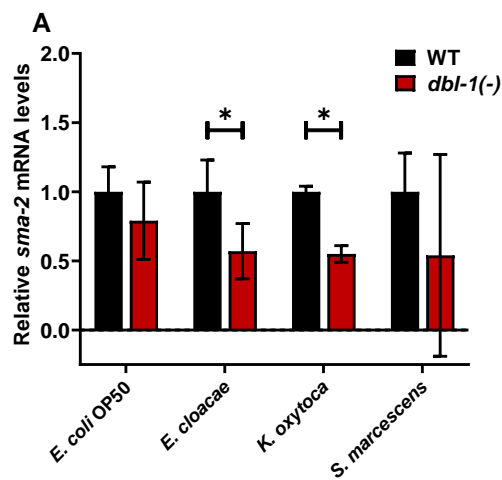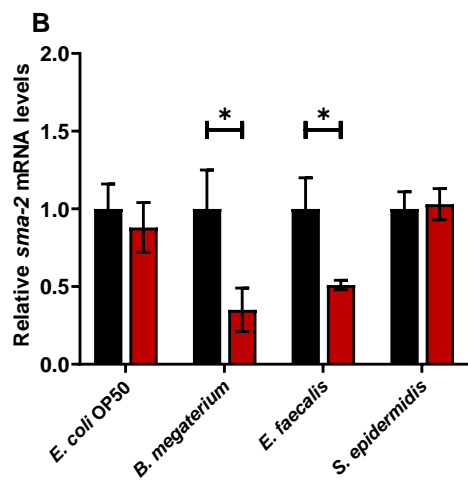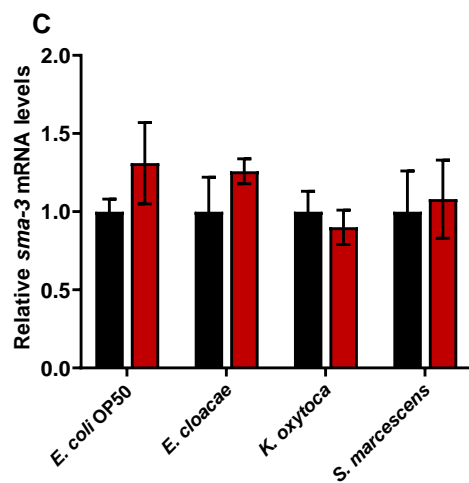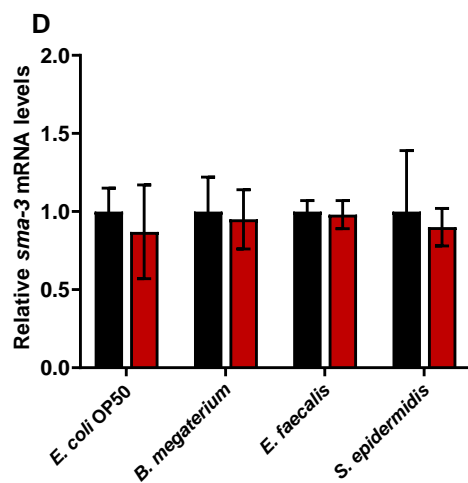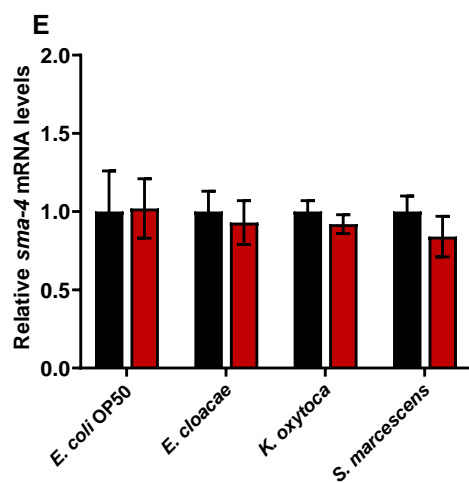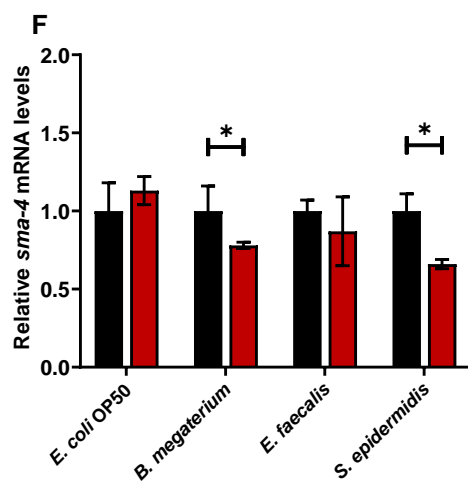

Supplement: supp [file elife_poa_e75831_Figure_4_figure_supplement_1.pdf › elife_poa_e75831_Figure_4_figure_supplement_1.pdf]
